# Supplementary material for: Automatic Parking Controller with a Twin Artificial Neural Network Architecture
Source: Hindawi journal article supplement (doi:10.1155/2019/4801985), 2019-01-01
Supplement: f1 [file 4801985.f1.zip]

Archive with 893 entries (892 files):
- data/
- data/data_1.txt
- data/data_10.txt
- data/data_100.txt
- data/data_101.txt
- data/data_102.txt
- data/data_103.txt
- data/data_104.txt
- data/data_105.txt
- data/data_106.txt
- data/data_107.txt
- data/data_108.txt
- data/data_109.txt
- data/data_11.txt
- data/data_110.txt
- data/data_111.txt
- data/data_112.txt
- data/data_113.txt
- data/data_114.txt
- data/data_115.txt
- data/data_116.txt
- data/data_117.txt
- data/data_118.txt
- data/data_119.txt
- data/data_12.txt
- data/data_120.txt
- data/data_121.txt
- data/data_122.txt
- data/data_123.txt
- data/data_124.txt
- data/data_125.txt
- data/data_126.txt
- data/data_127.txt
- data/data_128.txt
- data/data_129.txt
- data/data_13.txt
- data/data_130.txt
- data/data_131.txt
- data/data_132.txt
- data/data_133.txt
- data/data_134.txt
- data/data_135.txt
- data/data_136.txt
- data/data_137.txt
- data/data_138.txt
- data/data_139.txt
- data/data_14.txt
- data/data_140.txt
- data/data_141.txt
- data/data_142.txt
- data/data_143.txt
- data/data_144.txt
- data/data_145.txt
- data/data_146.txt
- data/data_147.txt
- data/data_148.txt
- data/data_149.txt
- data/data_15.txt
- data/data_150.txt
- data/data_151.txt
- data/data_152.txt
- data/data_153.txt
- data/data_154.txt
- data/data_155.txt
- data/data_156.txt
- data/data_157.txt
- data/data_158.txt
- data/data_159.txt
- data/data_16.txt
- data/data_160.txt
- data/data_161.txt
- data/data_162.txt
- data/data_163.txt
- data/data_164.txt
- data/data_165.txt
- data/data_166.txt
- data/data_167.txt
- data/data_168.txt
- data/data_169.txt
- data/data_17.txt
- data/data_170.txt
- data/data_171.txt
- data/data_172.txt
- data/data_173.txt
- data/data_174.txt
- data/data_175.txt
- data/data_176.txt
- data/data_177.txt
- data/data_178.txt
- data/data_179.txt
- data/data_18.txt
- data/data_180.txt
- data/data_181.txt
- data/data_182.txt
- data/data_183.txt
- data/data_184.txt
- data/data_185.txt
- data/data_186.txt
- data/data_187.txt
- data/data_188.txt
- data/data_189.txt
- data/data_19.txt
- data/data_190.txt
- data/data_191.txt
- data/data_192.txt
- data/data_193.txt
- data/data_194.txt
- data/data_195.txt
- data/data_196.txt
- data/data_197.txt
- data/data_198.txt
- data/data_199.txt
- data/data_2.txt
- data/data_20.txt
- data/data_200.txt
- data/data_201.txt
- data/data_202.txt
- data/data_203.txt
- data/data_204.txt
- data/data_205.txt
- data/data_206.txt
- data/data_207.txt
- data/data_208.txt
- data/data_209.txt
- data/data_21.txt
- data/data_210.txt
- data/data_211.txt
- data/data_212.txt
- data/data_213.txt
- data/data_214.txt
- data/data_215.txt
- data/data_216.txt
- data/data_217.txt
- data/data_218.txt
- data/data_219.txt
- data/data_22.txt
- data/data_220.txt
- data/data_221.txt
- data/data_222.txt
- data/data_223.txt
- data/data_224.txt
- data/data_225.txt
- data/data_226.txt
- data/data_227.txt
- data/data_228.txt
- data/data_229.txt
- data/data_23.txt
- data/data_230.txt
- data/data_231.txt
- data/data_232.txt
- data/data_233.txt
- data/data_234.txt
- data/data_235.txt
- data/data_236.txt
- data/data_237.txt
- data/data_238.txt
- data/data_239.txt
- data/data_24.txt
- data/data_240.txt
- data/data_241.txt
- data/data_242.txt
- data/data_243.txt
- data/data_244.txt
- data/data_245.txt
- data/data_246.txt
- data/data_247.txt
- data/data_248.txt
- data/data_249.txt
- data/data_25.txt
- data/data_250.txt
- data/data_251.txt
- data/data_252.txt
- data/data_253.txt
- data/data_254.txt
- data/data_255.txt
- data/data_256.txt
- data/data_257.txt
- data/data_258.txt
- data/data_259.txt
- data/data_26.txt
- data/data_260.txt
- data/data_261.txt
- data/data_262.txt
- data/data_263.txt
- data/data_264.txt
- data/data_265.txt
- data/data_266.txt
- data/data_267.txt
- data/data_268.txt
- data/data_269.txt
- data/data_27.txt
- data/data_270.txt
- data/data_271.txt
- data/data_272.txt
- data/data_273.txt
- data/data_274.txt
- data/data_275.txt
- data/data_276.txt
- data/data_277.txt
- data/data_278.txt
- data/data_279.txt
- data/data_28.txt
- data/data_280.txt
- data/data_281.txt
- data/data_282.txt
- data/data_283.txt
- data/data_284.txt
- data/data_285.txt
- data/data_286.txt
- data/data_287.txt
- data/data_288.txt
- data/data_289.txt
- data/data_29.txt
- data/data_290.txt
- data/data_291.txt
- data/data_292.txt
- data/data_293.txt
- data/data_294.txt
- data/data_295.txt
- data/data_296.txt
- data/data_297.txt
- data/data_298.txt
- data/data_299.txt
- data/data_3.txt
- data/data_30.txt
- data/data_300.txt
- data/data_301.txt
- data/data_302.txt
- data/data_303.txt
- data/data_304.txt
- data/data_305.txt
- data/data_306.txt
- data/data_307.txt
- data/data_308.txt
- data/data_309.txt
- data/data_31.txt
- data/data_310.txt
- data/data_311.txt
- data/data_312.txt
- data/data_313.txt
- data/data_314.txt
- data/data_315.txt
- data/data_316.txt
- data/data_317.txt
- data/data_318.txt
- data/data_319.txt
- data/data_32.txt
- data/data_320.txt
- data/data_321.txt
- data/data_322.txt
- data/data_323.txt
- data/data_324.txt
- data/data_325.txt
- data/data_326.txt
- data/data_327.txt
- data/data_328.txt
- data/data_329.txt
- data/data_33.txt
- data/data_330.txt
- data/data_331.txt
- data/data_332.txt
- data/data_333.txt
- data/data_334.txt
- data/data_335.txt
- data/data_336.txt
- data/data_337.txt
- data/data_338.txt
- data/data_339.txt
- data/data_34.txt
- data/data_340.txt
- data/data_341.txt
- data/data_342.txt
- data/data_343.txt
- data/data_344.txt
- data/data_345.txt
- data/data_346.txt
- data/data_347.txt
- data/data_348.txt
- data/data_349.txt
- data/data_35.txt
- data/data_350.txt
- data/data_351.txt
- data/data_352.txt
- data/data_353.txt
- data/data_354.txt
- data/data_355.txt
- data/data_356.txt
- data/data_357.txt
- data/data_358.txt
- data/data_359.txt
- data/data_36.txt
- data/data_360.txt
- data/data_361.txt
- data/data_362.txt
- data/data_363.txt
- data/data_364.txt
- data/data_365.txt
- data/data_366.txt
- data/data_367.txt
- data/data_368.txt
[truncated: 593 more entries]
