# Supplementary material for: Automatic Parking Controller with a Twin Artificial Neural Network Architecture
Source: Hindawi journal article supplement (doi:10.1155/2019/4801985), 2019-01-01
Supplement: f1 [file 4801985.f1.zip › data/data_1.txt]

6.200000 1.000000 0.000000 0.000000 0.000000 5.400000
6.196244 1.000000 -0.075000 0.000052 -0.032651 5.400000
6.185017 1.000000 -0.150000 0.000344 -0.072622 5.400000
6.166261 0.999989 -0.224999 0.001141 -0.112591 5.400000
6.139995 0.999940 -0.299999 0.002674 -0.152675 5.400000
6.106252 0.999801 -0.374999 0.005186 -0.192922 5.400000
6.065004 0.999517 -0.449999 0.008950 -0.233370 5.400000
6.016246 0.998950 -0.524999 0.014235 -0.274032 5.400000
5.960013 0.997958 -0.599998 0.021311 -0.314989 5.400000
5.896287 0.996317 -0.674998 0.030491 -0.356299 5.400000
5.825081 0.993740 -0.749998 0.042096 -0.398104 5.400000
5.746429 0.989872 -0.824998 0.056476 -0.440604 5.400000
5.660365 0.984263 -0.899997 0.074059 -0.481673 5.400000
5.566949 0.976367 -0.974997 0.094857 -0.506346 5.400000
5.466272 0.965589 -1.049997 0.118627 -0.531066 5.400000
5.358475 0.951283 -1.124997 0.145616 -0.555877 5.400000
5.243724 0.932690 -1.199997 0.176001 -0.576613 5.400000
5.122261 0.909013 -1.274996 0.208887 -0.576510 5.400000
4.994367 0.879566 -1.349996 0.243741 -0.576564 5.400000
4.860372 0.843616 -1.424996 0.280586 -0.576345 5.400000
4.720644 0.800444 -1.499996 0.318227 -0.546458 5.400000
4.575526 0.749661 -1.574996 0.354465 -0.506714 5.400000
4.425324 0.691034 -1.649995 0.389322 -0.471017 5.400000
4.270325 0.624337 -1.724995 0.422880 -0.437838 5.400000
4.110814 0.549378 -1.799995 0.455182 -0.406622 5.400000
3.947074 0.466016 -1.874995 0.486266 -0.378130 5.400000
3.779336 0.374150 -1.950690 0.515037 -0.322848 5.400000
3.607946 0.274323 -1.992559 0.538279 -0.238908 5.400000
3.437114 0.170399 -2.000000 0.553519 -0.139408 5.400000
3.267384 0.064539 -1.999644 0.560497 -0.039408 5.400000
3.099109 -0.041172 -1.956827 0.559772 0.060592 5.400000
2.936111 -0.142514 -1.881857 0.551346 0.160591 5.400000
2.778314 -0.237989 -1.806857 0.535733 0.260591 5.400000
2.625219 -0.326685 -1.731857 0.513194 0.360591 5.400000
2.476466 -0.407809 -1.656857 0.483921 0.460590 5.400000
2.331873 -0.480617 -1.581490 0.447857 0.567022 5.400000
2.191123 -0.544793 -1.510297 0.407008 0.593400 5.400000
2.054760 -0.600408 -1.435285 0.367585 0.593400 5.400000
1.923411 -0.648191 -1.360288 0.330177 0.593400 5.400000
1.797547 -0.688851 -1.285293 0.294771 0.593400 5.400000
1.677568 -0.723104 -1.210286 0.261373 0.593400 5.400000
1.563817 -0.751627 -1.135290 0.229984 0.593400 5.400000
1.456571 -0.775075 -1.060292 0.200597 0.593400 5.400000
1.356078 -0.794085 -0.985288 0.173224 0.593400 5.400000
1.262520 -0.809239 -0.910292 0.147855 0.593400 5.400000
1.176058 -0.821088 -0.835286 0.124500 0.593400 5.400000
1.096795 -0.830146 -0.760290 0.103142 0.593400 5.400000
1.024825 -0.836887 -0.685287 0.083795 0.593400 5.400000
0.960234 -0.841750 -0.610288 0.066462 0.593400 5.400000
0.903057 -0.845118 -0.535292 0.051127 0.593400 5.400000
0.853327 -0.847330 -0.460285 0.037808 0.593400 5.400000
0.811070 -0.848687 -0.385290 0.026485 0.593400 5.400000
0.776305 -0.849453 -0.310293 0.017175 0.593400 5.400000
0.749021 -0.849816 -0.235288 0.009879 0.593400 5.400000
0.729237 -0.849956 -0.160292 0.004588 0.593400 5.400000
0.716961 -0.849999 -0.085288 0.001299 0.593400 5.400000
