# Supplementary material for: Automatic Parking Controller with a Twin Artificial Neural Network Architecture
Source: Hindawi journal article supplement (doi:10.1155/2019/4801985), 2019-01-01
Supplement: f1 [file 4801985.f1.zip › data/data_2.txt]

6.300000 1.000000 0.000000 -0.000000 0.000000 5.400000
6.296250 1.000000 -0.075002 0.000043 -0.028480 5.400000
6.285015 1.000000 -0.150001 0.000318 -0.065096 5.400000
6.266257 0.999990 -0.224997 0.001055 -0.101563 5.400000
6.239994 0.999944 -0.299999 0.002453 -0.138044 5.400000
6.206258 0.999821 -0.375002 0.004757 -0.174495 5.400000
6.165008 0.999559 -0.450004 0.008184 -0.210891 5.400000
6.116251 0.999044 -0.524996 0.012975 -0.247181 5.400000
6.060015 0.998140 -0.599998 0.019363 -0.283295 5.400000
5.996278 0.996645 -0.675001 0.027605 -0.319151 5.400000
5.925065 0.994321 -0.750004 0.037951 -0.354611 5.400000
5.846397 0.990844 -0.824995 0.050642 -0.389675 5.400000
5.760296 0.985829 -0.899998 0.065902 -0.417230 5.400000
5.666799 0.978835 -0.975000 0.083661 -0.441945 5.400000
5.566002 0.969358 -1.050003 0.104076 -0.466671 5.400000
5.457977 0.956821 -1.124994 0.127352 -0.491387 5.400000
5.342873 0.940551 -1.199997 0.153740 -0.516106 5.400000
5.220881 0.919807 -1.274999 0.183468 -0.541736 5.400000
5.092246 0.893769 -1.350002 0.216217 -0.549912 5.400000
4.957269 0.861651 -1.424995 0.250742 -0.543391 5.400000
4.816271 0.822846 -1.499996 0.286229 -0.529519 5.400000
4.669602 0.776785 -1.574998 0.322193 -0.511752 5.400000
4.517602 0.722945 -1.650001 0.358307 -0.492677 5.400000
4.360688 0.660906 -1.725004 0.394453 -0.473925 5.400000
4.199240 0.590231 -1.799995 0.430602 -0.456564 5.400000
4.033692 0.510501 -1.874998 0.466864 -0.442085 5.400000
3.864434 0.421474 -1.951342 0.500341 -0.371293 5.400000
3.691855 0.323874 -1.999133 0.527812 -0.288935 5.400000
3.520105 0.221333 -2.000000 0.547128 -0.188090 5.400000
3.349943 0.116229 -2.000000 0.558211 -0.088094 5.400000
3.180628 0.010015 -1.993240 0.561118 0.011915 5.400000
3.014764 -0.093847 -1.918384 0.556367 0.111912 5.400000
2.854510 -0.192311 -1.843366 0.544208 0.211910 5.400000
2.699181 -0.284407 -1.768364 0.525019 0.311907 5.400000
2.548350 -0.369317 -1.693371 0.499008 0.411914 5.400000
2.401743 -0.446269 -1.618369 0.466293 0.511912 5.400000
2.259154 -0.514669 -1.545243 0.426974 0.593400 5.400000
2.120553 -0.574360 -1.471803 0.386528 0.593400 5.400000
1.986702 -0.625865 -1.396796 0.348136 0.593400 5.400000
1.858110 -0.669906 -1.321800 0.311761 0.593400 5.400000
1.735217 -0.707186 -1.246794 0.277383 0.593400 5.400000
1.618391 -0.738413 -1.171798 0.245018 0.593400 5.400000
1.507955 -0.764253 -1.096802 0.214659 0.593400 5.400000
1.404145 -0.785353 -1.021796 0.186304 0.593400 5.400000
1.307191 -0.802306 -0.946800 0.159954 0.593400 5.400000
1.217255 -0.815694 -0.871799 0.135615 0.593400 5.400000
1.134468 -0.826049 -0.796798 0.113289 0.593400 5.400000
1.058945 -0.833870 -0.721802 0.092964 0.593400 5.400000
0.990757 -0.839596 -0.646796 0.074654 0.593400 5.400000
0.929957 -0.843640 -0.571800 0.058338 0.593400 5.400000
0.876605 -0.846375 -0.496804 0.044036 0.593400 5.400000
0.830706 -0.848122 -0.421798 0.031749 0.593400 5.400000
0.792290 -0.849136 -0.346802 0.021457 0.593400 5.400000
0.761362 -0.849676 -0.271795 0.013181 0.593400 5.400000
0.737936 -0.849909 -0.196800 0.006915 0.593400 5.400000
0.722006 -0.849984 -0.121804 0.002648 0.593400 5.400000
