# Supplementary material for: Automatic Parking Controller with a Twin Artificial Neural Network Architecture
Source: Hindawi journal article supplement (doi:10.1155/2019/4801985), 2019-01-01
Supplement: f1 [file 4801985.f1.zip › data/data_10.txt]

7.100000 1.000000 0.000000 0.000000 0.000000 5.400000
7.096298 1.000000 -0.075000 0.000010 -0.003866 5.400000
7.085005 1.000000 -0.150001 0.000112 -0.010611 5.400000
7.066247 0.999996 -0.225001 0.000355 -0.021424 5.400000
7.040006 0.999980 -0.300001 0.000803 -0.032707 5.400000
7.006251 0.999941 -0.375001 0.001531 -0.044091 5.400000
6.965008 0.999856 -0.450001 0.002613 -0.055626 5.400000
6.916247 0.999699 -0.524996 0.004122 -0.067357 5.400000
6.860010 0.999403 -0.600002 0.006123 -0.079319 5.400000
6.796250 0.998935 -0.674997 0.008706 -0.091584 5.400000
6.725013 0.998200 -0.750002 0.011943 -0.104196 5.400000
6.646264 0.997110 -0.824998 0.015937 -0.117245 5.400000
6.560038 0.995535 -0.900003 0.020767 -0.130813 5.400000
6.466305 0.993320 -0.974998 0.026553 -0.145047 5.400000
6.365107 0.990295 -1.050003 0.033405 -0.160077 5.400000
6.256430 0.986227 -1.124999 0.041463 -0.176119 5.400000
6.140302 0.980874 -1.199994 0.050876 -0.193474 5.400000
6.016746 0.973917 -1.275000 0.061941 -0.215890 5.400000
5.885812 0.964952 -1.349994 0.075000 -0.240724 5.400000
5.747530 0.953525 -1.425001 0.090267 -0.265442 5.400000
5.601998 0.939084 -1.499995 0.107916 -0.290349 5.400000
5.449319 0.921003 -1.575002 0.128222 -0.322416 5.400000
5.289650 0.898527 -1.649996 0.152075 -0.365550 5.400000
5.123217 0.870645 -1.725002 0.180651 -0.423480 5.400000
4.950426 0.836012 -1.799996 0.216273 -0.514635 5.400000
4.771875 0.792626 -1.874994 0.261249 -0.556238 5.400000
4.588409 0.738665 -1.951323 0.311475 -0.576215 5.400000
4.401352 0.672953 -1.996339 0.364110 -0.576433 5.400000
4.216434 0.596800 -2.000000 0.417247 -0.580136 5.400000
4.035655 0.511264 -2.000000 0.464446 -0.484315 5.400000
3.858598 0.418287 -2.000000 0.501235 -0.383920 5.400000
3.684628 0.319637 -2.000000 0.528831 -0.283918 5.400000
3.512972 0.217001 -2.000000 0.547714 -0.183915 5.400000
3.342869 0.111809 -2.000000 0.558524 -0.083922 5.400000
3.173625 0.005609 -1.987382 0.561053 0.016078 5.400000
3.007978 -0.098071 -1.915432 0.555998 0.116080 5.400000
2.847937 -0.196275 -1.840240 0.543571 0.216082 5.400000
2.692810 -0.288117 -1.765243 0.524044 0.316085 5.400000
2.542155 -0.372679 -1.690239 0.497791 0.416076 5.400000
2.395713 -0.449297 -1.615243 0.464776 0.516078 5.400000
2.253285 -0.517332 -1.542609 0.425237 0.593400 5.400000
2.114872 -0.576667 -1.468676 0.384886 0.593400 5.400000
1.981232 -0.627847 -1.393669 0.346580 0.593400 5.400000
1.852868 -0.671590 -1.318673 0.310286 0.593400 5.400000
1.730222 -0.708604 -1.243666 0.275993 0.593400 5.400000
1.613657 -0.739593 -1.168671 0.243712 0.593400 5.400000
1.503492 -0.765222 -1.093675 0.213436 0.593400 5.400000
1.399964 -0.786139 -1.018669 0.185165 0.593400 5.400000
1.303300 -0.802932 -0.943673 0.158898 0.593400 5.400000
1.213659 -0.816184 -0.868670 0.134643 0.593400 5.400000
1.131172 -0.826424 -0.793671 0.112402 0.593400 5.400000
1.055954 -0.834147 -0.718675 0.092160 0.593400 5.400000
0.988074 -0.839796 -0.643668 0.073933 0.593400 5.400000
0.927585 -0.843779 -0.568672 0.057702 0.593400 5.400000
0.874543 -0.846466 -0.493676 0.043484 0.593400 5.400000
0.828955 -0.848177 -0.418670 0.031281 0.593400 5.400000
0.790849 -0.849167 -0.343674 0.021072 0.593400 5.400000
0.760234 -0.849692 -0.268668 0.012878 0.593400 5.400000
0.737121 -0.849914 -0.193672 0.006697 0.593400 5.400000
0.721502 -0.849985 -0.118677 0.002513 0.593400 5.400000
