# Supplementary material for: Automatic Parking Controller with a Twin Artificial Neural Network Architecture
Source: Hindawi journal article supplement (doi:10.1155/2019/4801985), 2019-01-01
Supplement: f1 [file 4801985.f1.zip › data/data_11.txt]

7.200000 1.000000 0.000000 0.000000 0.000000 5.400000
7.196304 1.000000 -0.075001 0.000010 -0.002943 5.400000
7.184999 1.000000 -0.150001 0.000088 -0.007380 5.400000
7.166260 0.999997 -0.225002 0.000289 -0.014992 5.400000
7.139993 0.999981 -0.300002 0.000667 -0.024298 5.400000
7.106255 0.999948 -0.375003 0.001268 -0.033670 5.400000
7.064996 0.999884 -0.450003 0.002167 -0.043273 5.400000
7.016251 0.999743 -0.525004 0.003411 -0.053158 5.400000
6.959997 0.999507 -0.600004 0.005077 -0.063383 5.400000
6.896257 0.999117 -0.675001 0.007234 -0.074013 5.400000
6.824997 0.998511 -0.749996 0.009944 -0.085125 5.400000
6.746266 0.997597 -0.824996 0.013314 -0.096819 5.400000
6.660016 0.996278 -0.899997 0.017420 -0.109179 5.400000
6.566289 0.994421 -0.974997 0.022358 -0.122339 5.400000
6.465071 0.991865 -1.049998 0.028265 -0.136460 5.400000
6.356378 0.988414 -1.124998 0.035259 -0.151737 5.400000
6.240209 0.983853 -1.199999 0.043501 -0.168305 5.400000
6.116617 0.977880 -1.274999 0.053222 -0.188934 5.400000
5.985584 0.970153 -1.350000 0.064824 -0.213898 5.400000
5.847198 0.960249 -1.425001 0.078519 -0.238615 5.400000
5.701491 0.947629 -1.500001 0.094495 -0.263092 5.400000
5.548567 0.931740 -1.575002 0.112997 -0.294549 5.400000
5.388546 0.911855 -1.650002 0.134819 -0.336036 5.400000
5.221640 0.887051 -1.725003 0.161036 -0.389852 5.400000
5.048133 0.856075 -1.800003 0.193424 -0.475730 5.400000
4.868591 0.817112 -1.875004 0.235326 -0.548830 5.400000
4.683763 0.767946 -1.951127 0.285019 -0.574715 5.400000
4.495069 0.707268 -2.000000 0.337512 -0.571678 5.400000
4.308143 0.636016 -2.000000 0.390910 -0.589122 5.400000
4.125315 0.555013 -2.000000 0.442331 -0.535642 5.400000
3.946485 0.465473 -2.000000 0.484113 -0.433768 5.400000
3.771057 0.369456 -2.000000 0.516165 -0.333767 5.400000
3.598349 0.268595 -2.000000 0.539376 -0.233766 5.400000
3.427575 0.164510 -2.000000 0.554080 -0.133767 5.400000
3.257868 0.058540 -1.999730 0.560807 -0.033775 5.400000
3.089765 -0.047019 -1.953283 0.559615 0.066226 5.400000
2.927074 -0.148071 -1.877630 0.550658 0.166227 5.400000
2.769560 -0.243178 -1.802629 0.534648 0.266228 5.400000
2.616717 -0.331486 -1.727629 0.511718 0.366228 5.400000
2.468199 -0.412130 -1.652628 0.482082 0.466229 5.400000
2.323855 -0.484446 -1.577068 0.445580 0.575855 5.400000
2.183309 -0.548150 -1.506060 0.404732 0.593400 5.400000
2.047214 -0.603304 -1.431054 0.365422 0.593400 5.400000
1.916161 -0.650667 -1.356058 0.328126 0.593400 5.400000
1.790620 -0.690948 -1.281063 0.292835 0.593400 5.400000
1.670982 -0.724860 -1.206056 0.259549 0.593400 5.400000
1.557593 -0.753080 -1.131060 0.228274 0.593400 5.400000
1.450721 -0.776259 -1.056060 0.199002 0.593400 5.400000
1.350616 -0.795037 -0.981058 0.171740 0.593400 5.400000
1.257454 -0.809989 -0.906062 0.146484 0.593400 5.400000
1.171395 -0.821668 -0.831056 0.123243 0.593400 5.400000
1.092543 -0.830583 -0.756060 0.101996 0.593400 5.400000
1.020985 -0.837207 -0.681055 0.082763 0.593400 5.400000
0.956809 -0.841976 -0.606058 0.065545 0.593400 5.400000
0.900052 -0.845269 -0.531062 0.050322 0.593400 5.400000
0.850745 -0.847428 -0.456055 0.037115 0.593400 5.400000
0.808910 -0.848743 -0.381060 0.025906 0.593400 5.400000
0.774567 -0.849482 -0.306062 0.016711 0.593400 5.400000
0.747708 -0.849829 -0.231058 0.009528 0.593400 5.400000
0.728348 -0.849960 -0.156062 0.004350 0.593400 5.400000
0.716495 -0.850000 -0.081056 0.001174 0.593400 5.400000
