# Supplementary material for: Automatic Parking Controller with a Twin Artificial Neural Network Architecture
Source: Hindawi journal article supplement (doi:10.1155/2019/4801985), 2019-01-01
Supplement: f1 [file 4801985.f1.zip › data/data_12.txt]

7.300000 1.000000 0.000000 0.000000 0.000000 5.400000
7.296313 1.000000 -0.074999 0.000006 -0.002347 5.400000
7.284990 1.000000 -0.149999 0.000066 -0.004901 5.400000
7.266265 0.999996 -0.224998 0.000239 -0.009874 5.400000
7.239993 0.999990 -0.299998 0.000549 -0.017034 5.400000
7.206262 0.999961 -0.375004 0.001040 -0.024673 5.400000
7.164994 0.999900 -0.449997 0.001778 -0.032601 5.400000
7.116261 0.999792 -0.525003 0.002798 -0.040880 5.400000
7.059994 0.999599 -0.599997 0.004175 -0.049587 5.400000
6.996255 0.999277 -0.675003 0.005959 -0.058778 5.400000
6.924997 0.998775 -0.749996 0.008224 -0.068561 5.400000
6.846267 0.998017 -0.825002 0.011045 -0.079006 5.400000
6.760009 0.996922 -0.899995 0.014518 -0.090238 5.400000
6.666287 0.995370 -0.975001 0.018728 -0.102384 5.400000
6.565052 0.993220 -1.050002 0.023799 -0.115585 5.400000
6.456344 0.990312 -1.125000 0.029863 -0.130036 5.400000
6.340153 0.986430 -1.200000 0.037064 -0.145923 5.400000
6.216517 0.981330 -1.274999 0.045593 -0.164251 5.400000
6.085431 0.974690 -1.349999 0.055854 -0.189013 5.400000
5.946948 0.966116 -1.424999 0.068118 -0.213737 5.400000
5.801115 0.955137 -1.499997 0.082562 -0.238206 5.400000
5.647994 0.941190 -1.574998 0.099381 -0.267807 5.400000
5.487711 0.923649 -1.649996 0.119287 -0.307044 5.400000
5.320406 0.901615 -1.724997 0.143231 -0.356816 5.400000
5.146347 0.873982 -1.800003 0.172620 -0.427413 5.400000
4.965928 0.839137 -1.874996 0.210503 -0.533398 5.400000
4.779902 0.794780 -1.951837 0.258686 -0.564336 5.400000
4.589633 0.739054 -1.994797 0.311075 -0.572378 5.400000
4.400938 0.672834 -2.000000 0.364326 -0.579609 5.400000
4.216049 0.596600 -2.000000 0.417640 -0.571888 5.400000
4.035278 0.511103 -2.000000 0.464515 -0.483686 5.400000
3.858238 0.418075 -2.000000 0.501330 -0.383688 5.400000
3.684259 0.319438 -2.000000 0.528846 -0.283691 5.400000
3.512624 0.216777 -2.000000 0.547789 -0.183694 5.400000
3.342515 0.111603 -2.000000 0.558421 -0.083685 5.400000
3.173212 0.005352 -1.987361 0.560850 0.016313 5.400000
3.007605 -0.098307 -1.915076 0.555988 0.116311 5.400000
2.847576 -0.196499 -1.840067 0.543523 0.216308 5.400000
2.692459 -0.288319 -1.765063 0.524001 0.316306 5.400000
2.541815 -0.372866 -1.690069 0.497722 0.416315 5.400000
2.395387 -0.449462 -1.615064 0.464696 0.516312 5.400000
2.252961 -0.517479 -1.542463 0.425142 0.593400 5.400000
2.114559 -0.576794 -1.468503 0.384795 0.593400 5.400000
1.980930 -0.627955 -1.393496 0.346494 0.593400 5.400000
1.852579 -0.671683 -1.318500 0.310205 0.593400 5.400000
1.729947 -0.708682 -1.243494 0.275916 0.593400 5.400000
1.613396 -0.739658 -1.168498 0.243640 0.593400 5.400000
1.503246 -0.765275 -1.093502 0.213369 0.593400 5.400000
1.399734 -0.786182 -1.018496 0.185102 0.593400 5.400000
1.303085 -0.802966 -0.943500 0.158840 0.593400 5.400000
1.213461 -0.816211 -0.868498 0.134590 0.593400 5.400000
1.130991 -0.826444 -0.793498 0.112353 0.593400 5.400000
1.055789 -0.834162 -0.718502 0.092116 0.593400 5.400000
0.987927 -0.839806 -0.643496 0.073893 0.593400 5.400000
0.927454 -0.843786 -0.568500 0.057667 0.593400 5.400000
0.874429 -0.846470 -0.493504 0.043454 0.593400 5.400000
0.828859 -0.848180 -0.418498 0.031255 0.593400 5.400000
0.790770 -0.849169 -0.343502 0.021051 0.593400 5.400000
0.760173 -0.849693 -0.268495 0.012862 0.593400 5.400000
0.737076 -0.849914 -0.193500 0.006685 0.593400 5.400000
0.721474 -0.849985 -0.118504 0.002505 0.593400 5.400000
