# Supplementary material for: Automatic Parking Controller with a Twin Artificial Neural Network Architecture
Source: Hindawi journal article supplement (doi:10.1155/2019/4801985), 2019-01-01
Supplement: f1 [file 4801985.f1.zip › data/data_13.txt]

7.400000 1.000000 0.000000 0.000000 0.000000 5.400000
7.396322 1.000000 -0.075003 0.000006 -0.001843 5.400000
7.384979 1.000000 -0.149996 0.000055 -0.003733 5.400000
7.366264 1.000000 -0.224999 0.000183 -0.006437 5.400000
7.339988 0.999993 -0.300002 0.000438 -0.010954 5.400000
7.306259 0.999965 -0.375002 0.000848 -0.017042 5.400000
7.264993 0.999923 -0.449997 0.001442 -0.023538 5.400000
7.216260 0.999836 -0.525000 0.002276 -0.030432 5.400000
7.159994 0.999673 -0.600004 0.003404 -0.037801 5.400000
7.096257 0.999411 -0.674996 0.004875 -0.045738 5.400000
7.024996 0.998999 -0.749999 0.006752 -0.054316 5.400000
6.946248 0.998374 -0.825002 0.009116 -0.063637 5.400000
6.860013 0.997468 -0.900001 0.012034 -0.073806 5.400000
6.766268 0.996176 -0.974998 0.015617 -0.084952 5.400000
6.665032 0.994379 -1.050001 0.019962 -0.097217 5.400000
6.556310 0.991931 -1.125004 0.025201 -0.110785 5.400000
6.440112 0.988650 -1.200004 0.031480 -0.125861 5.400000
6.316430 0.984299 -1.274999 0.038967 -0.142575 5.400000
6.185310 0.978620 -1.350002 0.047990 -0.165448 5.400000
6.046756 0.971217 -1.425006 0.058920 -0.190202 5.400000
5.900817 0.961688 -1.499998 0.071928 -0.214914 5.400000
5.747554 0.949490 -1.575001 0.087213 -0.241841 5.400000
5.587045 0.934038 -1.650004 0.105265 -0.278467 5.400000
5.419432 0.914533 -1.725003 0.127006 -0.323724 5.400000
5.244899 0.889955 -1.800000 0.153593 -0.388776 5.400000
5.063816 0.858875 -1.875003 0.187816 -0.490393 5.400000
4.876753 0.819065 -1.950871 0.232930 -0.549945 5.400000
4.685146 0.768438 -2.000000 0.284475 -0.573230 5.400000
4.494697 0.707175 -2.000000 0.337846 -0.577807 5.400000
4.307858 0.635919 -2.000000 0.391188 -0.577452 5.400000
4.125044 0.554849 -2.000000 0.442350 -0.535473 5.400000
3.946209 0.465341 -2.000000 0.484137 -0.433640 5.400000
3.770794 0.369287 -2.000000 0.516219 -0.333641 5.400000
3.598081 0.268435 -2.000000 0.539379 -0.233642 5.400000
3.427311 0.164344 -2.000000 0.554140 -0.133637 5.400000
3.257642 0.058404 -2.000000 0.560901 -0.033644 5.400000
3.089573 -0.047147 -1.954544 0.559688 0.066361 5.400000
2.926868 -0.148196 -1.877533 0.550624 0.166363 5.400000
2.769351 -0.243300 -1.802530 0.534628 0.266359 5.400000
2.616520 -0.331593 -1.727526 0.511677 0.366361 5.400000
2.468012 -0.412232 -1.652534 0.482042 0.466358 5.400000
2.323673 -0.484530 -1.576950 0.445520 0.576321 5.400000
2.183129 -0.548227 -1.505963 0.404679 0.593400 5.400000
2.047040 -0.603371 -1.430957 0.365372 0.593400 5.400000
1.915994 -0.650724 -1.355961 0.328079 0.593400 5.400000
1.790461 -0.690996 -1.280965 0.292790 0.593400 5.400000
1.670831 -0.724900 -1.205959 0.259507 0.593400 5.400000
1.557450 -0.753113 -1.130963 0.228235 0.593400 5.400000
1.450587 -0.776287 -1.055963 0.198965 0.593400 5.400000
1.350490 -0.795059 -0.980961 0.171706 0.593400 5.400000
1.257338 -0.810006 -0.905965 0.146453 0.593400 5.400000
1.171288 -0.821681 -0.830959 0.123214 0.593400 5.400000
1.092445 -0.830593 -0.755963 0.101970 0.593400 5.400000
1.020897 -0.837214 -0.680958 0.082740 0.593400 5.400000
0.956731 -0.841981 -0.605960 0.065524 0.593400 5.400000
0.899984 -0.845273 -0.530964 0.050304 0.593400 5.400000
0.850686 -0.847430 -0.455958 0.037099 0.593400 5.400000
0.808861 -0.848744 -0.380962 0.025893 0.593400 5.400000
0.774527 -0.849482 -0.305964 0.016701 0.593400 5.400000
0.747678 -0.849830 -0.230960 0.009520 0.593400 5.400000
0.728328 -0.849960 -0.155964 0.004344 0.593400 5.400000
0.716484 -0.850000 -0.080959 0.001172 0.593400 5.400000
