# Supplementary material for: Automatic Parking Controller with a Twin Artificial Neural Network Architecture
Source: Hindawi journal article supplement (doi:10.1155/2019/4801985), 2019-01-01
Supplement: f1 [file 4801985.f1.zip › data/data_14.txt]

6.300000 1.100000 0.000000 0.000000 0.000000 5.400000
6.296250 1.100000 -0.074995 0.000054 -0.036919 5.400000
6.285022 1.099998 -0.150002 0.000379 -0.080602 5.400000
6.266250 1.099980 -0.224997 0.001245 -0.124418 5.400000
6.239996 1.099929 -0.300000 0.002919 -0.168600 5.400000
6.206258 1.099790 -0.374999 0.005674 -0.213277 5.400000
6.165006 1.099466 -0.449995 0.009824 -0.258632 5.400000
6.116250 1.098853 -0.525001 0.015665 -0.304941 5.400000
6.060023 1.097756 -0.599996 0.023570 -0.352637 5.400000
5.996291 1.095929 -0.675003 0.033918 -0.402515 5.400000
5.925101 1.093049 -0.749998 0.047209 -0.456097 5.400000
5.846476 1.088694 -0.824997 0.064102 -0.513586 5.400000
5.760468 1.082284 -0.900000 0.084748 -0.539525 5.400000
5.667149 1.073253 -0.974995 0.108492 -0.564977 5.400000
5.566652 1.060963 -1.050002 0.135188 -0.576435 5.400000
5.459125 1.044749 -1.124997 0.164072 -0.575845 5.400000
5.344742 1.023992 -1.200001 0.194943 -0.575786 5.400000
5.223758 0.998037 -1.274999 0.227816 -0.576639 5.400000
5.096443 0.966168 -1.349995 0.262687 -0.578332 5.400000
4.963140 0.927683 -1.425001 0.299542 -0.578655 5.400000
4.824272 0.881836 -1.499996 0.337898 -0.559704 5.400000
4.680185 0.828205 -1.575003 0.373748 -0.491427 5.400000
4.531088 0.766819 -1.649998 0.406529 -0.438763 5.400000
4.377144 0.697714 -1.724998 0.436759 -0.391273 5.400000
4.218520 0.620894 -1.800000 0.464547 -0.346308 5.400000
4.055335 0.536446 -1.874995 0.489848 -0.302675 5.400000
3.887623 0.444506 -1.952256 0.512563 -0.259832 5.400000
3.715789 0.345469 -1.991771 0.532399 -0.214421 5.400000
3.544370 0.242531 -2.000000 0.548474 -0.167109 5.400000
3.374344 0.137223 -2.000000 0.559585 -0.093864 5.400000
3.205151 0.030617 -1.999650 0.563641 -0.001200 5.400000
3.038488 -0.074448 -1.932460 0.559858 0.098800 5.400000
2.877447 -0.174257 -1.857170 0.548633 0.198800 5.400000
2.721384 -0.267827 -1.782168 0.530288 0.298800 5.400000
2.569840 -0.354270 -1.707173 0.505102 0.398800 5.400000
2.422512 -0.432816 -1.632165 0.473201 0.498800 5.400000
2.279229 -0.502851 -1.557558 0.434548 0.593400 5.400000
2.139812 -0.564117 -1.485455 0.393733 0.593400 5.400000
2.005051 -0.617065 -1.410451 0.354978 0.593400 5.400000
1.875468 -0.662407 -1.335456 0.318235 0.593400 5.400000
1.751509 -0.700872 -1.260453 0.283488 0.593400 5.400000
1.633557 -0.733151 -1.185455 0.250763 0.593400 5.400000
1.521935 -0.759923 -1.110455 0.220031 0.593400 5.400000
1.416906 -0.781833 -1.035454 0.191312 0.593400 5.400000
1.318689 -0.799502 -0.960458 0.164605 0.593400 5.400000
1.227457 -0.813501 -0.885453 0.139903 0.593400 5.400000
1.143371 -0.824373 -0.810459 0.117205 0.593400 5.400000
1.066516 -0.832610 -0.735455 0.096520 0.593400 5.400000
0.996985 -0.838684 -0.660458 0.077837 0.593400 5.400000
0.934842 -0.843015 -0.585457 0.061162 0.593400 5.400000
0.880124 -0.845963 -0.510457 0.046497 0.593400 5.400000
0.832873 -0.847859 -0.435459 0.033835 0.593400 5.400000
0.793089 -0.848992 -0.360456 0.023185 0.593400 5.400000
0.760799 -0.849608 -0.285461 0.014540 0.593400 5.400000
0.736007 -0.849886 -0.210457 0.007899 0.593400 5.400000
0.718705 -0.849977 -0.135461 0.003271 0.593400 5.400000
