# Supplementary material for: Automatic Parking Controller with a Twin Artificial Neural Network Architecture
Source: Hindawi journal article supplement (doi:10.1155/2019/4801985), 2019-01-01
Supplement: f1 [file 4801985.f1.zip › data/data_15.txt]

6.400000 1.100000 0.000000 0.000000 0.000000 5.400000
6.396255 1.100000 -0.075001 0.000046 -0.032292 5.400000
6.385022 1.099999 -0.149998 0.000351 -0.072193 5.400000
6.366238 1.099981 -0.225002 0.001140 -0.112040 5.400000
6.339996 1.099934 -0.300002 0.002672 -0.152000 5.400000
6.306260 1.099805 -0.375000 0.005177 -0.192085 5.400000
6.264995 1.099519 -0.450003 0.008940 -0.232322 5.400000
6.216257 1.098955 -0.524998 0.014199 -0.272712 5.400000
6.160020 1.097967 -0.600003 0.021251 -0.313292 5.400000
6.096279 1.096323 -0.674996 0.030391 -0.354082 5.400000
6.025084 1.093759 -0.750001 0.041925 -0.395121 5.400000
5.946427 1.089913 -0.824995 0.056194 -0.436543 5.400000
5.860353 1.084323 -0.899998 0.073590 -0.473566 5.400000
5.766938 1.076497 -0.975003 0.094016 -0.498645 5.400000
5.666255 1.065827 -1.049997 0.117394 -0.523369 5.400000
5.558431 1.051666 -1.125001 0.143963 -0.548085 5.400000
5.443654 1.033292 -1.199998 0.173937 -0.572255 5.400000
5.322143 1.009880 -1.274998 0.206746 -0.573890 5.400000
5.194175 0.980698 -1.349999 0.241652 -0.575524 5.400000
5.060095 0.945081 -1.424996 0.277414 -0.551718 5.400000
4.920179 0.902526 -1.500000 0.312376 -0.512843 5.400000
4.774700 0.852783 -1.575001 0.346086 -0.476183 5.400000
4.623947 0.795602 -1.649998 0.378488 -0.440780 5.400000
4.468146 0.730779 -1.725002 0.409530 -0.406376 5.400000
4.307549 0.658189 -1.799996 0.439108 -0.372864 5.400000
4.142370 0.577706 -1.875001 0.467149 -0.340190 5.400000
3.972786 0.489287 -1.950209 0.493573 -0.308384 5.400000
3.799411 0.393195 -2.000000 0.518118 -0.274511 5.400000
3.626695 0.292214 -2.000000 0.539266 -0.225457 5.400000
3.455939 0.188074 -2.000000 0.554818 -0.147080 5.400000
3.286409 0.081935 -2.000000 0.562684 -0.049290 5.400000
3.117876 -0.024507 -1.968780 0.562707 0.050713 5.400000
2.954235 -0.126981 -1.893242 0.554920 0.150711 5.400000
2.795844 -0.223673 -1.818237 0.539977 0.250708 5.400000
2.642174 -0.313645 -1.743233 0.518061 0.350706 5.400000
2.492851 -0.396074 -1.668240 0.489382 0.450714 5.400000
2.347653 -0.470238 -1.593029 0.453932 0.554473 5.400000
2.206312 -0.535740 -1.521667 0.413084 0.593400 5.400000
2.069249 -0.592599 -1.446526 0.373367 0.593400 5.400000
1.937112 -0.641509 -1.371522 0.335652 0.593400 5.400000
1.810400 -0.683184 -1.296520 0.299945 0.593400 5.400000
1.689517 -0.718354 -1.221524 0.266252 0.593400 5.400000
1.574809 -0.747697 -1.146520 0.234560 0.593400 5.400000
1.466576 -0.771862 -1.071525 0.204874 0.593400 5.400000
1.365056 -0.791494 -0.996521 0.177200 0.593400 5.400000
1.270453 -0.807184 -0.921524 0.151530 0.593400 5.400000
1.182915 -0.819501 -0.846523 0.127867 0.593400 5.400000
1.102562 -0.828945 -0.771523 0.106214 0.593400 5.400000
1.029503 -0.836011 -0.696526 0.086564 0.593400 5.400000
0.963802 -0.841127 -0.621522 0.068928 0.593400 5.400000
0.905504 -0.844691 -0.546527 0.053295 0.593400 5.400000
0.854661 -0.847057 -0.471523 0.039675 0.593400 5.400000
0.811283 -0.848532 -0.396528 0.028058 0.593400 5.400000
0.775385 -0.849363 -0.321525 0.018445 0.593400 5.400000
0.746989 -0.849782 -0.246527 0.010845 0.593400 5.400000
0.726091 -0.849944 -0.171527 0.005249 0.593400 5.400000
0.712694 -0.849994 -0.096526 0.001662 0.593400 5.400000
