# Supplementary material for: Automatic Parking Controller with a Twin Artificial Neural Network Architecture
Source: Hindawi journal article supplement (doi:10.1155/2019/4801985), 2019-01-01
Supplement: f1 [file 4801985.f1.zip › data/data_16.txt]

6.500000 1.100000 0.000000 0.000000 0.000000 5.400000
6.496257 1.100000 -0.075000 0.000045 -0.029071 5.400000
6.485027 1.099999 -0.150001 0.000327 -0.066412 5.400000
6.466235 1.099982 -0.224999 0.001079 -0.103603 5.400000
6.440006 1.099939 -0.300001 0.002510 -0.140794 5.400000
6.406255 1.099817 -0.375002 0.004852 -0.177959 5.400000
6.364996 1.099550 -0.449999 0.008356 -0.215077 5.400000
6.316258 1.099028 -0.525002 0.013236 -0.252084 5.400000
6.260015 1.098096 -0.600002 0.019763 -0.288914 5.400000
6.196278 1.096577 -0.674998 0.028182 -0.325448 5.400000
6.125071 1.094208 -0.750003 0.038737 -0.361564 5.400000
6.046401 1.090653 -0.825001 0.051711 -0.396202 5.400000
5.960302 1.085537 -0.900003 0.067206 -0.421419 5.400000
5.866830 1.078411 -0.975004 0.085169 -0.446125 5.400000
5.766030 1.068768 -1.050001 0.105827 -0.470852 5.400000
5.658040 1.056026 -1.125004 0.129360 -0.495567 5.400000
5.542967 1.039515 -1.200004 0.156035 -0.520283 5.400000
5.421024 1.018471 -1.275000 0.185906 -0.537940 5.400000
5.292448 0.992161 -1.350005 0.217843 -0.534026 5.400000
5.157493 0.959922 -1.425004 0.250810 -0.519300 5.400000
5.016462 0.921261 -1.499999 0.284118 -0.498526 5.400000
4.869621 0.875702 -1.575006 0.317307 -0.474478 5.400000
4.717280 0.822848 -1.650004 0.350068 -0.449030 5.400000
4.559738 0.762415 -1.724999 0.382216 -0.423270 5.400000
4.397271 0.694090 -1.800006 0.413618 -0.397827 5.400000
4.230186 0.617641 -1.875003 0.444183 -0.373156 5.400000
4.058746 0.532872 -1.951773 0.473884 -0.349770 5.400000
3.883592 0.439799 -1.989991 0.502499 -0.323008 5.400000
3.709668 0.341200 -2.000000 0.528258 -0.278892 5.400000
3.538001 0.238584 -2.000000 0.548073 -0.198288 5.400000
3.367992 0.133240 -2.000000 0.559950 -0.097479 5.400000
3.198793 0.026594 -1.994833 0.563402 0.002519 5.400000
3.032396 -0.078256 -1.929382 0.559591 0.102517 5.400000
2.871555 -0.177867 -1.854382 0.548053 0.202519 5.400000
2.715669 -0.271176 -1.779379 0.529481 0.302523 5.400000
2.564287 -0.357346 -1.704382 0.504032 0.402524 5.400000
2.417113 -0.435583 -1.629381 0.471877 0.502522 5.400000
2.273966 -0.505293 -1.555122 0.433009 0.593400 5.400000
2.134713 -0.566231 -1.482666 0.392255 0.593400 5.400000
2.000135 -0.618883 -1.407661 0.353574 0.593400 5.400000
1.870754 -0.663955 -1.332666 0.316907 0.593400 5.400000
1.747012 -0.702180 -1.257662 0.282234 0.593400 5.400000
1.629290 -0.734243 -1.182665 0.249584 0.593400 5.400000
1.517907 -0.760822 -1.107665 0.218927 0.593400 5.400000
1.413128 -0.782563 -1.032664 0.190283 0.593400 5.400000
1.315168 -0.800085 -0.957667 0.163649 0.593400 5.400000
1.224201 -0.813958 -0.882664 0.139023 0.593400 5.400000
1.140382 -0.824723 -0.807669 0.116399 0.593400 5.400000
1.063799 -0.832872 -0.732664 0.095789 0.593400 5.400000
0.994539 -0.838874 -0.657669 0.077182 0.593400 5.400000
0.932674 -0.843147 -0.582666 0.060580 0.593400 5.400000
0.878233 -0.846051 -0.507668 0.045990 0.593400 5.400000
0.831259 -0.847914 -0.432669 0.033403 0.593400 5.400000
0.791753 -0.849022 -0.357667 0.022827 0.593400 5.400000
0.759743 -0.849623 -0.282671 0.014258 0.593400 5.400000
0.735232 -0.849892 -0.207667 0.007691 0.593400 5.400000
0.718209 -0.849979 -0.132672 0.003137 0.593400 5.400000
