# Supplementary material for: Automatic Parking Controller with a Twin Artificial Neural Network Architecture
Source: Hindawi journal article supplement (doi:10.1155/2019/4801985), 2019-01-01
Supplement: f1 [file 4801985.f1.zip › data/data_17.txt]

6.600000 1.100000 0.000000 0.000000 0.000000 5.400000
6.596262 1.100000 -0.074998 0.000043 -0.025731 5.400000
6.585025 1.099999 -0.149997 0.000302 -0.060450 5.400000
6.566240 1.099982 -0.225003 0.001003 -0.094904 5.400000
6.540009 1.099943 -0.300000 0.002332 -0.129294 5.400000
6.506249 1.099828 -0.374998 0.004518 -0.163546 5.400000
6.464996 1.099578 -0.450002 0.007755 -0.197600 5.400000
6.416256 1.099091 -0.525003 0.012267 -0.231358 5.400000
6.360005 1.098234 -0.600001 0.018277 -0.264704 5.400000
6.296275 1.096835 -0.674998 0.025993 -0.297534 5.400000
6.225060 1.094645 -0.749996 0.035622 -0.328700 5.400000
6.146374 1.091385 -0.825004 0.047305 -0.353580 5.400000
6.060260 1.086733 -0.900001 0.061062 -0.378286 5.400000
5.966723 1.080265 -0.974999 0.077111 -0.403014 5.400000
5.865851 1.071547 -1.049996 0.095619 -0.427730 5.400000
5.757725 1.060035 -1.125004 0.116813 -0.452454 5.400000
5.642428 1.045106 -1.200001 0.140864 -0.475129 5.400000
5.520157 1.026127 -1.274999 0.167432 -0.485801 5.400000
5.391062 1.002401 -1.349996 0.196026 -0.489082 5.400000
5.255402 0.973327 -1.425005 0.226212 -0.485891 5.400000
5.113419 0.938298 -1.500002 0.257526 -0.477090 5.400000
4.965391 0.896744 -1.574999 0.289574 -0.464367 5.400000
4.811642 0.848194 -1.649997 0.322040 -0.449257 5.400000
4.652464 0.792154 -1.725004 0.354687 -0.433047 5.400000
4.488230 0.728237 -1.800002 0.387388 -0.416784 5.400000
4.319264 0.656040 -1.875000 0.420078 -0.401322 5.400000
4.145951 0.575170 -1.950800 0.452797 -0.387639 5.400000
3.969158 0.485545 -2.000000 0.485355 -0.371271 5.400000
3.793661 0.389488 -2.000000 0.515440 -0.327176 5.400000
3.620912 0.288715 -2.000000 0.539422 -0.245258 5.400000
3.450191 0.184526 -2.000000 0.555162 -0.145916 5.400000
3.280699 0.078326 -2.000000 0.563010 -0.045919 5.400000
3.112302 -0.028024 -1.968761 0.562699 0.054077 5.400000
2.948816 -0.130343 -1.890709 0.554529 0.154084 5.400000
2.790592 -0.226826 -1.815712 0.539342 0.254081 5.400000
2.637076 -0.316540 -1.740713 0.517209 0.354078 5.400000
2.487886 -0.398719 -1.665706 0.488292 0.454083 5.400000
2.342837 -0.472580 -1.590415 0.452598 0.559437 5.400000
2.201618 -0.537794 -1.519084 0.411713 0.593400 5.400000
2.064712 -0.594373 -1.443998 0.372065 0.593400 5.400000
1.932750 -0.643027 -1.368993 0.334415 0.593400 5.400000
1.806229 -0.684472 -1.293993 0.298776 0.593400 5.400000
1.685548 -0.719433 -1.218996 0.265151 0.593400 5.400000
1.571055 -0.748592 -1.143992 0.233527 0.593400 5.400000
1.463045 -0.772594 -1.068997 0.203908 0.593400 5.400000
1.361754 -0.792083 -0.993993 0.176303 0.593400 5.400000
1.267388 -0.807651 -0.918997 0.150700 0.593400 5.400000
1.180089 -0.819863 -0.843995 0.127104 0.593400 5.400000
1.099981 -0.829219 -0.768996 0.105519 0.593400 5.400000
1.027169 -0.836213 -0.693998 0.085937 0.593400 5.400000
0.961716 -0.841271 -0.618995 0.068369 0.593400 5.400000
0.903669 -0.844788 -0.544000 0.052803 0.593400 5.400000
0.853078 -0.847119 -0.468995 0.039251 0.593400 5.400000
0.809951 -0.848569 -0.394000 0.027702 0.593400 5.400000
0.774305 -0.849383 -0.318997 0.018156 0.593400 5.400000
0.746162 -0.849791 -0.244000 0.010625 0.593400 5.400000
0.725514 -0.849947 -0.168999 0.005095 0.593400 5.400000
0.712370 -0.849995 -0.093999 0.001575 0.593400 5.400000
