# Supplementary material for: Automatic Parking Controller with a Twin Artificial Neural Network Architecture
Source: Hindawi journal article supplement (doi:10.1155/2019/4801985), 2019-01-01
Supplement: f1 [file 4801985.f1.zip › data/data_18.txt]

6.700000 1.100000 0.000000 0.000000 0.000000 5.400000
6.696274 1.100000 -0.075001 0.000041 -0.022239 5.400000
6.685027 1.099999 -0.150002 0.000290 -0.054257 5.400000
6.666236 1.099983 -0.225002 0.000931 -0.085913 5.400000
6.640008 1.099947 -0.300003 0.002159 -0.117440 5.400000
6.606242 1.099838 -0.375004 0.004166 -0.148753 5.400000
6.565002 1.099610 -0.450005 0.007146 -0.179765 5.400000
6.516257 1.099168 -0.524995 0.011282 -0.210362 5.400000
6.460002 1.098377 -0.599996 0.016770 -0.240654 5.400000
6.396280 1.097092 -0.674997 0.023789 -0.267458 5.400000
6.325043 1.095091 -0.749998 0.032422 -0.292108 5.400000
6.246356 1.092141 -0.824999 0.042820 -0.316829 5.400000
6.160210 1.087926 -0.900000 0.055154 -0.341549 5.400000
6.066642 1.082090 -0.975000 0.069608 -0.366268 5.400000
5.965706 1.074215 -1.050001 0.086367 -0.391029 5.400000
5.857447 1.063804 -1.125002 0.105594 -0.413342 5.400000
5.741989 1.050318 -1.200003 0.127140 -0.428925 5.400000
5.619431 1.033180 -1.275003 0.150883 -0.440480 5.400000
5.489935 1.011791 -1.350004 0.176632 -0.447767 5.400000
5.353704 0.985544 -1.425005 0.204184 -0.450766 5.400000
5.210941 0.953803 -1.499999 0.233277 -0.450130 5.400000
5.061921 0.916004 -1.574997 0.263672 -0.446405 5.400000
4.906928 0.871518 -1.649997 0.295153 -0.440647 5.400000
4.746305 0.819828 -1.724998 0.327570 -0.433954 5.400000
4.580396 0.760342 -1.799999 0.360853 -0.427382 5.400000
4.409626 0.692534 -1.875000 0.395027 -0.422018 5.400000
4.234430 0.615850 -1.950913 0.430228 -0.419148 5.400000
4.055741 0.529881 -1.995757 0.466426 -0.413124 5.400000
3.878702 0.436848 -2.000000 0.500606 -0.374241 5.400000
3.704685 0.338279 -2.000000 0.528737 -0.294000 5.400000
3.533073 0.235569 -2.000000 0.548562 -0.194556 5.400000
3.363093 0.130181 -2.000000 0.560088 -0.094561 5.400000
3.193799 0.023428 -1.993255 0.563385 0.005442 5.400000
3.027622 -0.081239 -1.927194 0.559417 0.105441 5.400000
2.866941 -0.180685 -1.852193 0.547597 0.205436 5.400000
2.711186 -0.273801 -1.777192 0.528828 0.305443 5.400000
2.559925 -0.359730 -1.702191 0.503196 0.405438 5.400000
2.412870 -0.437745 -1.627191 0.470838 0.505440 5.400000
2.269838 -0.507200 -1.553244 0.431796 0.593400 5.400000
2.130714 -0.567882 -1.480476 0.391097 0.593400 5.400000
1.996281 -0.620303 -1.405471 0.352475 0.593400 5.400000
1.867059 -0.665164 -1.330476 0.315867 0.593400 5.400000
1.743487 -0.703200 -1.255472 0.281252 0.593400 5.400000
1.625947 -0.735094 -1.180476 0.248661 0.593400 5.400000
1.514752 -0.761523 -1.105474 0.218062 0.593400 5.400000
1.410170 -0.783132 -1.030475 0.189477 0.593400 5.400000
1.312412 -0.800538 -0.955476 0.162901 0.593400 5.400000
1.221652 -0.814313 -0.880474 0.138334 0.593400 5.400000
1.138043 -0.824995 -0.805478 0.115769 0.593400 5.400000
1.061672 -0.833075 -0.730474 0.095217 0.593400 5.400000
0.992628 -0.839021 -0.655479 0.076669 0.593400 5.400000
0.930980 -0.843249 -0.580476 0.060126 0.593400 5.400000
0.876756 -0.846120 -0.505478 0.045594 0.593400 5.400000
0.829999 -0.847957 -0.430478 0.033066 0.593400 5.400000
0.790712 -0.849045 -0.355477 0.022548 0.593400 5.400000
0.758921 -0.849635 -0.280480 0.014037 0.593400 5.400000
0.734630 -0.849896 -0.205477 0.007529 0.593400 5.400000
0.717828 -0.849980 -0.130482 0.003035 0.593400 5.400000
