# Supplementary material for: Automatic Parking Controller with a Twin Artificial Neural Network Architecture
Source: Hindawi journal article supplement (doi:10.1155/2019/4801985), 2019-01-01
Supplement: f1 [file 4801985.f1.zip › data/data_19.txt]

6.800000 1.100000 0.000000 0.000000 0.000000 5.400000
6.796283 1.100000 -0.074999 0.000035 -0.018785 5.400000
6.785023 1.100000 -0.149999 0.000269 -0.048108 5.400000
6.766236 1.099984 -0.224998 0.000857 -0.077023 5.400000
6.740017 1.099952 -0.299998 0.001986 -0.105763 5.400000
6.706243 1.099858 -0.374997 0.003824 -0.134234 5.400000
6.665005 1.099643 -0.449996 0.006546 -0.162375 5.400000
6.616246 1.099238 -0.524996 0.010312 -0.188145 5.400000
6.560007 1.098516 -0.600006 0.015244 -0.212869 5.400000
6.496273 1.097353 -0.675005 0.021498 -0.237581 5.400000
6.425036 1.095552 -0.750004 0.029222 -0.262305 5.400000
6.346343 1.092890 -0.825004 0.038607 -0.287027 5.400000
6.260169 1.089087 -0.900003 0.049803 -0.311753 5.400000
6.166567 1.083809 -0.975002 0.062994 -0.335673 5.400000
6.065572 1.076674 -1.050002 0.078207 -0.355308 5.400000
5.957234 1.067254 -1.125001 0.095450 -0.372736 5.400000
5.841627 1.055069 -1.200001 0.114748 -0.387669 5.400000
5.718843 1.039600 -1.275000 0.136063 -0.399930 5.400000
5.589029 1.020302 -1.349999 0.159325 -0.409418 5.400000
5.452318 0.996573 -1.424999 0.184442 -0.416263 5.400000
5.308934 0.967841 -1.499998 0.211296 -0.420749 5.400000
5.159072 0.933455 -1.574998 0.239781 -0.423438 5.400000
5.003035 0.892826 -1.649997 0.269809 -0.425052 5.400000
4.841126 0.845285 -1.725006 0.301352 -0.426513 5.400000
4.673711 0.790206 -1.800006 0.334469 -0.428915 5.400000
4.501233 0.726888 -1.875005 0.369328 -0.433593 5.400000
4.324171 0.654582 -1.951266 0.406278 -0.442838 5.400000
4.143621 0.572694 -1.999921 0.445465 -0.449834 5.400000
3.964814 0.482992 -2.000000 0.483750 -0.416035 5.400000
3.789350 0.387045 -2.000000 0.515876 -0.338010 5.400000
3.616663 0.286163 -2.000000 0.539930 -0.243461 5.400000
3.445986 0.181912 -2.000000 0.555492 -0.143433 5.400000
3.276519 0.075692 -1.999976 0.562870 -0.043428 5.400000
3.108170 -0.030637 -1.965459 0.562406 0.056566 5.400000
2.944813 -0.132814 -1.888840 0.554287 0.156571 5.400000
2.786716 -0.229145 -1.813841 0.538856 0.256567 5.400000
2.633307 -0.318680 -1.738841 0.516572 0.356570 5.400000
2.484229 -0.400656 -1.663842 0.487488 0.456574 5.400000
2.339281 -0.474306 -1.588478 0.451609 0.563191 5.400000
2.198153 -0.539304 -1.517180 0.410700 0.593400 5.400000
2.061364 -0.595678 -1.442130 0.371103 0.593400 5.400000
1.929531 -0.644144 -1.367125 0.333503 0.593400 5.400000
1.803151 -0.685419 -1.292126 0.297915 0.593400 5.400000
1.682620 -0.720227 -1.217128 0.264340 0.593400 5.400000
1.568286 -0.749249 -1.142125 0.232765 0.593400 5.400000
1.460441 -0.773131 -1.067130 0.203197 0.593400 5.400000
1.359320 -0.792516 -0.992125 0.175641 0.593400 5.400000
1.265128 -0.807993 -0.917130 0.150089 0.593400 5.400000
1.178007 -0.820129 -0.842127 0.126542 0.593400 5.400000
1.098080 -0.829421 -0.767129 0.105007 0.593400 5.400000
1.025450 -0.836360 -0.692130 0.085475 0.593400 5.400000
0.960180 -0.841376 -0.617128 0.067957 0.593400 5.400000
0.902318 -0.844859 -0.542132 0.052441 0.593400 5.400000
0.851915 -0.847164 -0.467128 0.038939 0.593400 5.400000
0.808973 -0.848596 -0.392133 0.027440 0.593400 5.400000
0.773514 -0.849398 -0.317129 0.017944 0.593400 5.400000
0.745556 -0.849797 -0.242133 0.010463 0.593400 5.400000
0.725094 -0.849949 -0.167131 0.004984 0.593400 5.400000
0.712137 -0.849996 -0.092132 0.001512 0.593400 5.400000
