# Supplementary material for: Automatic Parking Controller with a Twin Artificial Neural Network Architecture
Source: Hindawi journal article supplement (doi:10.1155/2019/4801985), 2019-01-01
Supplement: f1 [file 4801985.f1.zip › data/data_20.txt]

6.900000 1.100000 0.000000 0.000000 0.000000 5.400000
6.896289 1.100000 -0.075001 0.000034 -0.015920 5.400000
6.885013 1.100000 -0.150002 0.000249 -0.042217 5.400000
6.866243 1.099984 -0.224997 0.000788 -0.068070 5.400000
6.840016 1.099955 -0.300004 0.001815 -0.092979 5.400000
6.806245 1.099866 -0.374999 0.003465 -0.117704 5.400000
6.765010 1.099678 -0.449997 0.005896 -0.142424 5.400000
6.716241 1.099312 -0.525000 0.009262 -0.167136 5.400000
6.660010 1.098665 -0.599999 0.013699 -0.191849 5.400000
6.596258 1.097619 -0.675002 0.019402 -0.216480 5.400000
6.525036 1.095988 -0.749997 0.026479 -0.240211 5.400000
6.446320 1.093568 -0.825003 0.035068 -0.262200 5.400000
6.360138 1.090113 -0.899998 0.045257 -0.283035 5.400000
6.266520 1.085330 -0.975005 0.057141 -0.302507 5.400000
6.165471 1.078864 -1.050001 0.070809 -0.320457 5.400000
6.057057 1.070334 -1.124997 0.086313 -0.336712 5.400000
5.941327 1.059314 -1.200002 0.103673 -0.351156 5.400000
5.818377 1.045344 -1.274998 0.122912 -0.363732 5.400000
5.688289 1.027885 -1.350002 0.144009 -0.374483 5.400000
5.551216 1.006416 -1.424999 0.166932 -0.383578 5.400000
5.407307 0.980335 -1.500004 0.191659 -0.391308 5.400000
5.256783 0.949064 -1.575001 0.218177 -0.398180 5.400000
5.099864 0.911951 -1.649996 0.246495 -0.404844 5.400000
4.936860 0.868319 -1.725003 0.276695 -0.412193 5.400000
4.768115 0.817459 -1.799998 0.308948 -0.421375 5.400000
4.594056 0.758592 -1.875004 0.343570 -0.434010 5.400000
4.415222 0.690838 -1.950620 0.381123 -0.452897 5.400000
4.232733 0.613375 -1.999013 0.422036 -0.470901 5.400000
4.052009 0.527641 -2.000000 0.463892 -0.469710 5.400000
3.874901 0.434725 -2.000000 0.500925 -0.390164 5.400000
3.700933 0.336094 -2.000000 0.529226 -0.292420 5.400000
3.529366 0.233296 -2.000000 0.548909 -0.192416 5.400000
3.359414 0.127872 -2.000000 0.560305 -0.092422 5.400000
3.190214 0.021168 -1.991930 0.563617 0.007583 5.400000
3.024131 -0.083435 -1.926064 0.559218 0.107577 5.400000
2.863553 -0.182739 -1.850588 0.547294 0.207582 5.400000
2.707904 -0.275718 -1.775582 0.528340 0.307582 5.400000
2.556740 -0.361481 -1.700587 0.502585 0.407580 5.400000
2.409766 -0.439325 -1.625584 0.470071 0.507582 5.400000
2.266815 -0.508592 -1.551880 0.430904 0.593400 5.400000
2.127787 -0.569089 -1.478871 0.390249 0.593400 5.400000
1.993460 -0.621339 -1.403866 0.351670 0.593400 5.400000
1.864355 -0.666047 -1.328871 0.315105 0.593400 5.400000
1.740908 -0.703944 -1.253867 0.280533 0.593400 5.400000
1.623500 -0.735715 -1.178871 0.247985 0.593400 5.400000
1.512444 -0.762034 -1.103869 0.217430 0.593400 5.400000
1.408006 -0.783546 -1.028870 0.188887 0.593400 5.400000
1.310395 -0.800869 -0.953871 0.162354 0.593400 5.400000
1.219788 -0.814572 -0.878869 0.137830 0.593400 5.400000
1.136332 -0.825193 -0.803873 0.115308 0.593400 5.400000
1.060118 -0.833223 -0.728869 0.094800 0.593400 5.400000
0.991231 -0.839128 -0.653874 0.076294 0.593400 5.400000
0.929742 -0.843323 -0.578870 0.059794 0.593400 5.400000
0.875677 -0.846169 -0.503874 0.045305 0.593400 5.400000
0.829079 -0.847988 -0.428873 0.032820 0.593400 5.400000
0.789952 -0.849062 -0.353873 0.022344 0.593400 5.400000
0.758322 -0.849644 -0.278875 0.013877 0.593400 5.400000
0.734193 -0.849899 -0.203872 0.007412 0.593400 5.400000
0.717552 -0.849981 -0.128877 0.002961 0.593400 5.400000
