# Supplementary material for: Automatic Parking Controller with a Twin Artificial Neural Network Architecture
Source: Hindawi journal article supplement (doi:10.1155/2019/4801985), 2019-01-01
Supplement: f1 [file 4801985.f1.zip › data/data_21.txt]

7.000000 1.100000 0.000000 0.000000 0.000000 5.400000
6.996296 1.100000 -0.075004 0.000033 -0.012120 5.400000
6.985008 1.100000 -0.149997 0.000219 -0.034767 5.400000
6.966250 1.099996 -0.225001 0.000694 -0.058518 5.400000
6.940006 1.099957 -0.300004 0.001615 -0.082095 5.400000
6.906247 1.099881 -0.374998 0.003115 -0.105417 5.400000
6.865008 1.099708 -0.450002 0.005320 -0.128393 5.400000
6.816251 1.099379 -0.524998 0.008383 -0.150954 5.400000
6.760011 1.098797 -0.599999 0.012425 -0.172979 5.400000
6.696260 1.097843 -0.675003 0.017578 -0.194388 5.400000
6.625031 1.096368 -0.749996 0.023941 -0.215041 5.400000
6.546301 1.094187 -0.825000 0.031650 -0.234856 5.400000
6.460114 1.091069 -0.900004 0.040788 -0.253678 5.400000
6.366460 1.086754 -0.974998 0.051454 -0.271434 5.400000
6.265389 1.080938 -1.050001 0.063712 -0.287997 5.400000
6.156898 1.073261 -1.125005 0.077632 -0.303309 5.400000
6.041079 1.063357 -1.199997 0.093257 -0.317348 5.400000
5.917970 1.050770 -1.275002 0.110615 -0.330141 5.400000
5.787668 1.035044 -1.350001 0.129743 -0.341804 5.400000
5.650278 1.015671 -1.424999 0.150661 -0.352540 5.400000
5.505948 0.992090 -1.500003 0.173389 -0.362696 5.400000
5.354840 0.963710 -1.574996 0.197999 -0.372746 5.400000
5.197176 0.929910 -1.650000 0.224584 -0.383347 5.400000
5.033224 0.889991 -1.725003 0.253315 -0.395422 5.400000
4.863303 0.843193 -1.800001 0.284452 -0.410543 5.400000
4.687852 0.788663 -1.875001 0.318677 -0.433805 5.400000
4.507371 0.725350 -1.951744 0.356596 -0.458521 5.400000
4.323064 0.652327 -1.998366 0.398371 -0.483622 5.400000
4.140465 0.570698 -2.000000 0.442699 -0.494521 5.400000
3.961597 0.481255 -2.000000 0.483558 -0.430455 5.400000
3.786173 0.385222 -2.000000 0.516442 -0.342012 5.400000
3.613510 0.284291 -2.000000 0.540261 -0.241613 5.400000
3.442876 0.179971 -2.000000 0.555734 -0.141611 5.400000
3.273376 0.073717 -1.999145 0.562835 -0.041613 5.400000
3.105127 -0.032560 -1.961845 0.562246 0.058388 5.400000
2.941895 -0.134621 -1.887477 0.554073 0.158394 5.400000
2.783885 -0.230840 -1.812480 0.538512 0.258387 5.400000
2.630555 -0.320247 -1.737476 0.516104 0.358393 5.400000
2.481553 -0.402071 -1.662482 0.486902 0.458387 5.400000
2.336685 -0.475557 -1.587059 0.450881 0.566001 5.400000
2.195622 -0.540405 -1.515794 0.409962 0.593400 5.400000
2.058919 -0.596629 -1.440765 0.370402 0.593400 5.400000
1.927181 -0.644958 -1.365760 0.332838 0.593400 5.400000
1.800903 -0.686109 -1.290761 0.297286 0.593400 5.400000
1.680482 -0.720804 -1.215763 0.263747 0.593400 5.400000
1.566265 -0.749727 -1.140760 0.232209 0.593400 5.400000
1.458540 -0.773522 -1.065765 0.202677 0.593400 5.400000
1.357543 -0.792831 -0.990760 0.175158 0.593400 5.400000
1.263479 -0.808242 -0.915765 0.149642 0.593400 5.400000
1.176488 -0.820323 -0.840762 0.126132 0.593400 5.400000
1.096692 -0.829567 -0.765765 0.104634 0.593400 5.400000
1.024197 -0.836467 -0.690764 0.085138 0.593400 5.400000
0.959060 -0.841452 -0.615764 0.067657 0.593400 5.400000
0.901334 -0.844911 -0.540767 0.052178 0.593400 5.400000
0.851067 -0.847197 -0.465763 0.038711 0.593400 5.400000
0.808262 -0.848615 -0.390768 0.027250 0.593400 5.400000
0.772938 -0.849409 -0.315764 0.017791 0.593400 5.400000
0.745117 -0.849801 -0.240768 0.010346 0.593400 5.400000
0.724790 -0.849951 -0.165766 0.004903 0.593400 5.400000
0.711969 -0.849996 -0.090767 0.001467 0.593400 5.400000
