# Supplementary material for: Automatic Parking Controller with a Twin Artificial Neural Network Architecture
Source: Hindawi journal article supplement (doi:10.1155/2019/4801985), 2019-01-01
Supplement: f1 [file 4801985.f1.zip › data/data_22.txt]

7.100000 1.100000 0.000000 0.000000 0.000000 5.400000
7.096305 1.100000 -0.074998 0.000028 -0.010011 5.400000
7.085006 1.100000 -0.149995 0.000192 -0.029685 5.400000
7.066254 1.099996 -0.224998 0.000626 -0.050898 5.400000
7.040006 1.099969 -0.300001 0.001456 -0.071916 5.400000
7.006248 1.099898 -0.374999 0.002797 -0.092709 5.400000
6.965001 1.099735 -0.449996 0.004774 -0.113206 5.400000
6.916252 1.099442 -0.524999 0.007508 -0.133319 5.400000
6.860003 1.098920 -0.600001 0.011116 -0.152976 5.400000
6.796256 1.098068 -0.675000 0.015704 -0.172106 5.400000
6.725022 1.096759 -0.749997 0.021383 -0.190610 5.400000
6.646292 1.094806 -0.824999 0.028250 -0.208437 5.400000
6.560099 1.092018 -0.900002 0.036401 -0.225501 5.400000
6.466422 1.088173 -0.975001 0.045908 -0.241741 5.400000
6.365306 1.082978 -1.049998 0.056856 -0.257128 5.400000
6.256769 1.076136 -1.125000 0.069306 -0.271647 5.400000
6.140860 1.067282 -1.200003 0.083310 -0.285332 5.400000
6.017623 1.056023 -1.275001 0.098937 -0.298276 5.400000
5.887141 1.041951 -1.349999 0.116230 -0.310634 5.400000
5.749476 1.024552 -1.425000 0.135263 -0.322645 5.400000
5.604789 1.003346 -1.500004 0.156104 -0.334682 5.400000
5.453179 0.977722 -1.574995 0.178862 -0.347205 5.400000
5.294874 0.947089 -1.649999 0.203705 -0.361050 5.400000
5.130091 0.910716 -1.724998 0.231116 -0.382649 5.400000
4.959174 0.867765 -1.799995 0.261720 -0.407545 5.400000
4.782503 0.817240 -1.874996 0.295812 -0.432263 5.400000
4.600641 0.758094 -1.950718 0.333612 -0.456978 5.400000
4.414716 0.689342 -1.998928 0.375238 -0.481698 5.400000
4.230244 0.611960 -2.000000 0.419763 -0.504345 5.400000
4.049506 0.526353 -2.000000 0.464071 -0.475134 5.400000
3.872443 0.433396 -2.000000 0.501381 -0.391985 5.400000
3.698511 0.334665 -2.000000 0.529606 -0.290986 5.400000
3.526969 0.231843 -2.000000 0.549078 -0.190992 5.400000
3.357042 0.126373 -2.000000 0.560468 -0.090985 5.400000
3.187937 0.019744 -1.995874 0.563577 0.009009 5.400000
3.021804 -0.084899 -1.924873 0.559048 0.109007 5.400000
2.861288 -0.184112 -1.849513 0.547091 0.209010 5.400000
2.705713 -0.277010 -1.774512 0.528006 0.309007 5.400000
2.554601 -0.362650 -1.699508 0.502172 0.409010 5.400000
2.407696 -0.440381 -1.624509 0.469554 0.509008 5.400000
2.264796 -0.509520 -1.550972 0.430308 0.593400 5.400000
2.125832 -0.569893 -1.477799 0.389684 0.593400 5.400000
1.991576 -0.622030 -1.402794 0.351133 0.593400 5.400000
1.862549 -0.666635 -1.327799 0.314597 0.593400 5.400000
1.739186 -0.704440 -1.252794 0.280053 0.593400 5.400000
1.621866 -0.736129 -1.177799 0.247534 0.593400 5.400000
1.510903 -0.762374 -1.102796 0.217007 0.593400 5.400000
1.406561 -0.783822 -1.027798 0.188494 0.593400 5.400000
1.309050 -0.801089 -0.952798 0.161989 0.593400 5.400000
1.218544 -0.814744 -0.877797 0.137494 0.593400 5.400000
1.135191 -0.825325 -0.802801 0.115001 0.593400 5.400000
1.059081 -0.833322 -0.727797 0.094521 0.593400 5.400000
0.990299 -0.839199 -0.652802 0.076044 0.593400 5.400000
0.928917 -0.843373 -0.577798 0.059572 0.593400 5.400000
0.874959 -0.846202 -0.502802 0.045113 0.593400 5.400000
0.828467 -0.848008 -0.427800 0.032656 0.593400 5.400000
0.789446 -0.849074 -0.352801 0.022208 0.593400 5.400000
0.757923 -0.849649 -0.277802 0.013770 0.593400 5.400000
0.733902 -0.849901 -0.202800 0.007334 0.593400 5.400000
0.717370 -0.849981 -0.127804 0.002912 0.593400 5.400000
