# Supplementary material for: Automatic Parking Controller with a Twin Artificial Neural Network Architecture
Source: Hindawi journal article supplement (doi:10.1155/2019/4801985), 2019-01-01
Supplement: f1 [file 4801985.f1.zip › data/data_23.txt]

7.200000 1.100000 0.000000 0.000000 0.000000 5.400000
7.196303 1.100000 -0.075000 0.000028 -0.008338 5.400000
7.184989 1.100000 -0.150000 0.000176 -0.024949 5.400000
7.166257 1.099997 -0.225000 0.000561 -0.043769 5.400000
7.139994 1.099971 -0.300001 0.001298 -0.062431 5.400000
7.106252 1.099903 -0.375000 0.002495 -0.080888 5.400000
7.065000 1.099769 -0.450001 0.004254 -0.099094 5.400000
7.016256 1.099501 -0.525000 0.006687 -0.116977 5.400000
6.959996 1.099041 -0.600001 0.009903 -0.134499 5.400000
6.896261 1.098277 -0.675000 0.013979 -0.151578 5.400000
6.825010 1.097102 -0.750002 0.019035 -0.168189 5.400000
6.746289 1.095377 -0.825000 0.025145 -0.184254 5.400000
6.660071 1.092899 -0.900002 0.032397 -0.199758 5.400000
6.566385 1.089470 -0.975000 0.040865 -0.214679 5.400000
6.465235 1.084848 -1.050002 0.050634 -0.229009 5.400000
6.356668 1.078746 -1.124997 0.061764 -0.242779 5.400000
6.240682 1.070853 -1.200001 0.074326 -0.256062 5.400000
6.117341 1.060804 -1.274998 0.088393 -0.268985 5.400000
5.986699 1.048207 -1.350001 0.104034 -0.281719 5.400000
5.848833 1.032622 -1.424998 0.121338 -0.294538 5.400000
5.703823 1.013540 -1.500001 0.140416 -0.307792 5.400000
5.551828 0.990452 -1.574998 0.161409 -0.322356 5.400000
5.392986 0.962696 -1.650001 0.184824 -0.344931 5.400000
5.227536 0.929542 -1.724999 0.211175 -0.369747 5.400000
5.055754 0.890092 -1.800001 0.240728 -0.394468 5.400000
4.878055 0.843400 -1.874999 0.273677 -0.419935 5.400000
4.694882 0.788370 -1.951747 0.310575 -0.451502 5.400000
4.507384 0.723974 -1.998437 0.351704 -0.476580 5.400000
4.321151 0.651002 -2.000000 0.395735 -0.501301 5.400000
4.138455 0.569693 -2.000000 0.442129 -0.522027 5.400000
3.959605 0.480198 -2.000000 0.484033 -0.437290 5.400000
3.784207 0.384125 -2.000000 0.516734 -0.340456 5.400000
3.611583 0.283121 -2.000000 0.540515 -0.240458 5.400000
3.440954 0.178793 -2.000000 0.555786 -0.140459 5.400000
3.271472 0.072508 -2.000000 0.563021 -0.040461 5.400000
3.103198 -0.033759 -1.962082 0.562336 0.059538 5.400000
2.940048 -0.135768 -1.886613 0.553911 0.159536 5.400000
2.782089 -0.231901 -1.811619 0.538310 0.259535 5.400000
2.628823 -0.321237 -1.736613 0.515794 0.359544 5.400000
2.479866 -0.402967 -1.661618 0.486525 0.459542 5.400000
2.335043 -0.476349 -1.586151 0.450422 0.567883 5.400000
2.194023 -0.541099 -1.514920 0.409495 0.593400 5.400000
2.057375 -0.597228 -1.439902 0.369959 0.593400 5.400000
1.925697 -0.645470 -1.364897 0.332417 0.593400 5.400000
1.799484 -0.686544 -1.289899 0.296889 0.593400 5.400000
1.679132 -0.721168 -1.214900 0.263373 0.593400 5.400000
1.564989 -0.750029 -1.139898 0.231857 0.593400 5.400000
1.457340 -0.773768 -1.064902 0.202349 0.593400 5.400000
1.356422 -0.793029 -0.989898 0.174854 0.593400 5.400000
1.262438 -0.808399 -0.914903 0.149361 0.593400 5.400000
1.175529 -0.820444 -0.839899 0.125873 0.593400 5.400000
1.095817 -0.829659 -0.764903 0.104398 0.593400 5.400000
1.023406 -0.836534 -0.689901 0.084926 0.593400 5.400000
0.958353 -0.841500 -0.614901 0.067467 0.593400 5.400000
0.900713 -0.844943 -0.539904 0.052012 0.593400 5.400000
0.850532 -0.847217 -0.464901 0.038568 0.593400 5.400000
0.807813 -0.848627 -0.389906 0.027130 0.593400 5.400000
0.772576 -0.849415 -0.314901 0.017694 0.593400 5.400000
0.744840 -0.849804 -0.239906 0.010272 0.593400 5.400000
0.724599 -0.849951 -0.164903 0.004852 0.593400 5.400000
0.711864 -0.849997 -0.089905 0.001439 0.593400 5.400000
