# Supplementary material for: Automatic Parking Controller with a Twin Artificial Neural Network Architecture
Source: Hindawi journal article supplement (doi:10.1155/2019/4801985), 2019-01-01
Supplement: f1 [file 4801985.f1.zip › data/data_24.txt]

7.300000 1.100000 0.000000 0.000000 0.000000 5.400000
7.296310 1.100000 -0.074996 0.000023 -0.007003 5.400000
7.284987 1.100000 -0.150004 0.000161 -0.020789 5.400000
7.266264 1.099998 -0.225001 0.000504 -0.037514 5.400000
7.239986 1.099973 -0.299998 0.001169 -0.054104 5.400000
7.206257 1.099912 -0.374998 0.002235 -0.070531 5.400000
7.164987 1.099792 -0.450003 0.003814 -0.086749 5.400000
7.116255 1.099553 -0.524999 0.005982 -0.102722 5.400000
7.059999 1.099141 -0.599996 0.008849 -0.118398 5.400000
6.996265 1.098465 -0.675004 0.012490 -0.133740 5.400000
6.925005 1.097414 -0.750001 0.016997 -0.148709 5.400000
6.846283 1.095869 -0.824998 0.022455 -0.163289 5.400000
6.760057 1.093656 -0.900001 0.028941 -0.177467 5.400000
6.666363 1.090597 -0.975002 0.036522 -0.191232 5.400000
6.565189 1.086462 -1.049999 0.045282 -0.204620 5.400000
6.456585 1.080999 -1.124996 0.055284 -0.217688 5.400000
6.340544 1.073933 -1.200004 0.066606 -0.230513 5.400000
6.217119 1.064921 -1.275000 0.079332 -0.243242 5.400000
6.086365 1.053598 -1.349997 0.093530 -0.256047 5.400000
5.948326 1.039559 -1.425004 0.109322 -0.269219 5.400000
5.803093 1.022355 -1.500001 0.126816 -0.283033 5.400000
5.650771 1.001442 -1.574998 0.146203 -0.298968 5.400000
5.491513 0.976246 -1.650006 0.168026 -0.323103 5.400000
5.325490 0.946005 -1.725002 0.192728 -0.347824 5.400000
5.152998 0.909892 -1.799999 0.220495 -0.372502 5.400000
4.974329 0.866957 -1.875004 0.251559 -0.397598 5.400000
4.789940 0.816189 -1.951169 0.286603 -0.443677 5.400000
4.600959 0.756340 -1.998792 0.327411 -0.478744 5.400000
4.412994 0.687898 -2.000000 0.371685 -0.503129 5.400000
4.228392 0.610960 -2.000000 0.418775 -0.530288 5.400000
4.047634 0.525411 -2.000000 0.464291 -0.477122 5.400000
3.870603 0.432378 -2.000000 0.501733 -0.390829 5.400000
3.696698 0.333609 -2.000000 0.529821 -0.289962 5.400000
3.525190 0.230744 -2.000000 0.549276 -0.189961 5.400000
3.355265 0.125265 -2.000000 0.560479 -0.089960 5.400000
3.186132 0.018593 -1.992033 0.563347 0.010042 5.400000
3.020123 -0.085950 -1.923858 0.558936 0.110042 5.400000
2.859666 -0.185102 -1.848739 0.546932 0.210037 5.400000
2.704128 -0.277925 -1.773742 0.527779 0.310044 5.400000
2.553070 -0.363497 -1.698742 0.501870 0.410039 5.400000
2.406206 -0.441136 -1.623737 0.469178 0.510037 5.400000
2.263342 -0.510187 -1.550319 0.429878 0.593400 5.400000
2.124424 -0.570471 -1.477027 0.389276 0.593400 5.400000
1.990219 -0.622527 -1.402021 0.350747 0.593400 5.400000
1.861249 -0.667057 -1.327026 0.314231 0.593400 5.400000
1.737946 -0.704796 -1.252022 0.279708 0.593400 5.400000
1.620691 -0.736426 -1.177027 0.247210 0.593400 5.400000
1.509794 -0.762619 -1.102023 0.216704 0.593400 5.400000
1.405521 -0.784021 -1.027026 0.188211 0.593400 5.400000
1.308081 -0.801247 -0.952026 0.161726 0.593400 5.400000
1.217649 -0.814868 -0.877025 0.137252 0.593400 5.400000
1.134370 -0.825419 -0.802028 0.114780 0.593400 5.400000
1.058336 -0.833393 -0.727024 0.094320 0.593400 5.400000
0.989629 -0.839250 -0.652029 0.075865 0.593400 5.400000
0.928323 -0.843408 -0.577025 0.059413 0.593400 5.400000
0.874442 -0.846225 -0.502029 0.044974 0.593400 5.400000
0.828027 -0.848022 -0.427027 0.032538 0.593400 5.400000
0.789083 -0.849082 -0.352028 0.022111 0.593400 5.400000
0.757637 -0.849653 -0.277030 0.013693 0.593400 5.400000
0.733693 -0.849902 -0.202027 0.007278 0.593400 5.400000
0.717239 -0.849982 -0.127032 0.002877 0.593400 5.400000
