# Supplementary material for: Automatic Parking Controller with a Twin Artificial Neural Network Architecture
Source: Hindawi journal article supplement (doi:10.1155/2019/4801985), 2019-01-01
Supplement: f1 [file 4801985.f1.zip › data/data_25.txt]

7.400000 1.100000 0.000000 0.000000 0.000000 5.400000
7.396319 1.100000 -0.074999 0.000023 -0.005845 5.400000
7.384983 1.100000 -0.149997 0.000146 -0.017158 5.400000
7.366267 1.099998 -0.224995 0.000458 -0.032017 5.400000
7.339989 1.099975 -0.300003 0.001047 -0.046803 5.400000
7.306265 1.099928 -0.375003 0.002011 -0.061461 5.400000
7.264991 1.099813 -0.450001 0.003419 -0.075953 5.400000
7.216262 1.099600 -0.525000 0.005366 -0.090259 5.400000
7.159996 1.099226 -0.599998 0.007925 -0.104332 5.400000
7.096255 1.098626 -0.674997 0.011184 -0.118162 5.400000
7.025015 1.097682 -0.749995 0.015229 -0.131715 5.400000
6.946273 1.096295 -0.825004 0.020118 -0.144994 5.400000
6.860051 1.094314 -0.900003 0.025937 -0.157983 5.400000
6.766337 1.091571 -0.975001 0.032755 -0.170717 5.400000
6.665159 1.087867 -1.050000 0.040640 -0.183232 5.400000
6.556516 1.082956 -1.124998 0.049666 -0.195586 5.400000
6.440444 1.076604 -1.199997 0.059904 -0.207875 5.400000
6.316957 1.068485 -1.274995 0.071444 -0.220245 5.400000
6.186111 1.058289 -1.350004 0.084374 -0.232886 5.400000
6.047932 1.045609 -1.425002 0.098798 -0.246042 5.400000
5.902525 1.030032 -1.500001 0.114863 -0.260074 5.400000
5.749947 1.011063 -1.575000 0.132736 -0.276334 5.400000
5.590338 0.988139 -1.649998 0.152933 -0.299885 5.400000
5.423869 0.960555 -1.724997 0.175892 -0.324611 5.400000
5.250742 0.927497 -1.799995 0.201822 -0.349328 5.400000
5.071286 0.888096 -1.874996 0.230923 -0.375347 5.400000
4.885825 0.841322 -1.951221 0.263891 -0.420334 5.400000
4.695469 0.786013 -2.000000 0.302578 -0.468788 5.400000
4.505837 0.722305 -2.000000 0.346461 -0.507039 5.400000
4.319384 0.650028 -2.000000 0.393761 -0.531503 5.400000
4.136642 0.568793 -2.000000 0.442359 -0.523087 5.400000
3.957818 0.479264 -2.000000 0.484416 -0.439522 5.400000
3.782455 0.383121 -2.000000 0.517033 -0.339482 5.400000
3.609858 0.282080 -2.000000 0.540705 -0.239484 5.400000
3.439241 0.177728 -2.000000 0.555922 -0.139475 5.400000
3.269788 0.071436 -2.000000 0.563211 -0.039478 5.400000
3.101593 -0.034767 -1.963388 0.562417 0.060520 5.400000
2.938479 -0.136750 -1.885884 0.553766 0.160518 5.400000
2.780564 -0.232804 -1.810875 0.538140 0.260516 5.400000
2.627337 -0.322076 -1.735877 0.515539 0.360521 5.400000
2.478425 -0.403723 -1.660878 0.486218 0.460523 5.400000
2.333647 -0.477020 -1.585381 0.450024 0.569502 5.400000
2.192662 -0.541689 -1.514178 0.409098 0.593400 5.400000
2.056059 -0.597738 -1.439167 0.369581 0.593400 5.400000
1.924432 -0.645906 -1.364162 0.332059 0.593400 5.400000
1.798275 -0.686914 -1.289164 0.296550 0.593400 5.400000
1.677983 -0.721478 -1.214165 0.263055 0.593400 5.400000
1.563902 -0.750285 -1.139163 0.231558 0.593400 5.400000
1.456318 -0.773978 -1.064167 0.202070 0.593400 5.400000
1.355467 -0.793197 -0.989163 0.174594 0.593400 5.400000
1.261552 -0.808532 -0.914168 0.149121 0.593400 5.400000
1.174713 -0.820548 -0.839164 0.125653 0.593400 5.400000
1.095072 -0.829737 -0.764168 0.104197 0.593400 5.400000
1.022733 -0.836591 -0.689166 0.084745 0.593400 5.400000
0.957752 -0.841541 -0.614167 0.067306 0.593400 5.400000
0.900185 -0.844971 -0.539169 0.051870 0.593400 5.400000
0.850077 -0.847235 -0.464166 0.038446 0.593400 5.400000
0.807432 -0.848637 -0.389171 0.027027 0.593400 5.400000
0.772268 -0.849421 -0.314166 0.017611 0.593400 5.400000
0.744606 -0.849806 -0.239171 0.010209 0.593400 5.400000
0.724437 -0.849952 -0.164168 0.004809 0.593400 5.400000
0.711775 -0.849997 -0.089170 0.001415 0.593400 5.400000
