# Supplementary material for: Automatic Parking Controller with a Twin Artificial Neural Network Architecture
Source: Hindawi journal article supplement (doi:10.1155/2019/4801985), 2019-01-01
Supplement: f1 [file 4801985.f1.zip › data/data_26.txt]

6.400000 1.200000 0.000000 0.000000 0.000000 5.400000
6.396256 1.200000 -0.074999 0.000056 -0.039939 5.400000
6.385021 1.199999 -0.150001 0.000398 -0.086284 5.400000
6.366241 1.199981 -0.224997 0.001317 -0.132945 5.400000
6.340002 1.199926 -0.300003 0.003092 -0.180228 5.400000
6.306261 1.199774 -0.374997 0.006032 -0.228414 5.400000
6.264998 1.199437 -0.450004 0.010470 -0.277893 5.400000
6.216259 1.198773 -0.524998 0.016760 -0.329338 5.400000
6.160023 1.197601 -0.600003 0.025332 -0.383931 5.400000
6.096297 1.195632 -0.675000 0.036714 -0.444072 5.400000
6.025125 1.192500 -0.750002 0.051691 -0.514110 5.400000
5.946516 1.187692 -0.825001 0.070727 -0.546513 5.400000
5.860557 1.180657 -0.899999 0.092935 -0.573464 5.400000
5.767331 1.170805 -0.975002 0.117800 -0.576043 5.400000
5.666953 1.157546 -1.049998 0.144683 -0.576060 5.400000
5.559578 1.140318 -1.125004 0.173566 -0.576052 5.400000
5.445403 1.118484 -1.199998 0.204427 -0.575999 5.400000
5.324666 1.091368 -1.275005 0.237292 -0.575946 5.400000
5.197655 1.058311 -1.349999 0.272140 -0.576004 5.400000
5.064732 1.018562 -1.425004 0.308990 -0.576231 5.400000
4.926297 0.971392 -1.500001 0.347904 -0.576377 5.400000
4.782828 0.916166 -1.575002 0.386140 -0.519353 5.400000
4.634551 0.852816 -1.650002 0.420219 -0.446914 5.400000
4.481576 0.781576 -1.725000 0.450595 -0.388506 5.400000
4.324014 0.702622 -1.800003 0.477740 -0.334783 5.400000
4.161903 0.616120 -1.874998 0.501742 -0.283148 5.400000
3.995214 0.522337 -1.951014 0.522482 -0.232307 5.400000
3.824309 0.421870 -2.000000 0.539646 -0.179217 5.400000
3.653394 0.317903 -2.000000 0.552456 -0.123489 5.400000
3.483632 0.212167 -2.000000 0.560947 -0.071674 5.400000
3.314546 0.105329 -2.000000 0.565378 -0.022636 5.400000
3.145878 -0.001825 -1.981543 0.565520 0.036573 5.400000
2.981300 -0.105684 -1.908688 0.559030 0.135271 5.400000
2.822049 -0.203910 -1.833687 0.545126 0.235273 5.400000
2.667559 -0.295545 -1.758690 0.524206 0.335267 5.400000
2.517433 -0.379708 -1.683686 0.496523 0.435267 5.400000
2.371421 -0.455725 -1.608684 0.462069 0.535395 5.400000
2.229307 -0.523014 -1.537137 0.421487 0.593400 5.400000
2.091286 -0.581602 -1.461912 0.381356 0.593400 5.400000
1.958099 -0.632086 -1.386918 0.343226 0.593400 5.400000
1.830237 -0.675191 -1.311914 0.307110 0.593400 5.400000
1.708130 -0.711634 -1.236909 0.273005 0.593400 5.400000
1.592125 -0.742115 -1.161916 0.240894 0.593400 5.400000
1.482551 -0.767297 -1.086912 0.210801 0.593400 5.400000
1.379638 -0.787807 -1.011919 0.182714 0.593400 5.400000
1.283592 -0.804258 -0.936914 0.156634 0.593400 5.400000
1.194599 -0.817220 -0.861910 0.132557 0.593400 5.400000
1.112759 -0.827213 -0.786916 0.110493 0.593400 5.400000
1.038200 -0.834729 -0.711912 0.090432 0.593400 5.400000
0.970980 -0.840215 -0.636915 0.072385 0.593400 5.400000
0.911168 -0.844072 -0.561915 0.056341 0.593400 5.400000
0.858794 -0.846657 -0.486910 0.042305 0.593400 5.400000
0.813875 -0.848286 -0.411917 0.030277 0.593400 5.400000
0.776449 -0.849236 -0.336913 0.020252 0.593400 5.400000
0.746514 -0.849718 -0.261919 0.012239 0.593400 5.400000
0.724069 -0.849925 -0.186915 0.006229 0.593400 5.400000
0.709127 -0.849987 -0.111910 0.002233 0.593400 5.400000
