# Supplementary material for: Automatic Parking Controller with a Twin Artificial Neural Network Architecture
Source: Hindawi journal article supplement (doi:10.1155/2019/4801985), 2019-01-01
Supplement: f1 [file 4801985.f1.zip › data/data_27.txt]

6.500000 1.200000 0.000000 0.000000 0.000000 5.400000
6.496263 1.200000 -0.075004 0.000049 -0.034763 5.400000
6.485028 1.199999 -0.149995 0.000362 -0.076851 5.400000
6.466235 1.199982 -0.224999 0.001205 -0.118968 5.400000
6.440005 1.199929 -0.300001 0.002809 -0.161324 5.400000
6.406253 1.199798 -0.375004 0.005471 -0.204005 5.400000
6.364999 1.199488 -0.449997 0.009453 -0.247094 5.400000
6.316257 1.198896 -0.525000 0.015044 -0.290733 5.400000
6.260010 1.197848 -0.600003 0.022575 -0.335121 5.400000
6.196287 1.196098 -0.675000 0.032387 -0.380598 5.400000
6.125097 1.193361 -0.749998 0.044865 -0.427775 5.400000
6.046449 1.189222 -0.825001 0.060512 -0.479456 5.400000
5.960416 1.183199 -0.900000 0.079774 -0.515771 5.400000
5.867059 1.174685 -0.974997 0.102291 -0.540024 5.400000
5.766475 1.163064 -1.050000 0.127989 -0.565617 5.400000
5.658835 1.147655 -1.125003 0.156692 -0.576199 5.400000
5.544298 1.127740 -1.199996 0.187572 -0.577027 5.400000
5.423119 1.102675 -1.274998 0.220426 -0.576243 5.400000
5.295575 1.071754 -1.350001 0.255242 -0.573257 5.400000
5.161996 1.034246 -1.424996 0.292157 -0.573827 5.400000
5.022760 0.989542 -1.499997 0.328643 -0.526535 5.400000
4.878128 0.937386 -1.575000 0.362739 -0.475377 5.400000
4.728326 0.877728 -1.650003 0.394620 -0.430177 5.400000
4.573561 0.810498 -1.724994 0.424416 -0.387519 5.400000
4.413998 0.735647 -1.799998 0.452106 -0.346256 5.400000
4.249772 0.653230 -1.875001 0.477579 -0.305774 5.400000
4.080978 0.563321 -1.950293 0.500707 -0.265678 5.400000
3.908061 0.466302 -1.999201 0.521217 -0.223016 5.400000
3.735464 0.365180 -2.000000 0.538096 -0.176965 5.400000
3.564447 0.261485 -2.000000 0.551399 -0.135012 5.400000
3.394648 0.155807 -2.000000 0.561338 -0.090394 5.400000
3.225634 0.048856 -1.998992 0.565836 -0.012961 5.400000
3.058501 -0.057156 -1.944753 0.563044 0.087941 5.400000
2.896798 -0.158185 -1.869186 0.552597 0.187940 5.400000
2.740110 -0.253055 -1.794184 0.534968 0.287938 5.400000
2.587956 -0.340859 -1.719180 0.510459 0.387943 5.400000
2.440023 -0.420800 -1.644189 0.479225 0.487935 5.400000
2.296146 -0.492247 -1.568942 0.441115 0.592477 5.400000
2.156040 -0.554931 -1.497411 0.400093 0.593400 5.400000
2.020504 -0.609151 -1.422407 0.361026 0.593400 5.400000
1.890063 -0.655664 -1.347413 0.323957 0.593400 5.400000
1.765185 -0.695170 -1.272409 0.288894 0.593400 5.400000
1.646248 -0.728387 -1.197416 0.255843 0.593400 5.400000
1.533600 -0.755997 -1.122412 0.224799 0.593400 5.400000
1.427496 -0.778644 -1.047407 0.195758 0.593400 5.400000
1.328185 -0.796950 -0.972414 0.168728 0.593400 5.400000
1.235834 -0.811490 -0.897410 0.143702 0.593400 5.400000
1.150596 -0.822823 -0.822416 0.120690 0.593400 5.400000
1.072581 -0.831456 -0.747412 0.099681 0.593400 5.400000
1.001879 -0.837848 -0.672408 0.080677 0.593400 5.400000
0.938551 -0.842424 -0.597414 0.063683 0.593400 5.400000
0.882650 -0.845572 -0.522410 0.048703 0.593400 5.400000
0.834205 -0.847616 -0.447415 0.035716 0.593400 5.400000
0.793233 -0.848852 -0.372412 0.024743 0.593400 5.400000
0.759746 -0.849531 -0.297407 0.015784 0.593400 5.400000
0.733755 -0.849858 -0.222414 0.008823 0.593400 5.400000
0.715272 -0.849968 -0.147410 0.003880 0.593400 5.400000
