# Supplementary material for: Automatic Parking Controller with a Twin Artificial Neural Network Architecture
Source: Hindawi journal article supplement (doi:10.1155/2019/4801985), 2019-01-01
Supplement: f1 [file 4801985.f1.zip › data/data_100.txt]

6.700000 1.100000 0.000000 0.000000 0.000000 5.300000
6.696282 1.100000 -0.075001 0.000035 -0.018788 5.300000
6.685019 1.100000 -0.149999 0.000269 -0.048147 5.300000
6.666236 1.099984 -0.225001 0.000857 -0.077073 5.300000
6.640011 1.099952 -0.299999 0.001987 -0.105823 5.300000
6.606244 1.099857 -0.375002 0.003826 -0.134323 5.300000
6.565009 1.099643 -0.449998 0.006549 -0.162514 5.300000
6.516252 1.099238 -0.525003 0.010326 -0.188341 5.300000
6.460007 1.098515 -0.599997 0.015256 -0.213057 5.300000
6.396275 1.097351 -0.675003 0.021507 -0.237774 5.300000
6.325040 1.095548 -0.749996 0.029245 -0.262495 5.300000
6.246344 1.092885 -0.825003 0.038634 -0.287217 5.300000
6.160169 1.089079 -0.899996 0.049845 -0.311940 5.300000
6.066577 1.083797 -0.975002 0.063032 -0.335981 5.300000
5.965576 1.076658 -1.049996 0.078269 -0.355703 5.300000
5.857238 1.067230 -1.125001 0.095534 -0.373175 5.300000
5.741629 1.055037 -1.199996 0.114856 -0.388162 5.300000
5.618851 1.039551 -1.275001 0.136204 -0.400466 5.300000
5.489042 1.020235 -1.349996 0.159501 -0.409982 5.300000
5.352339 0.996473 -1.425000 0.184651 -0.416837 5.300000
5.208956 0.967709 -1.499997 0.211543 -0.421307 5.300000
5.059108 0.933283 -1.574999 0.240067 -0.423960 5.300000
4.903086 0.892607 -1.649998 0.270136 -0.425507 5.300000
4.741192 0.845013 -1.724999 0.301710 -0.426861 5.300000
4.573797 0.789868 -1.799999 0.334848 -0.429131 5.300000
4.401340 0.726480 -1.874998 0.369718 -0.433610 5.300000
4.224307 0.654105 -1.951218 0.406654 -0.442568 5.300000
4.043797 0.572163 -2.000000 0.445790 -0.449241 5.300000
3.865015 0.482411 -2.000000 0.483996 -0.414896 5.300000
3.689568 0.386426 -2.000000 0.516019 -0.337060 5.300000
3.516891 0.285522 -2.000000 0.540026 -0.242900 5.300000
3.346222 0.181259 -2.000000 0.555545 -0.142870 5.300000
3.176759 0.075044 -1.999962 0.562878 -0.042872 5.300000
3.008438 -0.031278 -1.964254 0.562372 0.057132 5.300000
2.845119 -0.133404 -1.888249 0.554208 0.157134 5.300000
2.687062 -0.229696 -1.813255 0.538739 0.257128 5.300000
2.533699 -0.319178 -1.738249 0.516425 0.357132 5.300000
2.384652 -0.401109 -1.663256 0.487301 0.457126 5.300000
2.239742 -0.474694 -1.587856 0.451390 0.563921 5.300000
2.098644 -0.539643 -1.516755 0.410473 0.593400 5.300000
1.961881 -0.595971 -1.441710 0.370887 0.593400 5.300000
1.830078 -0.644395 -1.366705 0.333299 0.593400 5.300000
1.703729 -0.685632 -1.291706 0.297721 0.593400 5.300000
1.583235 -0.720405 -1.216708 0.264157 0.593400 5.300000
1.468934 -0.749396 -1.141705 0.232594 0.593400 5.300000
1.361125 -0.773251 -1.066710 0.203037 0.593400 5.300000
1.260043 -0.792613 -0.991705 0.175492 0.593400 5.300000
1.165890 -0.808070 -0.916710 0.149951 0.593400 5.300000
1.078809 -0.820189 -0.841707 0.126416 0.593400 5.300000
0.998927 -0.829466 -0.766710 0.104892 0.593400 5.300000
0.926334 -0.836393 -0.691709 0.085371 0.593400 5.300000
0.861108 -0.841399 -0.616708 0.067864 0.593400 5.300000
0.803296 -0.844875 -0.541712 0.052360 0.593400 5.300000
0.752923 -0.847174 -0.466708 0.038869 0.593400 5.300000
0.710024 -0.848602 -0.391713 0.027381 0.593400 5.300000
0.674617 -0.849401 -0.316709 0.017897 0.593400 5.300000
0.646693 -0.849798 -0.241713 0.010427 0.593400 5.300000
0.626277 -0.849949 -0.166711 0.004959 0.593400 5.300000
0.613355 -0.849996 -0.091712 0.001498 0.593400 5.300000
