# Supplementary material for: Automatic Parking Controller with a Twin Artificial Neural Network Architecture
Source: Hindawi journal article supplement (doi:10.1155/2019/4801985), 2019-01-01
Supplement: f1 [file 4801985.f1.zip › data/data_101.txt]

6.800000 1.100000 0.000000 0.000000 0.000000 5.300000
6.796287 1.100000 -0.075001 0.000034 -0.015938 5.300000
6.785019 1.100000 -0.150003 0.000249 -0.042290 5.300000
6.766243 1.099984 -0.225001 0.000789 -0.068275 5.300000
6.740009 1.099955 -0.299997 0.001816 -0.093202 5.300000
6.706244 1.099866 -0.374997 0.003474 -0.117922 5.300000
6.665012 1.099678 -0.450002 0.005900 -0.142644 5.300000
6.616244 1.099311 -0.525000 0.009275 -0.167361 5.300000
6.560011 1.098661 -0.600002 0.013726 -0.192070 5.300000
6.496257 1.097616 -0.675003 0.019421 -0.216728 5.300000
6.425033 1.095980 -0.749999 0.026516 -0.240570 5.300000
6.346324 1.093564 -0.824997 0.035113 -0.262605 5.300000
6.260137 1.090100 -0.899998 0.045311 -0.283461 5.300000
6.166512 1.085309 -0.975000 0.057226 -0.302964 5.300000
6.065471 1.078832 -1.050001 0.070916 -0.320929 5.300000
5.957059 1.070291 -1.125003 0.086441 -0.337198 5.300000
5.841334 1.059254 -1.200002 0.103832 -0.351649 5.300000
5.718382 1.045264 -1.274998 0.123084 -0.364212 5.300000
5.588295 1.027777 -1.349997 0.144214 -0.374953 5.300000
5.451231 1.006278 -1.425002 0.167166 -0.384001 5.300000
5.307334 0.980171 -1.500000 0.191925 -0.391693 5.300000
5.156813 0.948852 -1.575002 0.218457 -0.398504 5.300000
4.999908 0.911689 -1.650003 0.246801 -0.405098 5.300000
4.836915 0.868006 -1.725000 0.277023 -0.412360 5.300000
4.668193 0.817102 -1.799997 0.309287 -0.421448 5.300000
4.494147 0.758169 -1.875004 0.343898 -0.433965 5.300000
4.315335 0.690356 -1.950659 0.381442 -0.452662 5.300000
4.132860 0.612837 -1.999013 0.422326 -0.470525 5.300000
3.952167 0.527048 -2.000000 0.464123 -0.468940 5.300000
3.775078 0.434099 -2.000000 0.501099 -0.389677 5.300000
3.601123 0.335445 -2.000000 0.529358 -0.291842 5.300000
3.429574 0.232623 -2.000000 0.548980 -0.191842 5.300000
3.259623 0.127199 -2.000000 0.560338 -0.091837 5.300000
3.090425 0.020494 -1.991728 0.563608 0.008156 5.300000
2.924389 -0.084073 -1.925441 0.559153 0.108160 5.300000
2.763849 -0.183331 -1.849977 0.547195 0.208164 5.300000
2.608243 -0.276267 -1.774980 0.528199 0.308157 5.300000
2.457110 -0.361971 -1.699983 0.502406 0.408162 5.300000
2.310185 -0.439759 -1.624983 0.469857 0.508162 5.300000
2.167267 -0.508968 -1.551411 0.430662 0.593400 5.300000
2.028264 -0.569415 -1.478436 0.390020 0.593400 5.300000
1.893975 -0.621620 -1.403431 0.351453 0.593400 5.300000
1.764892 -0.666285 -1.328436 0.314899 0.593400 5.300000
1.641479 -0.704145 -1.253432 0.280339 0.593400 5.300000
1.524109 -0.735883 -1.178436 0.247802 0.593400 5.300000
1.413089 -0.762172 -1.103433 0.217258 0.593400 5.300000
1.308689 -0.783658 -1.028436 0.188728 0.593400 5.300000
1.211119 -0.800958 -0.953436 0.162206 0.593400 5.300000
1.120561 -0.814642 -0.878434 0.137694 0.593400 5.300000
1.037141 -0.825247 -0.803438 0.115184 0.593400 5.300000
0.960968 -0.833263 -0.728434 0.094686 0.593400 5.300000
0.892123 -0.839157 -0.653439 0.076193 0.593400 5.300000
0.830678 -0.843343 -0.578435 0.059704 0.593400 5.300000
0.776658 -0.846182 -0.503439 0.045227 0.593400 5.300000
0.730101 -0.847996 -0.428437 0.032753 0.593400 5.300000
0.691021 -0.849067 -0.353438 0.022289 0.593400 5.300000
0.659433 -0.849646 -0.278440 0.013833 0.593400 5.300000
0.635344 -0.849899 -0.203437 0.007380 0.593400 5.300000
0.618748 -0.849981 -0.128442 0.002941 0.593400 5.300000
