# Supplementary material for: Automatic Parking Controller with a Twin Artificial Neural Network Architecture
Source: Hindawi journal article supplement (doi:10.1155/2019/4801985), 2019-01-01
Supplement: f1 [file 4801985.f1.zip › data/data_102.txt]

6.900000 1.100000 0.000000 0.000000 0.000000 5.300000
6.896294 1.100000 -0.074999 0.000033 -0.012231 5.300000
6.885014 1.100000 -0.149999 0.000219 -0.034782 5.300000
6.866249 1.099996 -0.224998 0.000694 -0.058609 5.300000
6.840009 1.099957 -0.299998 0.001616 -0.082242 5.300000
6.806245 1.099881 -0.374997 0.003116 -0.105607 5.300000
6.765008 1.099708 -0.449997 0.005333 -0.128616 5.300000
6.716243 1.099379 -0.524996 0.008397 -0.151211 5.300000
6.660013 1.098796 -0.599995 0.012440 -0.173271 5.300000
6.596257 1.097842 -0.675003 0.017603 -0.194712 5.300000
6.525035 1.096365 -0.750004 0.023982 -0.215404 5.300000
6.446304 1.094175 -0.825004 0.031702 -0.235243 5.300000
6.360119 1.091061 -0.900003 0.040856 -0.254094 5.300000
6.266460 1.086735 -0.975003 0.051534 -0.271865 5.300000
6.165390 1.080904 -1.050002 0.063813 -0.288447 5.300000
6.056907 1.073222 -1.125001 0.077753 -0.303772 5.300000
5.941085 1.063296 -1.200001 0.093399 -0.317810 5.300000
5.817971 1.050695 -1.275000 0.110790 -0.330602 5.300000
5.687682 1.034944 -1.350000 0.129934 -0.342245 5.300000
5.550292 1.015531 -1.424999 0.150881 -0.352960 5.300000
5.405967 0.991923 -1.499999 0.173644 -0.363065 5.300000
5.254873 0.963514 -1.574998 0.198279 -0.373067 5.300000
5.097216 0.929665 -1.649997 0.224880 -0.383617 5.300000
4.933280 0.889693 -1.724997 0.253627 -0.395622 5.300000
4.763372 0.842842 -1.799996 0.284779 -0.410576 5.300000
4.587930 0.788255 -1.874996 0.318987 -0.433639 5.300000
4.407474 0.724881 -1.951666 0.356896 -0.458356 5.300000
4.223185 0.651817 -1.998617 0.398660 -0.483457 5.300000
4.040602 0.570123 -2.000000 0.442949 -0.494212 5.300000
3.861765 0.480648 -2.000000 0.483764 -0.429987 5.300000
3.686350 0.384583 -2.000000 0.516598 -0.341412 5.300000
3.513702 0.283631 -2.000000 0.540360 -0.241031 5.300000
3.343081 0.179291 -2.000000 0.555779 -0.141029 5.300000
3.173585 0.073040 -1.999331 0.562840 -0.041030 5.300000
3.005359 -0.033219 -1.961528 0.562207 0.058971 5.300000
2.842167 -0.135236 -1.886870 0.553990 0.158969 5.300000
2.684206 -0.231405 -1.811871 0.538392 0.258970 5.300000
2.530913 -0.320766 -1.736871 0.515942 0.358968 5.300000
2.381949 -0.402537 -1.661872 0.486699 0.458968 5.300000
2.237119 -0.475958 -1.586420 0.450654 0.566739 5.300000
2.096086 -0.540755 -1.515354 0.409726 0.593400 5.300000
1.959409 -0.596931 -1.440329 0.370178 0.593400 5.300000
1.827702 -0.645216 -1.365325 0.332626 0.593400 5.300000
1.701457 -0.686328 -1.290326 0.297085 0.593400 5.300000
1.581075 -0.720988 -1.215327 0.263559 0.593400 5.300000
1.466891 -0.749879 -1.140325 0.232031 0.593400 5.300000
1.359204 -0.773646 -1.065330 0.202512 0.593400 5.300000
1.258248 -0.792931 -0.990325 0.175005 0.593400 5.300000
1.164224 -0.808321 -0.915330 0.149500 0.593400 5.300000
1.077274 -0.820384 -0.840327 0.126001 0.593400 5.300000
0.997524 -0.829613 -0.765330 0.104515 0.593400 5.300000
0.925068 -0.836501 -0.690329 0.085031 0.593400 5.300000
0.859978 -0.841476 -0.615329 0.067561 0.593400 5.300000
0.802302 -0.844927 -0.540331 0.052094 0.593400 5.300000
0.752067 -0.847207 -0.465328 0.038639 0.593400 5.300000
0.709305 -0.848621 -0.390333 0.027189 0.593400 5.300000
0.674036 -0.849412 -0.315329 0.017742 0.593400 5.300000
0.646249 -0.849803 -0.240333 0.010308 0.593400 5.300000
0.625971 -0.849951 -0.165331 0.004877 0.593400 5.300000
0.613186 -0.849997 -0.090332 0.001453 0.593400 5.300000
