# Supplementary material for: Automatic Parking Controller with a Twin Artificial Neural Network Architecture
Source: Hindawi journal article supplement (doi:10.1155/2019/4801985), 2019-01-01
Supplement: f1 [file 4801985.f1.zip › data/data_103.txt]

7.000000 1.100000 0.000000 0.000000 0.000000 5.300000
6.996303 1.100000 -0.075004 0.000028 -0.009992 5.300000
6.985002 1.100000 -0.149997 0.000192 -0.029772 5.300000
6.966254 1.099996 -0.225001 0.000631 -0.051012 5.300000
6.939998 1.099969 -0.300005 0.001457 -0.072069 5.300000
6.906251 1.099898 -0.374998 0.002798 -0.092906 5.300000
6.865002 1.099735 -0.450003 0.004776 -0.113435 5.300000
6.816253 1.099441 -0.525001 0.007522 -0.133580 5.300000
6.760003 1.098919 -0.600000 0.011132 -0.153270 5.300000
6.696263 1.098067 -0.675005 0.015737 -0.172432 5.300000
6.625022 1.096746 -0.749997 0.021422 -0.190978 5.300000
6.546294 1.094797 -0.825001 0.028302 -0.208827 5.300000
6.460090 1.092013 -0.900005 0.036467 -0.225911 5.300000
6.366416 1.088154 -0.974998 0.045994 -0.242172 5.300000
6.265311 1.082945 -1.050003 0.056950 -0.257570 5.300000
6.156770 1.076089 -1.125000 0.069421 -0.272098 5.300000
6.040869 1.067218 -1.200000 0.083457 -0.285794 5.300000
5.917625 1.055946 -1.275005 0.099108 -0.298733 5.300000
5.787137 1.041848 -1.349997 0.116430 -0.311075 5.300000
5.649488 1.024422 -1.425002 0.135485 -0.323065 5.300000
5.504794 1.003175 -1.500004 0.156349 -0.335054 5.300000
5.353203 0.977520 -1.574999 0.179132 -0.347548 5.300000
5.194901 0.946838 -1.650003 0.203999 -0.361314 5.300000
5.030131 0.910425 -1.725000 0.231408 -0.382584 5.300000
4.859221 0.867427 -1.800000 0.262013 -0.407492 5.300000
4.682565 0.816847 -1.875005 0.296099 -0.432207 5.300000
4.500718 0.757646 -1.950756 0.333892 -0.456933 5.300000
4.314811 0.688845 -1.998920 0.375515 -0.481647 5.300000
4.130360 0.611410 -2.000000 0.420029 -0.504212 5.300000
3.949650 0.525747 -2.000000 0.464303 -0.474525 5.300000
3.772597 0.432761 -2.000000 0.501553 -0.391413 5.300000
3.598682 0.334000 -2.000000 0.529727 -0.290402 5.300000
3.427155 0.231171 -2.000000 0.549159 -0.190399 5.300000
3.257230 0.125683 -2.000000 0.560505 -0.090402 5.300000
3.088134 0.019051 -1.995145 0.563561 0.009601 5.300000
2.922042 -0.085547 -1.924254 0.558985 0.109598 5.300000
2.761573 -0.184710 -1.848905 0.546988 0.209601 5.300000
2.606038 -0.277555 -1.773901 0.527863 0.309598 5.300000
2.454970 -0.363146 -1.698899 0.501987 0.409601 5.300000
2.308104 -0.440818 -1.623903 0.469333 0.509598 5.300000
2.165234 -0.509902 -1.550506 0.430061 0.593400 5.300000
2.026295 -0.570224 -1.477357 0.389450 0.593400 5.300000
1.892078 -0.622315 -1.402351 0.350912 0.593400 5.300000
1.763074 -0.666877 -1.327356 0.314387 0.593400 5.300000
1.639746 -0.704644 -1.252352 0.279856 0.593400 5.300000
1.522464 -0.736299 -1.177357 0.247348 0.593400 5.300000
1.411537 -0.762515 -1.102353 0.216833 0.593400 5.300000
1.307235 -0.783936 -1.027356 0.188332 0.593400 5.300000
1.209765 -0.801179 -0.952356 0.161839 0.593400 5.300000
1.119309 -0.814815 -0.877355 0.137355 0.593400 5.300000
1.035992 -0.825379 -0.802358 0.114874 0.593400 5.300000
0.959924 -0.833362 -0.727354 0.094406 0.593400 5.300000
0.891185 -0.839228 -0.652359 0.075941 0.593400 5.300000
0.829847 -0.843393 -0.577355 0.059481 0.593400 5.300000
0.775935 -0.846215 -0.502359 0.045033 0.593400 5.300000
0.729485 -0.848016 -0.427357 0.032589 0.593400 5.300000
0.690513 -0.849078 -0.352358 0.022153 0.593400 5.300000
0.659033 -0.849652 -0.277360 0.013726 0.593400 5.300000
0.635052 -0.849901 -0.202357 0.007302 0.593400 5.300000
0.618565 -0.849981 -0.127362 0.002892 0.593400 5.300000
