# Supplementary material for: Automatic Parking Controller with a Twin Artificial Neural Network Architecture
Source: Hindawi journal article supplement (doi:10.1155/2019/4801985), 2019-01-01
Supplement: f1 [file 4801985.f1.zip › data/data_104.txt]

7.100000 1.100000 0.000000 0.000000 0.000000 5.300000
7.096309 1.100000 -0.075001 0.000028 -0.008255 5.300000
7.084994 1.100000 -0.150002 0.000176 -0.025013 5.300000
7.066261 1.099997 -0.224997 0.000566 -0.043867 5.300000
7.039997 1.099971 -0.300004 0.001299 -0.062551 5.300000
7.006256 1.099903 -0.375000 0.002496 -0.081040 5.300000
6.964990 1.099769 -0.449996 0.004266 -0.099278 5.300000
6.916258 1.099501 -0.525002 0.006700 -0.117194 5.300000
6.859996 1.099040 -0.599998 0.009917 -0.134737 5.300000
6.796261 1.098276 -0.675000 0.014006 -0.151844 5.300000
6.725011 1.097100 -0.749999 0.019063 -0.168480 5.300000
6.646296 1.095366 -0.825002 0.025178 -0.184566 5.300000
6.560074 1.092885 -0.900002 0.032450 -0.200093 5.300000
6.466390 1.089453 -0.974997 0.040925 -0.215023 5.300000
6.365241 1.084819 -1.049995 0.050714 -0.229367 5.300000
6.256672 1.078712 -1.125000 0.061862 -0.243148 5.300000
6.140682 1.070804 -1.199997 0.074445 -0.256441 5.300000
6.017350 1.060745 -1.274999 0.088524 -0.269364 5.300000
5.886706 1.048123 -1.349997 0.104195 -0.282093 5.300000
5.748844 1.032512 -1.425001 0.121520 -0.294890 5.300000
5.603847 1.013410 -1.499999 0.140613 -0.308134 5.300000
5.451854 0.990293 -1.574994 0.161638 -0.322676 5.300000
5.293013 0.962496 -1.650002 0.185062 -0.345199 5.300000
5.127566 0.929300 -1.724996 0.211440 -0.370019 5.300000
4.955807 0.889799 -1.799995 0.241016 -0.394736 5.300000
4.778113 0.843065 -1.874999 0.273984 -0.420213 5.300000
4.594954 0.787970 -1.951673 0.310900 -0.451396 5.300000
4.407491 0.723516 -1.998689 0.352007 -0.476405 5.300000
4.221277 0.650485 -2.000000 0.396028 -0.501120 5.300000
4.038604 0.569126 -2.000000 0.442395 -0.521599 5.300000
3.859768 0.479592 -2.000000 0.484241 -0.436732 5.300000
3.684385 0.383485 -2.000000 0.516888 -0.339881 5.300000
3.511780 0.282463 -2.000000 0.540620 -0.239884 5.300000
3.341159 0.178123 -2.000000 0.555838 -0.139875 5.300000
3.171680 0.071832 -2.000000 0.563032 -0.039877 5.300000
3.003434 -0.034424 -1.961516 0.562297 0.060121 5.300000
2.840324 -0.136380 -1.886011 0.553827 0.160119 5.300000
2.682412 -0.232464 -1.811010 0.538190 0.260117 5.300000
2.529177 -0.321756 -1.736009 0.515637 0.360120 5.300000
2.380263 -0.403422 -1.661008 0.486332 0.460123 5.300000
2.235483 -0.476750 -1.585517 0.450188 0.568605 5.300000
2.094487 -0.541449 -1.514481 0.409260 0.593400 5.300000
1.957865 -0.597530 -1.439467 0.369735 0.593400 5.300000
1.826218 -0.645728 -1.364462 0.332205 0.593400 5.300000
1.700038 -0.686763 -1.289464 0.296688 0.593400 5.300000
1.579726 -0.721352 -1.214465 0.263185 0.593400 5.300000
1.465615 -0.750180 -1.139463 0.231680 0.593400 5.300000
1.358005 -0.773892 -1.064467 0.202184 0.593400 5.300000
1.257127 -0.793129 -0.989463 0.174700 0.593400 5.300000
1.163183 -0.808478 -0.914468 0.149219 0.593400 5.300000
1.076315 -0.820505 -0.839464 0.125743 0.593400 5.300000
0.996649 -0.829705 -0.764468 0.104279 0.593400 5.300000
0.924277 -0.836568 -0.689466 0.084818 0.593400 5.300000
0.859272 -0.841524 -0.614467 0.067372 0.593400 5.300000
0.801682 -0.844960 -0.539469 0.051928 0.593400 5.300000
0.751533 -0.847228 -0.464466 0.038496 0.593400 5.300000
0.708857 -0.848633 -0.389471 0.027069 0.593400 5.300000
0.673674 -0.849418 -0.314466 0.017645 0.593400 5.300000
0.645973 -0.849805 -0.239471 0.010235 0.593400 5.300000
0.625781 -0.849952 -0.164468 0.004827 0.593400 5.300000
0.613081 -0.849997 -0.089470 0.001425 0.593400 5.300000
