# Supplementary material for: Automatic Parking Controller with a Twin Artificial Neural Network Architecture
Source: Hindawi journal article supplement (doi:10.1155/2019/4801985), 2019-01-01
Supplement: f1 [file 4801985.f1.zip › data/data_105.txt]

7.200000 1.100000 0.000000 0.000000 0.000000 5.300000
7.196309 1.100000 -0.074998 0.000023 -0.006932 5.300000
7.184983 1.100000 -0.149996 0.000161 -0.020851 5.300000
7.166265 1.099998 -0.224999 0.000504 -0.037599 5.300000
7.139988 1.099973 -0.300001 0.001169 -0.054221 5.300000
7.106260 1.099912 -0.374998 0.002235 -0.070676 5.300000
7.064996 1.099792 -0.449998 0.003816 -0.086928 5.300000
7.016254 1.099552 -0.525002 0.005986 -0.102923 5.300000
6.959999 1.099140 -0.600002 0.008863 -0.118623 5.300000
6.896262 1.098464 -0.674999 0.012505 -0.133983 5.300000
6.825013 1.097413 -0.750000 0.017028 -0.148985 5.300000
6.746287 1.095856 -0.825004 0.022494 -0.163583 5.300000
6.660060 1.093642 -0.899995 0.028989 -0.177770 5.300000
6.566365 1.090580 -0.975000 0.036578 -0.191558 5.300000
6.465192 1.086436 -1.049998 0.045350 -0.204952 5.300000
6.356587 1.080976 -1.124996 0.055377 -0.218026 5.300000
6.240552 1.073883 -1.199998 0.066713 -0.230863 5.300000
6.117132 1.064857 -1.275001 0.079454 -0.243582 5.300000
5.986375 1.053528 -1.349999 0.093673 -0.256397 5.300000
5.848332 1.039468 -1.424997 0.109486 -0.269556 5.300000
5.703112 1.022230 -1.500001 0.127003 -0.283363 5.300000
5.550792 1.001295 -1.575002 0.146403 -0.299196 5.300000
5.391537 0.976059 -1.649996 0.168249 -0.323415 5.300000
5.225529 0.945781 -1.724998 0.192972 -0.348134 5.300000
5.053039 0.909625 -1.799995 0.220766 -0.372819 5.300000
4.874383 0.866645 -1.874995 0.251854 -0.397735 5.300000
4.690015 0.815812 -1.951204 0.286911 -0.443819 5.300000
4.501042 0.755914 -1.998790 0.327724 -0.478606 5.300000
4.313107 0.687407 -2.000000 0.371983 -0.502997 5.300000
4.128532 0.610413 -2.000000 0.419063 -0.530169 5.300000
3.947794 0.524830 -2.000000 0.464517 -0.476566 5.300000
3.770783 0.431753 -2.000000 0.501912 -0.390240 5.300000
3.596894 0.332961 -2.000000 0.529947 -0.289378 5.300000
3.425390 0.230080 -2.000000 0.549354 -0.189383 5.300000
3.255476 0.124581 -2.000000 0.560500 -0.089377 5.300000
3.086345 0.017921 -1.991717 0.563332 0.010618 5.300000
2.920377 -0.086583 -1.923236 0.558884 0.110624 5.300000
2.759964 -0.185701 -1.848135 0.546828 0.210619 5.300000
2.604466 -0.278470 -1.773136 0.527638 0.310616 5.300000
2.453452 -0.363987 -1.698132 0.501689 0.410620 5.300000
2.306627 -0.441567 -1.623131 0.468972 0.510617 5.300000
2.163794 -0.510562 -1.549866 0.429635 0.593400 5.300000
2.024902 -0.570796 -1.476592 0.389047 0.593400 5.300000
1.890735 -0.622806 -1.401587 0.350529 0.593400 5.300000
1.761787 -0.667295 -1.326591 0.314025 0.593400 5.300000
1.638518 -0.704996 -1.251587 0.279514 0.593400 5.300000
1.521300 -0.736593 -1.176592 0.247027 0.593400 5.300000
1.410440 -0.762756 -1.101588 0.216533 0.593400 5.300000
1.306206 -0.784132 -1.026591 0.188052 0.593400 5.300000
1.208806 -0.801335 -0.951590 0.161579 0.593400 5.300000
1.118423 -0.814938 -0.876590 0.137116 0.593400 5.300000
1.035180 -0.825473 -0.801593 0.114655 0.593400 5.300000
0.959186 -0.833432 -0.726589 0.094207 0.593400 5.300000
0.890523 -0.839279 -0.651594 0.075764 0.593400 5.300000
0.829260 -0.843428 -0.576590 0.059323 0.593400 5.300000
0.775423 -0.846238 -0.501594 0.044896 0.593400 5.300000
0.729049 -0.848031 -0.426592 0.032472 0.593400 5.300000
0.690154 -0.849086 -0.351593 0.022056 0.593400 5.300000
0.658750 -0.849656 -0.276594 0.013650 0.593400 5.300000
0.634846 -0.849903 -0.201592 0.007247 0.593400 5.300000
0.618435 -0.849982 -0.126597 0.002858 0.593400 5.300000
