# Supplementary material for: Automatic Parking Controller with a Twin Artificial Neural Network Architecture
Source: Hindawi journal article supplement (doi:10.1155/2019/4801985), 2019-01-01
Supplement: f1 [file 4801985.f1.zip › data/data_106.txt]

7.300000 1.100000 0.000000 0.000000 0.000000 5.300000
7.296322 1.100000 -0.074999 0.000023 -0.005857 5.300000
7.284980 1.100000 -0.150000 0.000147 -0.017210 5.300000
7.266267 1.099998 -0.224997 0.000458 -0.032101 5.300000
7.239990 1.099975 -0.299998 0.001056 -0.046909 5.300000
7.206260 1.099928 -0.375004 0.002011 -0.061597 5.300000
7.164989 1.099813 -0.449998 0.003421 -0.076120 5.300000
7.116261 1.099600 -0.525004 0.005369 -0.090446 5.300000
7.059993 1.099226 -0.599997 0.007938 -0.104552 5.300000
6.996260 1.098615 -0.675003 0.011209 -0.118391 5.300000
6.925013 1.097681 -0.749997 0.015255 -0.131970 5.300000
6.846274 1.096292 -0.825002 0.020156 -0.145265 5.300000
6.760045 1.094303 -0.900001 0.025982 -0.158269 5.300000
6.666334 1.091557 -0.975002 0.032808 -0.171020 5.300000
6.565156 1.087837 -1.049999 0.040710 -0.183540 5.300000
6.456511 1.082933 -1.125001 0.049746 -0.195902 5.300000
6.340446 1.076565 -1.199998 0.060001 -0.208204 5.300000
6.216959 1.068434 -1.275001 0.071561 -0.220568 5.300000
6.086109 1.058218 -1.349996 0.084510 -0.233210 5.300000
5.947935 1.045515 -1.425000 0.098956 -0.246364 5.300000
5.802531 1.029913 -1.500005 0.115031 -0.260375 5.300000
5.649953 1.010927 -1.574999 0.132928 -0.276624 5.300000
5.490354 0.987960 -1.650004 0.153141 -0.300144 5.300000
5.323886 0.960349 -1.724998 0.176116 -0.324872 5.300000
5.150772 0.927245 -1.800003 0.202075 -0.349593 5.300000
4.971315 0.887800 -1.874998 0.231193 -0.375604 5.300000
4.785874 0.840976 -1.951184 0.264175 -0.420502 5.300000
4.595539 0.785610 -2.000000 0.302886 -0.468970 5.300000
4.405925 0.721836 -2.000000 0.346773 -0.506892 5.300000
4.219493 0.649510 -2.000000 0.394062 -0.531374 5.300000
4.036774 0.568215 -2.000000 0.442620 -0.522465 5.300000
3.857965 0.478643 -2.000000 0.484630 -0.438983 5.300000
3.682620 0.382473 -2.000000 0.517187 -0.338890 5.300000
3.510039 0.281414 -2.000000 0.540806 -0.238892 5.300000
3.339434 0.177045 -2.000000 0.555973 -0.138894 5.300000
3.169980 0.070749 -2.000000 0.563214 -0.038888 5.300000
3.001816 -0.035437 -1.962763 0.562382 0.061112 5.300000
2.838743 -0.137368 -1.885267 0.553680 0.161109 5.300000
2.680875 -0.233385 -1.810269 0.538016 0.261107 5.300000
2.527685 -0.322600 -1.735265 0.515374 0.361112 5.300000
2.378809 -0.404185 -1.660270 0.486012 0.461113 5.300000
2.234073 -0.477427 -1.584732 0.449787 0.570220 5.300000
2.093112 -0.542044 -1.513733 0.408859 0.593400 5.300000
1.956537 -0.598045 -1.438724 0.369354 0.593400 5.300000
1.824941 -0.646169 -1.363720 0.331844 0.593400 5.300000
1.698818 -0.687136 -1.288722 0.296347 0.593400 5.300000
1.578566 -0.721664 -1.213722 0.262863 0.593400 5.300000
1.464518 -0.750439 -1.138721 0.231378 0.593400 5.300000
1.356973 -0.774104 -1.063724 0.201902 0.593400 5.300000
1.256163 -0.793299 -0.988720 0.174438 0.593400 5.300000
1.162289 -0.808612 -0.913726 0.148977 0.593400 5.300000
1.075491 -0.820610 -0.838721 0.125520 0.593400 5.300000
0.995897 -0.829784 -0.763725 0.104077 0.593400 5.300000
0.923598 -0.836626 -0.688724 0.084636 0.593400 5.300000
0.858666 -0.841565 -0.613724 0.067209 0.593400 5.300000
0.801149 -0.844987 -0.538726 0.051785 0.593400 5.300000
0.751074 -0.847245 -0.463723 0.038373 0.593400 5.300000
0.708473 -0.848643 -0.388728 0.026966 0.593400 5.300000
0.673364 -0.849424 -0.313724 0.017562 0.593400 5.300000
0.645736 -0.849808 -0.238729 0.010171 0.593400 5.300000
0.625619 -0.849953 -0.163725 0.004783 0.593400 5.300000
0.612993 -0.849997 -0.088728 0.001401 0.593400 5.300000
