# Supplementary material for: Automatic Parking Controller with a Twin Artificial Neural Network Architecture
Source: Hindawi journal article supplement (doi:10.1155/2019/4801985), 2019-01-01
Supplement: f1 [file 4801985.f1.zip › data/data_107.txt]

6.300000 1.200000 0.000000 0.000000 0.000000 5.300000
6.296261 1.200000 -0.074999 0.000056 -0.040011 5.300000
6.285025 1.199999 -0.149998 0.000400 -0.086427 5.300000
6.266241 1.199981 -0.224996 0.001318 -0.133150 5.300000
6.239996 1.199926 -0.300001 0.003098 -0.180515 5.300000
6.206259 1.199774 -0.375004 0.006043 -0.228785 5.300000
6.164993 1.199436 -0.450003 0.010483 -0.278371 5.300000
6.116257 1.198772 -0.525001 0.016792 -0.329946 5.300000
6.060023 1.197599 -0.600000 0.025374 -0.384736 5.300000
5.996297 1.195627 -0.674999 0.036785 -0.445174 5.300000
5.925122 1.192484 -0.749998 0.051813 -0.515134 5.300000
5.846521 1.187674 -0.824997 0.070866 -0.546548 5.300000
5.760555 1.180616 -0.900006 0.093075 -0.573482 5.300000
5.667333 1.170755 -0.975004 0.117940 -0.576053 5.300000
5.566955 1.157489 -1.050003 0.144833 -0.576090 5.300000
5.459586 1.140240 -1.125002 0.173707 -0.576075 5.300000
5.345416 1.118392 -1.200000 0.204572 -0.575963 5.300000
5.224674 1.091263 -1.274999 0.237437 -0.575843 5.300000
5.097670 1.058175 -1.349998 0.272283 -0.575969 5.300000
4.964754 1.018417 -1.424998 0.309131 -0.576445 5.300000
4.826329 0.971221 -1.500006 0.348043 -0.576754 5.300000
4.682868 0.915966 -1.575004 0.386344 -0.520375 5.300000
4.534598 0.852586 -1.650003 0.420491 -0.447328 5.300000
4.381648 0.781299 -1.725002 0.450877 -0.388659 5.300000
4.224113 0.702304 -1.800000 0.478030 -0.334754 5.300000
4.062016 0.615760 -1.874999 0.502014 -0.282952 5.300000
3.895355 0.521928 -1.950991 0.522740 -0.231960 5.300000
3.724481 0.421421 -2.000000 0.539862 -0.178727 5.300000
3.553580 0.317416 -2.000000 0.552626 -0.122872 5.300000
3.383832 0.211661 -2.000000 0.561065 -0.070924 5.300000
3.214759 0.104806 -2.000000 0.565428 -0.021799 5.300000
3.046108 -0.002351 -1.981229 0.565505 0.037059 5.300000
2.881555 -0.106174 -1.908270 0.558977 0.135738 5.300000
2.722326 -0.204371 -1.833260 0.545042 0.235736 5.300000
2.567861 -0.295970 -1.758262 0.524089 0.335742 5.300000
2.417766 -0.380096 -1.683263 0.496373 0.435743 5.300000
2.271786 -0.456056 -1.608255 0.461884 0.535910 5.300000
2.129688 -0.523310 -1.536797 0.421293 0.593400 5.300000
1.991698 -0.581858 -1.461559 0.381172 0.593400 5.300000
1.858535 -0.632305 -1.386565 0.343051 0.593400 5.300000
1.730699 -0.675377 -1.311561 0.306945 0.593400 5.300000
1.608613 -0.711790 -1.236557 0.272849 0.593400 5.300000
1.492645 -0.742246 -1.161564 0.240747 0.593400 5.300000
1.383095 -0.767404 -1.086560 0.210665 0.593400 5.300000
1.280217 -0.787894 -1.011566 0.182587 0.593400 5.300000
1.184206 -0.804327 -0.936562 0.156516 0.593400 5.300000
1.095237 -0.817274 -0.861558 0.132449 0.593400 5.300000
1.013441 -0.827254 -0.786564 0.110394 0.593400 5.300000
0.938915 -0.834759 -0.711560 0.090342 0.593400 5.300000
0.871732 -0.840237 -0.636563 0.072305 0.593400 5.300000
0.811949 -0.844087 -0.561562 0.056270 0.593400 5.300000
0.759608 -0.846667 -0.486558 0.042243 0.593400 5.300000
0.714732 -0.848292 -0.411564 0.030225 0.593400 5.300000
0.677341 -0.849239 -0.336560 0.020210 0.593400 5.300000
0.647431 -0.849719 -0.261566 0.012206 0.593400 5.300000
0.625032 -0.849925 -0.186562 0.006206 0.593400 5.300000
0.610113 -0.849987 -0.111558 0.002219 0.593400 5.300000
