# Supplementary material for: Automatic Parking Controller with a Twin Artificial Neural Network Architecture
Source: Hindawi journal article supplement (doi:10.1155/2019/4801985), 2019-01-01
Supplement: f1 [file 4801985.f1.zip › data/data_108.txt]

6.400000 1.200000 0.000000 0.000000 0.000000 5.300000
6.396262 1.200000 -0.074996 0.000049 -0.034802 5.300000
6.385024 1.199999 -0.150003 0.000362 -0.076916 5.300000
6.366235 1.199982 -0.224999 0.001206 -0.119062 5.300000
6.340003 1.199929 -0.300000 0.002815 -0.161455 5.300000
6.306259 1.199798 -0.375002 0.005472 -0.204175 5.300000
6.264992 1.199488 -0.449998 0.009457 -0.247301 5.300000
6.216263 1.198896 -0.524997 0.015057 -0.290993 5.300000
6.160018 1.197837 -0.600001 0.022593 -0.335446 5.300000
6.096290 1.196096 -0.674997 0.032415 -0.380983 5.300000
6.025093 1.193357 -0.750004 0.044914 -0.428271 5.300000
5.946450 1.189215 -0.825000 0.060575 -0.480089 5.300000
5.860417 1.183177 -0.899996 0.079868 -0.516741 5.300000
5.767057 1.174658 -0.975003 0.102443 -0.540985 5.300000
5.666472 1.163021 -1.049999 0.128190 -0.566717 5.300000
5.558834 1.147580 -1.124998 0.156918 -0.576187 5.300000
5.444311 1.127645 -1.200002 0.187798 -0.577030 5.300000
5.323135 1.102548 -1.274997 0.220657 -0.576263 5.300000
5.195604 1.071603 -1.350005 0.255465 -0.573295 5.300000
5.062025 1.034065 -1.425001 0.292378 -0.573790 5.300000
4.922800 0.989322 -1.499997 0.328882 -0.526912 5.300000
4.778187 0.937135 -1.575004 0.362999 -0.475507 5.300000
4.628401 0.877430 -1.650000 0.394884 -0.430177 5.300000
4.473650 0.810166 -1.724998 0.424680 -0.387422 5.300000
4.314101 0.735273 -1.800003 0.452349 -0.346076 5.300000
4.149897 0.652821 -1.874999 0.477808 -0.305515 5.300000
3.981124 0.562876 -1.950313 0.500910 -0.265339 5.300000
3.808226 0.465823 -1.999205 0.521388 -0.222596 5.300000
3.635637 0.364670 -2.000000 0.538235 -0.176479 5.300000
3.464636 0.260961 -2.000000 0.551483 -0.134454 5.300000
3.294841 0.155275 -2.000000 0.561379 -0.089730 5.300000
3.125838 0.048316 -1.998918 0.565834 -0.012517 5.300000
2.958726 -0.057679 -1.944282 0.563005 0.088417 5.300000
2.797046 -0.158677 -1.868756 0.552519 0.188418 5.300000
2.640391 -0.253497 -1.793754 0.534856 0.288418 5.300000
2.488270 -0.341265 -1.718758 0.510323 0.388419 5.300000
2.340356 -0.421172 -1.643750 0.479055 0.488419 5.300000
2.196504 -0.492570 -1.568524 0.440920 0.592629 5.300000
2.056426 -0.555211 -1.497051 0.399901 0.593400 5.300000
1.920915 -0.609392 -1.422047 0.360844 0.593400 5.300000
1.790500 -0.655870 -1.347053 0.323784 0.593400 5.300000
1.665642 -0.695344 -1.272049 0.288730 0.593400 5.300000
1.546743 -0.728532 -1.197056 0.255689 0.593400 5.300000
1.434115 -0.756117 -1.122052 0.224655 0.593400 5.300000
1.328053 -0.778742 -1.047047 0.195623 0.593400 5.300000
1.228765 -0.797028 -0.972054 0.168603 0.593400 5.300000
1.136455 -0.811552 -0.897050 0.143587 0.593400 5.300000
1.051250 -0.822871 -0.822056 0.120584 0.593400 5.300000
0.973270 -0.831492 -0.747052 0.099585 0.593400 5.300000
0.902608 -0.837874 -0.672048 0.080591 0.593400 5.300000
0.839313 -0.842442 -0.597054 0.063607 0.593400 5.300000
0.783449 -0.845584 -0.522050 0.048636 0.593400 5.300000
0.735031 -0.847624 -0.447055 0.035659 0.593400 5.300000
0.694095 -0.848856 -0.372052 0.024695 0.593400 5.300000
0.660650 -0.849533 -0.297047 0.015746 0.593400 5.300000
0.634699 -0.849859 -0.222054 0.008794 0.593400 5.300000
0.616240 -0.849969 -0.147050 0.003861 0.593400 5.300000
