# Supplementary material for: Automatic Parking Controller with a Twin Artificial Neural Network Architecture
Source: Hindawi journal article supplement (doi:10.1155/2019/4801985), 2019-01-01
Supplement: f1 [file 4801985.f1.zip › data/data_109.txt]

6.500000 1.200000 0.000000 0.000000 0.000000 5.300000
6.496265 1.200000 -0.075004 0.000047 -0.031376 5.300000
6.485028 1.199999 -0.149996 0.000346 -0.070757 5.300000
6.466240 1.199983 -0.225000 0.001134 -0.110029 5.300000
6.440006 1.199933 -0.300003 0.002634 -0.149381 5.300000
6.406252 1.199811 -0.374996 0.005119 -0.188821 5.300000
6.364997 1.199519 -0.449999 0.008824 -0.228359 5.300000
6.316262 1.198966 -0.525003 0.013998 -0.267973 5.300000
6.260009 1.197989 -0.599997 0.020940 -0.307649 5.300000
6.196283 1.196376 -0.674999 0.029920 -0.347379 5.300000
6.125077 1.193852 -0.750002 0.041232 -0.387091 5.300000
6.046419 1.190069 -0.824999 0.055207 -0.427396 5.300000
5.960353 1.184591 -0.899998 0.072120 -0.459359 5.300000
5.866905 1.176923 -0.975002 0.091876 -0.483890 5.300000
5.766202 1.166512 -1.050001 0.114498 -0.508610 5.300000
5.658326 1.152716 -1.124998 0.140221 -0.533329 5.300000
5.543474 1.134811 -1.200001 0.169284 -0.558153 5.300000
5.421854 1.112010 -1.275003 0.201818 -0.578193 5.300000
5.293737 1.083467 -1.349997 0.236224 -0.562476 5.300000
5.159443 1.048658 -1.425001 0.270662 -0.532310 5.300000
5.019205 1.007153 -1.500004 0.304382 -0.498560 5.300000
4.873317 0.958648 -1.574997 0.337110 -0.464326 5.300000
4.722024 0.902892 -1.650000 0.368654 -0.430147 5.300000
4.565566 0.839657 -1.725004 0.398884 -0.396267 5.300000
4.404183 0.768845 -1.799996 0.427667 -0.362790 5.300000
4.238055 0.690330 -1.875000 0.454876 -0.329748 5.300000
4.067354 0.604065 -1.951836 0.480407 -0.297400 5.300000
3.892643 0.510328 -1.997535 0.503959 -0.262143 5.300000
3.718530 0.411902 -2.000000 0.524410 -0.221938 5.300000
3.546302 0.310228 -2.000000 0.541754 -0.187020 5.300000
3.375718 0.205829 -2.000000 0.555995 -0.144491 5.300000
3.206366 0.099415 -2.000000 0.564842 -0.060073 5.300000
3.037748 -0.007643 -1.982567 0.565584 0.040757 5.300000
2.873441 -0.111252 -1.904503 0.558410 0.140758 5.300000
2.714464 -0.209134 -1.829501 0.544154 0.240763 5.300000
2.560224 -0.300376 -1.754498 0.522856 0.340756 5.300000
2.410338 -0.384116 -1.679501 0.494799 0.440760 5.300000
2.264566 -0.459633 -1.604429 0.459970 0.542084 5.300000
2.122654 -0.526454 -1.533058 0.419230 0.593400 5.300000
1.984895 -0.584576 -1.457794 0.379211 0.593400 5.300000
1.851987 -0.634637 -1.382801 0.341191 0.593400 5.300000
1.724430 -0.677357 -1.307796 0.305184 0.593400 5.300000
1.602641 -0.713455 -1.232792 0.271191 0.593400 5.300000
1.486990 -0.743631 -1.157798 0.239189 0.593400 5.300000
1.377770 -0.768539 -1.082794 0.209209 0.593400 5.300000
1.275230 -0.788812 -1.007801 0.181229 0.593400 5.300000
1.179571 -0.805055 -0.932797 0.155260 0.593400 5.300000
1.090959 -0.817840 -0.857794 0.131294 0.593400 5.300000
1.009527 -0.827685 -0.782799 0.109339 0.593400 5.300000
0.935368 -0.835078 -0.707795 0.089388 0.593400 5.300000
0.868553 -0.840465 -0.632799 0.071451 0.593400 5.300000
0.809144 -0.844243 -0.557797 0.055517 0.593400 5.300000
0.757178 -0.846770 -0.482792 0.041592 0.593400 5.300000
0.712677 -0.848353 -0.407799 0.029674 0.593400 5.300000
0.675660 -0.849272 -0.332795 0.019762 0.593400 5.300000
0.646130 -0.849735 -0.257802 0.011858 0.593400 5.300000
0.624108 -0.849930 -0.182797 0.005959 0.593400 5.300000
0.609564 -0.849989 -0.107793 0.002072 0.593400 5.300000
