# Supplementary material for: Automatic Parking Controller with a Twin Artificial Neural Network Architecture
Source: Hindawi journal article supplement (doi:10.1155/2019/4801985), 2019-01-01
Supplement: f1 [file 4801985.f1.zip › data/data_110.txt]

6.600000 1.200000 0.000000 0.000000 0.000000 5.300000
6.596276 1.200000 -0.074999 0.000045 -0.028606 5.300000
6.585026 1.200000 -0.150000 0.000323 -0.065805 5.300000
6.566235 1.199983 -0.224997 0.001075 -0.102816 5.300000
6.540007 1.199937 -0.300000 0.002499 -0.139819 5.300000
6.506247 1.199813 -0.375005 0.004836 -0.176782 5.300000
6.465003 1.199550 -0.449999 0.008317 -0.213666 5.300000
6.416260 1.199028 -0.525004 0.013191 -0.250404 5.300000
6.360013 1.198102 -0.599999 0.019678 -0.286923 5.300000
6.296281 1.196598 -0.675003 0.028050 -0.323074 5.300000
6.225065 1.194228 -0.749999 0.038542 -0.358789 5.300000
6.146406 1.190700 -0.825001 0.051401 -0.390646 5.300000
6.060302 1.185620 -0.899999 0.066672 -0.415153 5.300000
5.966815 1.178557 -0.974999 0.084383 -0.439870 5.300000
5.866027 1.169009 -1.049999 0.104739 -0.464588 5.300000
5.758003 1.156396 -1.125005 0.127958 -0.489312 5.300000
5.642916 1.140073 -1.199998 0.154268 -0.514247 5.300000
5.520919 1.119277 -1.275004 0.183529 -0.525656 5.300000
5.392271 1.093328 -1.349998 0.214529 -0.520054 5.300000
5.257200 1.061615 -1.425004 0.246472 -0.504930 5.300000
5.115972 1.023631 -1.499998 0.278690 -0.483860 5.300000
4.968867 0.978958 -1.575003 0.310729 -0.459351 5.300000
4.816148 0.927200 -1.649998 0.342270 -0.433080 5.300000
4.658104 0.868103 -1.725001 0.373085 -0.406099 5.300000
4.494976 0.801378 -1.799998 0.402999 -0.379011 5.300000
4.327026 0.726854 -1.875004 0.431891 -0.352232 5.300000
4.154483 0.644366 -1.950079 0.459665 -0.326055 5.300000
3.978023 0.554031 -1.999265 0.486071 -0.296912 5.300000
3.802269 0.458436 -2.000000 0.509790 -0.261956 5.300000
3.628766 0.358975 -2.000000 0.530753 -0.232022 5.300000
3.457242 0.256118 -2.000000 0.549035 -0.195349 5.300000
3.287364 0.150566 -2.000000 0.561537 -0.106944 5.300000
3.118281 0.043510 -1.997155 0.565752 -0.007146 5.300000
2.951438 -0.062263 -1.940496 0.562763 0.092850 5.300000
2.790003 -0.163022 -1.865433 0.551863 0.192853 5.300000
2.633560 -0.257542 -1.790429 0.533923 0.292852 5.300000
2.481628 -0.344984 -1.715433 0.509076 0.392847 5.300000
2.333904 -0.424521 -1.640431 0.477511 0.492855 5.300000
2.190211 -0.495542 -1.565403 0.439114 0.593390 5.300000
2.050322 -0.557785 -1.493729 0.398128 0.593400 5.300000
1.915025 -0.611609 -1.418724 0.359159 0.593400 5.300000
1.784849 -0.657762 -1.343731 0.322189 0.593400 5.300000
1.660247 -0.696943 -1.268727 0.287225 0.593400 5.300000
1.541618 -0.729868 -1.193734 0.254271 0.593400 5.300000
1.429276 -0.757220 -1.118729 0.223326 0.593400 5.300000
1.323510 -0.779639 -1.043725 0.194383 0.593400 5.300000
1.224527 -0.797747 -0.968731 0.167453 0.593400 5.300000
1.132530 -0.812118 -0.893727 0.142525 0.593400 5.300000
1.047642 -0.823307 -0.818733 0.119611 0.593400 5.300000
0.969982 -0.831819 -0.743729 0.098701 0.593400 5.300000
0.899647 -0.838112 -0.668725 0.079797 0.593400 5.300000
0.836681 -0.842609 -0.593731 0.062902 0.593400 5.300000
0.781147 -0.845695 -0.518727 0.048019 0.593400 5.300000
0.733059 -0.847693 -0.443733 0.035131 0.593400 5.300000
0.692455 -0.848897 -0.368729 0.024256 0.593400 5.300000
0.659342 -0.849554 -0.293725 0.015394 0.593400 5.300000
0.633721 -0.849868 -0.218732 0.008533 0.593400 5.300000
0.615594 -0.849971 -0.143728 0.003688 0.593400 5.300000
