# Supplementary material for: Automatic Parking Controller with a Twin Artificial Neural Network Architecture
Source: Hindawi journal article supplement (doi:10.1155/2019/4801985), 2019-01-01
Supplement: f1 [file 4801985.f1.zip › data/data_111.txt]

6.700000 1.200000 0.000000 0.000000 0.000000 5.300000
6.696284 1.200000 -0.075001 0.000043 -0.025643 5.300000
6.685018 1.200000 -0.150003 0.000311 -0.060533 5.300000
6.666244 1.199984 -0.225005 0.001013 -0.095154 5.300000
6.640010 1.199941 -0.299995 0.002349 -0.129685 5.300000
6.606242 1.199824 -0.374997 0.004538 -0.164068 5.300000
6.565008 1.199577 -0.449998 0.007793 -0.198237 5.300000
6.516247 1.199086 -0.525000 0.012335 -0.232086 5.300000
6.460015 1.198229 -0.600001 0.018366 -0.265500 5.300000
6.396278 1.196816 -0.675002 0.026119 -0.298285 5.300000
6.325059 1.194621 -0.750004 0.035788 -0.328088 5.300000
6.246387 1.191354 -0.824994 0.047458 -0.352887 5.300000
6.160253 1.186672 -0.899996 0.061223 -0.377603 5.300000
6.066738 1.180199 -0.974998 0.077249 -0.402323 5.300000
5.965860 1.171459 -1.049999 0.095756 -0.427041 5.300000
5.857723 1.159937 -1.125000 0.116936 -0.452004 5.300000
5.742445 1.145004 -1.200002 0.140884 -0.471527 5.300000
5.620159 1.126029 -1.275004 0.167140 -0.479512 5.300000
5.491067 1.102388 -1.349994 0.195230 -0.480181 5.300000
5.355363 1.073455 -1.424996 0.224681 -0.474073 5.300000
5.213316 1.038718 -1.499997 0.255026 -0.462515 5.300000
5.065157 0.997613 -1.574999 0.285851 -0.446935 5.300000
4.911190 0.949750 -1.650000 0.316805 -0.428839 5.300000
4.751673 0.894687 -1.725001 0.347654 -0.409335 5.300000
4.586925 0.832099 -1.800003 0.378195 -0.389348 5.300000
4.417212 0.761667 -1.874994 0.408330 -0.369517 5.300000
4.242839 0.683101 -1.952549 0.437997 -0.350804 5.300000
4.064508 0.596379 -1.994029 0.466929 -0.328346 5.300000
3.887195 0.503943 -2.000000 0.493647 -0.298582 5.300000
3.712254 0.407007 -2.000000 0.518063 -0.274404 5.300000
3.539643 0.306003 -2.000000 0.540057 -0.236452 5.300000
3.369018 0.201663 -2.000000 0.556452 -0.156512 5.300000
3.199712 0.095196 -2.000000 0.564952 -0.055325 5.300000
3.031262 -0.011760 -1.978241 0.565337 0.044671 5.300000
2.867125 -0.115190 -1.901564 0.558010 0.144668 5.300000
2.708345 -0.212840 -1.826568 0.543433 0.244670 5.300000
2.554284 -0.303783 -1.751571 0.521903 0.344672 5.300000
2.404563 -0.387234 -1.676570 0.493557 0.444670 5.300000
2.258953 -0.462406 -1.601413 0.458454 0.547480 5.300000
2.117183 -0.528888 -1.530098 0.417627 0.593400 5.300000
1.979604 -0.586680 -1.454862 0.377687 0.593400 5.300000
1.846897 -0.636440 -1.379868 0.339745 0.593400 5.300000
1.719558 -0.678887 -1.304864 0.303817 0.593400 5.300000
1.598002 -0.714741 -1.229859 0.269902 0.593400 5.300000
1.482597 -0.744700 -1.154866 0.237979 0.593400 5.300000
1.373634 -0.769414 -1.079862 0.208079 0.593400 5.300000
1.271358 -0.789520 -1.004868 0.180176 0.593400 5.300000
1.175972 -0.805617 -0.929864 0.154284 0.593400 5.300000
1.087639 -0.818277 -0.854862 0.130398 0.593400 5.300000
1.006490 -0.828017 -0.779866 0.108522 0.593400 5.300000
0.932618 -0.835323 -0.704862 0.088649 0.593400 5.300000
0.866091 -0.840641 -0.629868 0.070790 0.593400 5.300000
0.806973 -0.844363 -0.554864 0.054933 0.593400 5.300000
0.755299 -0.846849 -0.479860 0.041088 0.593400 5.300000
0.711089 -0.848399 -0.404866 0.029249 0.593400 5.300000
0.674364 -0.849296 -0.329862 0.019416 0.593400 5.300000
0.645128 -0.849748 -0.254869 0.011589 0.593400 5.300000
0.623401 -0.849934 -0.179864 0.005770 0.593400 5.300000
0.609153 -0.849990 -0.104860 0.001961 0.593400 5.300000
