# Supplementary material for: Automatic Parking Controller with a Twin Artificial Neural Network Architecture
Source: Hindawi journal article supplement (doi:10.1155/2019/4801985), 2019-01-01
Supplement: f1 [file 4801985.f1.zip › data/data_112.txt]

6.800000 1.200000 0.000000 0.000000 0.000000 5.300000
6.796288 1.200000 -0.075000 0.000037 -0.022556 5.300000
6.785015 1.200000 -0.149999 0.000290 -0.055069 5.300000
6.766246 1.199985 -0.225000 0.000945 -0.087220 5.300000
6.740015 1.199944 -0.299999 0.002190 -0.119224 5.300000
6.706241 1.199843 -0.375002 0.004233 -0.151002 5.300000
6.665012 1.199602 -0.449998 0.007257 -0.182472 5.300000
6.616246 1.199149 -0.525001 0.011464 -0.213504 5.300000
6.560015 1.198352 -0.599998 0.017038 -0.243990 5.300000
6.496267 1.197044 -0.674999 0.024165 -0.270980 5.300000
6.425053 1.195016 -0.750005 0.032927 -0.295712 5.300000
6.346355 1.192020 -0.824998 0.043470 -0.320428 5.300000
6.260213 1.187742 -0.900004 0.055955 -0.345149 5.300000
6.166648 1.181824 -0.974998 0.070583 -0.369870 5.300000
6.065719 1.173834 -1.050002 0.087545 -0.394778 5.300000
5.957486 1.163294 -1.124997 0.106931 -0.415676 5.300000
5.842039 1.149641 -1.200000 0.128581 -0.429488 5.300000
5.719515 1.132332 -1.275006 0.152295 -0.438699 5.300000
5.590044 1.110764 -1.349999 0.177847 -0.443096 5.300000
5.453832 1.084379 -1.425005 0.204949 -0.442609 5.300000
5.311082 1.052580 -1.499998 0.233307 -0.437711 5.300000
5.162043 1.014851 -1.575003 0.262586 -0.429488 5.300000
5.006972 0.970654 -1.650006 0.292537 -0.418760 5.300000
4.846164 0.919528 -1.725001 0.322928 -0.406576 5.300000
4.679904 0.861020 -1.800006 0.353623 -0.393789 5.300000
4.508547 0.794729 -1.875000 0.384519 -0.381225 5.300000
4.332410 0.720225 -1.950043 0.415605 -0.369624 5.300000
4.152334 0.637361 -1.999461 0.446691 -0.354735 5.300000
3.973199 0.548261 -2.000000 0.476128 -0.330990 5.300000
3.796740 0.454126 -2.000000 0.503722 -0.313195 5.300000
3.622857 0.355313 -2.000000 0.529290 -0.284139 5.300000
3.451329 0.252475 -2.000000 0.549520 -0.201562 5.300000
3.281480 0.146873 -2.000000 0.561792 -0.103694 5.300000
3.112456 0.039794 -1.996738 0.565989 -0.003688 5.300000
2.945767 -0.065840 -1.938507 0.562543 0.096311 5.300000
2.784520 -0.166400 -1.862836 0.551347 0.196309 5.300000
2.628226 -0.260690 -1.787837 0.533181 0.296306 5.300000
2.476444 -0.347862 -1.712836 0.508104 0.396314 5.300000
2.328862 -0.427131 -1.637837 0.476297 0.496312 5.300000
2.185299 -0.497853 -1.563026 0.437700 0.593400 5.300000
2.045561 -0.559784 -1.491133 0.396746 0.593400 5.300000
1.910433 -0.613330 -1.416129 0.357846 0.593400 5.300000
1.780442 -0.659231 -1.341136 0.320947 0.593400 5.300000
1.656041 -0.698183 -1.266132 0.286052 0.593400 5.300000
1.537623 -0.730903 -1.191138 0.253166 0.593400 5.300000
1.425505 -0.758074 -1.116134 0.222290 0.593400 5.300000
1.319972 -0.780333 -1.041131 0.193418 0.593400 5.300000
1.221227 -0.798302 -0.966136 0.166557 0.593400 5.300000
1.129474 -0.812555 -0.891132 0.141699 0.593400 5.300000
1.044834 -0.823644 -0.816138 0.118854 0.593400 5.300000
0.967425 -0.832072 -0.741134 0.098013 0.593400 5.300000
0.897344 -0.838296 -0.666129 0.079180 0.593400 5.300000
0.834634 -0.842738 -0.591136 0.062354 0.593400 5.300000
0.779358 -0.845780 -0.516132 0.047539 0.593400 5.300000
0.731530 -0.847746 -0.441139 0.034721 0.593400 5.300000
0.691185 -0.848928 -0.366134 0.023915 0.593400 5.300000
0.658331 -0.849569 -0.291130 0.015123 0.593400 5.300000
0.632968 -0.849875 -0.216136 0.008332 0.593400 5.300000
0.615099 -0.849973 -0.141132 0.003556 0.593400 5.300000
