# Supplementary material for: Automatic Parking Controller with a Twin Artificial Neural Network Architecture
Source: Hindawi journal article supplement (doi:10.1155/2019/4801985), 2019-01-01
Supplement: f1 [file 4801985.f1.zip › data/data_113.txt]

6.900000 1.200000 0.000000 0.000000 0.000000 5.300000
6.896294 1.200000 -0.075000 0.000036 -0.019510 5.300000
6.885015 1.200000 -0.150000 0.000270 -0.049702 5.300000
6.866248 1.199985 -0.224999 0.000881 -0.079462 5.300000
6.840008 1.199947 -0.299999 0.002040 -0.109021 5.300000
6.806244 1.199851 -0.374999 0.003938 -0.138311 5.300000
6.765012 1.199636 -0.449999 0.006735 -0.167231 5.300000
6.716247 1.199209 -0.524999 0.010621 -0.194757 5.300000
6.660014 1.198471 -0.599998 0.015725 -0.219580 5.300000
6.596264 1.197271 -0.674998 0.022168 -0.244307 5.300000
6.525050 1.195412 -0.749998 0.030115 -0.269022 5.300000
6.446339 1.192674 -0.824998 0.039738 -0.293741 5.300000
6.360186 1.188759 -0.899998 0.051214 -0.318474 5.300000
6.266583 1.183338 -0.974998 0.064716 -0.343056 5.300000
6.165611 1.176021 -1.049997 0.080281 -0.362590 5.300000
6.057280 1.166343 -1.124997 0.097892 -0.379060 5.300000
5.941715 1.153860 -1.199997 0.117503 -0.392421 5.300000
5.818980 1.138040 -1.274997 0.139049 -0.402406 5.300000
5.689223 1.118343 -1.349997 0.162375 -0.408812 5.300000
5.552588 1.094209 -1.424996 0.187327 -0.411808 5.300000
5.409275 1.065085 -1.499996 0.213701 -0.411598 5.300000
5.259489 1.030401 -1.574996 0.241293 -0.408677 5.300000
5.103485 0.989637 -1.649996 0.269913 -0.403904 5.300000
4.941537 0.942237 -1.724996 0.299430 -0.397959 5.300000
4.773941 0.887702 -1.799995 0.329738 -0.391687 5.300000
4.601047 0.825514 -1.874995 0.360820 -0.385923 5.300000
4.423195 0.755137 -1.952923 0.392743 -0.381962 5.300000
4.241258 0.676259 -1.992454 0.425335 -0.374125 5.300000
4.060461 0.590870 -2.000000 0.456846 -0.356463 5.300000
3.882343 0.499940 -2.000000 0.487055 -0.344188 5.300000
3.706998 0.403743 -2.000000 0.516101 -0.325756 5.300000
3.534327 0.302829 -2.000000 0.540545 -0.253063 5.300000
3.363766 0.198390 -2.000000 0.556895 -0.152208 5.300000
3.194465 0.091882 -1.999950 0.564886 -0.052208 5.300000
3.026035 -0.015083 -1.974079 0.565064 0.047791 5.300000
2.862094 -0.118321 -1.899227 0.557701 0.147791 5.300000
2.703470 -0.215791 -1.824227 0.542852 0.247791 5.300000
2.549550 -0.306505 -1.749227 0.521131 0.347791 5.300000
2.399963 -0.389706 -1.674227 0.492565 0.447790 5.300000
2.254480 -0.464602 -1.598991 0.457229 0.552073 5.300000
2.112822 -0.530820 -1.527716 0.416350 0.593400 5.300000
1.975387 -0.588350 -1.452521 0.376474 0.593400 5.300000
1.842840 -0.637871 -1.377528 0.338593 0.593400 5.300000
1.715675 -0.680102 -1.302524 0.302728 0.593400 5.300000
1.594307 -0.715761 -1.227520 0.268876 0.593400 5.300000
1.479099 -0.745548 -1.152526 0.237016 0.593400 5.300000
1.370341 -0.770108 -1.077522 0.207179 0.593400 5.300000
1.268276 -0.790081 -1.002528 0.179337 0.593400 5.300000
1.173108 -0.806061 -0.927524 0.153508 0.593400 5.300000
1.084998 -0.818622 -0.852523 0.129686 0.593400 5.300000
1.004075 -0.828280 -0.777526 0.107872 0.593400 5.300000
0.930432 -0.835517 -0.702522 0.088061 0.593400 5.300000
0.864135 -0.840778 -0.627528 0.070264 0.593400 5.300000
0.805248 -0.844457 -0.552524 0.054470 0.593400 5.300000
0.753807 -0.846911 -0.477519 0.040689 0.593400 5.300000
0.709829 -0.848436 -0.402526 0.028912 0.593400 5.300000
0.673337 -0.849315 -0.327522 0.019142 0.593400 5.300000
0.644336 -0.849757 -0.252529 0.011377 0.593400 5.300000
0.622843 -0.849937 -0.177524 0.005621 0.593400 5.300000
0.608834 -0.849991 -0.102521 0.001876 0.593400 5.300000
