# Supplementary material for: Automatic Parking Controller with a Twin Artificial Neural Network Architecture
Source: Hindawi journal article supplement (doi:10.1155/2019/4801985), 2019-01-01
Supplement: f1 [file 4801985.f1.zip › data/data_114.txt]

7.000000 1.200000 0.000000 -0.000000 0.000000 5.300000
6.996302 1.200000 -0.075002 0.000035 -0.016652 5.300000
6.984999 1.200000 -0.150003 0.000251 -0.044338 5.300000
6.966254 1.199986 -0.225000 0.000820 -0.071725 5.300000
6.940001 1.199950 -0.299997 0.001898 -0.098951 5.300000
6.906256 1.199860 -0.374998 0.003640 -0.124392 5.300000
6.864997 1.199658 -0.450000 0.006185 -0.149081 5.300000
6.816254 1.199275 -0.525002 0.009694 -0.173801 5.300000
6.760009 1.198600 -0.600004 0.014309 -0.198521 5.300000
6.696267 1.197511 -0.675000 0.020190 -0.223237 5.300000
6.625035 1.195821 -0.749997 0.027505 -0.247951 5.300000
6.546325 1.193307 -0.824999 0.036409 -0.271975 5.300000
6.460148 1.189718 -0.900000 0.046995 -0.293177 5.300000
6.366532 1.184743 -0.975002 0.059324 -0.312645 5.300000
6.265507 1.178038 -1.050004 0.073459 -0.330188 5.300000
6.157120 1.169197 -1.125006 0.089428 -0.345552 5.300000
6.041427 1.157799 -1.199997 0.107235 -0.358526 5.300000
5.918528 1.143350 -1.274999 0.126844 -0.368957 5.300000
5.788515 1.125372 -1.350000 0.148176 -0.376797 5.300000
5.651535 1.103320 -1.425002 0.171138 -0.382152 5.300000
5.507738 1.076654 -1.500004 0.195606 -0.385247 5.300000
5.357317 1.044829 -1.575006 0.221475 -0.386518 5.300000
5.200509 1.007284 -1.649997 0.248639 -0.386501 5.300000
5.037559 0.963439 -1.724999 0.277036 -0.385842 5.300000
4.868766 0.912731 -1.800001 0.306641 -0.385340 5.300000
4.694470 0.854577 -1.875002 0.337513 -0.385815 5.300000
4.515058 0.788351 -1.950134 0.369793 -0.388344 5.300000
4.331472 0.713611 -1.999411 0.403444 -0.388184 5.300000
4.148790 0.632008 -2.000000 0.436677 -0.377156 5.300000
3.968966 0.544483 -2.000000 0.469147 -0.371310 5.300000
3.792062 0.451206 -2.000000 0.501355 -0.371425 5.300000
3.618120 0.352503 -2.000000 0.529557 -0.295600 5.300000
3.446624 0.249609 -2.000000 0.549939 -0.200908 5.300000
3.276827 0.143931 -2.000000 0.562098 -0.100911 5.300000
3.107894 0.036909 -1.999668 0.566059 -0.000914 5.300000
2.941213 -0.068716 -1.936624 0.562296 0.099090 5.300000
2.780104 -0.169102 -1.860749 0.550973 0.199091 5.300000
2.623946 -0.263220 -1.785753 0.532558 0.299088 5.300000
2.472291 -0.350169 -1.710756 0.507320 0.399086 5.300000
2.324817 -0.429214 -1.635754 0.475307 0.499093 5.300000
2.181356 -0.499700 -1.561169 0.436556 0.593400 5.300000
2.041740 -0.561382 -1.489048 0.395637 0.593400 5.300000
1.906747 -0.614706 -1.414044 0.356793 0.593400 5.300000
1.776906 -0.660404 -1.339050 0.319950 0.593400 5.300000
1.652667 -0.699175 -1.264046 0.285111 0.593400 5.300000
1.534419 -0.731731 -1.189053 0.252280 0.593400 5.300000
1.422481 -0.758757 -1.114049 0.221460 0.593400 5.300000
1.317134 -0.780887 -1.039047 0.192644 0.593400 5.300000
1.218581 -0.798745 -0.964051 0.165839 0.593400 5.300000
1.127025 -0.812904 -0.889047 0.141037 0.593400 5.300000
1.042585 -0.823913 -0.814053 0.118248 0.593400 5.300000
0.965377 -0.832273 -0.739049 0.097462 0.593400 5.300000
0.895500 -0.838441 -0.664044 0.078686 0.593400 5.300000
0.832996 -0.842841 -0.589051 0.061915 0.593400 5.300000
0.777927 -0.845848 -0.514047 0.047155 0.593400 5.300000
0.730308 -0.847788 -0.439054 0.034394 0.593400 5.300000
0.690171 -0.848952 -0.364049 0.023644 0.593400 5.300000
0.657525 -0.849581 -0.289045 0.014907 0.593400 5.300000
0.632371 -0.849879 -0.214051 0.008172 0.593400 5.300000
0.614708 -0.849975 -0.139047 0.003451 0.593400 5.300000
