# Supplementary material for: Automatic Parking Controller with a Twin Artificial Neural Network Architecture
Source: Hindawi journal article supplement (doi:10.1155/2019/4801985), 2019-01-01
Supplement: f1 [file 4801985.f1.zip › data/data_115.txt]

7.100000 1.200000 0.000000 0.000000 0.000000 5.300000
7.096311 1.200000 -0.074999 0.000034 -0.013498 5.300000
7.084988 1.200000 -0.149999 0.000233 -0.037344 5.300000
7.066259 1.199986 -0.224998 0.000739 -0.062050 5.300000
7.039997 1.199962 -0.299997 0.001707 -0.086743 5.300000
7.006259 1.199878 -0.374996 0.003286 -0.111385 5.300000
6.964998 1.199696 -0.449996 0.005620 -0.135862 5.300000
6.916254 1.199347 -0.524998 0.008849 -0.159671 5.300000
6.860000 1.198729 -0.600004 0.013119 -0.182794 5.300000
6.796266 1.197727 -0.675003 0.018555 -0.205179 5.300000
6.725024 1.196168 -0.750003 0.025273 -0.226660 5.300000
6.646315 1.193863 -0.825002 0.033394 -0.247084 5.300000
6.560122 1.190571 -0.900001 0.043020 -0.266282 5.300000
6.466496 1.186025 -0.975000 0.054203 -0.284060 5.300000
6.365425 1.179895 -1.050000 0.067034 -0.300259 5.300000
6.256977 1.171838 -1.124999 0.081536 -0.314715 5.300000
6.141191 1.161435 -1.199998 0.097731 -0.327334 5.300000
6.018149 1.148279 -1.274997 0.115594 -0.338034 5.300000
5.887920 1.131875 -1.349997 0.135116 -0.346855 5.300000
5.750655 1.111743 -1.424996 0.156238 -0.353925 5.300000
5.606445 1.087351 -1.499994 0.178912 -0.359474 5.300000
5.455505 1.058184 -1.575005 0.203089 -0.363871 5.300000
5.297995 1.023632 -1.650004 0.228734 -0.367585 5.300000
5.134179 0.983164 -1.725003 0.255866 -0.371253 5.300000
4.964322 0.936119 -1.800002 0.284529 -0.375612 5.300000
4.788775 0.881889 -1.875001 0.314859 -0.381578 5.300000
4.607876 0.819747 -1.952867 0.347138 -0.391099 5.300000
4.422589 0.749131 -1.993457 0.381375 -0.397375 5.300000
4.238316 0.671513 -2.000000 0.415826 -0.393034 5.300000
4.056778 0.587603 -2.000000 0.450180 -0.394113 5.300000
3.878251 0.497477 -2.000000 0.484863 -0.394973 5.300000
3.702852 0.401390 -2.000000 0.516481 -0.334908 5.300000
3.530242 0.300374 -2.000000 0.541055 -0.250918 5.300000
3.359721 0.195872 -2.000000 0.557146 -0.149839 5.300000
3.190426 0.089317 -2.000000 0.565071 -0.049840 5.300000
3.022022 -0.017625 -1.971739 0.565027 0.050158 5.300000
2.858281 -0.120705 -1.897447 0.557427 0.150163 5.300000
2.699771 -0.218019 -1.822447 0.542415 0.250157 5.300000
2.545953 -0.308568 -1.747448 0.520524 0.350160 5.300000
2.396465 -0.391582 -1.672449 0.491801 0.450165 5.300000
2.251079 -0.466264 -1.597142 0.456297 0.555710 5.300000
2.109512 -0.532283 -1.525900 0.415381 0.593400 5.300000
1.972187 -0.589613 -1.450744 0.375553 0.593400 5.300000
1.839762 -0.638954 -1.375751 0.337720 0.593400 5.300000
1.712730 -0.681020 -1.300746 0.301902 0.593400 5.300000
1.591504 -0.716532 -1.225743 0.268098 0.593400 5.300000
1.476446 -0.746188 -1.150748 0.236286 0.593400 5.300000
1.367844 -0.770632 -1.075744 0.206496 0.593400 5.300000
1.265939 -0.790505 -1.000750 0.178702 0.593400 5.300000
1.170937 -0.806397 -0.925746 0.152920 0.593400 5.300000
1.082996 -0.818882 -0.850747 0.129146 0.593400 5.300000
1.002245 -0.828478 -0.775748 0.107380 0.593400 5.300000
0.928776 -0.835663 -0.700744 0.087616 0.593400 5.300000
0.862654 -0.840882 -0.625751 0.069867 0.593400 5.300000
0.803943 -0.844528 -0.550746 0.054120 0.593400 5.300000
0.752679 -0.846957 -0.475742 0.040386 0.593400 5.300000
0.708878 -0.848463 -0.400749 0.028657 0.593400 5.300000
0.672562 -0.849329 -0.325745 0.018936 0.593400 5.300000
0.643740 -0.849764 -0.250751 0.011216 0.593400 5.300000
0.622423 -0.849939 -0.175747 0.005509 0.593400 5.300000
0.608595 -0.849992 -0.100744 0.001812 0.593400 5.300000
