# Supplementary material for: Automatic Parking Controller with a Twin Artificial Neural Network Architecture
Source: Hindawi journal article supplement (doi:10.1155/2019/4801985), 2019-01-01
Supplement: f1 [file 4801985.f1.zip › data/data_116.txt]

7.200000 1.200000 -0.000000 0.000000 0.000000 5.300000
7.196318 1.200000 -0.075001 0.000029 -0.011392 5.300000
7.184984 1.200000 -0.150002 0.000216 -0.032761 5.300000
7.166265 1.199986 -0.224998 0.000683 -0.055796 5.300000
7.139987 1.199964 -0.300004 0.001573 -0.078612 5.300000
7.106257 1.199885 -0.375001 0.003023 -0.101113 5.300000
7.064988 1.199713 -0.449996 0.005164 -0.123245 5.300000
7.016259 1.199398 -0.525004 0.008126 -0.144911 5.300000
6.959996 1.198829 -0.599999 0.012028 -0.165995 5.300000
6.896271 1.197912 -0.674997 0.016997 -0.186378 5.300000
6.825021 1.196485 -0.750002 0.023131 -0.205958 5.300000
6.746313 1.194385 -0.824998 0.030529 -0.224588 5.300000
6.660101 1.191374 -0.900000 0.039295 -0.242157 5.300000
6.566453 1.187223 -0.975000 0.049490 -0.258521 5.300000
6.465350 1.181624 -1.050001 0.061173 -0.273585 5.300000
6.356855 1.174270 -1.125002 0.074393 -0.287248 5.300000
6.240994 1.164787 -1.199998 0.089169 -0.299475 5.300000
6.117828 1.152765 -1.275004 0.105517 -0.310250 5.300000
5.987441 1.137781 -1.350001 0.123438 -0.319652 5.300000
5.849918 1.119363 -1.424996 0.142910 -0.327824 5.300000
5.705387 1.097031 -1.500004 0.163927 -0.335007 5.300000
5.553991 1.070235 -1.574999 0.186495 -0.341530 5.300000
5.395914 1.038445 -1.649997 0.210625 -0.347882 5.300000
5.231355 1.001048 -1.725002 0.236385 -0.354610 5.300000
5.060604 0.957445 -1.799999 0.263884 -0.362490 5.300000
4.883932 0.906924 -1.875004 0.293318 -0.372463 5.300000
4.701745 0.848762 -1.950542 0.325021 -0.385939 5.300000
4.515014 0.782289 -1.999050 0.359163 -0.397726 5.300000
4.328956 0.708719 -2.000000 0.394082 -0.399617 5.300000
4.145674 0.628694 -2.000000 0.429415 -0.406781 5.300000
3.965374 0.542157 -2.000000 0.465852 -0.421335 5.300000
3.788349 0.449114 -2.000000 0.501314 -0.388349 5.300000
3.614440 0.350348 -2.000000 0.530116 -0.298507 5.300000
3.442990 0.247380 -2.000000 0.550286 -0.198809 5.300000
3.273227 0.141658 -2.000000 0.562271 -0.098815 5.300000
3.104279 0.034618 -1.996227 0.565822 0.001191 5.300000
2.937786 -0.070889 -1.934800 0.562073 0.101194 5.300000
2.776774 -0.171140 -1.859180 0.550677 0.201190 5.300000
2.620718 -0.265127 -1.784176 0.532093 0.301193 5.300000
2.469146 -0.351908 -1.709180 0.506727 0.401190 5.300000
2.321760 -0.430791 -1.634177 0.474562 0.501192 5.300000
2.178379 -0.501090 -1.559791 0.435688 0.593400 5.300000
2.038856 -0.562585 -1.487473 0.394801 0.593400 5.300000
1.903966 -0.615741 -1.412469 0.355999 0.593400 5.300000
1.774238 -0.661287 -1.337475 0.319199 0.593400 5.300000
1.650122 -0.699920 -1.262471 0.284401 0.593400 5.300000
1.532002 -0.732353 -1.187478 0.251612 0.593400 5.300000
1.420200 -0.759270 -1.112474 0.220833 0.593400 5.300000
1.314994 -0.781304 -1.037472 0.192061 0.593400 5.300000
1.216586 -0.799078 -0.962476 0.165298 0.593400 5.300000
1.125178 -0.813165 -0.887472 0.140538 0.593400 5.300000
1.040889 -0.824114 -0.812478 0.117791 0.593400 5.300000
0.963833 -0.832424 -0.737474 0.097047 0.593400 5.300000
0.894111 -0.838551 -0.662469 0.078314 0.593400 5.300000
0.831763 -0.842918 -0.587476 0.061585 0.593400 5.300000
0.776849 -0.845898 -0.512472 0.046866 0.593400 5.300000
0.729388 -0.847820 -0.437479 0.034148 0.593400 5.300000
0.689409 -0.848970 -0.362474 0.023440 0.593400 5.300000
0.656921 -0.849590 -0.287470 0.014745 0.593400 5.300000
0.631923 -0.849883 -0.212476 0.008052 0.593400 5.300000
0.614418 -0.849976 -0.137472 0.003373 0.593400 5.300000
