# Supplementary material for: Automatic Parking Controller with a Twin Artificial Neural Network Architecture
Source: Hindawi journal article supplement (doi:10.1155/2019/4801985), 2019-01-01
Supplement: f1 [file 4801985.f1.zip › data/data_117.txt]

7.300000 1.200000 0.000000 0.000000 0.000000 5.300000
7.296318 1.200000 -0.075001 0.000028 -0.009720 5.300000
7.284978 1.200000 -0.150002 0.000201 -0.028842 5.300000
7.266273 1.199987 -0.224996 0.000623 -0.049867 5.300000
7.239990 1.199965 -0.300003 0.001447 -0.070679 5.300000
7.206262 1.199894 -0.374998 0.002773 -0.091216 5.300000
7.164999 1.199740 -0.449996 0.004734 -0.111395 5.300000
7.116257 1.199443 -0.524999 0.007441 -0.131150 5.300000
7.060002 1.198928 -0.599999 0.011014 -0.150360 5.300000
6.996259 1.198092 -0.675001 0.015547 -0.168956 5.300000
6.925026 1.196784 -0.750001 0.021141 -0.186822 5.300000
6.846297 1.194860 -0.825002 0.027890 -0.203870 5.300000
6.760094 1.192117 -0.899997 0.035872 -0.219997 5.300000
6.666416 1.188319 -0.975004 0.045166 -0.235122 5.300000
6.565301 1.183225 -1.049998 0.055815 -0.249174 5.300000
6.456748 1.176501 -1.124996 0.067886 -0.262123 5.300000
6.340834 1.167850 -1.200000 0.081388 -0.273936 5.300000
6.217563 1.156868 -1.274999 0.096360 -0.284671 5.300000
6.087034 1.143180 -1.350001 0.112824 -0.294417 5.300000
5.949317 1.126331 -1.424996 0.130781 -0.303323 5.300000
5.804508 1.105854 -1.500002 0.150261 -0.311648 5.300000
5.652747 1.081257 -1.574998 0.171297 -0.319716 5.300000
5.494169 1.051979 -1.649994 0.193943 -0.327973 5.300000
5.329003 1.017461 -1.724999 0.218303 -0.336991 5.300000
5.157443 0.977051 -1.799997 0.244523 -0.347504 5.300000
4.979818 0.930076 -1.874999 0.272866 -0.360505 5.300000
4.796434 0.875723 -1.952154 0.303736 -0.377958 5.300000
4.608265 0.813295 -1.996916 0.337329 -0.394174 5.300000
4.420711 0.743841 -2.000000 0.372126 -0.400484 5.300000
4.235726 0.667831 -2.000000 0.407860 -0.412693 5.300000
4.053644 0.585131 -2.000000 0.445323 -0.435203 5.300000
3.874850 0.495526 -2.000000 0.483747 -0.428681 5.300000
3.699445 0.399463 -2.000000 0.517044 -0.349161 5.300000
3.526893 0.298343 -2.000000 0.541473 -0.247892 5.300000
3.356394 0.193807 -2.000000 0.557348 -0.147892 5.300000
3.187141 0.087221 -2.000000 0.565348 -0.047886 5.300000
3.018806 -0.019655 -1.973454 0.565176 0.052112 5.300000
2.855140 -0.122671 -1.895989 0.557175 0.152110 5.300000
2.696731 -0.219837 -1.820987 0.542075 0.252107 5.300000
2.543000 -0.310265 -1.745986 0.520025 0.352110 5.300000
2.393592 -0.393110 -1.670985 0.491185 0.452113 5.300000
2.248289 -0.467632 -1.595619 0.455525 0.558776 5.300000
2.106790 -0.533482 -1.524405 0.414584 0.593400 5.300000
1.969557 -0.590649 -1.449281 0.374796 0.593400 5.300000
1.837232 -0.639841 -1.374288 0.337002 0.593400 5.300000
1.710309 -0.681773 -1.299283 0.301223 0.593400 5.300000
1.589201 -0.717164 -1.224281 0.267459 0.593400 5.300000
1.474266 -0.746712 -1.149285 0.235686 0.593400 5.300000
1.365793 -0.771061 -1.074282 0.205936 0.593400 5.300000
1.264019 -0.790851 -0.999288 0.178180 0.593400 5.300000
1.169154 -0.806671 -0.924284 0.152437 0.593400 5.300000
1.081353 -0.819095 -0.849285 0.128703 0.593400 5.300000
1.000743 -0.828640 -0.774286 0.106975 0.593400 5.300000
0.927416 -0.835782 -0.699282 0.087251 0.593400 5.300000
0.861439 -0.840967 -0.624288 0.069541 0.593400 5.300000
0.802873 -0.844585 -0.549284 0.053833 0.593400 5.300000
0.751754 -0.846995 -0.474279 0.040139 0.593400 5.300000
0.708098 -0.848485 -0.399286 0.028448 0.593400 5.300000
0.671927 -0.849341 -0.324282 0.018766 0.593400 5.300000
0.643252 -0.849770 -0.249289 0.011085 0.593400 5.300000
0.622081 -0.849941 -0.174284 0.005418 0.593400 5.300000
0.608400 -0.849992 -0.099282 0.001760 0.593400 5.300000
