# Supplementary material for: Automatic Parking Controller with a Twin Artificial Neural Network Architecture
Source: Hindawi journal article supplement (doi:10.1155/2019/4801985), 2019-01-01
Supplement: f1 [file 4801985.f1.zip › data/data_118.txt]

6.400000 1.300000 0.000000 0.000000 0.000000 5.300000
6.396268 1.300000 -0.074999 0.000052 -0.041933 5.300000
6.385027 1.299999 -0.149998 0.000417 -0.090080 5.300000
6.366234 1.299982 -0.224996 0.001370 -0.138677 5.300000
6.340006 1.299924 -0.300000 0.003211 -0.188130 5.300000
6.306252 1.299762 -0.375004 0.006277 -0.238853 5.300000
6.264994 1.299415 -0.450003 0.010917 -0.291459 5.300000
6.216260 1.298727 -0.525002 0.017531 -0.347069 5.300000
6.160020 1.297495 -0.600000 0.026608 -0.407843 5.300000
6.096306 1.295419 -0.674999 0.038827 -0.484309 5.300000
6.025134 1.292083 -0.749998 0.055209 -0.536892 5.300000
5.946550 1.286965 -0.824996 0.075053 -0.561686 5.300000
5.860629 1.279532 -0.900006 0.097745 -0.575761 5.300000
5.767440 1.269221 -0.975004 0.122649 -0.575869 5.300000
5.667133 1.255492 -1.050003 0.149524 -0.575801 5.300000
5.559847 1.237743 -1.125002 0.178398 -0.575481 5.300000
5.445769 1.215349 -1.200001 0.209261 -0.575291 5.300000
5.325173 1.187667 -1.274999 0.242118 -0.575862 5.300000
5.198317 1.153981 -1.349998 0.276981 -0.577008 5.300000
5.065586 1.113593 -1.424996 0.313820 -0.576733 5.300000
4.927390 1.065763 -1.500007 0.352629 -0.573739 5.300000
4.784217 1.009744 -1.575005 0.392813 -0.552476 5.300000
4.636455 0.945209 -1.650003 0.429548 -0.475370 5.300000
4.484221 0.872407 -1.725002 0.461533 -0.402419 5.300000
4.327570 0.791651 -1.800001 0.489523 -0.342428 5.300000
4.166508 0.703223 -1.875000 0.513895 -0.285841 5.300000
4.000988 0.607404 -1.950030 0.534669 -0.230571 5.300000
3.831316 0.504889 -2.000000 0.551518 -0.173371 5.300000
3.661588 0.398943 -2.000000 0.563677 -0.114057 5.300000
3.492980 0.291371 -2.000000 0.571281 -0.058451 5.300000
3.324946 0.182901 -2.000000 0.574385 -0.008740 5.300000
3.157025 0.074262 -2.000000 0.572993 0.038313 5.300000
2.989528 -0.033198 -1.963504 0.567107 0.087069 5.300000
2.826825 -0.135801 -1.885728 0.557271 0.170745 5.300000
2.669230 -0.232364 -1.810721 0.540776 0.270935 5.300000
2.516212 -0.321960 -1.735722 0.517413 0.370944 5.300000
2.367429 -0.403810 -1.660724 0.487239 0.470942 5.300000
2.222707 -0.477203 -1.585235 0.450164 0.580082 5.300000
2.081715 -0.541851 -1.513959 0.408986 0.593400 5.300000
1.945120 -0.597880 -1.438955 0.369467 0.593400 5.300000
1.813509 -0.646026 -1.363960 0.331960 0.593400 5.300000
1.687372 -0.687022 -1.288955 0.296456 0.593400 5.300000
1.567091 -0.721569 -1.213961 0.262962 0.593400 5.300000
1.453028 -0.750355 -1.138956 0.231474 0.593400 5.300000
1.345464 -0.774039 -1.063958 0.201994 0.593400 5.300000
1.244634 -0.793251 -0.988957 0.174523 0.593400 5.300000
1.150729 -0.808575 -0.913961 0.149054 0.593400 5.300000
1.063912 -0.820570 -0.838957 0.125589 0.593400 5.300000
0.984295 -0.829760 -0.763954 0.104145 0.593400 5.300000
0.911977 -0.836611 -0.688958 0.084697 0.593400 5.300000
0.847019 -0.841553 -0.613953 0.067257 0.593400 5.300000
0.789480 -0.844985 -0.538959 0.051829 0.593400 5.300000
0.739386 -0.847246 -0.463954 0.038408 0.593400 5.300000
0.696760 -0.848637 -0.388960 0.026993 0.593400 5.300000
0.661626 -0.849423 -0.313955 0.017588 0.593400 5.300000
0.633982 -0.849810 -0.238961 0.010186 0.593400 5.300000
0.613830 -0.849953 -0.163956 0.004795 0.593400 5.300000
0.601183 -0.849997 -0.088962 0.001409 0.593400 5.300000
