# Supplementary material for: Automatic Parking Controller with a Twin Artificial Neural Network Architecture
Source: Hindawi journal article supplement (doi:10.1155/2019/4801985), 2019-01-01
Supplement: f1 [file 4801985.f1.zip › data/data_119.txt]

6.500000 1.300000 0.000000 0.000000 0.000000 5.300000
6.496269 1.300000 -0.074996 0.000051 -0.036635 5.300000
6.485023 1.299999 -0.150005 0.000378 -0.080406 5.300000
6.466240 1.299983 -0.225002 0.001251 -0.124293 5.300000
6.440009 1.299932 -0.299999 0.002924 -0.168561 5.300000
6.406246 1.299785 -0.374996 0.005694 -0.213370 5.300000
6.365000 1.299465 -0.450004 0.009852 -0.258894 5.300000
6.316258 1.298848 -0.525000 0.015716 -0.305446 5.300000
6.260009 1.297745 -0.599998 0.023648 -0.353480 5.300000
6.196297 1.295920 -0.674998 0.034041 -0.403904 5.300000
6.125100 1.293030 -0.750002 0.047406 -0.458491 5.300000
6.046477 1.288647 -0.824999 0.064437 -0.516221 5.300000
5.960467 1.282209 -0.899997 0.085279 -0.543937 5.300000
5.867157 1.273110 -0.975004 0.109300 -0.570386 5.300000
5.766676 1.260734 -1.050001 0.136106 -0.575510 5.300000
5.659154 1.244419 -1.124998 0.164972 -0.575510 5.300000
5.544801 1.223564 -1.200000 0.195838 -0.575515 5.300000
5.423838 1.197497 -1.275003 0.228684 -0.575510 5.300000
5.296541 1.165517 -1.350000 0.263534 -0.575505 5.300000
5.163281 1.126925 -1.424997 0.300380 -0.575519 5.300000
5.024447 1.080957 -1.500003 0.338622 -0.556653 5.300000
4.880396 1.027230 -1.575001 0.374532 -0.491393 5.300000
4.731342 0.965733 -1.649999 0.407235 -0.436542 5.300000
4.577443 0.896525 -1.725002 0.437246 -0.387263 5.300000
4.418844 0.819669 -1.800003 0.464646 -0.340491 5.300000
4.255640 0.735235 -1.875000 0.489429 -0.294932 5.300000
4.087864 0.643421 -1.952615 0.511434 -0.249955 5.300000
3.915870 0.544645 -1.990402 0.530379 -0.202230 5.300000
3.744209 0.442161 -2.000000 0.545335 -0.151773 5.300000
3.573826 0.337422 -2.000000 0.556366 -0.105200 5.300000
3.404419 0.231113 -2.000000 0.563804 -0.061260 5.300000
3.235615 0.123854 -2.000000 0.567815 -0.019729 5.300000
3.067017 0.016174 -1.991868 0.568204 0.025683 5.300000
2.901770 -0.088814 -1.920692 0.562495 0.124462 5.300000
2.741883 -0.188289 -1.845585 0.549330 0.224464 5.300000
2.586791 -0.281232 -1.770588 0.529114 0.324462 5.300000
2.436068 -0.366776 -1.695588 0.502105 0.424458 5.300000
2.289458 -0.444213 -1.620583 0.468296 0.524456 5.300000
2.146747 -0.512927 -1.548576 0.428050 0.593400 5.300000
2.008019 -0.572864 -1.473814 0.387587 0.593400 5.300000
1.874034 -0.624584 -1.398817 0.349143 0.593400 5.300000
1.745294 -0.668810 -1.323818 0.312708 0.593400 5.300000
1.622242 -0.706268 -1.248818 0.278281 0.593400 5.300000
1.505250 -0.737650 -1.173813 0.245859 0.593400 5.300000
1.394631 -0.763621 -1.098819 0.215448 0.593400 5.300000
1.290645 -0.784838 -1.023814 0.187040 0.593400 5.300000
1.193501 -0.801897 -0.948820 0.160634 0.593400 5.300000
1.103376 -0.815375 -0.873815 0.136248 0.593400 5.300000
1.020400 -0.825811 -0.798821 0.113862 0.593400 5.300000
0.944679 -0.833684 -0.723816 0.093485 0.593400 5.300000
0.876293 -0.839460 -0.648819 0.075111 0.593400 5.300000
0.815302 -0.843549 -0.573816 0.058752 0.593400 5.300000
0.761741 -0.846321 -0.498822 0.044395 0.593400 5.300000
0.715636 -0.848079 -0.423817 0.032050 0.593400 5.300000
0.677022 -0.849119 -0.348815 0.021708 0.593400 5.300000
0.645893 -0.849666 -0.273818 0.013377 0.593400 5.300000
0.622269 -0.849909 -0.198813 0.007052 0.593400 5.300000
0.606142 -0.849983 -0.123819 0.002734 0.593400 5.300000
