# Supplementary material for: Automatic Parking Controller with a Twin Artificial Neural Network Architecture
Source: Hindawi journal article supplement (doi:10.1155/2019/4801985), 2019-01-01
Supplement: f1 [file 4801985.f1.zip › data/data_120.txt]

6.600000 1.300000 0.000000 0.000000 0.000000 5.300000
6.596273 1.300000 -0.074999 0.000049 -0.032908 5.300000
6.585026 1.300000 -0.149998 0.000354 -0.073661 5.300000
6.566241 1.299984 -0.224996 0.001172 -0.114373 5.300000
6.540010 1.299937 -0.299998 0.002732 -0.155241 5.300000
6.506244 1.299798 -0.375004 0.005298 -0.196312 5.300000
6.465003 1.299507 -0.450003 0.009142 -0.237614 5.300000
6.416256 1.298927 -0.525002 0.014534 -0.279223 5.300000
6.360009 1.297913 -0.600001 0.021778 -0.321200 5.300000
6.296291 1.296234 -0.674999 0.031161 -0.363656 5.300000
6.225080 1.293597 -0.749998 0.043061 -0.406796 5.300000
6.146444 1.289647 -0.824997 0.057832 -0.451444 5.300000
6.060378 1.283890 -0.899995 0.075919 -0.489792 5.300000
5.966980 1.275805 -0.975005 0.097164 -0.514795 5.300000
5.866340 1.264772 -1.050003 0.121471 -0.539522 5.300000
5.758578 1.250126 -1.125002 0.149067 -0.565405 5.300000
5.643900 1.231109 -1.200001 0.179752 -0.575637 5.300000
5.522523 1.206985 -1.275000 0.212607 -0.575789 5.300000
5.394741 1.177072 -1.349999 0.247462 -0.574810 5.300000
5.260871 1.140629 -1.424998 0.283664 -0.554098 5.300000
5.121221 1.097216 -1.499996 0.318514 -0.508077 5.300000
4.976045 1.046618 -1.575005 0.351616 -0.465942 5.300000
4.825572 0.988667 -1.650004 0.383028 -0.425831 5.300000
4.670030 0.923254 -1.725003 0.412678 -0.386868 5.300000
4.509590 0.850275 -1.800002 0.440482 -0.348620 5.300000
4.344438 0.769758 -1.875001 0.466298 -0.310809 5.300000
4.174667 0.681700 -1.950165 0.490014 -0.273296 5.300000
4.000808 0.586507 -2.000000 0.511283 -0.233166 5.300000
3.827223 0.486990 -2.000000 0.529129 -0.188917 5.300000
3.655336 0.384745 -2.000000 0.543523 -0.148990 5.300000
3.484773 0.280313 -2.000000 0.554799 -0.112116 5.300000
3.315247 0.174190 -2.000000 0.563265 -0.078147 5.300000
3.146406 0.066889 -1.999808 0.568034 -0.026088 5.300000
2.978944 -0.039956 -1.956433 0.566097 0.077338 5.300000
2.816592 -0.142175 -1.880926 0.556428 0.177337 5.300000
2.659295 -0.238304 -1.805921 0.539499 0.277335 5.300000
2.506570 -0.327437 -1.730922 0.515672 0.377344 5.300000
2.358043 -0.408768 -1.655924 0.485083 0.477342 5.300000
2.213578 -0.481604 -1.580443 0.447559 0.586313 5.300000
2.072832 -0.545687 -1.509160 0.406396 0.593400 5.300000
1.936542 -0.601190 -1.434155 0.367007 0.593400 5.300000
1.805268 -0.648856 -1.359160 0.329628 0.593400 5.300000
1.679495 -0.689418 -1.284156 0.294252 0.593400 5.300000
1.559601 -0.723578 -1.209162 0.260888 0.593400 5.300000
1.445947 -0.752015 -1.134156 0.229527 0.593400 5.300000
1.338806 -0.775397 -1.059156 0.200176 0.593400 5.300000
1.238415 -0.794342 -0.984157 0.172832 0.593400 5.300000
1.144960 -0.809437 -0.909160 0.147492 0.593400 5.300000
1.058601 -0.821237 -0.834158 0.124157 0.593400 5.300000
0.979448 -0.830262 -0.759153 0.102841 0.593400 5.300000
0.907598 -0.836980 -0.684159 0.083519 0.593400 5.300000
0.843112 -0.841815 -0.609154 0.066209 0.593400 5.300000
0.786049 -0.845163 -0.534159 0.050910 0.593400 5.300000
0.736433 -0.847359 -0.459154 0.037617 0.593400 5.300000
0.694286 -0.848703 -0.384160 0.026331 0.593400 5.300000
0.659633 -0.849458 -0.309155 0.017054 0.593400 5.300000
0.632472 -0.849825 -0.234160 0.009781 0.593400 5.300000
0.612798 -0.849958 -0.159156 0.004519 0.593400 5.300000
0.600625 -0.849999 -0.084162 0.001259 0.593400 5.300000
