# Supplementary material for: Automatic Parking Controller with a Twin Artificial Neural Network Architecture
Source: Hindawi journal article supplement (doi:10.1155/2019/4801985), 2019-01-01
Supplement: f1 [file 4801985.f1.zip › data/data_121.txt]

6.700000 1.300000 0.000000 0.000000 0.000000 5.300000
6.696285 1.300000 -0.074999 0.000047 -0.030236 5.300000
6.685024 1.300000 -0.149998 0.000341 -0.068889 5.300000
6.666243 1.299984 -0.225001 0.001114 -0.107396 5.300000
6.640009 1.299941 -0.299996 0.002592 -0.145955 5.300000
6.606243 1.299811 -0.374997 0.005027 -0.184562 5.300000
6.565011 1.299526 -0.450002 0.008662 -0.223202 5.300000
6.516244 1.298990 -0.524995 0.013737 -0.261849 5.300000
6.460017 1.298028 -0.599999 0.020529 -0.300450 5.300000
6.396285 1.296449 -0.675002 0.029303 -0.338948 5.300000
6.325077 1.293974 -0.750001 0.040343 -0.377184 5.300000
6.246420 1.290277 -0.825000 0.053943 -0.415151 5.300000
6.160326 1.284930 -0.900000 0.070288 -0.442392 5.300000
6.066883 1.277476 -0.974998 0.089269 -0.467006 5.300000
5.966137 1.267357 -1.050001 0.111027 -0.491721 5.300000
5.858224 1.253994 -1.124996 0.135792 -0.516443 5.300000
5.743267 1.236658 -1.199997 0.163811 -0.541170 5.300000
5.621515 1.214582 -1.275002 0.195181 -0.558678 5.300000
5.493201 1.186991 -1.349994 0.228287 -0.545013 5.300000
5.358604 1.153318 -1.424998 0.261653 -0.520032 5.300000
5.217990 1.113144 -1.500002 0.294645 -0.490378 5.300000
5.071623 1.066092 -1.574995 0.326880 -0.458779 5.300000
4.919759 1.011908 -1.650000 0.358095 -0.426412 5.300000
4.762639 0.950358 -1.725000 0.388123 -0.393831 5.300000
4.600490 0.881296 -1.799996 0.416777 -0.361316 5.300000
4.433523 0.804590 -1.874999 0.443926 -0.329003 5.300000
4.261872 0.720212 -1.952778 0.469456 -0.297207 5.300000
4.086090 0.628352 -1.989675 0.493054 -0.262039 5.300000
3.910993 0.531879 -2.000000 0.513550 -0.222500 5.300000
3.737682 0.432069 -2.000000 0.530956 -0.187274 5.300000
3.565991 0.329490 -2.000000 0.545615 -0.155449 5.300000
3.395684 0.224635 -2.000000 0.557802 -0.125956 5.300000
3.226515 0.117947 -2.000000 0.566635 -0.067572 5.300000
3.058046 0.010461 -1.994618 0.568201 0.029869 5.300000
2.892993 -0.094358 -1.916595 0.561925 0.129874 5.300000
2.733367 -0.193487 -1.841523 0.548420 0.229872 5.300000
2.578530 -0.286055 -1.766531 0.527824 0.329869 5.300000
2.428041 -0.371177 -1.691527 0.500447 0.429870 5.300000
2.281645 -0.448146 -1.616523 0.466277 0.529884 5.300000
2.139131 -0.516390 -1.544829 0.425805 0.593400 5.300000
2.000645 -0.575866 -1.469755 0.385456 0.593400 5.300000
1.866931 -0.627161 -1.394760 0.347120 0.593400 5.300000
1.738487 -0.671004 -1.319759 0.310795 0.593400 5.300000
1.615755 -0.708114 -1.244761 0.276475 0.593400 5.300000
1.499099 -0.739188 -1.169756 0.244163 0.593400 5.300000
1.388835 -0.764885 -1.094762 0.213860 0.593400 5.300000
1.285214 -0.785862 -1.019757 0.185560 0.593400 5.300000
1.188445 -0.802713 -0.944762 0.159263 0.593400 5.300000
1.098702 -0.816012 -0.869758 0.134987 0.593400 5.300000
1.016116 -0.826299 -0.794764 0.112707 0.593400 5.300000
0.940791 -0.834047 -0.719758 0.092441 0.593400 5.300000
0.872804 -0.839721 -0.644760 0.074175 0.593400 5.300000
0.812215 -0.843729 -0.569759 0.057923 0.593400 5.300000
0.759058 -0.846439 -0.494764 0.043676 0.593400 5.300000
0.713356 -0.848151 -0.419760 0.031439 0.593400 5.300000
0.675147 -0.849160 -0.344756 0.021205 0.593400 5.300000
0.644421 -0.849685 -0.269761 0.012984 0.593400 5.300000
0.621201 -0.849915 -0.194756 0.006766 0.593400 5.300000
0.605480 -0.849985 -0.119761 0.002558 0.593400 5.300000
