# Supplementary material for: Automatic Parking Controller with a Twin Artificial Neural Network Architecture
Source: Hindawi journal article supplement (doi:10.1155/2019/4801985), 2019-01-01
Supplement: f1 [file 4801985.f1.zip › data/data_122.txt]

6.800000 1.300000 0.000000 0.000000 0.000000 5.300000
6.796294 1.300000 -0.075001 0.000045 -0.027702 5.300000
6.785016 1.300000 -0.150002 0.000319 -0.064402 5.300000
6.766241 1.299985 -0.225002 0.001059 -0.100866 5.300000
6.740016 1.299944 -0.300003 0.002466 -0.137306 5.300000
6.706244 1.299823 -0.375004 0.004776 -0.173679 5.300000
6.665009 1.299554 -0.450005 0.008209 -0.209942 5.300000
6.616251 1.299042 -0.524998 0.013002 -0.246000 5.300000
6.560015 1.298132 -0.599996 0.019391 -0.281769 5.300000
6.496268 1.296640 -0.674997 0.027622 -0.317089 5.300000
6.425073 1.294316 -0.749998 0.037931 -0.351808 5.300000
6.346386 1.290843 -0.824998 0.050533 -0.380007 5.300000
6.260288 1.285851 -0.899999 0.065385 -0.404711 5.300000
6.166797 1.278930 -0.975000 0.082640 -0.429430 5.300000
6.065981 1.269591 -1.050001 0.102497 -0.454155 5.300000
5.957935 1.257249 -1.125002 0.125164 -0.478869 5.300000
5.842789 1.241275 -1.200002 0.150862 -0.503437 5.300000
5.720722 1.220956 -1.275003 0.179209 -0.510854 5.300000
5.591943 1.195616 -1.350004 0.209241 -0.506011 5.300000
5.456696 1.164696 -1.425005 0.240241 -0.492540 5.300000
5.315213 1.127646 -1.499998 0.271624 -0.472976 5.300000
5.167782 1.084073 -1.574996 0.302903 -0.449686 5.300000
5.014648 1.033566 -1.649997 0.333755 -0.424236 5.300000
4.856083 0.975870 -1.724998 0.363900 -0.397698 5.300000
4.692318 0.910703 -1.799998 0.393161 -0.370729 5.300000
4.523629 0.837892 -1.874999 0.421374 -0.343774 5.300000
4.350193 0.757278 -1.950210 0.448439 -0.317213 5.300000
4.172731 0.669025 -2.000000 0.474040 -0.287659 5.300000
3.995790 0.575609 -2.000000 0.496949 -0.252031 5.300000
3.820972 0.478452 -2.000000 0.517061 -0.221194 5.300000
3.648015 0.378019 -2.000000 0.534770 -0.194060 5.300000
3.476761 0.274724 -2.000000 0.550467 -0.171374 5.300000
3.307011 0.168974 -2.000000 0.562934 -0.115479 5.300000
3.138178 0.061619 -1.999432 0.568229 -0.017910 5.300000
2.970847 -0.045090 -1.952901 0.565916 0.082238 5.300000
2.808767 -0.147040 -1.877253 0.555734 0.182237 5.300000
2.651718 -0.242841 -1.802252 0.538510 0.282241 5.300000
2.499192 -0.331617 -1.727252 0.514321 0.382239 5.300000
2.350871 -0.412544 -1.652251 0.483410 0.482241 5.300000
2.206595 -0.484952 -1.576837 0.445562 0.589906 5.300000
2.066044 -0.548600 -1.505485 0.404419 0.593400 5.300000
1.929989 -0.603703 -1.430480 0.365129 0.593400 5.300000
1.798974 -0.651003 -1.355486 0.327848 0.593400 5.300000
1.673481 -0.691235 -1.280481 0.292570 0.593400 5.300000
1.553885 -0.725099 -1.205486 0.259304 0.593400 5.300000
1.440543 -0.753272 -1.130482 0.228041 0.593400 5.300000
1.333727 -0.776423 -1.055479 0.198790 0.593400 5.300000
1.233672 -0.795166 -0.980482 0.171543 0.593400 5.300000
1.140563 -0.810088 -0.905483 0.146300 0.593400 5.300000
1.054554 -0.821740 -0.830483 0.123066 0.593400 5.300000
0.975757 -0.830641 -0.755478 0.101848 0.593400 5.300000
0.904267 -0.837257 -0.680484 0.082624 0.593400 5.300000
0.840142 -0.842011 -0.605479 0.065412 0.593400 5.300000
0.783444 -0.845295 -0.530485 0.050212 0.593400 5.300000
0.734193 -0.847442 -0.455479 0.037016 0.593400 5.300000
0.692412 -0.848751 -0.380486 0.025830 0.593400 5.300000
0.658126 -0.849483 -0.305481 0.016651 0.593400 5.300000
0.631335 -0.849836 -0.230484 0.009477 0.593400 5.300000
0.612032 -0.849962 -0.155481 0.004314 0.593400 5.300000
0.600225 -0.850000 -0.080487 0.001152 0.593400 5.300000
