# Supplementary material for: Automatic Parking Controller with a Twin Artificial Neural Network Architecture
Source: Hindawi journal article supplement (doi:10.1155/2019/4801985), 2019-01-01
Supplement: f1 [file 4801985.f1.zip › data/data_123.txt]

6.900000 1.300000 0.000000 0.000000 0.000000 5.300000
6.896298 1.300000 -0.075002 0.000039 -0.024996 5.300000
6.885013 1.300000 -0.150004 0.000309 -0.059603 5.300000
6.866252 1.299985 -0.224996 0.001006 -0.093901 5.300000
6.840006 1.299947 -0.299998 0.002328 -0.128106 5.300000
6.806247 1.299828 -0.375000 0.004509 -0.162149 5.300000
6.765009 1.299579 -0.450003 0.007731 -0.195945 5.300000
6.716250 1.299099 -0.524998 0.012236 -0.229401 5.300000
6.660012 1.298243 -0.599997 0.018208 -0.262372 5.300000
6.596269 1.296848 -0.674999 0.025883 -0.295059 5.300000
6.525069 1.294665 -0.750001 0.035433 -0.322365 5.300000
6.446371 1.291431 -0.825003 0.046920 -0.347033 5.300000
6.360255 1.286818 -0.900004 0.060458 -0.371754 5.300000
6.266717 1.280416 -0.974997 0.076257 -0.396471 5.300000
6.165841 1.271802 -1.049999 0.094498 -0.421190 5.300000
6.057683 1.260415 -1.125001 0.115410 -0.446392 5.300000
5.942381 1.245696 -1.200004 0.138925 -0.462649 5.300000
5.820049 1.226981 -1.274997 0.164616 -0.469800 5.300000
5.690889 1.203710 -1.349998 0.192050 -0.469896 5.300000
5.555089 1.175260 -1.425000 0.220783 -0.463264 5.300000
5.412887 1.141133 -1.500002 0.250343 -0.451427 5.300000
5.264525 1.100787 -1.575004 0.280338 -0.435501 5.300000
5.110273 1.053842 -1.649995 0.310397 -0.416915 5.300000
4.950380 0.999880 -1.724998 0.340279 -0.396684 5.300000
4.785141 0.938595 -1.800000 0.369759 -0.375664 5.300000
4.614809 0.869691 -1.875002 0.398687 -0.354474 5.300000
4.439622 0.792932 -1.953111 0.426992 -0.333919 5.300000
4.260246 0.708292 -1.989304 0.454367 -0.309367 5.300000
4.081758 0.618270 -2.000000 0.479404 -0.278643 5.300000
3.905372 0.523978 -2.000000 0.502013 -0.252363 5.300000
3.731072 0.425923 -2.000000 0.522594 -0.229953 5.300000
3.558726 0.324447 -2.000000 0.541463 -0.211378 5.300000
3.388215 0.219924 -2.000000 0.557503 -0.161065 5.300000
3.219060 0.113216 -2.000000 0.566760 -0.065692 5.300000
3.050598 0.005692 -1.986376 0.567909 0.034311 5.300000
2.885787 -0.098876 -1.913197 0.561511 0.134314 5.300000
2.726403 -0.197754 -1.838195 0.547638 0.234312 5.300000
2.571753 -0.289992 -1.763193 0.526768 0.334309 5.300000
2.421451 -0.374784 -1.688201 0.499067 0.434311 5.300000
2.275240 -0.451353 -1.613164 0.464604 0.534960 5.300000
2.132890 -0.519214 -1.541632 0.423971 0.593400 5.300000
1.994603 -0.578311 -1.466425 0.383712 0.593400 5.300000
1.861113 -0.629260 -1.391430 0.345465 0.593400 5.300000
1.732913 -0.672790 -1.316428 0.309229 0.593400 5.300000
1.610444 -0.709616 -1.241431 0.274998 0.593400 5.300000
1.494066 -0.740440 -1.166426 0.242775 0.593400 5.300000
1.384092 -0.765913 -1.091432 0.212560 0.593400 5.300000
1.280771 -0.786693 -1.016427 0.184351 0.593400 5.300000
1.184310 -0.803374 -0.941433 0.158142 0.593400 5.300000
1.094882 -0.816528 -0.866428 0.133956 0.593400 5.300000
1.012616 -0.826694 -0.791434 0.111763 0.593400 5.300000
0.937617 -0.834340 -0.716429 0.091589 0.593400 5.300000
0.869957 -0.839932 -0.641429 0.073411 0.593400 5.300000
0.809696 -0.843875 -0.566429 0.057248 0.593400 5.300000
0.756871 -0.846534 -0.491433 0.043090 0.593400 5.300000
0.711502 -0.848208 -0.416430 0.030943 0.593400 5.300000
0.673626 -0.849192 -0.341426 0.020798 0.593400 5.300000
0.643231 -0.849700 -0.266431 0.012665 0.593400 5.300000
0.620342 -0.849919 -0.191426 0.006536 0.593400 5.300000
0.604952 -0.849986 -0.116432 0.002417 0.593400 5.300000
