# Supplementary material for: Automatic Parking Controller with a Twin Artificial Neural Network Architecture
Source: Hindawi journal article supplement (doi:10.1155/2019/4801985), 2019-01-01
Supplement: f1 [file 4801985.f1.zip › data/data_124.txt]

7.000000 1.300000 0.000000 0.000000 0.000000 5.300000
6.996305 1.300000 -0.075000 0.000038 -0.022230 5.300000
6.985003 1.300000 -0.149999 0.000289 -0.054744 5.300000
6.966256 1.299986 -0.224999 0.000948 -0.086855 5.300000
6.939995 1.299950 -0.299999 0.002198 -0.118820 5.300000
6.906255 1.299837 -0.374998 0.004238 -0.150549 5.300000
6.864996 1.299603 -0.449998 0.007261 -0.181942 5.300000
6.816254 1.299152 -0.524997 0.011462 -0.212867 5.300000
6.760006 1.298355 -0.599997 0.017029 -0.243381 5.300000
6.696270 1.297047 -0.674997 0.024141 -0.269281 5.300000
6.625053 1.295024 -0.749996 0.032867 -0.293934 5.300000
6.546359 1.292027 -0.824995 0.043358 -0.318654 5.300000
6.460217 1.287759 -0.900005 0.055798 -0.343375 5.300000
6.366651 1.281861 -0.975005 0.070372 -0.368096 5.300000
6.265714 1.273901 -1.050005 0.087263 -0.392858 5.300000
6.157474 1.263393 -1.125004 0.106531 -0.412093 5.300000
6.042019 1.249802 -1.200004 0.127962 -0.424864 5.300000
5.919479 1.232582 -1.275004 0.151380 -0.432963 5.300000
5.789990 1.211161 -1.350003 0.176538 -0.435955 5.300000
5.653743 1.184987 -1.425003 0.203129 -0.434044 5.300000
5.510924 1.153491 -1.500003 0.230834 -0.427635 5.300000
5.361774 1.116190 -1.575002 0.259316 -0.417734 5.300000
5.206545 1.072566 -1.650002 0.288303 -0.405186 5.300000
5.045488 1.022224 -1.725001 0.317534 -0.390937 5.300000
4.878877 0.964725 -1.800001 0.346851 -0.375774 5.300000
4.707022 0.899730 -1.875001 0.376099 -0.360420 5.300000
4.530193 0.826883 -1.950114 0.405229 -0.345569 5.300000
4.349204 0.746117 -2.000000 0.433961 -0.327472 5.300000
4.168821 0.659509 -2.000000 0.460859 -0.301170 5.300000
3.990820 0.568323 -2.000000 0.485679 -0.279692 5.300000
3.815055 0.472901 -2.000000 0.508855 -0.262233 5.300000
3.641490 0.373542 -2.000000 0.530803 -0.249194 5.300000
3.470046 0.270552 -2.000000 0.550257 -0.197937 5.300000
3.300323 0.164754 -2.000000 0.563350 -0.115013 5.300000
3.131558 0.057391 -2.000000 0.568432 -0.013817 5.300000
2.964376 -0.049204 -1.951049 0.565678 0.086176 5.300000
2.802491 -0.150939 -1.874293 0.555178 0.186182 5.300000
2.645620 -0.246476 -1.799294 0.537687 0.286175 5.300000
2.493274 -0.334958 -1.724294 0.513236 0.386181 5.300000
2.345108 -0.415562 -1.649295 0.482048 0.486181 5.300000
2.200984 -0.487633 -1.573984 0.443954 0.591923 5.300000
2.060593 -0.550927 -1.502531 0.402833 0.593400 5.300000
1.924728 -0.605710 -1.427525 0.363623 0.593400 5.300000
1.793923 -0.652717 -1.352531 0.326419 0.593400 5.300000
1.668654 -0.692686 -1.277526 0.291222 0.593400 5.300000
1.549299 -0.726312 -1.202531 0.258035 0.593400 5.300000
1.436210 -0.754274 -1.127527 0.226851 0.593400 5.300000
1.329655 -0.777241 -1.052523 0.197679 0.593400 5.300000
1.229870 -0.795822 -0.977528 0.170511 0.593400 5.300000
1.137040 -0.810606 -0.902527 0.145345 0.593400 5.300000
1.051312 -0.822140 -0.827528 0.122193 0.593400 5.300000
0.972801 -0.830941 -0.752523 0.101051 0.593400 5.300000
0.901601 -0.837476 -0.677529 0.081907 0.593400 5.300000
0.837767 -0.842166 -0.602524 0.064775 0.593400 5.300000
0.781363 -0.845399 -0.527530 0.049654 0.593400 5.300000
0.732405 -0.847508 -0.452525 0.036537 0.593400 5.300000
0.690918 -0.848789 -0.377531 0.025430 0.593400 5.300000
0.656926 -0.849503 -0.302526 0.016329 0.593400 5.300000
0.630432 -0.849845 -0.227528 0.009236 0.593400 5.300000
0.611427 -0.849964 -0.152527 0.004152 0.593400 5.300000
0.599920 -0.850000 -0.077532 0.001071 0.593400 5.300000
