# Supplementary material for: Automatic Parking Controller with a Twin Artificial Neural Network Architecture
Source: Hindawi journal article supplement (doi:10.1155/2019/4801985), 2019-01-01
Supplement: f1 [file 4801985.f1.zip › data/data_125.txt]

7.100000 1.300000 0.000000 0.000000 0.000000 5.300000
7.096314 1.300000 -0.074999 0.000036 -0.019483 5.300000
7.084989 1.300000 -0.149998 0.000279 -0.049924 5.300000
7.066263 1.299986 -0.225003 0.000891 -0.079897 5.300000
7.039988 1.299953 -0.299997 0.002066 -0.109675 5.300000
7.006256 1.299853 -0.375002 0.003973 -0.139165 5.300000
6.964995 1.299626 -0.449995 0.006799 -0.168275 5.300000
6.916260 1.299205 -0.525000 0.010709 -0.196076 5.300000
6.860000 1.298458 -0.600003 0.015850 -0.220747 5.300000
6.796276 1.297255 -0.674998 0.022340 -0.245468 5.300000
6.725039 1.295374 -0.750001 0.030341 -0.270181 5.300000
6.646347 1.292620 -0.824999 0.040016 -0.294901 5.300000
6.560176 1.288672 -0.900001 0.051556 -0.319626 5.300000
6.466598 1.283227 -0.974997 0.065114 -0.343894 5.300000
6.365609 1.275848 -1.050000 0.080752 -0.363140 5.300000
6.257304 1.266143 -1.124995 0.098380 -0.378902 5.300000
6.141725 1.253595 -1.199998 0.117983 -0.391348 5.300000
6.019006 1.237725 -1.275003 0.139438 -0.400030 5.300000
5.889249 1.217976 -1.349996 0.162595 -0.404941 5.300000
5.752620 1.193837 -1.425001 0.187235 -0.405949 5.300000
5.609297 1.164757 -1.500001 0.213132 -0.403508 5.300000
5.459480 1.130217 -1.575000 0.240051 -0.398140 5.300000
5.303410 1.089699 -1.649999 0.267776 -0.390517 5.300000
5.141334 1.042747 -1.724998 0.296106 -0.381380 5.300000
4.973514 0.988888 -1.799998 0.324900 -0.371440 5.300000
4.800269 0.927683 -1.874997 0.354077 -0.361428 5.300000
4.621862 0.858717 -1.953511 0.383605 -0.352402 5.300000
4.439070 0.781759 -1.989258 0.413253 -0.339118 5.300000
4.257160 0.698876 -2.000000 0.441448 -0.318005 5.300000
4.077496 0.611006 -2.000000 0.468004 -0.301088 5.300000
3.900169 0.518529 -2.000000 0.493283 -0.288294 5.300000
3.725191 0.421675 -2.000000 0.517656 -0.279393 5.300000
3.552572 0.320669 -2.000000 0.540799 -0.258016 5.300000
3.382093 0.216097 -2.000000 0.558053 -0.162286 5.300000
3.212963 0.109338 -2.000000 0.566896 -0.062113 5.300000
3.044503 0.001798 -1.982098 0.567734 0.037893 5.300000
2.879993 -0.102517 -1.910514 0.561184 0.137892 5.300000
2.720782 -0.201176 -1.835512 0.546994 0.237890 5.300000
2.566299 -0.293155 -1.760516 0.525905 0.337887 5.300000
2.416147 -0.377677 -1.685514 0.497947 0.437892 5.300000
2.270081 -0.453927 -1.610413 0.463232 0.539665 5.300000
2.127863 -0.521478 -1.538993 0.422495 0.593400 5.300000
1.989739 -0.580271 -1.463740 0.382308 0.593400 5.300000
1.856430 -0.630942 -1.388746 0.344133 0.593400 5.300000
1.728427 -0.674220 -1.313742 0.307969 0.593400 5.300000
1.606170 -0.710819 -1.238746 0.273809 0.593400 5.300000
1.490017 -0.741441 -1.163741 0.241659 0.593400 5.300000
1.380277 -0.766735 -1.088748 0.211515 0.593400 5.300000
1.277199 -0.787358 -1.013742 0.183378 0.593400 5.300000
1.180987 -0.803903 -0.938748 0.157242 0.593400 5.300000
1.091813 -0.816940 -0.863743 0.133127 0.593400 5.300000
1.009805 -0.827009 -0.788749 0.111006 0.593400 5.300000
0.935068 -0.834573 -0.713744 0.090905 0.593400 5.300000
0.867672 -0.840100 -0.638743 0.072798 0.593400 5.300000
0.807675 -0.843991 -0.563745 0.056706 0.593400 5.300000
0.755117 -0.846609 -0.488747 0.042621 0.593400 5.300000
0.710017 -0.848254 -0.413745 0.030545 0.593400 5.300000
0.672410 -0.849218 -0.338740 0.020472 0.593400 5.300000
0.642284 -0.849712 -0.263746 0.012412 0.593400 5.300000
0.619660 -0.849923 -0.188741 0.006353 0.593400 5.300000
0.604538 -0.849987 -0.113747 0.002307 0.593400 5.300000
