# Supplementary material for: Automatic Parking Controller with a Twin Artificial Neural Network Architecture
Source: Hindawi journal article supplement (doi:10.1155/2019/4801985), 2019-01-01
Supplement: f1 [file 4801985.f1.zip › data/data_126.txt]

7.200000 1.300000 0.000000 0.000000 0.000000 5.300000
7.196319 1.300000 -0.075001 0.000035 -0.016810 5.300000
7.184983 1.300000 -0.150001 0.000261 -0.045084 5.300000
7.166267 1.299987 -0.225002 0.000834 -0.072920 5.300000
7.139987 1.299956 -0.300002 0.001931 -0.100566 5.300000
7.106260 1.299862 -0.375003 0.003711 -0.127246 5.300000
7.064991 1.299655 -0.450003 0.006313 -0.151895 5.300000
7.016263 1.299261 -0.525004 0.009881 -0.176615 5.300000
6.960002 1.298580 -0.600004 0.014571 -0.201329 5.300000
6.896277 1.297465 -0.675004 0.020541 -0.226052 5.300000
6.825037 1.295742 -0.749995 0.027959 -0.250776 5.300000
6.746332 1.293192 -0.824996 0.036980 -0.275385 5.300000
6.660153 1.289548 -0.899997 0.047721 -0.296969 5.300000
6.566542 1.284496 -0.974997 0.060215 -0.316245 5.300000
6.465521 1.277688 -1.049998 0.074530 -0.333429 5.300000
6.357141 1.268729 -1.124998 0.090663 -0.348164 5.300000
6.241478 1.257172 -1.199999 0.108606 -0.360194 5.300000
6.118582 1.242553 -1.274999 0.128294 -0.369322 5.300000
5.988606 1.224389 -1.350000 0.149606 -0.375446 5.300000
5.851654 1.202142 -1.425000 0.172424 -0.378723 5.300000
5.707894 1.175324 -1.500001 0.196580 -0.379250 5.300000
5.557489 1.143380 -1.575002 0.221925 -0.377522 5.300000
5.400693 1.105826 -1.650002 0.248283 -0.374058 5.300000
5.237695 1.062123 -1.725003 0.275551 -0.369429 5.300000
5.068796 1.011798 -1.800003 0.303621 -0.364302 5.300000
4.894265 0.954331 -1.875004 0.332456 -0.359375 5.300000
4.714437 0.889245 -1.950007 0.362096 -0.355409 5.300000
4.530175 0.816224 -2.000000 0.392360 -0.348677 5.300000
4.346429 0.736988 -2.000000 0.421697 -0.332050 5.300000
4.165123 0.652557 -2.000000 0.449775 -0.320076 5.300000
3.986225 0.563154 -2.000000 0.477001 -0.312256 5.300000
3.809806 0.468963 -2.000000 0.503802 -0.308671 5.300000
3.635940 0.370121 -2.000000 0.529753 -0.288732 5.300000
3.464488 0.267151 -2.000000 0.550739 -0.211761 5.300000
3.294817 0.161264 -2.000000 0.563708 -0.110573 5.300000
3.126077 0.053909 -1.999116 0.568267 -0.010574 5.300000
2.959040 -0.052602 -1.948725 0.565398 0.089426 5.300000
2.797312 -0.154134 -1.871860 0.554762 0.189427 5.300000
2.640598 -0.249476 -1.796859 0.536987 0.289428 5.300000
2.488386 -0.337696 -1.721859 0.512338 0.389429 5.300000
2.340362 -0.418047 -1.646858 0.480920 0.489429 5.300000
2.196359 -0.489836 -1.571666 0.442628 0.592953 5.300000
2.056102 -0.552837 -1.500093 0.401526 0.593400 5.300000
1.920394 -0.607357 -1.425088 0.362382 0.593400 5.300000
1.789762 -0.654123 -1.350094 0.325243 0.593400 5.300000
1.664680 -0.693875 -1.275089 0.290112 0.593400 5.300000
1.545524 -0.727306 -1.200093 0.256990 0.593400 5.300000
1.432643 -0.755095 -1.125089 0.225871 0.593400 5.300000
1.326304 -0.777910 -1.050085 0.196764 0.593400 5.300000
1.226743 -0.796358 -0.975090 0.169661 0.593400 5.300000
1.134141 -0.811030 -0.900089 0.144560 0.593400 5.300000
1.048646 -0.822467 -0.825091 0.121475 0.593400 5.300000
0.970372 -0.831187 -0.750086 0.100397 0.593400 5.300000
0.899410 -0.837655 -0.675092 0.081319 0.593400 5.300000
0.835818 -0.842291 -0.600087 0.064252 0.593400 5.300000
0.779655 -0.845484 -0.525092 0.049197 0.593400 5.300000
0.730938 -0.847561 -0.450088 0.036144 0.593400 5.300000
0.689695 -0.848820 -0.375094 0.025103 0.593400 5.300000
0.655946 -0.849519 -0.300089 0.016067 0.593400 5.300000
0.629696 -0.849852 -0.225090 0.009039 0.593400 5.300000
0.610935 -0.849966 -0.150089 0.004020 0.593400 5.300000
0.599675 -0.850000 -0.075094 0.001005 0.593400 5.300000
