# Supplementary material for: Automatic Parking Controller with a Twin Artificial Neural Network Architecture
Source: Hindawi journal article supplement (doi:10.1155/2019/4801985), 2019-01-01
Supplement: f1 [file 4801985.f1.zip › data/data_127.txt]

7.300000 1.300000 0.000000 0.000000 0.000000 5.300000
7.296319 1.300000 -0.074999 0.000030 -0.014595 5.300000
7.284975 1.300000 -0.149998 0.000243 -0.039638 5.300000
7.266269 1.299987 -0.225002 0.000767 -0.064376 5.300000
7.239991 1.299959 -0.299997 0.001768 -0.089098 5.300000
7.206259 1.299872 -0.374999 0.003386 -0.113818 5.300000
7.164990 1.299685 -0.450003 0.005771 -0.138526 5.300000
7.116263 1.299324 -0.524996 0.009077 -0.163207 5.300000
7.060007 1.298696 -0.600000 0.013456 -0.187554 5.300000
6.996267 1.297667 -0.675004 0.019037 -0.210551 5.300000
6.925036 1.296065 -0.749997 0.025944 -0.232445 5.300000
6.846312 1.293700 -0.825002 0.034279 -0.253169 5.300000
6.760138 1.290326 -0.900002 0.044142 -0.272513 5.300000
6.666497 1.285658 -0.974999 0.055612 -0.290255 5.300000
6.565452 1.279378 -1.050001 0.068721 -0.306161 5.300000
6.457008 1.271113 -1.124997 0.083513 -0.320044 5.300000
6.341258 1.260474 -1.200001 0.099976 -0.331726 5.300000
6.218235 1.247017 -1.274999 0.118074 -0.341107 5.300000
6.088063 1.230289 -1.349998 0.137731 -0.348152 5.300000
5.950834 1.209792 -1.425003 0.158877 -0.352965 5.300000
5.806698 1.185026 -1.499997 0.181405 -0.355751 5.300000
5.655815 1.155503 -1.575000 0.205212 -0.356773 5.300000
5.498374 1.120668 -1.650004 0.230190 -0.356594 5.300000
5.334597 1.080037 -1.724997 0.256287 -0.355642 5.300000
5.164727 1.033045 -1.800001 0.283454 -0.354506 5.300000
4.989069 0.979184 -1.875004 0.311700 -0.353924 5.300000
4.807892 0.917852 -1.953555 0.341144 -0.355057 5.300000
4.622031 0.848659 -1.990290 0.371628 -0.352567 5.300000
4.436875 0.773269 -2.000000 0.401584 -0.341075 5.300000
4.253946 0.692409 -2.000000 0.430723 -0.333608 5.300000
4.073438 0.606307 -2.000000 0.459433 -0.330578 5.300000
3.895473 0.515065 -2.000000 0.488063 -0.331350 5.300000
3.720199 0.418763 -2.000000 0.516810 -0.332011 5.300000
3.547621 0.317682 -2.000000 0.541516 -0.255601 5.300000
3.377183 0.213047 -2.000000 0.558364 -0.159192 5.300000
3.208090 0.106223 -2.000000 0.567252 -0.059192 5.300000
3.039624 -0.001307 -1.983744 0.567850 0.040809 5.300000
2.875273 -0.105488 -1.908319 0.560850 0.140809 5.300000
2.716206 -0.203959 -1.833325 0.546478 0.240809 5.300000
2.561860 -0.295731 -1.758322 0.525185 0.340809 5.300000
2.411827 -0.380019 -1.683318 0.497024 0.440810 5.300000
2.265881 -0.456017 -1.608160 0.462100 0.543843 5.300000
2.123767 -0.523317 -1.536809 0.421293 0.593400 5.300000
1.985775 -0.581862 -1.461550 0.381165 0.593400 5.300000
1.852615 -0.632306 -1.386556 0.343048 0.593400 5.300000
1.724774 -0.675379 -1.311551 0.306943 0.593400 5.300000
1.602690 -0.711794 -1.236557 0.272841 0.593400 5.300000
1.486720 -0.742253 -1.161552 0.240751 0.593400 5.300000
1.377172 -0.767401 -1.086558 0.210665 0.593400 5.300000
1.274291 -0.787897 -1.011553 0.182587 0.593400 5.300000
1.178282 -0.804331 -0.936558 0.156510 0.593400 5.300000
1.089317 -0.817273 -0.861553 0.132453 0.593400 5.300000
1.007520 -0.827263 -0.786559 0.110390 0.593400 5.300000
0.932996 -0.834762 -0.711554 0.090349 0.593400 5.300000
0.865816 -0.840235 -0.636552 0.072300 0.593400 5.300000
0.806035 -0.844085 -0.561555 0.056266 0.593400 5.300000
0.753694 -0.846670 -0.486556 0.042240 0.593400 5.300000
0.708813 -0.848291 -0.411556 0.030222 0.593400 5.300000
0.671425 -0.849238 -0.336550 0.020209 0.593400 5.300000
0.641519 -0.849722 -0.261556 0.012207 0.593400 5.300000
0.619113 -0.849926 -0.186552 0.006207 0.593400 5.300000
0.604208 -0.849988 -0.111557 0.002219 0.593400 5.300000
