# Supplementary material for: Automatic Parking Controller with a Twin Artificial Neural Network Architecture
Source: Hindawi journal article supplement (doi:10.1155/2019/4801985), 2019-01-01
Supplement: f1 [file 4801985.f1.zip › data/data_128.txt]

6.500000 1.400000 0.000000 0.000000 0.000000 5.300000
6.496275 1.400000 -0.074998 0.000054 -0.043104 5.300000
6.485027 1.399999 -0.149996 0.000420 -0.092347 5.300000
6.466236 1.399983 -0.225003 0.001396 -0.142149 5.300000
6.440013 1.399921 -0.300000 0.003282 -0.192981 5.300000
6.406240 1.399762 -0.374998 0.006432 -0.245361 5.300000
6.365003 1.399395 -0.449995 0.011195 -0.300101 5.300000
6.316263 1.398690 -0.525004 0.018016 -0.358698 5.300000
6.260019 1.397421 -0.600001 0.027443 -0.424051 5.300000
6.196311 1.395279 -0.674999 0.040281 -0.504815 5.300000
6.125136 1.391813 -0.749996 0.057286 -0.543182 5.300000
6.046575 1.386522 -0.825005 0.077415 -0.568702 5.300000
5.960666 1.378872 -0.900001 0.100262 -0.575500 5.300000
5.867513 1.368332 -0.974999 0.125155 -0.575472 5.300000
5.767236 1.354346 -1.049997 0.152030 -0.575274 5.300000
5.659990 1.336327 -1.125002 0.180896 -0.575182 5.300000
5.545984 1.313656 -1.200002 0.211757 -0.575574 5.300000
5.425442 1.285661 -1.275000 0.244613 -0.576140 5.300000
5.298678 1.251670 -1.349997 0.279452 -0.575615 5.300000
5.166047 1.210954 -1.424995 0.316265 -0.573800 5.300000
5.027964 1.162778 -1.500003 0.355087 -0.573690 5.300000
4.884937 1.106403 -1.575000 0.395849 -0.575827 5.300000
4.737447 1.041226 -1.649998 0.435053 -0.505107 5.300000
4.585720 0.967423 -1.724999 0.469314 -0.426709 5.300000
4.429765 0.885313 -1.800003 0.498764 -0.357029 5.300000
4.269572 0.795304 -1.875001 0.524178 -0.296928 5.300000
4.105074 0.697735 -1.950893 0.545715 -0.238987 5.300000
3.936542 0.593254 -1.995891 0.563188 -0.179349 5.300000
3.768141 0.485348 -2.000000 0.575745 -0.118113 5.300000
3.600862 0.375716 -2.000000 0.583591 -0.060812 5.300000
3.434189 0.265171 -2.000000 0.586884 -0.009940 5.300000
3.267633 0.154462 -2.000000 0.585453 0.039604 5.300000
3.100542 0.044326 -1.993845 0.579274 0.095766 5.300000
2.934842 -0.062918 -1.939552 0.568856 0.147485 5.300000
2.773985 -0.164274 -1.863731 0.554822 0.207055 5.300000
2.617910 -0.259089 -1.788734 0.535877 0.305279 5.300000
2.466256 -0.346655 -1.713725 0.510087 0.405276 5.300000
2.318722 -0.426212 -1.638728 0.477520 0.505277 5.300000
2.175109 -0.497107 -1.564747 0.438208 0.593400 5.300000
2.035317 -0.559125 -1.491985 0.397201 0.593400 5.300000
1.900133 -0.612766 -1.416989 0.358272 0.593400 5.300000
1.770076 -0.658747 -1.341984 0.321354 0.593400 5.300000
1.645616 -0.697780 -1.266988 0.286438 0.593400 5.300000
1.527126 -0.730569 -1.191985 0.253533 0.593400 5.300000
1.414937 -0.757797 -1.116985 0.222628 0.593400 5.300000
1.309325 -0.780103 -1.041986 0.193736 0.593400 5.300000
1.210512 -0.798119 -0.966983 0.166853 0.593400 5.300000
1.118665 -0.812412 -0.891987 0.141974 0.593400 5.300000
1.033942 -0.823533 -0.816982 0.119097 0.593400 5.300000
0.956457 -0.831991 -0.741985 0.098240 0.593400 5.300000
0.886295 -0.838235 -0.666982 0.079377 0.593400 5.300000
0.823502 -0.842696 -0.591983 0.062536 0.593400 5.300000
0.768139 -0.845749 -0.516984 0.047695 0.593400 5.300000
0.720235 -0.847734 -0.441980 0.034854 0.593400 5.300000
0.679795 -0.848918 -0.366984 0.024035 0.593400 5.300000
0.646856 -0.849572 -0.291979 0.015208 0.593400 5.300000
0.621410 -0.849864 -0.216983 0.008402 0.593400 5.300000
0.603460 -0.849973 -0.141980 0.003598 0.593400 5.300000
