# Supplementary material for: Automatic Parking Controller with a Twin Artificial Neural Network Architecture
Source: Hindawi journal article supplement (doi:10.1155/2019/4801985), 2019-01-01
Supplement: f1 [file 4801985.f1.zip › data/data_129.txt]

6.600000 1.400000 0.000000 0.000000 0.000000 5.300000
6.596282 1.400000 -0.075000 0.000052 -0.037846 5.300000
6.585022 1.400000 -0.149999 0.000383 -0.082732 5.300000
6.566237 1.399984 -0.225000 0.001281 -0.127827 5.300000
6.540014 1.399925 -0.299999 0.003004 -0.173430 5.300000
6.506243 1.399775 -0.375002 0.005851 -0.219743 5.300000
6.465006 1.399456 -0.450000 0.010128 -0.267064 5.300000
6.416252 1.398814 -0.525000 0.016187 -0.315845 5.300000
6.360014 1.397685 -0.600000 0.024403 -0.366876 5.300000
6.296295 1.395793 -0.674999 0.035233 -0.421740 5.300000
6.225111 1.392794 -0.750000 0.049309 -0.488046 5.300000
6.146500 1.388220 -0.824999 0.067386 -0.531507 5.300000
6.060506 1.381488 -0.900002 0.088873 -0.555744 5.300000
5.967240 1.372043 -0.974999 0.113438 -0.575262 5.300000
5.866797 1.359220 -1.050001 0.140322 -0.574893 5.300000
5.759357 1.342470 -1.125000 0.169193 -0.575172 5.300000
5.645089 1.321126 -1.199999 0.200060 -0.575942 5.300000
5.524224 1.294550 -1.275004 0.232905 -0.575723 5.300000
5.397082 1.262049 -1.349999 0.267720 -0.573771 5.300000
5.263972 1.222875 -1.425002 0.304541 -0.573073 5.300000
5.125349 1.176338 -1.499999 0.343415 -0.577143 5.300000
4.981624 1.121715 -1.575001 0.381829 -0.519178 5.300000
4.833081 1.059010 -1.649999 0.416183 -0.451870 5.300000
4.679849 0.988339 -1.724999 0.447162 -0.396955 5.300000
4.522040 0.909857 -1.800004 0.475166 -0.346162 5.300000
4.359750 0.823698 -1.874999 0.500249 -0.297301 5.300000
4.192984 0.730050 -1.951092 0.522335 -0.249345 5.300000
4.022152 0.629474 -2.000000 0.541082 -0.199106 5.300000
3.851474 0.525114 -2.000000 0.555670 -0.145781 5.300000
3.682150 0.418668 -2.000000 0.566111 -0.096706 5.300000
3.513743 0.310783 -2.000000 0.572745 -0.050166 5.300000
3.345859 0.202087 -2.000000 0.575714 -0.009108 5.300000
3.178089 0.093213 -1.999948 0.574738 0.027331 5.300000
3.010445 -0.014850 -1.972184 0.569832 0.070204 5.300000
2.847013 -0.118676 -1.898061 0.561108 0.159507 5.300000
2.688776 -0.216550 -1.823059 0.545375 0.259510 5.300000
2.535148 -0.307525 -1.748053 0.522744 0.359514 5.300000
2.385752 -0.390844 -1.673060 0.493269 0.459507 5.300000
2.240404 -0.465708 -1.597651 0.456925 0.566984 5.300000
2.098763 -0.531815 -1.526337 0.415694 0.593400 5.300000
1.961405 -0.589214 -1.451313 0.375843 0.593400 5.300000
1.828940 -0.638607 -1.376315 0.338004 0.593400 5.300000
1.701867 -0.680727 -1.301314 0.302165 0.593400 5.300000
1.580593 -0.716292 -1.226312 0.268338 0.593400 5.300000
1.465486 -0.745981 -1.151315 0.236521 0.593400 5.300000
1.356838 -0.770462 -1.076310 0.206709 0.593400 5.300000
1.254876 -0.790363 -1.001315 0.178908 0.593400 5.300000
1.159823 -0.806290 -0.926310 0.153108 0.593400 5.300000
1.071829 -0.818803 -0.851312 0.129320 0.593400 5.300000
0.991022 -0.828421 -0.776312 0.107533 0.593400 5.300000
0.917497 -0.835622 -0.701309 0.087765 0.593400 5.300000
0.851319 -0.840848 -0.626313 0.069993 0.593400 5.300000
0.792555 -0.844510 -0.551308 0.054230 0.593400 5.300000
0.741228 -0.846940 -0.476312 0.040480 0.593400 5.300000
0.697377 -0.848461 -0.401308 0.028740 0.593400 5.300000
0.661000 -0.849323 -0.326310 0.019001 0.593400 5.300000
0.632124 -0.849762 -0.251309 0.011270 0.593400 5.300000
0.610751 -0.849940 -0.176307 0.005546 0.593400 5.300000
0.596869 -0.849992 -0.101310 0.001833 0.593400 5.300000
