# Supplementary material for: Automatic Parking Controller with a Twin Artificial Neural Network Architecture
Source: Hindawi journal article supplement (doi:10.1155/2019/4801985), 2019-01-01
Supplement: f1 [file 4801985.f1.zip › data/data_130.txt]

6.700000 1.400000 0.000000 0.000000 0.000000 5.300000
6.696286 1.400000 -0.075000 0.000046 -0.034076 5.300000
6.685014 1.400000 -0.149999 0.000360 -0.075911 5.300000
6.666245 1.399984 -0.225002 0.001199 -0.117753 5.300000
6.640016 1.399930 -0.299997 0.002800 -0.159843 5.300000
6.606241 1.399795 -0.375000 0.005447 -0.202252 5.300000
6.565010 1.399489 -0.450005 0.009398 -0.245073 5.300000
6.516251 1.398901 -0.524997 0.014963 -0.288436 5.300000
6.460020 1.397858 -0.600003 0.022453 -0.332552 5.300000
6.396284 1.396118 -0.674996 0.032203 -0.377725 5.300000
6.325096 1.393399 -0.750000 0.044605 -0.424532 5.300000
6.246454 1.389292 -0.825004 0.060130 -0.474975 5.300000
6.160408 1.383293 -0.899997 0.079233 -0.510698 5.300000
6.067042 1.374851 -0.975002 0.101535 -0.534972 5.300000
5.966448 1.363316 -1.050003 0.126978 -0.560197 5.300000
5.858793 1.348023 -1.125000 0.155570 -0.575567 5.300000
5.744237 1.328234 -1.200002 0.186441 -0.575928 5.300000
5.623031 1.303314 -1.275001 0.219257 -0.574037 5.300000
5.495439 1.272532 -1.350002 0.254069 -0.572285 5.300000
5.361827 1.235198 -1.425000 0.290965 -0.576256 5.300000
5.222540 1.190616 -1.500000 0.327824 -0.529115 5.300000
5.077878 1.138570 -1.574999 0.362145 -0.477360 5.300000
4.928047 1.078988 -1.649998 0.394199 -0.431546 5.300000
4.773255 1.011802 -1.725003 0.424117 -0.388296 5.300000
4.613667 0.937009 -1.799997 0.451867 -0.346394 5.300000
4.449425 0.854617 -1.875000 0.477363 -0.305189 5.300000
4.280601 0.764748 -1.951117 0.500449 -0.264296 5.300000
4.107653 0.667767 -1.996023 0.520831 -0.220637 5.300000
3.935019 0.566749 -2.000000 0.537508 -0.173691 5.300000
3.763935 0.463173 -2.000000 0.550526 -0.130756 5.300000
3.594021 0.357674 -2.000000 0.560198 -0.090684 5.300000
3.424968 0.250801 -2.000000 0.566764 -0.052544 5.300000
3.256457 0.143074 -2.000000 0.570434 -0.015937 5.300000
3.088188 0.035011 -1.999119 0.570843 0.012121 5.300000
2.922179 -0.071182 -1.933454 0.565927 0.113094 5.300000
2.761622 -0.171904 -1.857869 0.553569 0.213091 5.300000
2.605912 -0.266204 -1.782876 0.534093 0.313088 5.300000
2.454589 -0.353160 -1.707871 0.507803 0.413087 5.300000
2.307364 -0.432067 -1.632870 0.474686 0.513092 5.300000
2.164037 -0.502268 -1.559766 0.434920 0.593400 5.300000
2.024587 -0.563608 -1.486129 0.394088 0.593400 5.300000
1.889786 -0.616622 -1.411131 0.355316 0.593400 5.300000
1.760151 -0.662034 -1.336127 0.318554 0.593400 5.300000
1.636143 -0.700557 -1.261131 0.283795 0.593400 5.300000
1.518132 -0.732887 -1.186126 0.251047 0.593400 5.300000
1.406448 -0.759709 -1.111129 0.220300 0.593400 5.300000
1.301361 -0.781659 -1.036127 0.191565 0.593400 5.300000
1.203086 -0.799362 -0.961126 0.164837 0.593400 5.300000
1.111791 -0.813388 -0.886128 0.140115 0.593400 5.300000
1.027630 -0.824283 -0.811124 0.117395 0.593400 5.300000
0.950712 -0.832553 -0.736128 0.096696 0.593400 5.300000
0.881124 -0.838644 -0.661124 0.077989 0.593400 5.300000
0.818907 -0.842981 -0.586127 0.061304 0.593400 5.300000
0.764126 -0.845939 -0.511125 0.046620 0.593400 5.300000
0.716807 -0.847853 -0.436124 0.033936 0.593400 5.300000
0.676954 -0.848986 -0.361126 0.023273 0.593400 5.300000
0.644603 -0.849606 -0.286122 0.014604 0.593400 5.300000
0.619741 -0.849878 -0.211126 0.007955 0.593400 5.300000
0.602372 -0.849977 -0.136121 0.003308 0.593400 5.300000
