# Supplementary material for: Automatic Parking Controller with a Twin Artificial Neural Network Architecture
Source: Hindawi journal article supplement (doi:10.1155/2019/4801985), 2019-01-01
Supplement: f1 [file 4801985.f1.zip › data/data_131.txt]

6.800000 1.400000 0.000000 0.000000 0.000000 5.300000
6.796288 1.400000 -0.074999 0.000044 -0.031231 5.300000
6.785012 1.400000 -0.149998 0.000347 -0.070837 5.300000
6.766248 1.399985 -0.224998 0.001137 -0.110316 5.300000
6.740008 1.399934 -0.299997 0.002659 -0.149904 5.300000
6.706247 1.399806 -0.374996 0.005150 -0.189609 5.300000
6.665011 1.399518 -0.449997 0.008882 -0.229443 5.300000
6.616249 1.398965 -0.525005 0.014103 -0.269403 5.300000
6.560017 1.397983 -0.600004 0.021086 -0.309504 5.300000
6.496280 1.396354 -0.675003 0.030144 -0.349746 5.300000
6.425087 1.393806 -0.750002 0.041566 -0.390102 5.300000
6.346421 1.389987 -0.825002 0.055686 -0.431029 5.300000
6.260354 1.384465 -0.900001 0.072806 -0.464961 5.300000
6.166921 1.376719 -0.975000 0.092862 -0.489255 5.300000
6.066226 1.366192 -1.049999 0.115800 -0.513975 5.300000
5.958369 1.352229 -1.124999 0.141887 -0.538695 5.300000
5.843552 1.334123 -1.199998 0.171356 -0.564291 5.300000
5.721972 1.311036 -1.274997 0.204129 -0.577884 5.300000
5.593942 1.282210 -1.350001 0.238666 -0.565152 5.300000
5.459725 1.247047 -1.425005 0.273379 -0.534343 5.300000
5.319607 1.205152 -1.500005 0.307164 -0.497720 5.300000
5.173854 1.156252 -1.575004 0.339748 -0.461124 5.300000
5.022699 1.100102 -1.650003 0.370979 -0.424796 5.300000
4.866382 1.036566 -1.725002 0.400713 -0.388749 5.300000
4.705094 0.965491 -1.800002 0.428817 -0.352979 5.300000
4.539030 0.886869 -1.875001 0.455139 -0.317425 5.300000
4.368303 0.800645 -1.951058 0.479535 -0.282203 5.300000
4.193477 0.707203 -2.000000 0.501684 -0.244151 5.300000
4.019021 0.609283 -2.000000 0.520541 -0.201381 5.300000
3.846310 0.508425 -2.000000 0.536058 -0.163103 5.300000
3.675037 0.405151 -2.000000 0.548607 -0.128028 5.300000
3.504929 0.299979 -2.000000 0.558416 -0.095246 5.300000
3.335723 0.193349 -2.000000 0.565693 -0.064034 5.300000
3.167132 0.085684 -2.000000 0.570288 -0.027076 5.300000
2.999359 -0.021959 -1.967663 0.569134 0.066132 5.300000
2.836335 -0.125383 -1.893067 0.560269 0.166161 5.300000
2.678423 -0.222818 -1.818068 0.544094 0.266160 5.300000
2.525083 -0.313316 -1.743068 0.520986 0.366159 5.300000
2.375962 -0.396077 -1.668069 0.491077 0.466158 5.300000
2.230883 -0.470370 -1.592567 0.454241 0.575447 5.300000
2.089488 -0.535894 -1.521330 0.412981 0.593400 5.300000
1.952439 -0.592739 -1.446324 0.373265 0.593400 5.300000
1.820316 -0.641628 -1.371328 0.335559 0.593400 5.300000
1.693616 -0.683289 -1.296325 0.299855 0.593400 5.300000
1.572744 -0.718442 -1.221326 0.266161 0.593400 5.300000
1.458057 -0.747765 -1.146327 0.234476 0.593400 5.300000
1.349847 -0.771920 -1.071323 0.204797 0.593400 5.300000
1.248340 -0.791539 -0.996327 0.177130 0.593400 5.300000
1.153749 -0.807221 -0.921322 0.151464 0.593400 5.300000
1.066231 -0.819528 -0.846326 0.127810 0.593400 5.300000
0.985906 -0.828970 -0.771323 0.106156 0.593400 5.300000
0.912868 -0.836025 -0.696323 0.086520 0.593400 5.300000
0.847182 -0.841136 -0.621324 0.068884 0.593400 5.300000
0.788912 -0.844705 -0.546321 0.053254 0.593400 5.300000
0.738082 -0.847066 -0.471325 0.039637 0.593400 5.300000
0.694727 -0.848536 -0.396319 0.028031 0.593400 5.300000
0.658845 -0.849363 -0.321323 0.018427 0.593400 5.300000
0.630467 -0.849779 -0.246320 0.010826 0.593400 5.300000
0.609592 -0.849946 -0.171321 0.005235 0.593400 5.300000
0.596210 -0.849994 -0.096322 0.001657 0.593400 5.300000
