# Supplementary material for: Automatic Parking Controller with a Twin Artificial Neural Network Architecture
Source: Hindawi journal article supplement (doi:10.1155/2019/4801985), 2019-01-01
Supplement: f1 [file 4801985.f1.zip › data/data_132.txt]

6.900000 1.400000 0.000000 0.000000 0.000000 5.300000
6.896296 1.400000 -0.074998 0.000042 -0.028980 5.300000
6.885005 1.400000 -0.149995 0.000336 -0.066830 5.300000
6.866250 1.399986 -0.225003 0.001093 -0.104499 5.300000
6.840003 1.399938 -0.300000 0.002547 -0.142190 5.300000
6.806250 1.399812 -0.374998 0.004929 -0.179882 5.300000
6.765011 1.399536 -0.449996 0.008479 -0.217538 5.300000
6.716252 1.399011 -0.525003 0.013445 -0.255131 5.300000
6.660018 1.398070 -0.600000 0.020071 -0.292572 5.300000
6.596279 1.396521 -0.674998 0.028629 -0.329767 5.300000
6.525077 1.394116 -0.749996 0.039363 -0.366556 5.300000
6.446409 1.390505 -0.825003 0.052572 -0.400363 5.300000
6.360314 1.385308 -0.900001 0.068286 -0.425629 5.300000
6.266844 1.378061 -0.974998 0.086512 -0.450347 5.300000
6.166075 1.368282 -1.049996 0.107439 -0.475063 5.300000
6.058090 1.355345 -1.125000 0.131290 -0.499782 5.300000
5.943067 1.338591 -1.200001 0.158293 -0.524734 5.300000
5.821168 1.317253 -1.274998 0.188396 -0.537194 5.300000
5.692656 1.290635 -1.349996 0.220130 -0.527934 5.300000
5.557770 1.258119 -1.425001 0.252483 -0.507960 5.300000
5.416787 1.219294 -1.500001 0.284759 -0.482351 5.300000
5.269936 1.173726 -1.574998 0.316536 -0.453695 5.300000
5.117523 1.121145 -1.649996 0.347486 -0.423556 5.300000
4.959744 1.061276 -1.725001 0.377387 -0.392721 5.300000
4.796869 0.993957 -1.800001 0.406052 -0.361647 5.300000
4.629091 0.919041 -1.874999 0.433321 -0.330581 5.300000
4.456575 0.836476 -1.951673 0.459064 -0.299774 5.300000
4.279899 0.746438 -1.993944 0.482970 -0.265669 5.300000
4.103786 0.651664 -2.000000 0.503857 -0.226916 5.300000
3.929536 0.553496 -2.000000 0.521692 -0.192391 5.300000
3.756922 0.452488 -2.000000 0.536836 -0.161292 5.300000
3.585733 0.349066 -2.000000 0.549570 -0.132802 5.300000
3.415753 0.243684 -2.000000 0.560103 -0.106753 5.300000
3.246789 0.136684 -2.000000 0.568396 -0.072055 5.300000
3.078444 0.028756 -1.995189 0.570666 0.018563 5.300000
2.912757 -0.077164 -1.928812 0.565366 0.118874 5.300000
2.752498 -0.177545 -1.853538 0.552640 0.218872 5.300000
2.597049 -0.271443 -1.778541 0.532757 0.318869 5.300000
2.445975 -0.357952 -1.703532 0.506075 0.418869 5.300000
2.298983 -0.436366 -1.628536 0.472566 0.518873 5.300000
2.155859 -0.506049 -1.556050 0.432485 0.593400 5.300000
2.016664 -0.566892 -1.481795 0.391792 0.593400 5.300000
1.882148 -0.619446 -1.406795 0.353136 0.593400 5.300000
1.752827 -0.664440 -1.331792 0.316489 0.593400 5.300000
1.629156 -0.702587 -1.256796 0.281847 0.593400 5.300000
1.511502 -0.734580 -1.181791 0.249215 0.593400 5.300000
1.400192 -0.761104 -1.106795 0.218585 0.593400 5.300000
1.295493 -0.782793 -1.031791 0.189966 0.593400 5.300000
1.197618 -0.800268 -0.956793 0.163352 0.593400 5.300000
1.106730 -0.814097 -0.881792 0.138747 0.593400 5.300000
1.022985 -0.824828 -0.806790 0.116143 0.593400 5.300000
0.946490 -0.832960 -0.731793 0.095561 0.593400 5.300000
0.877327 -0.838939 -0.656788 0.076969 0.593400 5.300000
0.815537 -0.843186 -0.581792 0.060400 0.593400 5.300000
0.761186 -0.846075 -0.506788 0.045832 0.593400 5.300000
0.714299 -0.847937 -0.431790 0.033265 0.593400 5.300000
0.674880 -0.849034 -0.356790 0.022716 0.593400 5.300000
0.642962 -0.849630 -0.281787 0.014166 0.593400 5.300000
0.618537 -0.849887 -0.206791 0.007633 0.593400 5.300000
0.601601 -0.849980 -0.131786 0.003102 0.593400 5.300000
