# Supplementary material for: Automatic Parking Controller with a Twin Artificial Neural Network Architecture
Source: Hindawi journal article supplement (doi:10.1155/2019/4801985), 2019-01-01
Supplement: f1 [file 4801985.f1.zip › data/data_133.txt]

7.000000 1.400000 0.000000 0.000000 0.000000 5.300000
6.996302 1.400000 -0.075002 0.000040 -0.026608 5.300000
6.984991 1.400000 -0.150004 0.000325 -0.062645 5.300000
6.966257 1.399986 -0.225001 0.001040 -0.098406 5.300000
6.939998 1.399942 -0.299999 0.002431 -0.134134 5.300000
6.906255 1.399823 -0.375001 0.004695 -0.169756 5.300000
6.864997 1.399562 -0.450003 0.008068 -0.205213 5.300000
6.816259 1.399058 -0.524999 0.012765 -0.240435 5.300000
6.760005 1.398170 -0.599997 0.019026 -0.275296 5.300000
6.696279 1.396702 -0.675000 0.027075 -0.309641 5.300000
6.625064 1.394424 -0.750001 0.037155 -0.343091 5.300000
6.546394 1.391028 -0.824997 0.049388 -0.368230 5.300000
6.460276 1.386152 -0.900005 0.063790 -0.392937 5.300000
6.366772 1.379406 -0.975002 0.080535 -0.417656 5.300000
6.265930 1.370303 -1.050000 0.099833 -0.442375 5.300000
6.157852 1.358289 -1.125003 0.121884 -0.467242 5.300000
6.042649 1.342729 -1.200004 0.146856 -0.489890 5.300000
5.920496 1.322953 -1.275000 0.174250 -0.495177 5.300000
5.791581 1.298322 -1.349999 0.203315 -0.492122 5.300000
5.656134 1.268261 -1.425002 0.233436 -0.480770 5.300000
5.514386 1.232234 -1.500002 0.264061 -0.463279 5.300000
5.366622 1.189822 -1.574998 0.294711 -0.441810 5.300000
5.213055 1.140618 -1.649997 0.325036 -0.417806 5.300000
5.053981 1.084346 -1.725000 0.354744 -0.392394 5.300000
4.889614 1.020702 -1.800000 0.383635 -0.366257 5.300000
4.720229 0.949539 -1.875005 0.411537 -0.339890 5.300000
4.545991 0.870648 -1.950821 0.438323 -0.313832 5.300000
4.367624 0.784227 -2.000000 0.463655 -0.284581 5.300000
4.189721 0.692669 -2.000000 0.486335 -0.249038 5.300000
4.013878 0.597403 -2.000000 0.506217 -0.218196 5.300000
3.839840 0.498866 -2.000000 0.523704 -0.190962 5.300000
3.667432 0.397495 -2.000000 0.539063 -0.166543 5.300000
3.496509 0.293643 -2.000000 0.552545 -0.144269 5.300000
3.326906 0.187655 -2.000000 0.564228 -0.121125 5.300000
3.158300 0.080022 -2.000000 0.570605 -0.029116 5.300000
2.990732 -0.027465 -1.966360 0.569013 0.071378 5.300000
2.827972 -0.130633 -1.889154 0.559569 0.171381 5.300000
2.670307 -0.227709 -1.814158 0.543077 0.271379 5.300000
2.517198 -0.317845 -1.739158 0.519582 0.371382 5.300000
2.368285 -0.400166 -1.664155 0.489334 0.471378 5.300000
2.223417 -0.474004 -1.588617 0.452122 0.581310 5.300000
2.082220 -0.539069 -1.517414 0.410858 0.593400 5.300000
1.945416 -0.595480 -1.442409 0.371247 0.593400 5.300000
1.813564 -0.643976 -1.367414 0.333647 0.593400 5.300000
1.687157 -0.685280 -1.292409 0.298047 0.593400 5.300000
1.566602 -0.720111 -1.217412 0.264459 0.593400 5.300000
1.452246 -0.749149 -1.142410 0.232877 0.593400 5.300000
1.344380 -0.773051 -1.067409 0.203303 0.593400 5.300000
1.243231 -0.792451 -0.992412 0.175741 0.593400 5.300000
1.149005 -0.807942 -0.917407 0.150180 0.593400 5.300000
1.061859 -0.820087 -0.842411 0.126630 0.593400 5.300000
0.981914 -0.829393 -0.767407 0.105081 0.593400 5.300000
0.909257 -0.836336 -0.692409 0.085548 0.593400 5.300000
0.843956 -0.841358 -0.617408 0.068020 0.593400 5.300000
0.786074 -0.844855 -0.542406 0.052495 0.593400 5.300000
0.735635 -0.847163 -0.467409 0.038980 0.593400 5.300000
0.692670 -0.848592 -0.392404 0.027481 0.593400 5.300000
0.657179 -0.849393 -0.317409 0.017981 0.593400 5.300000
0.629190 -0.849792 -0.242404 0.010484 0.593400 5.300000
0.608705 -0.849950 -0.167407 0.004998 0.593400 5.300000
0.595712 -0.849996 -0.092406 0.001525 0.593400 5.300000
