# Supplementary material for: Automatic Parking Controller with a Twin Artificial Neural Network Architecture
Source: Hindawi journal article supplement (doi:10.1155/2019/4801985), 2019-01-01
Supplement: f1 [file 4801985.f1.zip › data/data_134.txt]

7.100000 1.400000 0.000000 0.000000 0.000000 5.300000
7.096309 1.400000 -0.074996 0.000039 -0.024094 5.300000
7.084986 1.400000 -0.150003 0.000305 -0.058217 5.300000
7.066268 1.399986 -0.225001 0.000992 -0.091991 5.300000
7.039991 1.399945 -0.299997 0.002302 -0.125657 5.300000
7.006259 1.399833 -0.374998 0.004450 -0.159143 5.300000
6.964992 1.399587 -0.450001 0.007631 -0.192354 5.300000
6.916259 1.399112 -0.524998 0.012057 -0.225197 5.300000
6.860007 1.398266 -0.599994 0.017944 -0.257475 5.300000
6.796279 1.396891 -0.675003 0.025485 -0.288771 5.300000
6.725053 1.394750 -0.749999 0.034842 -0.314435 5.300000
6.646378 1.391566 -0.824997 0.046054 -0.339120 5.300000
6.560241 1.387032 -0.900003 0.059313 -0.363835 5.300000
6.466713 1.380767 -0.974999 0.074774 -0.388558 5.300000
6.365806 1.372310 -1.049995 0.092664 -0.413272 5.300000
6.257641 1.361158 -1.125003 0.113158 -0.437577 5.300000
6.142284 1.346713 -1.200000 0.136118 -0.451694 5.300000
6.019904 1.328405 -1.274997 0.161132 -0.458367 5.300000
5.890651 1.305614 -1.349999 0.187862 -0.458653 5.300000
5.754723 1.277795 -1.425000 0.215870 -0.452756 5.300000
5.612345 1.244402 -1.499997 0.244726 -0.441550 5.300000
5.463747 1.204947 -1.574994 0.274032 -0.426295 5.300000
5.309180 1.159027 -1.650002 0.303432 -0.408231 5.300000
5.148902 1.106234 -1.724998 0.332659 -0.388322 5.300000
4.983187 1.046265 -1.799994 0.361488 -0.367423 5.300000
4.812260 0.978827 -1.875001 0.389757 -0.346107 5.300000
4.636366 0.903696 -1.952911 0.417338 -0.325111 5.300000
4.456165 0.820857 -1.989067 0.443957 -0.300111 5.300000
4.276684 0.732770 -2.000000 0.468217 -0.269157 5.300000
4.099218 0.640528 -2.000000 0.490018 -0.242313 5.300000
3.923706 0.544635 -2.000000 0.509743 -0.219159 5.300000
3.750037 0.445458 -2.000000 0.527663 -0.198982 5.300000
3.578081 0.343326 -2.000000 0.544059 -0.181547 5.300000
3.407748 0.238507 -2.000000 0.558741 -0.152637 5.300000
3.238745 0.131568 -2.000000 0.568520 -0.077179 5.300000
3.070350 0.023549 -1.990985 0.570413 0.023630 5.300000
2.905003 -0.082063 -1.924962 0.564981 0.123627 5.300000
2.744990 -0.182175 -1.849966 0.551835 0.223627 5.300000
2.589761 -0.275722 -1.774969 0.531648 0.323628 5.300000
2.438883 -0.361873 -1.699967 0.504623 0.423629 5.300000
2.292079 -0.439884 -1.624965 0.470801 0.523629 5.300000
2.149136 -0.509139 -1.552910 0.430486 0.593400 5.300000
2.010152 -0.569576 -1.478226 0.389907 0.593400 5.300000
1.875872 -0.621754 -1.403224 0.351346 0.593400 5.300000
1.746811 -0.666405 -1.328223 0.314793 0.593400 5.300000
1.623416 -0.704244 -1.253225 0.280247 0.593400 5.300000
1.506059 -0.735961 -1.178221 0.247712 0.593400 5.300000
1.395057 -0.762240 -1.103225 0.217177 0.593400 5.300000
1.290678 -0.783716 -1.028220 0.188654 0.593400 5.300000
1.193132 -0.801004 -0.953224 0.162135 0.593400 5.300000
1.102581 -0.814673 -0.878221 0.137625 0.593400 5.300000
1.019179 -0.825271 -0.803221 0.115117 0.593400 5.300000
0.943031 -0.833290 -0.728223 0.094631 0.593400 5.300000
0.874218 -0.839177 -0.653218 0.076135 0.593400 5.300000
0.812782 -0.843352 -0.578223 0.059661 0.593400 5.300000
0.758784 -0.846185 -0.503218 0.045189 0.593400 5.300000
0.712252 -0.848005 -0.428221 0.032717 0.593400 5.300000
0.673190 -0.849072 -0.353219 0.022262 0.593400 5.300000
0.641627 -0.849648 -0.278218 0.013809 0.593400 5.300000
0.617562 -0.849895 -0.203220 0.007371 0.593400 5.300000
0.600986 -0.849981 -0.128216 0.002937 0.593400 5.300000
