# Supplementary material for: Automatic Parking Controller with a Twin Artificial Neural Network Architecture
Source: Hindawi journal article supplement (doi:10.1155/2019/4801985), 2019-01-01
Supplement: f1 [file 4801985.f1.zip › data/data_135.txt]

7.200000 1.400000 0.000000 0.000000 0.000000 5.300000
7.196318 1.400000 -0.074999 0.000037 -0.021579 5.300000
7.184978 1.400000 -0.149999 0.000296 -0.053799 5.300000
7.166267 1.399987 -0.224998 0.000941 -0.085615 5.300000
7.139988 1.399949 -0.299997 0.002187 -0.117262 5.300000
7.106264 1.399842 -0.374996 0.004205 -0.148664 5.300000
7.064990 1.399610 -0.449995 0.007207 -0.179718 5.300000
7.016263 1.399162 -0.525006 0.011366 -0.210319 5.300000
6.960006 1.398364 -0.600004 0.016890 -0.239634 5.300000
6.896274 1.397077 -0.675003 0.023894 -0.264850 5.300000
6.825047 1.395066 -0.750003 0.032504 -0.289568 5.300000
6.746355 1.392111 -0.825002 0.042861 -0.314285 5.300000
6.660207 1.387893 -0.900001 0.055150 -0.339009 5.300000
6.566635 1.382066 -0.975001 0.069550 -0.363721 5.300000
6.465701 1.374191 -1.050000 0.086258 -0.387896 5.300000
6.357447 1.363809 -1.124999 0.105246 -0.405576 5.300000
6.241981 1.350393 -1.199998 0.126324 -0.417863 5.300000
6.119397 1.333391 -1.274998 0.149325 -0.425491 5.300000
5.989867 1.312275 -1.349997 0.174010 -0.427881 5.300000
5.853537 1.286465 -1.424995 0.200081 -0.425642 5.300000
5.710621 1.255468 -1.500006 0.227195 -0.418924 5.300000
5.561321 1.218736 -1.575005 0.255049 -0.408571 5.300000
5.405888 1.175847 -1.650004 0.283324 -0.395509 5.300000
5.244566 1.126355 -1.725003 0.311797 -0.380563 5.300000
5.077610 1.069885 -1.800003 0.340245 -0.364500 5.300000
4.905293 1.006114 -1.875002 0.368512 -0.347971 5.300000
4.727869 0.934703 -1.950356 0.396522 -0.331684 5.300000
4.546150 0.855638 -2.000000 0.423957 -0.312021 5.300000
4.364856 0.770961 -2.000000 0.449459 -0.284555 5.300000
4.185758 0.681950 -2.000000 0.472801 -0.261556 5.300000
4.008713 0.588930 -2.000000 0.494356 -0.242271 5.300000
3.833633 0.492263 -2.000000 0.514436 -0.226083 5.300000
3.660462 0.392202 -2.000000 0.533282 -0.212414 5.300000
3.489154 0.288991 -2.000000 0.551113 -0.201821 5.300000
3.319559 0.182989 -2.000000 0.564788 -0.122817 5.300000
3.151000 0.075344 -2.000000 0.570660 -0.024244 5.300000
2.983512 -0.032084 -1.964574 0.568777 0.075760 5.300000
2.820967 -0.135019 -1.885867 0.558984 0.175764 5.300000
2.663509 -0.231813 -1.810868 0.542190 0.275757 5.300000
2.510590 -0.321620 -1.735868 0.518391 0.375762 5.300000
2.361857 -0.403585 -1.660869 0.487852 0.475763 5.300000
2.217161 -0.477039 -1.585339 0.450339 0.585497 5.300000
2.076131 -0.541716 -1.514128 0.409081 0.593400 5.300000
1.939533 -0.597764 -1.439125 0.369558 0.593400 5.300000
1.807910 -0.645930 -1.364129 0.332046 0.593400 5.300000
1.681751 -0.686936 -1.289124 0.296535 0.593400 5.300000
1.561462 -0.721499 -1.214128 0.263035 0.593400 5.300000
1.447383 -0.750300 -1.139124 0.231540 0.593400 5.300000
1.339806 -0.773991 -1.064125 0.202054 0.593400 5.300000
1.238958 -0.793208 -0.989126 0.174580 0.593400 5.300000
1.145039 -0.808540 -0.914122 0.149107 0.593400 5.300000
1.058207 -0.820550 -0.839126 0.125644 0.593400 5.300000
0.978579 -0.829743 -0.764121 0.104184 0.593400 5.300000
0.906242 -0.836593 -0.689125 0.084738 0.593400 5.300000
0.841266 -0.841541 -0.614122 0.067298 0.593400 5.300000
0.783708 -0.844977 -0.539122 0.051862 0.593400 5.300000
0.733597 -0.847242 -0.464123 0.038434 0.593400 5.300000
0.690959 -0.848638 -0.389120 0.027023 0.593400 5.300000
0.655798 -0.849418 -0.314124 0.017612 0.593400 5.300000
0.628136 -0.849802 -0.239119 0.010202 0.593400 5.300000
0.607978 -0.849954 -0.164123 0.004804 0.593400 5.300000
0.595311 -0.849998 -0.089120 0.001418 0.593400 5.300000
