# Supplementary material for: Automatic Parking Controller with a Twin Artificial Neural Network Architecture
Source: Hindawi journal article supplement (doi:10.1155/2019/4801985), 2019-01-01
Supplement: f1 [file 4801985.f1.zip › data/data_136.txt]

7.300000 1.400000 0.000000 0.000000 0.000000 5.300000
7.296324 1.400000 -0.074998 0.000036 -0.019058 5.300000
7.284976 1.400000 -0.149996 0.000278 -0.049389 5.300000
7.266273 1.399987 -0.225005 0.000887 -0.079259 5.300000
7.239991 1.399952 -0.300002 0.002061 -0.108921 5.300000
7.206265 1.399851 -0.375000 0.003965 -0.138275 5.300000
7.164991 1.399632 -0.449998 0.006779 -0.167403 5.300000
7.116258 1.399209 -0.524997 0.010683 -0.194242 5.300000
7.060004 1.398468 -0.600005 0.015789 -0.218924 5.300000
6.996265 1.397258 -0.675002 0.022246 -0.243645 5.300000
6.925048 1.395400 -0.750000 0.030200 -0.268360 5.300000
6.846338 1.392642 -0.824998 0.039838 -0.293086 5.300000
6.760188 1.388731 -0.899996 0.051318 -0.317855 5.300000
6.666585 1.383292 -0.975002 0.064816 -0.341469 5.300000
6.565609 1.375965 -1.050002 0.080331 -0.360001 5.300000
6.457287 1.366297 -1.125000 0.097814 -0.375307 5.300000
6.341708 1.353832 -1.199998 0.117228 -0.387141 5.300000
6.218976 1.338061 -1.274996 0.138435 -0.395205 5.300000
6.089197 1.318468 -1.350004 0.161286 -0.399316 5.300000
5.952532 1.294535 -1.425002 0.185552 -0.399519 5.300000
5.809148 1.265721 -1.500000 0.211000 -0.396076 5.300000
5.659259 1.231551 -1.574998 0.237363 -0.389669 5.300000
5.503051 1.191498 -1.649996 0.264408 -0.380816 5.300000
5.340810 1.145163 -1.725005 0.291943 -0.370256 5.300000
5.172745 1.092076 -1.800002 0.319787 -0.358654 5.300000
4.999148 1.031864 -1.875000 0.347811 -0.346661 5.300000
4.820260 0.964129 -1.953779 0.375974 -0.335245 5.300000
4.636830 0.888701 -1.988481 0.403985 -0.319470 5.300000
4.454089 0.807682 -2.000000 0.430384 -0.296634 5.300000
4.273382 0.721980 -2.000000 0.454978 -0.277513 5.300000
4.094767 0.632004 -2.000000 0.478124 -0.262113 5.300000
3.918226 0.538018 -2.000000 0.500096 -0.249853 5.300000
3.743748 0.440266 -2.000000 0.521187 -0.240474 5.300000
3.571341 0.338908 -2.000000 0.541628 -0.231386 5.300000
3.400926 0.234236 -2.000000 0.559066 -0.172074 5.300000
3.231958 0.127227 -2.000000 0.568896 -0.072308 5.300000
3.063505 0.019154 -1.991113 0.570368 0.027688 5.300000
2.898414 -0.086240 -1.921984 0.564623 0.127690 5.300000
2.738606 -0.186114 -1.846925 0.551130 0.227692 5.300000
2.583553 -0.279369 -1.771926 0.530698 0.327693 5.300000
2.432847 -0.365212 -1.696919 0.503377 0.427686 5.300000
2.286209 -0.442857 -1.621911 0.469292 0.527877 5.300000
2.143409 -0.511760 -1.550139 0.428793 0.593400 5.300000
2.004605 -0.571851 -1.475182 0.388302 0.593400 5.300000
1.870528 -0.623708 -1.400178 0.349823 0.593400 5.300000
1.741689 -0.668069 -1.325179 0.313350 0.593400 5.300000
1.618530 -0.705646 -1.250179 0.278886 0.593400 5.300000
1.501426 -0.737129 -1.175176 0.246433 0.593400 5.300000
1.390689 -0.763200 -1.100180 0.215980 0.593400 5.300000
1.286584 -0.784495 -1.025175 0.187539 0.593400 5.300000
1.189318 -0.801625 -0.950179 0.161100 0.593400 5.300000
1.099054 -0.815160 -0.875175 0.136672 0.593400 5.300000
1.015945 -0.825645 -0.800177 0.114245 0.593400 5.300000
0.940094 -0.833567 -0.725177 0.093842 0.593400 5.300000
0.871579 -0.839376 -0.650174 0.075427 0.593400 5.300000
0.810446 -0.843491 -0.575178 0.059034 0.593400 5.300000
0.756750 -0.846276 -0.500172 0.044644 0.593400 5.300000
0.710520 -0.848062 -0.425177 0.032254 0.593400 5.300000
0.671763 -0.849104 -0.350173 0.021878 0.593400 5.300000
0.640502 -0.849664 -0.275174 0.013509 0.593400 5.300000
0.616741 -0.849901 -0.200174 0.007151 0.593400 5.300000
0.600472 -0.849983 -0.125171 0.002799 0.593400 5.300000
