# Supplementary material for: Automatic Parking Controller with a Twin Artificial Neural Network Architecture
Source: Hindawi journal article supplement (doi:10.1155/2019/4801985), 2019-01-01
Supplement: f1 [file 4801985.f1.zip › data/data_137.txt]

6.600000 1.500000 0.000000 0.000000 0.000000 5.300000
6.596280 1.500000 -0.075000 0.000062 -0.043612 5.300000
6.585016 1.500000 -0.150001 0.000422 -0.093387 5.300000
6.566242 1.499978 -0.224999 0.001414 -0.143778 5.300000
6.540016 1.499918 -0.300002 0.003317 -0.195310 5.300000
6.506239 1.499756 -0.374999 0.006509 -0.248534 5.300000
6.465009 1.499395 -0.450000 0.011338 -0.304424 5.300000
6.416250 1.498673 -0.524998 0.018269 -0.364671 5.300000
6.360025 1.497386 -0.599999 0.027868 -0.433585 5.300000
6.296315 1.495201 -0.674999 0.041078 -0.526890 5.300000
6.225150 1.491654 -0.749999 0.058679 -0.552458 5.300000
6.146588 1.486249 -0.825000 0.079216 -0.575146 5.300000
6.060695 1.478428 -0.899998 0.102118 -0.575156 5.300000
5.967566 1.467725 -0.975001 0.126993 -0.575036 5.300000
5.867309 1.453542 -1.049998 0.153871 -0.574956 5.300000
5.760106 1.435335 -1.124999 0.182732 -0.575188 5.300000
5.646128 1.412453 -1.199997 0.213593 -0.575522 5.300000
5.525643 1.384244 -1.274998 0.246440 -0.575131 5.300000
5.398942 1.350013 -1.349998 0.281265 -0.574113 5.300000
5.266382 1.309056 -1.424998 0.318093 -0.574529 5.300000
5.128398 1.260643 -1.499999 0.356943 -0.577159 5.300000
4.985464 1.203986 -1.574997 0.397845 -0.577573 5.300000
4.838156 1.138453 -1.650000 0.438548 -0.527230 5.300000
4.686746 1.063944 -1.724997 0.474699 -0.448700 5.300000
4.531313 0.980885 -1.799997 0.505717 -0.372888 5.300000
4.371810 0.889664 -1.874996 0.532296 -0.309986 5.300000
4.208157 0.790673 -1.952984 0.554867 -0.250859 5.300000
4.040600 0.684560 -1.990753 0.573255 -0.190187 5.300000
3.873409 0.574920 -2.000000 0.586681 -0.128041 5.300000
3.707373 0.463414 -2.000000 0.595259 -0.070243 5.300000
3.542054 0.350851 -2.000000 0.599542 -0.016417 5.300000
3.376938 0.238006 -2.000000 0.598904 0.029890 5.300000
3.211478 0.125648 -2.000000 0.593402 0.085989 5.300000
3.045275 0.014647 -1.990951 0.583511 0.143215 5.300000
2.881316 -0.092037 -1.917001 0.569382 0.195631 5.300000
2.722183 -0.192018 -1.841969 0.551804 0.248766 5.300000
2.567557 -0.285021 -1.766974 0.530180 0.339281 5.300000
2.417194 -0.370478 -1.691968 0.502026 0.439279 5.300000
2.270861 -0.447623 -1.616900 0.467054 0.540618 5.300000
2.128304 -0.515974 -1.545516 0.426071 0.593400 5.300000
1.989789 -0.575504 -1.470252 0.385716 0.593400 5.300000
1.856038 -0.626843 -1.395254 0.347372 0.593400 5.300000
1.727563 -0.670736 -1.320257 0.311030 0.593400 5.300000
1.604795 -0.707893 -1.245251 0.276699 0.593400 5.300000
1.488097 -0.739000 -1.170255 0.244368 0.593400 5.300000
1.377785 -0.764737 -1.095252 0.214051 0.593400 5.300000
1.274119 -0.785735 -1.020252 0.185737 0.593400 5.300000
1.177311 -0.802611 -0.945256 0.159431 0.593400 5.300000
1.087523 -0.815936 -0.870259 0.135137 0.593400 5.300000
1.004883 -0.826239 -0.795253 0.112853 0.593400 5.300000
0.929507 -0.834002 -0.720257 0.092571 0.593400 5.300000
0.861468 -0.839691 -0.645255 0.074291 0.593400 5.300000
0.800829 -0.843712 -0.570254 0.058023 0.593400 5.300000
0.747625 -0.846425 -0.495258 0.043767 0.593400 5.300000
0.701886 -0.848147 -0.420251 0.031512 0.593400 5.300000
0.663620 -0.849151 -0.345255 0.021267 0.593400 5.300000
0.632849 -0.849679 -0.270258 0.013034 0.593400 5.300000
0.609570 -0.849912 -0.195251 0.006804 0.593400 5.300000
0.593797 -0.849985 -0.120255 0.002580 0.593400 5.300000
