# Supplementary material for: Automatic Parking Controller with a Twin Artificial Neural Network Architecture
Source: Hindawi journal article supplement (doi:10.1155/2019/4801985), 2019-01-01
Supplement: f1 [file 4801985.f1.zip › data/data_138.txt]

6.700000 1.500000 0.000000 0.000000 0.000000 5.300000
6.696288 1.500000 -0.074996 0.000049 -0.038644 5.300000
6.685021 1.500000 -0.150004 0.000397 -0.084302 5.300000
6.666243 1.499979 -0.225001 0.001302 -0.130235 5.300000
6.640011 1.499932 -0.299998 0.003050 -0.176768 5.300000
6.606240 1.499777 -0.375002 0.005957 -0.224156 5.300000
6.565012 1.499444 -0.450002 0.010324 -0.272803 5.300000
6.516249 1.498794 -0.524998 0.016520 -0.323275 5.300000
6.460025 1.497635 -0.599998 0.024937 -0.376690 5.300000
6.396296 1.495694 -0.675002 0.036110 -0.435173 5.300000
6.325120 1.492623 -0.749999 0.050739 -0.504498 5.300000
6.246501 1.487906 -0.824996 0.069510 -0.541744 5.300000
6.160542 1.480979 -0.900004 0.091531 -0.568288 5.300000
6.067294 1.471256 -0.975000 0.116355 -0.574710 5.300000
5.966901 1.458149 -1.049996 0.143230 -0.574814 5.300000
5.859508 1.441089 -1.125004 0.172093 -0.575311 5.300000
5.745292 1.419410 -1.200001 0.202949 -0.575225 5.300000
5.624516 1.392494 -1.274998 0.235778 -0.574038 5.300000
5.497452 1.359605 -1.350002 0.270601 -0.573804 5.300000
5.364475 1.320080 -1.425002 0.307456 -0.576474 5.300000
5.225968 1.273120 -1.499998 0.346314 -0.578080 5.300000
5.082441 1.218029 -1.574998 0.386252 -0.551959 5.300000
4.934251 1.154475 -1.650002 0.422662 -0.470747 5.300000
4.781525 1.082723 -1.724999 0.454875 -0.409563 5.300000
4.624372 1.002941 -1.799996 0.483767 -0.355577 5.300000
4.462854 0.915336 -1.875004 0.509518 -0.304390 5.300000
4.297003 0.820108 -1.950002 0.532099 -0.254407 5.300000
4.127189 0.717843 -1.999662 0.551222 -0.202420 5.300000
3.957563 0.611730 -2.000000 0.566020 -0.147765 5.300000
3.789366 0.503516 -2.000000 0.576599 -0.097358 5.300000
3.622093 0.393872 -2.000000 0.583206 -0.049541 5.300000
3.455362 0.283421 -2.000000 0.586187 -0.006941 5.300000
3.288707 0.172836 -2.000000 0.584940 0.030215 5.300000
3.121668 0.062765 -2.000000 0.579641 0.077603 5.300000
2.955242 -0.045210 -1.952219 0.570791 0.120420 5.300000
2.793649 -0.147702 -1.875898 0.558792 0.193533 5.300000
2.636957 -0.243838 -1.800901 0.540682 0.294037 5.300000
2.484711 -0.332805 -1.725904 0.515601 0.394038 5.300000
2.336573 -0.413798 -1.650896 0.483733 0.494039 5.300000
2.192377 -0.486157 -1.575936 0.444997 0.593400 5.300000
2.051896 -0.549630 -1.504184 0.403728 0.593400 5.300000
1.915924 -0.604585 -1.429187 0.364468 0.593400 5.300000
1.785002 -0.651759 -1.354180 0.327219 0.593400 5.300000
1.659605 -0.691877 -1.279184 0.291977 0.593400 5.300000
1.540117 -0.725634 -1.204189 0.258741 0.593400 5.300000
1.426880 -0.753721 -1.129181 0.227517 0.593400 5.300000
1.320180 -0.776783 -1.054185 0.198294 0.593400 5.300000
1.220251 -0.795455 -0.979187 0.171084 0.593400 5.300000
1.127262 -0.810319 -0.904182 0.145882 0.593400 5.300000
1.041376 -0.821916 -0.829186 0.122683 0.593400 5.300000
0.962710 -0.830776 -0.754183 0.101496 0.593400 5.300000
0.891345 -0.837351 -0.679183 0.082311 0.593400 5.300000
0.827351 -0.842081 -0.604187 0.065138 0.593400 5.300000
0.770768 -0.845338 -0.529180 0.049965 0.593400 5.300000
0.721651 -0.847466 -0.454184 0.036804 0.593400 5.300000
0.680001 -0.848768 -0.379188 0.025655 0.593400 5.300000
0.645843 -0.849492 -0.304185 0.016513 0.593400 5.300000
0.619178 -0.849833 -0.229185 0.009376 0.593400 5.300000
0.600016 -0.849963 -0.154189 0.004240 0.593400 5.300000
0.588341 -0.850000 -0.079182 0.001116 0.593400 5.300000
