# Supplementary material for: Automatic Parking Controller with a Twin Artificial Neural Network Architecture
Source: Hindawi journal article supplement (doi:10.1155/2019/4801985), 2019-01-01
Supplement: f1 [file 4801985.f1.zip › data/data_139.txt]

6.800000 1.500000 0.000000 0.000000 0.000000 5.300000
6.796293 1.500000 -0.075000 0.000047 -0.034809 5.300000
6.785013 1.500000 -0.150001 0.000374 -0.077374 5.300000
6.766253 1.499980 -0.224997 0.001222 -0.119987 5.300000
6.740009 1.499936 -0.300002 0.002853 -0.162908 5.300000
6.706245 1.499789 -0.374998 0.005543 -0.206249 5.300000
6.665010 1.499486 -0.450003 0.009577 -0.250147 5.300000
6.616251 1.498878 -0.525000 0.015266 -0.294799 5.300000
6.560019 1.497815 -0.599995 0.022923 -0.340531 5.300000
6.496290 1.496039 -0.675002 0.032926 -0.387869 5.300000
6.425100 1.493256 -0.749996 0.045708 -0.437902 5.300000
6.346459 1.489028 -0.825003 0.061835 -0.497220 5.300000
6.260433 1.482861 -0.899998 0.081837 -0.526222 5.300000
6.167089 1.474125 -0.974996 0.104955 -0.550937 5.300000
6.066555 1.462212 -1.050000 0.131254 -0.572319 5.300000
5.958952 1.446426 -1.124997 0.160103 -0.575192 5.300000
5.844503 1.426133 -1.200002 0.190944 -0.574372 5.300000
5.723398 1.400647 -1.274998 0.223774 -0.573485 5.300000
5.595960 1.369313 -1.349999 0.258623 -0.575143 5.300000
5.462500 1.331364 -1.424998 0.295468 -0.577584 5.300000
5.323450 1.286092 -1.500000 0.333699 -0.556997 5.300000
5.179143 1.233060 -1.575000 0.369555 -0.491935 5.300000
5.029789 1.172294 -1.649995 0.402537 -0.440951 5.300000
4.875581 1.103771 -1.725001 0.433072 -0.394485 5.300000
4.716695 1.027511 -1.799996 0.461222 -0.350117 5.300000
4.553240 0.943582 -1.875002 0.486930 -0.306826 5.300000
4.385279 0.852076 -1.952894 0.510081 -0.264241 5.300000
4.213243 0.753450 -1.992663 0.530355 -0.218748 5.300000
4.041638 0.650821 -2.000000 0.546787 -0.169986 5.300000
3.871483 0.545700 -2.000000 0.559431 -0.125410 5.300000
3.702503 0.438729 -2.000000 0.568634 -0.083740 5.300000
3.534322 0.330492 -2.000000 0.574549 -0.043873 5.300000
3.366626 0.221503 -2.000000 0.577464 -0.007304 5.300000
3.199037 0.112336 -2.000000 0.576816 0.017984 5.300000
3.031333 0.003649 -1.982294 0.572649 0.057130 5.300000
2.867239 -0.101341 -1.910352 0.564831 0.148104 5.300000
2.708366 -0.200521 -1.835355 0.549869 0.248104 5.300000
2.554125 -0.292875 -1.760351 0.527981 0.348101 5.300000
2.404126 -0.377632 -1.685353 0.499210 0.448101 5.300000
2.258153 -0.453992 -1.610119 0.463613 0.552488 5.300000
2.115910 -0.521574 -1.538833 0.422431 0.593400 5.300000
1.977794 -0.580351 -1.463639 0.382252 0.593400 5.300000
1.844487 -0.631004 -1.388639 0.344086 0.593400 5.300000
1.716501 -0.674273 -1.313643 0.307920 0.593400 5.300000
1.594254 -0.710869 -1.238636 0.273766 0.593400 5.300000
1.478106 -0.741476 -1.163639 0.241613 0.593400 5.300000
1.368370 -0.766772 -1.088640 0.211471 0.593400 5.300000
1.265302 -0.787382 -1.013636 0.183337 0.593400 5.300000
1.169107 -0.803922 -0.938640 0.157207 0.593400 5.300000
1.079947 -0.816957 -0.863644 0.133090 0.593400 5.300000
0.997943 -0.827019 -0.788637 0.110984 0.593400 5.300000
0.923209 -0.834581 -0.713641 0.090879 0.593400 5.300000
0.855821 -0.840107 -0.638642 0.072775 0.593400 5.300000
0.795835 -0.843997 -0.563638 0.056683 0.593400 5.300000
0.743290 -0.846612 -0.488642 0.042604 0.593400 5.300000
0.698211 -0.848260 -0.413638 0.030529 0.593400 5.300000
0.660609 -0.849215 -0.338639 0.020461 0.593400 5.300000
0.630497 -0.849708 -0.263643 0.012404 0.593400 5.300000
0.607877 -0.849923 -0.188636 0.006349 0.593400 5.300000
0.592760 -0.849987 -0.113640 0.002304 0.593400 5.300000
