# Supplementary material for: Automatic Parking Controller with a Twin Artificial Neural Network Architecture
Source: Hindawi journal article supplement (doi:10.1155/2019/4801985), 2019-01-01
Supplement: f1 [file 4801985.f1.zip › data/data_140.txt]

6.900000 1.500000 0.000000 0.000000 0.000000 5.300000
6.896300 1.500000 -0.075000 0.000045 -0.031990 5.300000
6.885000 1.500000 -0.150000 0.000352 -0.072316 5.300000
6.866255 1.499981 -0.225000 0.001162 -0.112572 5.300000
6.840004 1.499939 -0.300000 0.002706 -0.152975 5.300000
6.806248 1.499801 -0.375000 0.005253 -0.193568 5.300000
6.765004 1.499505 -0.450000 0.009056 -0.234388 5.300000
6.716251 1.498943 -0.525000 0.014395 -0.275473 5.300000
6.660010 1.497939 -0.600001 0.021544 -0.316898 5.300000
6.596284 1.496272 -0.675000 0.030829 -0.358746 5.300000
6.525084 1.493675 -0.750001 0.042569 -0.401184 5.300000
6.446428 1.489753 -0.825000 0.057144 -0.445347 5.300000
6.360367 1.484085 -0.900001 0.074928 -0.481385 5.300000
6.266961 1.476098 -0.975000 0.095804 -0.506020 5.300000
6.166297 1.465230 -1.050001 0.119664 -0.530735 5.300000
6.058516 1.450797 -1.125001 0.146763 -0.555863 5.300000
5.943788 1.432075 -1.200001 0.177168 -0.574373 5.300000
5.822351 1.408261 -1.275001 0.210008 -0.574411 5.300000
5.694492 1.378679 -1.350001 0.244830 -0.574679 5.300000
5.560521 1.342587 -1.425001 0.281078 -0.557596 5.300000
5.420771 1.299521 -1.500001 0.316124 -0.510183 5.300000
5.275472 1.249246 -1.575001 0.349466 -0.468579 5.300000
5.124890 1.191610 -1.650002 0.381133 -0.428774 5.300000
4.969226 1.126459 -1.725001 0.411076 -0.389983 5.300000
4.808693 1.053725 -1.800002 0.439168 -0.351806 5.300000
4.643439 0.973384 -1.875001 0.465304 -0.313997 5.300000
4.473591 0.885485 -1.950256 0.489303 -0.276348 5.300000
4.299675 0.790373 -1.999221 0.510887 -0.235958 5.300000
4.126061 0.690914 -2.000000 0.528997 -0.191576 5.300000
3.954180 0.588660 -2.000000 0.543638 -0.151343 5.300000
3.783635 0.484187 -2.000000 0.555134 -0.114185 5.300000
3.614162 0.378002 -2.000000 0.563760 -0.079201 5.300000
3.445445 0.270587 -2.000000 0.569640 -0.045673 5.300000
3.277232 0.162407 -2.000000 0.573024 -0.013245 5.300000
3.109228 0.053910 -1.999566 0.573473 0.008774 5.300000
2.942749 -0.053259 -1.946770 0.569248 0.101094 5.300000
2.781525 -0.155259 -1.870177 0.557712 0.201673 5.300000
2.625191 -0.250896 -1.795179 0.538998 0.301668 5.300000
2.473265 -0.339266 -1.720177 0.513423 0.401667 5.300000
2.325433 -0.419642 -1.645179 0.481017 0.501668 5.300000
2.181510 -0.491332 -1.570829 0.441833 0.593400 5.300000
2.041355 -0.554113 -1.498461 0.400662 0.593400 5.300000
1.905750 -0.608448 -1.423464 0.361555 0.593400 5.300000
1.775236 -0.655058 -1.348457 0.324460 0.593400 5.300000
1.650275 -0.694669 -1.273461 0.289373 0.593400 5.300000
1.531253 -0.727969 -1.198466 0.256289 0.593400 5.300000
1.418506 -0.755649 -1.123458 0.225218 0.593400 5.300000
1.312315 -0.778354 -1.048462 0.196147 0.593400 5.300000
1.212910 -0.796715 -0.973466 0.169089 0.593400 5.300000
1.120457 -0.811313 -0.898459 0.144042 0.593400 5.300000
1.035115 -0.822684 -0.823463 0.120995 0.593400 5.300000
0.957005 -0.831353 -0.748462 0.099961 0.593400 5.300000
0.886199 -0.837771 -0.673460 0.080929 0.593400 5.300000
0.822772 -0.842377 -0.598464 0.063909 0.593400 5.300000
0.766759 -0.845537 -0.523458 0.048891 0.593400 5.300000
0.718211 -0.847591 -0.448461 0.035882 0.593400 5.300000
0.677129 -0.848841 -0.373465 0.024885 0.593400 5.300000
0.643541 -0.849528 -0.298465 0.015898 0.593400 5.300000
0.617447 -0.849849 -0.223462 0.008914 0.593400 5.300000
0.598858 -0.849968 -0.148466 0.003931 0.593400 5.300000
