# Supplementary material for: Automatic Parking Controller with a Twin Artificial Neural Network Architecture
Source: Hindawi journal article supplement (doi:10.1155/2019/4801985), 2019-01-01
Supplement: f1 [file 4801985.f1.zip › data/data_141.txt]

7.000000 1.500000 0.000000 -0.000000 0.000000 5.300000
6.996305 1.500000 -0.074997 0.000043 -0.029783 5.300000
6.984993 1.500000 -0.150004 0.000341 -0.068418 5.300000
6.966263 1.499983 -0.225002 0.001112 -0.106883 5.300000
6.939996 1.499933 -0.299999 0.002596 -0.145414 5.300000
6.906255 1.499813 -0.374996 0.005031 -0.184006 5.300000
6.864999 1.499533 -0.450003 0.008669 -0.222645 5.300000
6.816258 1.498989 -0.525001 0.013744 -0.261303 5.300000
6.760011 1.498026 -0.599998 0.020540 -0.299952 5.300000
6.696282 1.496446 -0.674998 0.029314 -0.338536 5.300000
6.625071 1.493976 -0.750002 0.040367 -0.376923 5.300000
6.546420 1.490267 -0.824999 0.053981 -0.414570 5.300000
6.460328 1.484922 -0.899996 0.070357 -0.442469 5.300000
6.366883 1.477455 -0.975005 0.089373 -0.467133 5.300000
6.266132 1.467329 -1.050001 0.111185 -0.491855 5.300000
6.158226 1.453947 -1.124998 0.135997 -0.516565 5.300000
6.043273 1.436583 -1.199995 0.164068 -0.541293 5.300000
5.921531 1.414479 -1.275003 0.195547 -0.561205 5.300000
5.793220 1.386810 -1.350000 0.228865 -0.547228 5.300000
5.658658 1.353063 -1.424997 0.262394 -0.521273 5.300000
5.518072 1.312754 -1.500002 0.295480 -0.490647 5.300000
5.371747 1.265600 -1.575002 0.327727 -0.458127 5.300000
5.219921 1.211280 -1.649999 0.358892 -0.424777 5.300000
5.062848 1.149623 -1.724996 0.388771 -0.391153 5.300000
4.900742 1.080461 -1.800000 0.417200 -0.357491 5.300000
4.733785 1.003729 -1.875000 0.444008 -0.323878 5.300000
4.562130 0.919364 -1.952306 0.469073 -0.290663 5.300000
4.386346 0.827657 -1.996163 0.492055 -0.254178 5.300000
4.211051 0.731379 -2.000000 0.511850 -0.212918 5.300000
4.037532 0.631933 -2.000000 0.528414 -0.176085 5.300000
3.865532 0.529874 -2.000000 0.542124 -0.142552 5.300000
3.694809 0.425702 -2.000000 0.553223 -0.111450 5.300000
3.525121 0.319839 -2.000000 0.561910 -0.082146 5.300000
3.356230 0.212708 -2.000000 0.568297 -0.054146 5.300000
3.187912 0.104662 -2.000000 0.572597 -0.026023 5.300000
3.020057 -0.003608 -1.980262 0.572102 0.054853 5.300000
2.856359 -0.108235 -1.905290 0.564036 0.154855 5.300000
2.697809 -0.206971 -1.830293 0.548615 0.254846 5.300000
2.543875 -0.298842 -1.755296 0.526247 0.354847 5.300000
2.394154 -0.383051 -1.680289 0.497032 0.454848 5.300000
2.248448 -0.458817 -1.604906 0.460928 0.561887 5.300000
2.106447 -0.525812 -1.533661 0.419656 0.593400 5.300000
1.968639 -0.584018 -1.458578 0.379612 0.593400 5.300000
1.835674 -0.634152 -1.383576 0.341581 0.593400 5.300000
1.708064 -0.676946 -1.308580 0.305551 0.593400 5.300000
1.586219 -0.713115 -1.233574 0.271532 0.593400 5.300000
1.470495 -0.743343 -1.158577 0.239515 0.593400 5.300000
1.361200 -0.768304 -1.083579 0.209508 0.593400 5.300000
1.258591 -0.788621 -1.008573 0.181511 0.593400 5.300000
1.162865 -0.804908 -0.933577 0.155516 0.593400 5.300000
1.074185 -0.817723 -0.858582 0.131534 0.593400 5.300000
0.992671 -0.827603 -0.783574 0.109564 0.593400 5.300000
0.918430 -0.835013 -0.708578 0.089595 0.593400 5.300000
0.851539 -0.840417 -0.633581 0.071626 0.593400 5.300000
0.792052 -0.844208 -0.558575 0.055669 0.593400 5.300000
0.740011 -0.846749 -0.483579 0.041725 0.593400 5.300000
0.695436 -0.848342 -0.408577 0.029787 0.593400 5.300000
0.658340 -0.849262 -0.333576 0.019854 0.593400 5.300000
0.628737 -0.849730 -0.258580 0.011933 0.593400 5.300000
0.606625 -0.849931 -0.183573 0.006013 0.593400 5.300000
0.592011 -0.849989 -0.108577 0.002103 0.593400 5.300000
