# Supplementary material for: Automatic Parking Controller with a Twin Artificial Neural Network Architecture
Source: Hindawi journal article supplement (doi:10.1155/2019/4801985), 2019-01-01
Supplement: f1 [file 4801985.f1.zip › data/data_142.txt]

7.100000 1.500000 0.000000 0.000000 0.000000 5.300000
7.096311 1.500000 -0.074999 0.000041 -0.027658 5.300000
7.084984 1.500000 -0.149999 0.000330 -0.064662 5.300000
7.066265 1.499983 -0.224998 0.001071 -0.101432 5.300000
7.039985 1.499936 -0.299998 0.002491 -0.138204 5.300000
7.006262 1.499821 -0.374997 0.004825 -0.174924 5.300000
6.964993 1.499549 -0.449997 0.008292 -0.211563 5.300000
6.916258 1.499035 -0.524996 0.013139 -0.248050 5.300000
6.860006 1.498117 -0.599996 0.019597 -0.284296 5.300000
6.796285 1.496612 -0.674995 0.027915 -0.320159 5.300000
6.725060 1.494252 -0.750002 0.038351 -0.356005 5.300000
6.646406 1.490748 -0.825004 0.051118 -0.385013 5.300000
6.560290 1.485693 -0.900003 0.066213 -0.409610 5.300000
6.466817 1.478690 -0.975003 0.083722 -0.434337 5.300000
6.366001 1.469217 -1.050002 0.103861 -0.459053 5.300000
6.257982 1.456716 -1.125002 0.126843 -0.483769 5.300000
6.142869 1.440527 -1.200001 0.152906 -0.509499 5.300000
6.020842 1.419930 -1.275001 0.181742 -0.517697 5.300000
5.892142 1.394239 -1.350000 0.212218 -0.511271 5.300000
5.756986 1.362876 -1.425000 0.243552 -0.495480 5.300000
5.615640 1.325361 -1.499999 0.275093 -0.473654 5.300000
5.468352 1.281257 -1.574998 0.306362 -0.448036 5.300000
5.315397 1.230256 -1.649998 0.337019 -0.420335 5.300000
5.156999 1.172047 -1.724997 0.366781 -0.391487 5.300000
4.993416 1.106470 -1.799997 0.395459 -0.362099 5.300000
4.824852 1.033324 -1.874996 0.422866 -0.332521 5.300000
4.651497 0.952546 -1.951000 0.448865 -0.303023 5.300000
4.473991 0.864314 -1.998813 0.473149 -0.270263 5.300000
4.296910 0.771196 -2.000000 0.494502 -0.232419 5.300000
4.121779 0.674624 -2.000000 0.512865 -0.198804 5.300000
3.948312 0.575078 -2.000000 0.528614 -0.168603 5.300000
3.776311 0.473028 -2.000000 0.542018 -0.141027 5.300000
3.605578 0.368861 -2.000000 0.553278 -0.115511 5.300000
3.435924 0.262948 -2.000000 0.562548 -0.091490 5.300000
3.267161 0.155623 -2.000000 0.570054 -0.070503 5.300000
3.098938 0.047270 -1.996937 0.573001 0.006235 5.300000
2.932757 -0.059657 -1.941019 0.568717 0.107767 5.300000
2.771856 -0.161281 -1.865600 0.556778 0.207772 5.300000
2.615798 -0.256510 -1.790601 0.537619 0.307765 5.300000
2.464127 -0.344399 -1.715601 0.511646 0.407771 5.300000
2.316543 -0.424271 -1.640602 0.478811 0.507773 5.300000
2.172840 -0.495421 -1.566906 0.439271 0.593400 5.300000
2.032947 -0.557662 -1.493885 0.398219 0.593400 5.300000
1.897638 -0.611504 -1.418889 0.359236 0.593400 5.300000
1.767451 -0.657666 -1.343882 0.322262 0.593400 5.300000
1.642840 -0.696874 -1.268886 0.287299 0.593400 5.300000
1.524192 -0.729812 -1.193890 0.254337 0.593400 5.300000
1.411838 -0.757170 -1.118882 0.223388 0.593400 5.300000
1.306054 -0.779592 -1.043887 0.194439 0.593400 5.300000
1.207070 -0.797706 -0.968891 0.167503 0.593400 5.300000
1.115048 -0.812093 -0.893884 0.142579 0.593400 5.300000
1.030141 -0.823286 -0.818887 0.119655 0.593400 5.300000
0.952475 -0.831804 -0.743889 0.098743 0.593400 5.300000
0.882115 -0.838099 -0.668884 0.079833 0.593400 5.300000
0.819141 -0.842607 -0.593888 0.062935 0.593400 5.300000
0.763584 -0.845691 -0.518884 0.048041 0.593400 5.300000
0.715493 -0.847688 -0.443885 0.035154 0.593400 5.300000
0.674867 -0.848896 -0.368889 0.024279 0.593400 5.300000
0.641734 -0.849555 -0.293891 0.015415 0.593400 5.300000
0.616095 -0.849861 -0.218886 0.008553 0.593400 5.300000
0.597962 -0.849972 -0.143890 0.003691 0.593400 5.300000
