# Supplementary material for: Automatic Parking Controller with a Twin Artificial Neural Network Architecture
Source: Hindawi journal article supplement (doi:10.1155/2019/4801985), 2019-01-01
Supplement: f1 [file 4801985.f1.zip › data/data_143.txt]

7.200000 1.500000 0.000000 0.000000 0.000000 5.300000
7.196319 1.500000 -0.074996 0.000039 -0.025382 5.300000
7.184984 1.500000 -0.150002 0.000320 -0.060645 5.300000
7.166269 1.499984 -0.224999 0.001022 -0.095620 5.300000
7.139984 1.499940 -0.299995 0.002381 -0.130517 5.300000
7.106261 1.499823 -0.375003 0.004597 -0.165283 5.300000
7.064989 1.499567 -0.449998 0.007898 -0.199849 5.300000
7.016264 1.499080 -0.524996 0.012492 -0.234117 5.300000
6.960010 1.498205 -0.600001 0.018603 -0.267961 5.300000
6.896284 1.496781 -0.674997 0.026454 -0.301202 5.300000
6.825065 1.494546 -0.749999 0.036264 -0.331270 5.300000
6.746378 1.491234 -0.825000 0.048086 -0.355803 5.300000
6.660266 1.486501 -0.899996 0.062010 -0.380526 5.300000
6.566741 1.479946 -0.975002 0.078221 -0.405239 5.300000
6.465885 1.471103 -1.049999 0.096934 -0.429962 5.300000
6.357762 1.459428 -1.124995 0.118340 -0.454905 5.300000
6.242501 1.444332 -1.200003 0.142511 -0.474191 5.300000
6.120247 1.425135 -1.274998 0.168935 -0.480023 5.300000
5.991201 1.401269 -1.349996 0.197020 -0.478183 5.300000
5.855551 1.372104 -1.425002 0.226269 -0.468823 5.300000
5.713544 1.337168 -1.499997 0.256135 -0.453679 5.300000
5.565427 1.295964 -1.574999 0.286190 -0.434331 5.300000
5.411435 1.248111 -1.650000 0.316036 -0.412186 5.300000
5.251856 1.193301 -1.724996 0.345404 -0.388339 5.300000
5.086900 1.131219 -1.800002 0.374064 -0.363521 5.300000
4.916823 1.061689 -1.874999 0.401816 -0.338271 5.300000
4.741827 0.984505 -1.951221 0.428541 -0.313226 5.300000
4.562587 0.899817 -2.000000 0.453905 -0.284833 5.300000
4.383828 0.810001 -2.000000 0.476651 -0.249887 5.300000
4.207073 0.716434 -2.000000 0.496661 -0.219561 5.300000
4.032101 0.619551 -2.000000 0.514307 -0.192763 5.300000
3.858769 0.519787 -2.000000 0.529876 -0.168743 5.300000
3.686904 0.417492 -2.000000 0.543580 -0.146967 5.300000
3.516373 0.313004 -2.000000 0.555604 -0.126978 5.300000
3.347026 0.206596 -2.000000 0.566050 -0.105478 5.300000
3.178638 0.098688 -2.000000 0.572831 -0.038523 5.300000
3.010893 -0.009502 -1.980809 0.572037 0.060398 5.300000
2.847438 -0.113894 -1.901133 0.563329 0.160401 5.300000
2.689149 -0.212250 -1.826128 0.547583 0.260397 5.300000
2.535459 -0.303736 -1.751132 0.524793 0.360402 5.300000
2.385956 -0.387480 -1.676125 0.495222 0.460397 5.300000
2.240483 -0.462754 -1.600637 0.458700 0.569357 5.300000
2.098681 -0.529267 -1.529429 0.417382 0.593400 5.300000
1.961128 -0.587005 -1.454417 0.377449 0.593400 5.300000
1.828446 -0.636715 -1.379413 0.339528 0.593400 5.300000
1.701147 -0.679122 -1.304417 0.303608 0.593400 5.300000
1.579632 -0.714943 -1.229413 0.269701 0.593400 5.300000
1.464258 -0.744860 -1.154414 0.237797 0.593400 5.300000
1.355328 -0.769547 -1.079417 0.207901 0.593400 5.300000
1.253097 -0.789626 -1.004410 0.180017 0.593400 5.300000
1.157757 -0.805707 -0.929414 0.154133 0.593400 5.300000
1.069472 -0.818343 -0.854419 0.130261 0.593400 5.300000
0.988360 -0.828075 -0.779411 0.108402 0.593400 5.300000
0.914526 -0.835362 -0.704415 0.088545 0.593400 5.300000
0.848045 -0.840666 -0.629419 0.070689 0.593400 5.300000
0.788969 -0.844378 -0.554412 0.054843 0.593400 5.300000
0.737341 -0.846859 -0.479416 0.041009 0.593400 5.300000
0.693179 -0.848408 -0.404416 0.029183 0.593400 5.300000
0.656500 -0.849299 -0.329413 0.019361 0.593400 5.300000
0.627313 -0.849747 -0.254417 0.011551 0.593400 5.300000
0.605621 -0.849937 -0.179412 0.005744 0.593400 5.300000
0.591427 -0.849990 -0.104414 0.001947 0.593400 5.300000
