# Supplementary material for: Automatic Parking Controller with a Twin Artificial Neural Network Architecture
Source: Hindawi journal article supplement (doi:10.1155/2019/4801985), 2019-01-01
Supplement: f1 [file 4801985.f1.zip › data/data_144.txt]

7.300000 1.500000 0.000000 0.000000 0.000000 5.300000
7.296329 1.500000 -0.075000 0.000038 -0.023100 5.300000
7.284981 1.500000 -0.149999 0.000302 -0.056649 5.300000
7.266271 1.499985 -0.225001 0.000976 -0.089838 5.300000
7.239987 1.499943 -0.299998 0.002275 -0.122901 5.300000
7.206268 1.499832 -0.375002 0.004377 -0.155746 5.300000
7.164998 1.499592 -0.449998 0.007512 -0.188308 5.300000
7.116255 1.499120 -0.525002 0.011862 -0.220454 5.300000
7.060014 1.498295 -0.599997 0.017638 -0.252226 5.300000
6.996271 1.496938 -0.675002 0.025032 -0.281218 5.300000
6.925063 1.494843 -0.749996 0.034151 -0.306089 5.300000
6.846362 1.491724 -0.825002 0.045097 -0.330808 5.300000
6.760235 1.487292 -0.899995 0.058035 -0.355524 5.300000
6.666684 1.481155 -0.975001 0.073171 -0.380246 5.300000
6.565776 1.472881 -1.049995 0.090680 -0.404968 5.300000
6.457576 1.461964 -1.125001 0.110718 -0.427357 5.300000
6.342192 1.447834 -1.199995 0.133076 -0.440316 5.300000
6.219744 1.429934 -1.275000 0.157417 -0.447082 5.300000
6.090396 1.407676 -1.349995 0.183451 -0.447629 5.300000
5.954342 1.380509 -1.424999 0.210759 -0.442614 5.300000
5.811774 1.347883 -1.499996 0.238953 -0.432285 5.300000
5.662953 1.309352 -1.574998 0.267630 -0.418003 5.300000
5.508077 1.264451 -1.649997 0.296455 -0.400767 5.300000
5.347421 1.212823 -1.724997 0.325151 -0.381570 5.300000
5.181240 1.154142 -1.799998 0.353489 -0.361174 5.300000
5.009762 1.088119 -1.874997 0.381277 -0.340177 5.300000
4.833218 1.014523 -1.952628 0.408393 -0.319274 5.300000
4.652303 0.933360 -1.992104 0.434524 -0.294370 5.300000
4.471937 0.846989 -2.000000 0.458331 -0.263497 5.300000
4.293556 0.756549 -2.000000 0.479673 -0.236525 5.300000
4.117038 0.662517 -2.000000 0.498924 -0.213072 5.300000
3.942277 0.565270 -2.000000 0.516352 -0.192471 5.300000
3.769154 0.465138 -2.000000 0.532194 -0.174249 5.300000
3.597563 0.362393 -2.000000 0.546640 -0.157985 5.300000
3.427416 0.257282 -2.000000 0.559949 -0.145131 5.300000
3.258553 0.150113 -2.000000 0.570257 -0.089782 5.300000
3.090301 0.041680 -1.995634 0.572813 0.012864 5.300000
2.924438 -0.064952 -1.936930 0.568370 0.112860 5.300000
2.763798 -0.166301 -1.861782 0.555959 0.212861 5.300000
2.607981 -0.261166 -1.786788 0.536478 0.312863 5.300000
2.456522 -0.348673 -1.711783 0.510136 0.412859 5.300000
2.309135 -0.428110 -1.636788 0.476956 0.512856 5.300000
2.165618 -0.498802 -1.563669 0.437121 0.593400 5.300000
2.025944 -0.560601 -1.490067 0.396186 0.593400 5.300000
1.890883 -0.614033 -1.415071 0.357306 0.593400 5.300000
1.760971 -0.659822 -1.340065 0.320434 0.593400 5.300000
1.636654 -0.698696 -1.265068 0.285573 0.593400 5.300000
1.518319 -0.731334 -1.190072 0.252714 0.593400 5.300000
1.406293 -0.758425 -1.115065 0.221866 0.593400 5.300000
1.300849 -0.780613 -1.040069 0.193020 0.593400 5.300000
1.202215 -0.798523 -0.965073 0.166186 0.593400 5.300000
1.110554 -0.812735 -0.890068 0.141364 0.593400 5.300000
1.026013 -0.823780 -0.815070 0.118543 0.593400 5.300000
0.948715 -0.832174 -0.740073 0.097732 0.593400 5.300000
0.878729 -0.838368 -0.665066 0.078924 0.593400 5.300000
0.816132 -0.842796 -0.590070 0.062128 0.593400 5.300000
0.760955 -0.845817 -0.515068 0.047337 0.593400 5.300000
0.713245 -0.847767 -0.440067 0.034552 0.593400 5.300000
0.673001 -0.848941 -0.365071 0.023780 0.593400 5.300000
0.640249 -0.849577 -0.290075 0.015018 0.593400 5.300000
0.614990 -0.849870 -0.215068 0.008257 0.593400 5.300000
0.597235 -0.849975 -0.140072 0.003497 0.593400 5.300000
