# Supplementary material for: Automatic Parking Controller with a Twin Artificial Neural Network Architecture
Source: Hindawi journal article supplement (doi:10.1155/2019/4801985), 2019-01-01
Supplement: f1 [file 4801985.f1.zip › data/data_145.txt]

6.700000 1.600000 0.000000 0.000000 -0.000000 5.300000
6.696294 1.600000 -0.075002 0.000063 -0.043897 5.300000
6.685014 1.600000 -0.150004 0.000433 -0.093998 5.300000
6.666247 1.599980 -0.224996 0.001424 -0.144770 5.300000
6.640015 1.599923 -0.299998 0.003343 -0.196752 5.300000
6.606243 1.599750 -0.375001 0.006555 -0.250564 5.300000
6.565009 1.599392 -0.450003 0.011430 -0.307260 5.300000
6.516251 1.598662 -0.525005 0.018435 -0.368715 5.300000
6.460028 1.597365 -0.599996 0.028166 -0.440346 5.300000
6.396307 1.595150 -0.674999 0.041600 -0.524514 5.300000
6.325156 1.591581 -0.750001 0.059160 -0.553352 5.300000
6.246592 1.586124 -0.825003 0.079690 -0.574428 5.300000
6.160707 1.578280 -0.900002 0.102568 -0.574741 5.300000
6.067574 1.567510 -0.974997 0.127451 -0.574535 5.300000
5.967329 1.553303 -1.049999 0.154323 -0.574846 5.300000
5.860124 1.535041 -1.125002 0.183184 -0.575364 5.300000
5.746171 1.512107 -1.200004 0.214037 -0.574828 5.300000
5.625692 1.483839 -1.275006 0.246870 -0.574211 5.300000
5.499003 1.449557 -1.349997 0.281707 -0.574547 5.300000
5.366463 1.408551 -1.425000 0.318547 -0.576088 5.300000
5.228493 1.360059 -1.500002 0.357359 -0.575733 5.300000
5.085595 1.303367 -1.575004 0.398127 -0.572034 5.300000
4.938328 1.237689 -1.649999 0.440211 -0.550768 5.300000
4.787122 1.162806 -1.724998 0.478260 -0.470252 5.300000
4.632062 1.079023 -1.800001 0.511068 -0.391957 5.300000
4.473110 0.986857 -1.875003 0.539022 -0.325177 5.300000
4.310202 0.886654 -1.950684 0.562829 -0.264946 5.300000
4.143658 0.779192 -2.000000 0.582346 -0.203892 5.300000
3.977422 0.667855 -2.000000 0.596884 -0.141027 5.300000
3.812595 0.554576 -2.000000 0.606536 -0.083167 5.300000
3.648609 0.440082 -2.000000 0.611753 -0.028265 5.300000
3.484966 0.325098 -2.000000 0.612399 0.016611 5.300000
3.321114 0.210416 -2.000000 0.608127 0.070362 5.300000
3.156492 0.096784 -2.000000 0.599483 0.128102 5.300000
2.991167 -0.014693 -1.970958 0.586185 0.184428 5.300000
2.829258 -0.120297 -1.895556 0.568916 0.237523 5.300000
2.671727 -0.218816 -1.820554 0.548177 0.289674 5.300000
2.518473 -0.309962 -1.745559 0.523768 0.371705 5.300000
2.369347 -0.393215 -1.670560 0.493333 0.472710 5.300000
2.224190 -0.467907 -1.595016 0.455867 0.582373 5.300000
2.082638 -0.533767 -1.523938 0.414398 0.593400 5.300000
1.945428 -0.590893 -1.448939 0.374611 0.593400 5.300000
1.813125 -0.640049 -1.373940 0.336834 0.593400 5.300000
1.686235 -0.681954 -1.298942 0.301068 0.593400 5.300000
1.565147 -0.717317 -1.223932 0.267304 0.593400 5.300000
1.450248 -0.746833 -1.148934 0.235547 0.593400 5.300000
1.341796 -0.771157 -1.073935 0.205799 0.593400 5.300000
1.240066 -0.790933 -0.998936 0.178059 0.593400 5.300000
1.145227 -0.806738 -0.923937 0.152321 0.593400 5.300000
1.057460 -0.819150 -0.848938 0.128594 0.593400 5.300000
0.976884 -0.828679 -0.773939 0.106876 0.593400 5.300000
0.903585 -0.835813 -0.698940 0.087168 0.593400 5.300000
0.837647 -0.840987 -0.623941 0.069465 0.593400 5.300000
0.779109 -0.844599 -0.548942 0.053766 0.593400 5.300000
0.728023 -0.846998 -0.473943 0.040076 0.593400 5.300000
0.684403 -0.848494 -0.398935 0.028397 0.593400 5.300000
0.648275 -0.849344 -0.323935 0.018727 0.593400 5.300000
0.619634 -0.849771 -0.248936 0.011062 0.593400 5.300000
0.598492 -0.849944 -0.173938 0.005398 0.593400 5.300000
0.584852 -0.849993 -0.098939 0.001749 0.593400 5.300000
