# Supplementary material for: Automatic Parking Controller with a Twin Artificial Neural Network Architecture
Source: Hindawi journal article supplement (doi:10.1155/2019/4801985), 2019-01-01
Supplement: f1 [file 4801985.f1.zip › data/data_146.txt]

6.800000 1.600000 0.000000 0.000000 0.000000 5.300000
6.796296 1.600000 -0.074999 0.000057 -0.039082 5.300000
6.785008 1.600000 -0.149998 0.000399 -0.085210 5.300000
6.766249 1.599981 -0.225003 0.001318 -0.131656 5.300000
6.740002 1.599927 -0.299996 0.003088 -0.178786 5.300000
6.706247 1.599775 -0.375001 0.006021 -0.226875 5.300000
6.665009 1.599437 -0.450004 0.010440 -0.276398 5.300000
6.616256 1.598779 -0.524999 0.016724 -0.328040 5.300000
6.560020 1.597608 -0.600003 0.025285 -0.383164 5.300000
6.496299 1.595641 -0.674997 0.036683 -0.444303 5.300000
6.425120 1.592512 -0.750002 0.051706 -0.521234 5.300000
6.346519 1.587685 -0.824999 0.070982 -0.547893 5.300000
6.260566 1.580628 -0.900000 0.093263 -0.571067 5.300000
6.167336 1.570731 -0.974997 0.118113 -0.574474 5.300000
6.066966 1.557466 -1.049998 0.144981 -0.574779 5.300000
5.959593 1.540194 -1.125003 0.173842 -0.574850 5.300000
5.845426 1.518337 -1.199996 0.204681 -0.574144 5.300000
5.724687 1.491185 -1.275001 0.237518 -0.573889 5.300000
5.597699 1.458099 -1.350003 0.272360 -0.575495 5.300000
5.464766 1.418324 -1.424999 0.309199 -0.576308 5.300000
5.326359 1.371142 -1.500001 0.347966 -0.572662 5.300000
5.182930 1.315770 -1.574997 0.388658 -0.566504 5.300000
5.034954 1.251750 -1.650002 0.426988 -0.494087 5.300000
4.882596 1.179191 -1.724997 0.460670 -0.424122 5.300000
4.725953 1.098431 -1.800000 0.490613 -0.367151 5.300000
4.565086 1.009633 -1.874995 0.517253 -0.314245 5.300000
4.399993 0.913058 -1.952804 0.540599 -0.263200 5.300000
4.230999 0.809230 -1.988992 0.560427 -0.209911 5.300000
4.062520 0.701591 -2.000000 0.575805 -0.154515 5.300000
3.895420 0.591693 -2.000000 0.586903 -0.103441 5.300000
3.729315 0.480288 -2.000000 0.594007 -0.055065 5.300000
3.563808 0.368009 -2.000000 0.597485 -0.010149 5.300000
3.398437 0.255520 -2.000000 0.596719 0.024615 5.300000
3.232763 0.143489 -2.000000 0.591776 0.072279 5.300000
3.066315 0.032577 -1.993704 0.583144 0.120694 5.300000
2.901566 -0.074744 -1.929104 0.570907 0.164200 5.300000
2.741666 -0.175813 -1.854075 0.555692 0.224924 5.300000
2.586443 -0.270165 -1.779076 0.535234 0.328019 5.300000
2.435498 -0.357026 -1.704071 0.507793 0.428019 5.300000
2.288561 -0.435656 -1.629077 0.473523 0.528027 5.300000
2.145412 -0.505470 -1.557425 0.432827 0.593400 5.300000
2.006166 -0.566395 -1.482456 0.392148 0.593400 5.300000
1.871610 -0.619017 -1.407458 0.353471 0.593400 5.300000
1.742245 -0.664072 -1.332459 0.316802 0.593400 5.300000
1.618518 -0.702276 -1.257456 0.282142 0.593400 5.300000
1.500811 -0.734321 -1.182451 0.249489 0.593400 5.300000
1.389447 -0.760891 -1.107452 0.218849 0.593400 5.300000
1.284683 -0.782623 -1.032453 0.190209 0.593400 5.300000
1.186741 -0.800128 -0.957454 0.163580 0.593400 5.300000
1.095805 -0.813988 -0.882455 0.138953 0.593400 5.300000
1.011996 -0.824748 -0.807456 0.116340 0.593400 5.300000
0.935440 -0.832893 -0.732457 0.095730 0.593400 5.300000
0.866205 -0.838896 -0.657458 0.077129 0.593400 5.300000
0.804356 -0.843153 -0.582459 0.060538 0.593400 5.300000
0.749936 -0.846055 -0.507460 0.045948 0.593400 5.300000
0.702974 -0.847920 -0.432462 0.033367 0.593400 5.300000
0.663494 -0.849030 -0.357452 0.022800 0.593400 5.300000
0.631509 -0.849623 -0.282453 0.014239 0.593400 5.300000
0.607019 -0.849888 -0.207455 0.007677 0.593400 5.300000
0.590018 -0.849980 -0.132456 0.003134 0.593400 5.300000
