# Supplementary material for: Automatic Parking Controller with a Twin Artificial Neural Network Architecture
Source: Hindawi journal article supplement (doi:10.1155/2019/4801985), 2019-01-01
Supplement: f1 [file 4801985.f1.zip › data/data_147.txt]

6.900000 1.600000 0.000000 0.000000 0.000000 5.300000
6.896302 1.600000 -0.074998 0.000056 -0.035360 5.300000
6.884999 1.600000 -0.149995 0.000377 -0.078477 5.300000
6.866257 1.599982 -0.224998 0.001235 -0.121704 5.300000
6.840002 1.599931 -0.300001 0.002887 -0.165287 5.300000
6.806253 1.599788 -0.374998 0.005623 -0.209388 5.300000
6.764997 1.599477 -0.449996 0.009721 -0.254178 5.300000
6.716259 1.598867 -0.524999 0.015493 -0.299935 5.300000
6.660014 1.597780 -0.600001 0.023297 -0.347100 5.300000
6.596294 1.595978 -0.674999 0.033522 -0.396466 5.300000
6.525092 1.593134 -0.749997 0.046632 -0.449591 5.300000
6.446471 1.588823 -0.825000 0.063297 -0.506696 5.300000
6.360445 1.582494 -0.900002 0.083784 -0.536149 5.300000
6.267133 1.573568 -0.975000 0.107442 -0.561866 5.300000
6.166613 1.561371 -1.049998 0.134118 -0.574788 5.300000
6.059071 1.545283 -1.125001 0.162958 -0.574337 5.300000
5.944667 1.524650 -1.200003 0.193794 -0.573352 5.300000
5.823649 1.498832 -1.275000 0.226637 -0.574465 5.300000
5.696287 1.467119 -1.349998 0.261498 -0.576706 5.300000
5.562951 1.428806 -1.425002 0.298286 -0.574036 5.300000
5.424023 1.383113 -1.500004 0.337088 -0.570023 5.300000
5.279942 1.329493 -1.575001 0.374572 -0.511735 5.300000
5.130932 1.267872 -1.649999 0.408820 -0.453902 5.300000
4.977196 1.198315 -1.725002 0.440255 -0.404061 5.300000
4.818882 1.120851 -1.800004 0.469093 -0.357473 5.300000
4.656125 1.035588 -1.875001 0.495331 -0.312470 5.300000
4.488974 0.942646 -1.950240 0.518887 -0.268267 5.300000
4.317926 0.842540 -2.000000 0.539448 -0.221722 5.300000
4.147147 0.738269 -2.000000 0.556101 -0.171644 5.300000
3.977992 0.631555 -2.000000 0.568841 -0.125983 5.300000
3.810024 0.522995 -2.000000 0.578042 -0.083302 5.300000
3.642866 0.413182 -2.000000 0.583902 -0.042345 5.300000
3.476189 0.302644 -2.000000 0.586715 -0.004518 5.300000
3.309606 0.191969 -2.000000 0.585760 0.021064 5.300000
3.142725 0.081719 -2.000000 0.581235 0.062212 5.300000
2.975974 -0.026985 -1.966481 0.573695 0.101473 5.300000
2.813686 -0.130723 -1.888133 0.562778 0.182227 5.300000
2.656377 -0.228190 -1.813129 0.545453 0.282611 5.300000
2.503531 -0.318570 -1.738128 0.521091 0.382609 5.300000
2.354798 -0.401013 -1.663131 0.489941 0.482611 5.300000
2.210021 -0.474831 -1.587705 0.451811 0.590198 5.300000
2.068849 -0.539801 -1.516513 0.410369 0.593400 5.300000
1.932102 -0.596103 -1.441515 0.370783 0.593400 5.300000
1.800314 -0.644508 -1.366516 0.333203 0.593400 5.300000
1.673983 -0.685736 -1.291517 0.297636 0.593400 5.300000
1.553491 -0.720491 -1.216508 0.264069 0.593400 5.300000
1.439219 -0.749461 -1.141509 0.232512 0.593400 5.300000
1.331420 -0.773310 -1.066510 0.202965 0.593400 5.300000
1.230364 -0.792664 -0.991511 0.175422 0.593400 5.300000
1.136223 -0.808108 -0.916512 0.149884 0.593400 5.300000
1.049161 -0.820213 -0.841513 0.126355 0.593400 5.300000
0.969302 -0.829483 -0.766514 0.104836 0.593400 5.300000
0.896728 -0.836404 -0.691515 0.085328 0.593400 5.300000
0.831520 -0.841410 -0.616516 0.067821 0.593400 5.300000
0.773718 -0.844884 -0.541517 0.052323 0.593400 5.300000
0.723371 -0.847181 -0.466518 0.038830 0.593400 5.300000
0.680494 -0.848602 -0.391509 0.027351 0.593400 5.300000
0.645109 -0.849401 -0.316511 0.017881 0.593400 5.300000
0.617205 -0.849797 -0.241512 0.010412 0.593400 5.300000
0.596805 -0.849952 -0.166513 0.004943 0.593400 5.300000
0.583901 -0.849997 -0.091514 0.001495 0.593400 5.300000
