# Supplementary material for: Automatic Parking Controller with a Twin Artificial Neural Network Architecture
Source: Hindawi journal article supplement (doi:10.1155/2019/4801985), 2019-01-01
Supplement: f1 [file 4801985.f1.zip › data/data_148.txt]

7.000000 1.600000 0.000000 0.000000 0.000000 5.300000
6.996312 1.600000 -0.075001 0.000054 -0.032476 5.300000
6.984988 1.600000 -0.150001 0.000356 -0.073312 5.300000
6.966259 1.599983 -0.225002 0.001177 -0.114113 5.300000
6.939996 1.599934 -0.300003 0.002745 -0.155106 5.300000
6.906260 1.599800 -0.375004 0.005321 -0.196345 5.300000
6.864991 1.599505 -0.450005 0.009185 -0.237895 5.300000
6.816260 1.598930 -0.524994 0.014600 -0.279850 5.300000
6.760012 1.597903 -0.599996 0.021876 -0.322327 5.300000
6.696289 1.596216 -0.674997 0.031327 -0.365520 5.300000
6.625082 1.593571 -0.749997 0.043324 -0.409764 5.300000
6.546442 1.589587 -0.824998 0.058256 -0.456445 5.300000
6.460383 1.583784 -0.899999 0.076628 -0.494396 5.300000
6.366996 1.575622 -0.975000 0.098158 -0.519117 5.300000
6.266357 1.564473 -1.050000 0.122750 -0.543830 5.300000
6.158632 1.549675 -1.125001 0.150639 -0.567865 5.300000
6.043978 1.530455 -1.200002 0.181413 -0.573345 5.300000
5.922650 1.506147 -1.275003 0.214271 -0.575865 5.300000
5.794904 1.476009 -1.350003 0.249095 -0.575663 5.300000
5.661107 1.439352 -1.425004 0.285771 -0.568159 5.300000
5.521577 1.395524 -1.499999 0.322124 -0.526824 5.300000
5.376621 1.344307 -1.574996 0.356488 -0.479147 5.300000
5.226465 1.285549 -1.649996 0.388870 -0.436166 5.300000
5.071328 1.219160 -1.724997 0.419304 -0.395117 5.300000
4.911415 1.145075 -1.799998 0.447747 -0.355139 5.300000
4.746864 1.063298 -1.874998 0.474090 -0.315774 5.300000
4.577776 0.973887 -1.953497 0.498195 -0.276938 5.300000
4.404615 0.877184 -1.989143 0.519752 -0.234802 5.300000
4.232037 0.776286 -2.000000 0.537702 -0.189230 5.300000
4.061034 0.672558 -2.000000 0.552097 -0.147744 5.300000
3.891368 0.566672 -2.000000 0.563264 -0.109346 5.300000
3.722737 0.459148 -2.000000 0.571456 -0.073103 5.300000
3.554822 0.350491 -2.000000 0.576794 -0.038154 5.300000
3.387360 0.241149 -2.000000 0.579564 -0.005368 5.300000
3.220001 0.131631 -2.000000 0.579067 0.012186 5.300000
3.052331 0.022379 -1.990771 0.575410 0.045318 5.300000
2.887624 -0.083756 -1.922613 0.568471 0.136638 5.300000
2.728111 -0.184224 -1.847613 0.554284 0.236642 5.300000
2.573260 -0.277947 -1.772612 0.533151 0.336640 5.300000
2.422680 -0.364152 -1.697611 0.505102 0.436635 5.300000
2.276085 -0.442011 -1.622528 0.470236 0.538105 5.300000
2.133239 -0.511066 -1.551236 0.429240 0.593400 5.300000
1.994376 -0.571246 -1.475992 0.388735 0.593400 5.300000
1.860247 -0.623188 -1.400993 0.350230 0.593400 5.300000
1.731353 -0.667624 -1.325994 0.313735 0.593400 5.300000
1.608128 -0.705270 -1.250989 0.279250 0.593400 5.300000
1.490959 -0.736819 -1.175986 0.246769 0.593400 5.300000
1.380153 -0.762944 -1.100987 0.216300 0.593400 5.300000
1.275971 -0.784289 -1.025988 0.187835 0.593400 5.300000
1.178624 -0.801459 -0.950989 0.161379 0.593400 5.300000
1.088296 -0.815032 -0.875990 0.136923 0.593400 5.300000
1.005110 -0.825547 -0.800991 0.114481 0.593400 5.300000
0.929179 -0.833490 -0.725992 0.094045 0.593400 5.300000
0.860582 -0.839325 -0.650993 0.075619 0.593400 5.300000
0.799373 -0.843451 -0.575994 0.059201 0.593400 5.300000
0.745597 -0.846253 -0.500995 0.044784 0.593400 5.300000
0.699276 -0.848042 -0.425997 0.032376 0.593400 5.300000
0.660440 -0.849101 -0.350988 0.021981 0.593400 5.300000
0.629100 -0.849655 -0.275989 0.013594 0.593400 5.300000
0.605256 -0.849902 -0.200990 0.007207 0.593400 5.300000
0.588909 -0.849983 -0.125991 0.002837 0.593400 5.300000
