# Supplementary material for: Automatic Parking Controller with a Twin Artificial Neural Network Architecture
Source: Hindawi journal article supplement (doi:10.1155/2019/4801985), 2019-01-01
Supplement: f1 [file 4801985.f1.zip › data/data_149.txt]

7.100000 1.600000 0.000000 0.000000 0.000000 5.300000
7.096322 1.600000 -0.075002 0.000044 -0.030268 5.300000
7.084987 1.600000 -0.150004 0.000345 -0.069396 5.300000
7.066265 1.599984 -0.225002 0.001127 -0.108396 5.300000
7.039990 1.599938 -0.299997 0.002637 -0.147484 5.300000
7.006261 1.599803 -0.374999 0.005098 -0.186677 5.300000
6.964989 1.599524 -0.450001 0.008788 -0.225964 5.300000
6.916259 1.598978 -0.525003 0.013943 -0.265370 5.300000
6.860003 1.598000 -0.600005 0.020848 -0.304873 5.300000
6.796293 1.596396 -0.674996 0.029779 -0.344455 5.300000
6.725077 1.593875 -0.749998 0.041044 -0.384075 5.300000
6.646425 1.590110 -0.825000 0.054938 -0.423789 5.300000
6.560339 1.584661 -0.900002 0.071780 -0.456078 5.300000
6.466906 1.577029 -0.975004 0.091454 -0.480439 5.300000
6.366190 1.566664 -1.050001 0.113968 -0.505157 5.300000
6.258314 1.552931 -1.124997 0.139580 -0.529875 5.300000
6.143441 1.535116 -1.199999 0.168523 -0.554820 5.300000
6.021791 1.512400 -1.275001 0.200978 -0.577168 5.300000
5.893675 1.483979 -1.350003 0.235511 -0.564322 5.300000
5.759339 1.449236 -1.425005 0.270131 -0.533287 5.300000
5.619099 1.407808 -1.499996 0.303963 -0.498533 5.300000
5.473180 1.359352 -1.574998 0.336710 -0.463093 5.300000
5.321868 1.303660 -1.650000 0.368173 -0.427562 5.300000
5.165378 1.240526 -1.725002 0.398202 -0.392111 5.300000
5.003930 1.169850 -1.800004 0.426643 -0.356811 5.300000
4.837705 1.091534 -1.875000 0.453340 -0.321653 5.300000
4.666849 1.005602 -1.950015 0.478146 -0.286596 5.300000
4.491940 0.912365 -2.000000 0.500739 -0.248800 5.300000
4.317368 0.814552 -2.000000 0.520049 -0.206273 5.300000
4.144637 0.713733 -2.000000 0.536024 -0.168094 5.300000
3.973379 0.610427 -2.000000 0.549027 -0.133142 5.300000
3.803337 0.505147 -2.000000 0.559301 -0.100531 5.300000
3.634253 0.398330 -2.000000 0.567052 -0.069614 5.300000
3.465857 0.290424 -2.000000 0.572374 -0.039825 5.300000
3.297928 0.181804 -2.000000 0.575486 -0.011143 5.300000
3.130152 0.072874 -1.999599 0.575948 0.008657 5.300000
2.963319 -0.035193 -1.960201 0.572455 0.088958 5.300000
2.801409 -0.138439 -1.882362 0.561766 0.190300 5.300000
2.644466 -0.235417 -1.807366 0.543805 0.290298 5.300000
2.491948 -0.325185 -1.732369 0.518944 0.390295 5.300000
2.343526 -0.407007 -1.657367 0.487258 0.490298 5.300000
2.199028 -0.480162 -1.582206 0.448652 0.593125 5.300000
2.058168 -0.544430 -1.510746 0.407254 0.593400 5.300000
1.921784 -0.600097 -1.435747 0.367823 0.593400 5.300000
1.790398 -0.647925 -1.360748 0.330396 0.593400 5.300000
1.664505 -0.688630 -1.285750 0.294982 0.593400 5.300000
1.544479 -0.722915 -1.210740 0.261571 0.593400 5.300000
1.430697 -0.751468 -1.135741 0.230169 0.593400 5.300000
1.323407 -0.774952 -1.060742 0.200777 0.593400 5.300000
1.222874 -0.793982 -0.985743 0.173387 0.593400 5.300000
1.129276 -0.809151 -0.910745 0.148005 0.593400 5.300000
1.042762 -0.821020 -0.835746 0.124631 0.593400 5.300000
0.963463 -0.830092 -0.760747 0.103265 0.593400 5.300000
0.891454 -0.836851 -0.685748 0.083912 0.593400 5.300000
0.826812 -0.841728 -0.610749 0.066558 0.593400 5.300000
0.769581 -0.845097 -0.535750 0.051215 0.593400 5.300000
0.719807 -0.847319 -0.460751 0.037875 0.593400 5.300000
0.677505 -0.848682 -0.385741 0.026552 0.593400 5.300000
0.642699 -0.849444 -0.310743 0.017236 0.593400 5.300000
0.615374 -0.849815 -0.235744 0.009921 0.593400 5.300000
0.595549 -0.849958 -0.160745 0.004606 0.593400 5.300000
0.583215 -0.849999 -0.085746 0.001311 0.593400 5.300000
