# Supplementary material for: Automatic Parking Controller with a Twin Artificial Neural Network Architecture
Source: Hindawi journal article supplement (doi:10.1155/2019/4801985), 2019-01-01
Supplement: f1 [file 4801985.f1.zip › data/data_150.txt]

7.200000 1.600000 0.000000 0.000000 0.000000 5.300000
7.196325 1.600000 -0.074999 0.000042 -0.028340 5.300000
7.184974 1.600000 -0.149999 0.000335 -0.065993 5.300000
7.166272 1.599985 -0.224997 0.001087 -0.103466 5.300000
7.139987 1.599941 -0.299998 0.002540 -0.140949 5.300000
7.106265 1.599812 -0.375004 0.004915 -0.178450 5.300000
7.064992 1.599540 -0.449997 0.008452 -0.215920 5.300000
7.016260 1.599013 -0.525003 0.013390 -0.253329 5.300000
6.960008 1.598075 -0.599996 0.019990 -0.290605 5.300000
6.896284 1.596544 -0.675001 0.028511 -0.327645 5.300000
6.825074 1.594137 -0.750000 0.039198 -0.364537 5.300000
6.746403 1.590538 -0.825000 0.052341 -0.398006 5.300000
6.660316 1.585372 -0.899998 0.067974 -0.422962 5.300000
6.566839 1.578158 -0.975000 0.086115 -0.447685 5.300000
6.466070 1.568426 -1.049996 0.106943 -0.472407 5.300000
6.358077 1.555539 -1.124999 0.130689 -0.497122 5.300000
6.243044 1.538870 -1.199994 0.157574 -0.522074 5.300000
6.121123 1.517621 -1.274998 0.187611 -0.536133 5.300000
5.992599 1.491100 -1.350003 0.219370 -0.527933 5.300000
5.857683 1.458701 -1.424996 0.251781 -0.508471 5.300000
5.716667 1.419950 -1.500001 0.284151 -0.482926 5.300000
5.569806 1.374481 -1.574996 0.316002 -0.454197 5.300000
5.417349 1.321960 -1.649999 0.347028 -0.423789 5.300000
5.259566 1.262174 -1.724997 0.376969 -0.392565 5.300000
5.096654 1.194906 -1.800000 0.405642 -0.360981 5.300000
4.928843 1.120082 -1.874995 0.432868 -0.329276 5.300000
4.756274 1.037575 -1.953231 0.458514 -0.297953 5.300000
4.579523 0.947659 -1.992014 0.482231 -0.262955 5.300000
4.403381 0.853057 -2.000000 0.502861 -0.223149 5.300000
4.229023 0.755084 -2.000000 0.520372 -0.187636 5.300000
4.056257 0.654331 -2.000000 0.535119 -0.155496 5.300000
3.884862 0.551255 -2.000000 0.547375 -0.125887 5.300000
3.714624 0.446292 -2.000000 0.557312 -0.098179 5.300000
3.545322 0.339814 -2.000000 0.565110 -0.071932 5.300000
3.376747 0.232200 -2.000000 0.570845 -0.046718 5.300000
3.208686 0.123774 -2.000000 0.574866 -0.024001 5.300000
3.040923 0.014983 -1.994377 0.575009 0.043189 5.300000
2.876518 -0.090849 -1.917466 0.567710 0.143503 5.300000
2.717345 -0.190876 -1.842466 0.553065 0.243505 5.300000
2.562800 -0.284116 -1.767461 0.531445 0.343502 5.300000
2.412490 -0.369768 -1.692467 0.502927 0.443500 5.300000
2.266179 -0.447013 -1.617243 0.467572 0.547375 5.300000
2.123572 -0.515472 -1.546100 0.426397 0.593400 5.300000
1.985019 -0.575063 -1.470847 0.386029 0.593400 5.300000
1.851233 -0.626467 -1.395848 0.347663 0.593400 5.300000
1.722716 -0.670415 -1.320849 0.311306 0.593400 5.300000
1.599892 -0.707620 -1.245841 0.276959 0.593400 5.300000
1.483152 -0.738778 -1.170841 0.244614 0.593400 5.300000
1.372790 -0.764552 -1.095842 0.214282 0.593400 5.300000
1.269074 -0.785594 -1.020843 0.185955 0.593400 5.300000
1.172203 -0.802498 -0.945844 0.159637 0.593400 5.300000
1.082360 -0.815845 -0.870845 0.135319 0.593400 5.300000
0.999669 -0.826169 -0.795846 0.113013 0.593400 5.300000
0.924236 -0.833954 -0.720847 0.092716 0.593400 5.300000
0.856145 -0.839657 -0.645848 0.074428 0.593400 5.300000
0.795444 -0.843683 -0.570849 0.058147 0.593400 5.300000
0.742181 -0.846404 -0.495850 0.043869 0.593400 5.300000
0.696375 -0.848135 -0.420851 0.031600 0.593400 5.300000
0.658051 -0.849153 -0.345843 0.021340 0.593400 5.300000
0.627223 -0.849679 -0.270844 0.013092 0.593400 5.300000
0.603890 -0.849912 -0.195845 0.006843 0.593400 5.300000
0.588058 -0.849985 -0.120846 0.002609 0.593400 5.300000
