# Supplementary material for: Automatic Parking Controller with a Twin Artificial Neural Network Architecture
Source: Hindawi journal article supplement (doi:10.1155/2019/4801985), 2019-01-01
Supplement: f1 [file 4801985.f1.zip › data/data_151.txt]

7.300000 1.600000 0.000000 0.000000 0.000000 5.300000
7.296333 1.600000 -0.074998 0.000040 -0.026300 5.300000
7.284979 1.600000 -0.149997 0.000325 -0.062396 5.300000
7.266269 1.599986 -0.224998 0.001050 -0.098262 5.300000
7.239990 1.599937 -0.300004 0.002440 -0.134076 5.300000
7.206265 1.599823 -0.375002 0.004711 -0.169806 5.300000
7.164993 1.599559 -0.450000 0.008096 -0.205395 5.300000
7.116259 1.599057 -0.524999 0.012818 -0.240773 5.300000
7.060015 1.598155 -0.599997 0.019102 -0.275812 5.300000
6.996270 1.596693 -0.674995 0.027188 -0.310340 5.300000
6.925073 1.594404 -0.750005 0.037306 -0.343663 5.300000
6.846387 1.590988 -0.825002 0.049616 -0.369679 5.300000
6.760286 1.586096 -0.900001 0.064105 -0.394350 5.300000
6.666773 1.579316 -0.974999 0.080943 -0.419068 5.300000
6.565948 1.570162 -1.049997 0.100345 -0.443786 5.300000
6.457870 1.558086 -1.124996 0.122524 -0.468580 5.300000
6.342677 1.542447 -1.199994 0.147659 -0.492945 5.300000
6.220545 1.522561 -1.275003 0.175290 -0.498401 5.300000
6.091655 1.497776 -1.350001 0.204605 -0.494926 5.300000
5.956257 1.467524 -1.424999 0.234927 -0.482748 5.300000
5.814570 1.431275 -1.499998 0.265697 -0.464260 5.300000
5.666869 1.388617 -1.574996 0.296415 -0.441647 5.300000
5.513393 1.339158 -1.649994 0.326709 -0.416454 5.300000
5.354406 1.282608 -1.725002 0.356298 -0.389727 5.300000
5.190145 1.218752 -1.800001 0.384944 -0.362180 5.300000
5.020826 1.147370 -1.875000 0.412472 -0.334241 5.300000
4.846641 1.068381 -1.950984 0.438729 -0.306250 5.300000
4.668287 0.981934 -1.998826 0.463373 -0.274900 5.300000
4.490311 0.890498 -2.000000 0.485221 -0.238139 5.300000
4.314314 0.795508 -2.000000 0.504139 -0.205528 5.300000
4.140020 0.697426 -2.000000 0.520517 -0.176331 5.300000
3.967233 0.596715 -2.000000 0.534628 -0.149781 5.300000
3.795779 0.493743 -2.000000 0.546680 -0.125326 5.300000
3.625476 0.388879 -2.000000 0.556831 -0.102533 5.300000
3.456148 0.282443 -2.000000 0.565214 -0.081018 5.300000
3.287631 0.174735 -2.000000 0.571937 -0.060873 5.300000
3.119617 0.066030 -1.999812 0.575213 -0.007822 5.300000
2.953082 -0.041789 -1.953157 0.571990 0.096508 5.300000
2.791528 -0.144656 -1.877711 0.560860 0.196510 5.300000
2.634873 -0.241215 -1.802705 0.542451 0.296512 5.300000
2.482611 -0.330503 -1.727704 0.517193 0.396513 5.300000
2.334439 -0.411813 -1.652706 0.485059 0.496507 5.300000
2.190160 -0.484436 -1.577915 0.446098 0.593400 5.300000
2.049562 -0.548129 -1.506089 0.404747 0.593400 5.300000
1.913474 -0.603288 -1.431090 0.365442 0.593400 5.300000
1.782415 -0.650653 -1.356091 0.328138 0.593400 5.300000
1.656875 -0.690940 -1.281092 0.292848 0.593400 5.300000
1.537228 -0.724848 -1.206083 0.259562 0.593400 5.300000
1.423843 -0.753067 -1.131084 0.228286 0.593400 5.300000
1.316965 -0.776258 -1.056085 0.199019 0.593400 5.300000
1.216855 -0.795030 -0.981086 0.171753 0.593400 5.300000
1.123697 -0.809978 -0.906087 0.146496 0.593400 5.300000
1.037626 -0.821661 -0.831088 0.123248 0.593400 5.300000
0.958778 -0.830575 -0.756089 0.102006 0.593400 5.300000
0.887226 -0.837205 -0.681090 0.082776 0.593400 5.300000
0.823043 -0.841977 -0.606091 0.065548 0.593400 5.300000
0.766273 -0.845264 -0.531092 0.050330 0.593400 5.300000
0.716961 -0.847426 -0.456094 0.037113 0.593400 5.300000
0.675124 -0.848744 -0.381084 0.025916 0.593400 5.300000
0.640782 -0.849478 -0.306086 0.016723 0.593400 5.300000
0.613927 -0.849829 -0.231087 0.009532 0.593400 5.300000
0.594570 -0.849962 -0.156088 0.004345 0.593400 5.300000
0.582700 -0.850000 -0.081089 0.001174 0.593400 5.300000
