# Supplementary material for: Automatic Parking Controller with a Twin Artificial Neural Network Architecture
Source: Hindawi journal article supplement (doi:10.1155/2019/4801985), 2019-01-01
Supplement: f1 [file 4801985.f1.zip › data/data_152.txt]

6.800000 1.700000 0.000000 0.000000 0.000000 5.300000
6.796300 1.700000 -0.074996 0.000060 -0.043711 5.300000
6.784998 1.700000 -0.150003 0.000434 -0.093747 5.300000
6.766256 1.699982 -0.224999 0.001417 -0.144462 5.300000
6.740005 1.699919 -0.299996 0.003341 -0.196405 5.300000
6.706255 1.699757 -0.375003 0.006552 -0.250197 5.300000
6.665003 1.699390 -0.449999 0.011420 -0.306912 5.300000
6.616257 1.698664 -0.525000 0.018423 -0.368467 5.300000
6.560022 1.697368 -0.600001 0.028155 -0.439523 5.300000
6.496310 1.695160 -0.674997 0.041617 -0.525466 5.300000
6.425156 1.691572 -0.750004 0.059337 -0.558632 5.300000
6.346597 1.686093 -0.825001 0.080074 -0.574662 5.300000
6.260711 1.678214 -0.899997 0.102971 -0.574089 5.300000
6.167579 1.667417 -0.975004 0.127843 -0.574278 5.300000
6.067350 1.653162 -1.050000 0.154717 -0.575373 5.300000
5.960144 1.634853 -1.125002 0.183569 -0.574971 5.300000
5.846196 1.611882 -1.200003 0.214453 -0.574726 5.300000
5.725731 1.583559 -1.274999 0.247281 -0.574660 5.300000
5.599064 1.549232 -1.350006 0.282100 -0.573756 5.300000
5.466535 1.508159 -1.425002 0.318917 -0.574000 5.300000
5.328584 1.459629 -1.499999 0.357753 -0.576127 5.300000
5.185706 1.402869 -1.575005 0.398545 -0.575653 5.300000
5.038473 1.337144 -1.650001 0.441127 -0.568269 5.300000
4.887396 1.261979 -1.724997 0.480731 -0.487215 5.300000
4.732600 1.177733 -1.800005 0.515005 -0.409476 5.300000
4.574083 1.084806 -1.875001 0.544206 -0.338562 5.300000
4.411753 0.983683 -1.950513 0.569115 -0.278030 5.300000
4.245935 0.875055 -1.999006 0.589787 -0.216917 5.300000
4.080586 0.762415 -2.000000 0.605409 -0.154411 5.300000
3.916805 0.647630 -2.000000 0.616214 -0.097156 5.300000
3.753999 0.531467 -2.000000 0.622521 -0.043021 5.300000
3.591686 0.414607 -2.000000 0.624385 0.002333 5.300000
3.429331 0.297826 -2.000000 0.621826 0.051637 5.300000
3.266395 0.181834 -2.000000 0.614687 0.106599 5.300000
3.102373 0.067376 -1.999348 0.603088 0.164999 5.300000
2.938218 -0.043835 -1.951127 0.586873 0.219893 5.300000
2.777999 -0.148178 -1.874338 0.566937 0.273016 5.300000
2.621942 -0.245077 -1.799342 0.543569 0.324721 5.300000
2.469991 -0.334225 -1.724344 0.516677 0.405384 5.300000
2.322047 -0.415250 -1.649339 0.483848 0.506008 5.300000
2.177924 -0.487511 -1.575467 0.444227 0.593400 5.300000
2.037530 -0.550796 -1.502700 0.402930 0.593400 5.300000
1.901650 -0.605592 -1.427698 0.363712 0.593400 5.300000
1.770831 -0.652617 -1.352706 0.326503 0.593400 5.300000
1.645541 -0.692594 -1.277703 0.291304 0.593400 5.300000
1.526175 -0.726240 -1.202700 0.258104 0.593400 5.300000
1.413071 -0.754215 -1.127697 0.226922 0.593400 5.300000
1.306503 -0.777192 -1.052704 0.197744 0.593400 5.300000
1.206704 -0.795782 -0.977703 0.170565 0.593400 5.300000
1.113855 -0.810576 -0.902700 0.145404 0.593400 5.300000
1.028111 -0.822121 -0.827700 0.122246 0.593400 5.300000
0.949582 -0.830922 -0.752700 0.101097 0.593400 5.300000
0.878364 -0.837462 -0.677703 0.081957 0.593400 5.300000
0.814521 -0.842152 -0.602700 0.064816 0.593400 5.300000
0.758089 -0.845387 -0.527697 0.049685 0.593400 5.300000
0.709116 -0.847504 -0.452706 0.036564 0.593400 5.300000
0.667611 -0.848790 -0.377703 0.025452 0.593400 5.300000
0.633598 -0.849500 -0.302700 0.016351 0.593400 5.300000
0.607090 -0.849840 -0.227697 0.009248 0.593400 5.300000
0.588064 -0.849965 -0.152703 0.004157 0.593400 5.300000
0.576550 -0.850000 -0.077702 0.001075 0.593400 5.300000
