# Supplementary material for: Automatic Parking Controller with a Twin Artificial Neural Network Architecture
Source: Hindawi journal article supplement (doi:10.1155/2019/4801985), 2019-01-01
Supplement: f1 [file 4801985.f1.zip › data/data_153.txt]

6.900000 1.700000 0.000000 0.000000 0.000000 5.300000
6.896310 1.700000 -0.075001 0.000058 -0.039382 5.300000
6.884993 1.700000 -0.150001 0.000401 -0.085861 5.300000
6.866259 1.699983 -0.224996 0.001325 -0.132702 5.300000
6.839999 1.699923 -0.300003 0.003117 -0.180276 5.300000
6.806254 1.699770 -0.374997 0.006067 -0.228914 5.300000
6.764993 1.699432 -0.450004 0.010536 -0.279129 5.300000
6.716262 1.698771 -0.524999 0.016885 -0.331721 5.300000
6.660013 1.697578 -0.599995 0.025562 -0.388266 5.300000
6.596305 1.695597 -0.675001 0.037134 -0.453770 5.300000
6.525115 1.692415 -0.749997 0.052474 -0.521165 5.300000
6.446530 1.687551 -0.825002 0.071704 -0.547080 5.300000
6.360570 1.680413 -0.899998 0.094014 -0.573478 5.300000
6.267357 1.670462 -0.974999 0.118871 -0.574316 5.300000
6.166986 1.657102 -1.049998 0.145738 -0.574487 5.300000
6.059643 1.639769 -1.125001 0.174586 -0.574122 5.300000
5.945485 1.617802 -1.200000 0.205429 -0.573767 5.300000
5.824777 1.590589 -1.274994 0.238272 -0.574656 5.300000
5.697792 1.557387 -1.350001 0.273108 -0.575368 5.300000
5.564907 1.517526 -1.424995 0.309893 -0.573226 5.300000
5.426522 1.470230 -1.500002 0.348675 -0.571836 5.300000
5.283144 1.414782 -1.574997 0.389503 -0.576331 5.300000
5.135265 1.350488 -1.649995 0.429572 -0.517216 5.300000
4.983171 1.277431 -1.724999 0.464911 -0.440248 5.300000
4.826912 1.195888 -1.799996 0.496045 -0.380016 5.300000
4.666578 1.106156 -1.875000 0.523675 -0.325554 5.300000
4.502164 1.008434 -1.951488 0.547945 -0.273691 5.300000
4.334045 0.903346 -1.999330 0.568602 -0.220143 5.300000
4.166416 0.794194 -2.000000 0.584813 -0.163764 5.300000
4.000349 0.682744 -2.000000 0.596622 -0.112386 5.300000
3.835385 0.569660 -2.000000 0.604492 -0.064066 5.300000
3.671090 0.455609 -2.000000 0.608529 -0.018805 5.300000
3.507058 0.341190 -2.000000 0.608673 0.017097 5.300000
3.342780 0.227115 -2.000000 0.604665 0.061709 5.300000
3.177842 0.113996 -2.000000 0.596856 0.110617 5.300000
3.011932 0.002592 -1.984732 0.585127 0.158864 5.300000
2.848980 -0.103679 -1.907575 0.569990 0.200887 5.300000
2.690675 -0.203222 -1.832573 0.551980 0.260923 5.300000
2.536825 -0.295706 -1.757574 0.529057 0.361703 5.300000
2.387115 -0.380387 -1.682573 0.499252 0.461700 5.300000
2.241365 -0.456536 -1.607083 0.462483 0.570548 5.300000
2.099209 -0.523836 -1.535947 0.420951 0.593400 5.300000
1.961261 -0.582315 -1.460938 0.380842 0.593400 5.300000
1.828142 -0.632694 -1.385935 0.342742 0.593400 5.300000
1.700349 -0.675703 -1.310932 0.306653 0.593400 5.300000
1.578311 -0.712075 -1.235938 0.272571 0.593400 5.300000
1.462401 -0.742473 -1.160937 0.240493 0.593400 5.300000
1.352905 -0.767595 -1.085935 0.210422 0.593400 5.300000
1.250077 -0.788051 -1.010932 0.182362 0.593400 5.300000
1.154123 -0.804452 -0.935933 0.156304 0.593400 5.300000
1.065218 -0.817371 -0.860938 0.132259 0.593400 5.300000
0.983479 -0.827325 -0.785935 0.110217 0.593400 5.300000
0.909019 -0.834813 -0.710932 0.090184 0.593400 5.300000
0.841893 -0.840275 -0.635930 0.072162 0.593400 5.300000
0.782173 -0.844116 -0.560937 0.056141 0.593400 5.300000
0.729891 -0.846683 -0.485934 0.042130 0.593400 5.300000
0.685080 -0.848305 -0.410931 0.030128 0.593400 5.300000
0.647749 -0.849245 -0.335928 0.020136 0.593400 5.300000
0.617914 -0.849726 -0.260936 0.012153 0.593400 5.300000
0.595568 -0.849929 -0.185934 0.006170 0.593400 5.300000
0.580714 -0.849988 -0.110931 0.002197 0.593400 5.300000
