# Supplementary material for: Automatic Parking Controller with a Twin Artificial Neural Network Architecture
Source: Hindawi journal article supplement (doi:10.1155/2019/4801985), 2019-01-01
Supplement: f1 [file 4801985.f1.zip › data/data_154.txt]

7.000000 1.700000 0.000000 0.000000 0.000000 5.300000
6.996316 1.700000 -0.075001 0.000053 -0.035760 5.300000
6.984988 1.700000 -0.150003 0.000379 -0.079307 5.300000
6.966263 1.699984 -0.225004 0.001244 -0.122994 5.300000
6.939993 1.699927 -0.299996 0.002923 -0.167112 5.300000
6.906258 1.699785 -0.374996 0.005678 -0.211815 5.300000
6.864990 1.699473 -0.449998 0.009832 -0.257341 5.300000
6.816261 1.698850 -0.524999 0.015687 -0.304032 5.300000
6.760007 1.697753 -0.600000 0.023610 -0.352435 5.300000
6.696300 1.695922 -0.675002 0.033997 -0.403610 5.300000
6.625102 1.693036 -0.750003 0.047396 -0.461089 5.300000
6.546480 1.688655 -0.825003 0.064460 -0.512569 5.300000
6.460463 1.682218 -0.899995 0.085103 -0.536521 5.300000
6.367166 1.673160 -0.974997 0.108780 -0.561296 5.300000
6.266662 1.660826 -1.049998 0.135488 -0.574201 5.300000
6.159142 1.644592 -1.124999 0.164349 -0.573781 5.300000
6.044769 1.623801 -1.200001 0.195188 -0.573926 5.300000
5.923779 1.597819 -1.275002 0.228020 -0.574708 5.300000
5.796470 1.565933 -1.350004 0.262842 -0.574170 5.300000
5.663179 1.527421 -1.424995 0.299624 -0.572530 5.300000
5.524325 1.481560 -1.499996 0.338544 -0.575084 5.300000
5.380347 1.427616 -1.574997 0.377694 -0.533520 5.300000
5.231596 1.365418 -1.649998 0.413457 -0.469064 5.300000
5.078222 1.295046 -1.725000 0.445963 -0.415678 5.300000
4.920389 1.216628 -1.800001 0.475652 -0.366936 5.300000
4.758225 1.130222 -1.875002 0.502622 -0.320484 5.300000
4.591768 1.036021 -1.951884 0.526803 -0.275204 5.300000
4.421479 0.934457 -1.994493 0.547936 -0.227374 5.300000
4.251690 0.828748 -2.000000 0.565026 -0.176654 5.300000
4.083518 0.720493 -2.000000 0.578168 -0.130301 5.300000
3.916577 0.610349 -2.000000 0.587683 -0.087027 5.300000
3.750512 0.498892 -2.000000 0.593864 -0.045579 5.300000
3.584954 0.386697 -2.000000 0.596763 -0.008062 5.300000
3.419526 0.274292 -2.000000 0.596155 0.019166 5.300000
3.253817 0.162310 -2.000000 0.591857 0.059637 5.300000
3.087328 0.051225 -1.996123 0.584342 0.101627 5.300000
2.921962 -0.056950 -1.941318 0.573683 0.137375 5.300000
2.761407 -0.159260 -1.866347 0.559994 0.215078 5.300000
2.605567 -0.254985 -1.791351 0.540232 0.316672 5.300000
2.454029 -0.343261 -1.716350 0.513529 0.416668 5.300000
2.306504 -0.423377 -1.641348 0.479941 0.516666 5.300000
2.162763 -0.494679 -1.568692 0.439704 0.593400 5.300000
2.022816 -0.557029 -1.494706 0.398654 0.593400 5.300000
1.887456 -0.610961 -1.419703 0.359650 0.593400 5.300000
1.757204 -0.657200 -1.344710 0.322655 0.593400 5.300000
1.632526 -0.696470 -1.269709 0.287670 0.593400 5.300000
1.513814 -0.729480 -1.194706 0.254685 0.593400 5.300000
1.401393 -0.756893 -1.119704 0.223713 0.593400 5.300000
1.295536 -0.779374 -1.044706 0.194749 0.593400 5.300000
1.196471 -0.797529 -0.969709 0.167788 0.593400 5.300000
1.104376 -0.811952 -0.894706 0.142840 0.593400 5.300000
1.019396 -0.823183 -0.819704 0.119894 0.593400 5.300000
0.941642 -0.831718 -0.744702 0.098959 0.593400 5.300000
0.871202 -0.838043 -0.669709 0.080033 0.593400 5.300000
0.808151 -0.842561 -0.594706 0.063107 0.593400 5.300000
0.752514 -0.845663 -0.519703 0.048191 0.593400 5.300000
0.704338 -0.847676 -0.444709 0.035284 0.593400 5.300000
0.663629 -0.848888 -0.369708 0.024387 0.593400 5.300000
0.630413 -0.849548 -0.294706 0.015499 0.593400 5.300000
0.604702 -0.849861 -0.219703 0.008610 0.593400 5.300000
0.586475 -0.849972 -0.144705 0.003732 0.593400 5.300000
