# Supplementary material for: Automatic Parking Controller with a Twin Artificial Neural Network Architecture
Source: Hindawi journal article supplement (doi:10.1155/2019/4801985), 2019-01-01
Supplement: f1 [file 4801985.f1.zip › data/data_155.txt]

7.100000 1.700000 0.000000 0.000000 0.000000 5.300000
7.096320 1.700000 -0.075002 0.000051 -0.032810 5.300000
7.084982 1.700000 -0.150005 0.000368 -0.074019 5.300000
7.066270 1.699984 -0.224996 0.001187 -0.115237 5.300000
7.039992 1.699931 -0.299999 0.002774 -0.156673 5.300000
7.006258 1.699796 -0.375001 0.005375 -0.198415 5.300000
6.964991 1.699501 -0.450003 0.009282 -0.240548 5.300000
6.916261 1.698914 -0.525004 0.014757 -0.283210 5.300000
6.860009 1.697884 -0.599997 0.022136 -0.326557 5.300000
6.796288 1.696177 -0.675000 0.031722 -0.370905 5.300000
6.725084 1.693489 -0.750002 0.043916 -0.416705 5.300000
6.646443 1.689445 -0.825004 0.059152 -0.465692 5.300000
6.560398 1.683558 -0.900002 0.077889 -0.502931 5.300000
6.467015 1.675245 -0.974998 0.099853 -0.527058 5.300000
6.366410 1.663915 -1.050001 0.124908 -0.552040 5.300000
6.258700 1.648848 -1.125003 0.153237 -0.573716 5.300000
6.144114 1.629349 -1.200005 0.184053 -0.573524 5.300000
6.022839 1.604699 -1.274999 0.216874 -0.573096 5.300000
5.895186 1.574249 -1.349999 0.251704 -0.574872 5.300000
5.761465 1.537213 -1.425001 0.288580 -0.575077 5.300000
5.622100 1.492942 -1.500004 0.326224 -0.544938 5.300000
5.477381 1.441028 -1.575007 0.361772 -0.491313 5.300000
5.327562 1.381411 -1.649998 0.394976 -0.445096 5.300000
5.172867 1.314024 -1.725000 0.426053 -0.402051 5.300000
5.013464 1.238814 -1.800002 0.455014 -0.360627 5.300000
4.849537 1.155820 -1.875005 0.481751 -0.320088 5.300000
4.681180 1.065076 -1.950598 0.506188 -0.280138 5.300000
4.508926 0.967058 -2.000000 0.527965 -0.237562 5.300000
4.337046 0.864622 -2.000000 0.546121 -0.190751 5.300000
4.166926 0.759468 -2.000000 0.560613 -0.148461 5.300000
3.998173 0.652121 -2.000000 0.571826 -0.109355 5.300000
3.830458 0.543160 -2.000000 0.579979 -0.072408 5.300000
3.663490 0.433079 -2.000000 0.585277 -0.036693 5.300000
3.496938 0.322338 -2.000000 0.587810 -0.004456 5.300000
3.330497 0.211449 -2.000000 0.587149 0.015313 5.300000
3.163805 0.100936 -2.000000 0.583232 0.050366 5.300000
2.996951 -0.008442 -1.974208 0.576684 0.086966 5.300000
2.833933 -0.113442 -1.900594 0.566703 0.170761 5.300000
2.675996 -0.212246 -1.825507 0.550154 0.271122 5.300000
2.522551 -0.304032 -1.750513 0.526529 0.371123 5.300000
2.373221 -0.387933 -1.675513 0.496106 0.471120 5.300000
2.227834 -0.463246 -1.599941 0.458648 0.581294 5.300000
2.086025 -0.529709 -1.528874 0.417087 0.593400 5.300000
1.948509 -0.587394 -1.453873 0.377167 0.593400 5.300000
1.815869 -0.637050 -1.378871 0.339257 0.593400 5.300000
1.688604 -0.679402 -1.303868 0.303357 0.593400 5.300000
1.567126 -0.715183 -1.228870 0.269461 0.593400 5.300000
1.451807 -0.745054 -1.153869 0.237576 0.593400 5.300000
1.342932 -0.769710 -1.078871 0.207695 0.593400 5.300000
1.240745 -0.789759 -1.003868 0.179822 0.593400 5.300000
1.145446 -0.805809 -0.928866 0.153951 0.593400 5.300000
1.057210 -0.818425 -0.853873 0.130099 0.593400 5.300000
0.976152 -0.828130 -0.778871 0.108246 0.593400 5.300000
0.902382 -0.835408 -0.703868 0.088403 0.593400 5.300000
0.835953 -0.840699 -0.628864 0.070568 0.593400 5.300000
0.776931 -0.844406 -0.553872 0.054736 0.593400 5.300000
0.725350 -0.846870 -0.478870 0.040913 0.593400 5.300000
0.681244 -0.848421 -0.403867 0.029101 0.593400 5.300000
0.644616 -0.849308 -0.328864 0.019298 0.593400 5.300000
0.615489 -0.849754 -0.253869 0.011501 0.593400 5.300000
0.593852 -0.849938 -0.178870 0.005710 0.593400 5.300000
0.579712 -0.849991 -0.103867 0.001928 0.593400 5.300000
