# Supplementary material for: Automatic Parking Controller with a Twin Artificial Neural Network Architecture
Source: Hindawi journal article supplement (doi:10.1155/2019/4801985), 2019-01-01
Supplement: f1 [file 4801985.f1.zip › data/data_156.txt]

7.200000 1.700000 0.000000 0.000000 0.000000 5.300000
7.196326 1.700000 -0.074999 0.000050 -0.030533 5.300000
7.184976 1.700000 -0.150000 0.000348 -0.069973 5.300000
7.166268 1.699985 -0.224998 0.001137 -0.109320 5.300000
7.139990 1.699935 -0.300001 0.002658 -0.148777 5.300000
7.106265 1.699805 -0.374997 0.005145 -0.188384 5.300000
7.064992 1.699518 -0.450001 0.008867 -0.228136 5.300000
7.016260 1.698962 -0.524996 0.014076 -0.268078 5.300000
6.960014 1.697979 -0.600002 0.021063 -0.308237 5.300000
6.896279 1.696353 -0.674996 0.030102 -0.348624 5.300000
6.825088 1.693815 -0.750002 0.041510 -0.389274 5.300000
6.746419 1.689998 -0.824996 0.055633 -0.430684 5.300000
6.660352 1.684488 -0.900002 0.072798 -0.466281 5.300000
6.566919 1.676727 -0.974996 0.092970 -0.490498 5.300000
6.466234 1.666188 -1.050003 0.116033 -0.515225 5.300000
6.358379 1.652193 -1.124996 0.142250 -0.539939 5.300000
6.243565 1.634039 -1.200002 0.171855 -0.564557 5.300000
6.122008 1.610894 -1.274997 0.204554 -0.573492 5.300000
5.993977 1.581998 -1.350002 0.239442 -0.577104 5.300000
5.859821 1.546666 -1.424997 0.275232 -0.548605 5.300000
5.719804 1.504431 -1.500001 0.310030 -0.508801 5.300000
5.574212 1.455055 -1.574998 0.343459 -0.470562 5.300000
5.423279 1.398280 -1.650000 0.375439 -0.433095 5.300000
5.267276 1.333992 -1.724998 0.405859 -0.396162 5.300000
5.106384 1.262049 -1.799999 0.434579 -0.359618 5.300000
4.940795 1.182403 -1.874999 0.461471 -0.323338 5.300000
4.770620 1.095062 -1.953725 0.486394 -0.287489 5.300000
4.596386 1.000320 -1.988345 0.509018 -0.248067 5.300000
4.422792 0.901183 -2.000000 0.528217 -0.204859 5.300000
4.250879 0.798961 -2.000000 0.544048 -0.165725 5.300000
4.080448 0.694311 -2.000000 0.556814 -0.129807 5.300000
3.911218 0.587716 -2.000000 0.566806 -0.096232 5.300000
3.742914 0.479673 -2.000000 0.574163 -0.064305 5.300000
3.575275 0.370602 -2.000000 0.579041 -0.033347 5.300000
3.408041 0.260909 -2.000000 0.581602 -0.004675 5.300000
3.240922 0.151038 -2.000000 0.581310 0.009312 5.300000
3.073532 0.041396 -1.999980 0.578098 0.033769 5.300000
2.908207 -0.065875 -1.935046 0.572025 0.125094 5.300000
2.748045 -0.167635 -1.860005 0.558637 0.225125 5.300000
2.592584 -0.262734 -1.784999 0.538262 0.325135 5.300000
2.441403 -0.350369 -1.710005 0.510939 0.425133 5.300000
2.294195 -0.429750 -1.634998 0.476800 0.525152 5.300000
2.150763 -0.500290 -1.563142 0.436125 0.593400 5.300000
2.011175 -0.561908 -1.488362 0.395276 0.593400 5.300000
1.876231 -0.615161 -1.413359 0.356442 0.593400 5.300000
1.746434 -0.660782 -1.338363 0.319618 0.593400 5.300000
1.622247 -0.699496 -1.263365 0.284803 0.593400 5.300000
1.504057 -0.732005 -1.188362 0.251988 0.593400 5.300000
1.392179 -0.758977 -1.113359 0.221183 0.593400 5.300000
1.286888 -0.781071 -1.038359 0.192388 0.593400 5.300000
1.188405 -0.798887 -0.963365 0.165601 0.593400 5.300000
1.096908 -0.813020 -0.888362 0.140820 0.593400 5.300000
1.012536 -0.824001 -0.813359 0.118045 0.593400 5.300000
0.935401 -0.832332 -0.738356 0.097279 0.593400 5.300000
0.865580 -0.838489 -0.663365 0.078523 0.593400 5.300000
0.803155 -0.842874 -0.588362 0.061767 0.593400 5.300000
0.748149 -0.845873 -0.513359 0.047021 0.593400 5.300000
0.700602 -0.847804 -0.438362 0.034284 0.593400 5.300000
0.660530 -0.848962 -0.363362 0.023557 0.593400 5.300000
0.627950 -0.849585 -0.288361 0.014840 0.593400 5.300000
0.602871 -0.849876 -0.213359 0.008121 0.593400 5.300000
0.585275 -0.849976 -0.138358 0.003412 0.593400 5.300000
