# Supplementary material for: Automatic Parking Controller with a Twin Artificial Neural Network Architecture
Source: Hindawi journal article supplement (doi:10.1155/2019/4801985), 2019-01-01
Supplement: f1 [file 4801985.f1.zip › data/data_157.txt]

7.300000 1.700000 0.000000 0.000000 0.000000 5.300000
7.296333 1.700000 -0.074996 0.000048 -0.028748 5.300000
7.284978 1.700000 -0.150002 0.000337 -0.066827 5.300000
7.266277 1.699986 -0.225000 0.001100 -0.104759 5.300000
7.239988 1.699939 -0.299996 0.002573 -0.142735 5.300000
7.206265 1.699815 -0.375004 0.004969 -0.180746 5.300000
7.165000 1.699534 -0.450000 0.008557 -0.218796 5.300000
7.116256 1.698997 -0.524996 0.013569 -0.256845 5.300000
7.060015 1.698050 -0.600004 0.020261 -0.294848 5.300000
6.996278 1.696492 -0.675000 0.028915 -0.332740 5.300000
6.925083 1.694053 -0.749998 0.039778 -0.370449 5.300000
6.846402 1.690402 -0.825003 0.053169 -0.407007 5.300000
6.760319 1.685140 -0.899999 0.069231 -0.433310 5.300000
6.666858 1.677797 -0.975001 0.087856 -0.458029 5.300000
6.566102 1.667848 -1.050003 0.109228 -0.482748 5.300000
6.458157 1.654701 -1.124999 0.133572 -0.507465 5.300000
6.343158 1.637643 -1.200004 0.161124 -0.532199 5.300000
6.221342 1.615933 -1.275003 0.192034 -0.553004 5.300000
6.092933 1.588751 -1.349998 0.224945 -0.542679 5.300000
5.958233 1.555537 -1.425006 0.258313 -0.519693 5.300000
5.817485 1.515813 -1.500002 0.291415 -0.491213 5.300000
5.670965 1.469229 -1.574999 0.323823 -0.460093 5.300000
5.518947 1.415501 -1.650006 0.355228 -0.427804 5.300000
5.361651 1.354377 -1.725002 0.385441 -0.394972 5.300000
5.199323 1.285749 -1.799999 0.414241 -0.361954 5.300000
5.032164 1.209455 -1.875002 0.441503 -0.328907 5.300000
4.860334 1.125491 -1.949998 0.467047 -0.295915 5.300000
4.684463 1.034131 -2.000000 0.490561 -0.260043 5.300000
4.508941 0.937995 -2.000000 0.510921 -0.218992 5.300000
4.335356 0.838674 -2.000000 0.528048 -0.182327 5.300000
4.163347 0.736622 -2.000000 0.542319 -0.149027 5.300000
3.992676 0.632365 -2.000000 0.553999 -0.118187 5.300000
3.823105 0.526323 -2.000000 0.563284 -0.089203 5.300000
3.654396 0.418902 -2.000000 0.570307 -0.061577 5.300000
3.486334 0.310487 -2.000000 0.575167 -0.034840 5.300000
3.318688 0.201424 -2.000000 0.578027 -0.009234 5.300000
3.151190 0.092067 -1.999973 0.578499 0.006475 5.300000
2.984219 -0.016741 -1.971591 0.575560 0.076765 5.300000
2.821609 -0.121255 -1.894738 0.565741 0.178809 5.300000
2.664039 -0.219568 -1.819742 0.548570 0.278809 5.300000
2.510928 -0.310768 -1.744745 0.524432 0.378810 5.300000
2.361899 -0.394044 -1.669738 0.493475 0.478809 5.300000
2.216808 -0.468678 -1.594228 0.455497 0.587969 5.300000
2.075291 -0.534448 -1.523105 0.413945 0.593400 5.300000
1.938130 -0.591487 -1.448104 0.374181 0.593400 5.300000
1.805887 -0.640556 -1.373104 0.336425 0.593400 5.300000
1.679054 -0.682378 -1.298101 0.300679 0.593400 5.300000
1.558035 -0.717681 -1.223101 0.266935 0.593400 5.300000
1.443201 -0.747128 -1.148100 0.235208 0.593400 5.300000
1.334832 -0.771406 -1.073104 0.205481 0.593400 5.300000
1.233171 -0.791127 -0.998101 0.177761 0.593400 5.300000
1.138410 -0.806893 -0.923098 0.152046 0.593400 5.300000
1.050720 -0.819267 -0.848106 0.128348 0.593400 5.300000
0.970218 -0.828772 -0.773104 0.106651 0.593400 5.300000
0.897011 -0.835882 -0.698101 0.086962 0.593400 5.300000
0.831151 -0.841035 -0.623097 0.069279 0.593400 5.300000
0.772700 -0.844635 -0.548103 0.053602 0.593400 5.300000
0.721694 -0.847017 -0.473103 0.039934 0.593400 5.300000
0.678164 -0.848511 -0.398100 0.028276 0.593400 5.300000
0.642108 -0.849356 -0.323098 0.018627 0.593400 5.300000
0.613557 -0.849776 -0.248099 0.010982 0.593400 5.300000
0.592495 -0.849945 -0.173103 0.005345 0.593400 5.300000
0.578937 -0.849994 -0.098100 0.001719 0.593400 5.300000
