# Supplementary material for: Automatic Parking Controller with a Twin Artificial Neural Network Architecture
Source: Hindawi journal article supplement (doi:10.1155/2019/4801985), 2019-01-01
Supplement: f1 [file 4801985.f1.zip › data/data_158.txt]

6.900000 1.800000 0.000000 0.000000 0.000000 5.300000
6.896311 1.800000 -0.074999 0.000060 -0.043414 5.300000
6.884991 1.800000 -0.149999 0.000434 -0.093283 5.300000
6.866258 1.799983 -0.224998 0.001416 -0.143839 5.300000
6.839995 1.799916 -0.299997 0.003344 -0.195613 5.300000
6.806260 1.799753 -0.374996 0.006528 -0.249242 5.300000
6.764992 1.799392 -0.449996 0.011390 -0.305767 5.300000
6.716263 1.798674 -0.524998 0.018364 -0.367138 5.300000
6.660018 1.797368 -0.600004 0.028067 -0.437642 5.300000
6.596315 1.795170 -0.675003 0.041471 -0.524632 5.300000
6.525144 1.791597 -0.750003 0.059134 -0.554201 5.300000
6.446602 1.786148 -0.825002 0.079740 -0.574160 5.300000
6.360703 1.778281 -0.900001 0.102645 -0.574144 5.300000
6.267582 1.767524 -0.975000 0.127515 -0.574173 5.300000
6.167331 1.753296 -1.050000 0.154376 -0.574178 5.300000
6.060134 1.735035 -1.124999 0.183223 -0.574116 5.300000
5.946167 1.712093 -1.199998 0.214079 -0.574527 5.300000
5.825703 1.683830 -1.274997 0.246902 -0.573653 5.300000
5.699012 1.649534 -1.349997 0.281724 -0.573660 5.300000
5.566481 1.608530 -1.424996 0.318558 -0.575427 5.300000
5.428499 1.560042 -1.499995 0.357355 -0.575072 5.300000
5.285610 1.503347 -1.574994 0.398096 -0.571047 5.300000
5.138347 1.437668 -1.649999 0.440919 -0.571428 5.300000
4.987305 1.362450 -1.725003 0.482018 -0.505558 5.300000
4.832693 1.277865 -1.800002 0.517912 -0.427662 5.300000
4.674511 1.184362 -1.875002 0.548503 -0.351721 5.300000
4.512655 1.082443 -1.953516 0.574531 -0.291179 5.300000
4.347402 0.972770 -1.989363 0.596315 -0.230030 5.300000
4.182992 0.859051 -2.000000 0.613036 -0.167826 5.300000
4.020156 0.742929 -2.000000 0.624957 -0.111191 5.300000
3.858433 0.625254 -2.000000 0.632461 -0.057826 5.300000
3.697375 0.506689 -2.000000 0.635979 -0.008901 5.300000
3.536431 0.387943 -2.000000 0.634788 0.032527 5.300000
3.375109 0.269744 -2.000000 0.629103 0.085068 5.300000
3.212862 0.152791 -2.000000 0.619311 0.140430 5.300000
3.049114 0.037719 -1.991589 0.604888 0.198680 5.300000
2.886503 -0.072551 -1.928840 0.586141 0.251897 5.300000
2.727852 -0.175450 -1.853437 0.563790 0.305417 5.300000
2.573177 -0.270557 -1.778438 0.538051 0.360153 5.300000
2.422437 -0.357658 -1.703439 0.508820 0.437910 5.300000
2.275613 -0.436320 -1.628328 0.473680 0.541020 5.300000
2.132461 -0.506106 -1.556971 0.432416 0.593400 5.300000
1.993266 -0.566953 -1.481719 0.391754 0.593400 5.300000
1.858761 -0.619502 -1.406713 0.353099 0.593400 5.300000
1.729439 -0.664481 -1.331718 0.316454 0.593400 5.300000
1.605774 -0.702620 -1.256720 0.281809 0.593400 5.300000
1.488131 -0.734610 -1.181719 0.249180 0.593400 5.300000
1.376826 -0.761130 -1.106716 0.218555 0.593400 5.300000
1.272129 -0.782815 -1.031720 0.189940 0.593400 5.300000
1.174256 -0.800279 -0.956714 0.163325 0.593400 5.300000
1.083384 -0.814108 -0.881718 0.138720 0.593400 5.300000
0.999649 -0.824833 -0.806715 0.116121 0.593400 5.300000
0.923157 -0.832960 -0.731713 0.095536 0.593400 5.300000
0.853993 -0.838940 -0.656717 0.076952 0.593400 5.300000
0.792223 -0.843195 -0.581720 0.060385 0.593400 5.300000
0.737874 -0.846081 -0.506715 0.045819 0.593400 5.300000
0.690993 -0.847930 -0.431718 0.033251 0.593400 5.300000
0.651590 -0.849037 -0.356716 0.022706 0.593400 5.300000
0.619669 -0.849627 -0.281714 0.014161 0.593400 5.300000
0.595254 -0.849892 -0.206716 0.007627 0.593400 5.300000
0.578330 -0.849980 -0.131711 0.003100 0.593400 5.300000
