# Supplementary material for: Automatic Parking Controller with a Twin Artificial Neural Network Architecture
Source: Hindawi journal article supplement (doi:10.1155/2019/4801985), 2019-01-01
Supplement: f1 [file 4801985.f1.zip › data/data_159.txt]

7.000000 1.800000 0.000000 0.000000 0.000000 5.300000
6.996315 1.800000 -0.075001 0.000055 -0.039333 5.300000
6.984980 1.800000 -0.150003 0.000402 -0.085862 5.300000
6.966269 1.799984 -0.225001 0.001329 -0.132778 5.300000
6.939984 1.799929 -0.299996 0.003119 -0.180448 5.300000
6.906263 1.799773 -0.374997 0.006082 -0.229236 5.300000
6.864990 1.799431 -0.449999 0.010562 -0.279653 5.300000
6.816262 1.798768 -0.525000 0.016926 -0.332596 5.300000
6.760014 1.797577 -0.600002 0.025629 -0.389660 5.300000
6.696305 1.795588 -0.675003 0.037258 -0.455640 5.300000
6.625119 1.792393 -0.749998 0.052763 -0.523049 5.300000
6.546528 1.787496 -0.824996 0.072139 -0.550575 5.300000
6.460573 1.780319 -0.899998 0.094539 -0.571673 5.300000
6.367365 1.770317 -0.974999 0.119398 -0.574099 5.300000
6.267013 1.756907 -1.050000 0.146257 -0.573977 5.300000
6.159661 1.739512 -1.125002 0.175099 -0.573603 5.300000
6.045521 1.717498 -1.200004 0.205945 -0.573990 5.300000
5.924821 1.690205 -1.274996 0.238783 -0.574701 5.300000
5.797869 1.656962 -1.349996 0.273589 -0.573591 5.300000
5.664987 1.617015 -1.424998 0.310375 -0.572380 5.300000
5.526641 1.569669 -1.499999 0.349205 -0.575320 5.300000
5.383267 1.514125 -1.575001 0.390096 -0.577043 5.300000
5.235465 1.449729 -1.650002 0.431128 -0.534885 5.300000
5.083535 1.376287 -1.724997 0.467935 -0.455743 5.300000
4.927588 1.294202 -1.799995 0.500203 -0.392207 5.300000
4.767666 1.203702 -1.874997 0.528819 -0.336679 5.300000
4.603809 1.105078 -1.950181 0.553993 -0.284138 5.300000
4.436427 0.998921 -1.999521 0.575564 -0.230315 5.300000
4.269551 0.888499 -2.000000 0.592634 -0.173909 5.300000
4.104415 0.775680 -2.000000 0.605307 -0.122607 5.300000
3.940484 0.661102 -2.000000 0.614006 -0.074637 5.300000
3.777340 0.545419 -2.000000 0.619022 -0.028597 5.300000
3.614560 0.429217 -2.000000 0.620078 0.005091 5.300000
3.451659 0.313181 -2.000000 0.617157 0.048277 5.300000
3.288212 0.197923 -2.000000 0.610417 0.095421 5.300000
3.123732 0.084073 -1.999035 0.599889 0.145159 5.300000
2.958780 -0.027103 -1.960468 0.585384 0.192154 5.300000
2.797492 -0.132050 -1.886346 0.567743 0.235513 5.300000
2.640643 -0.229945 -1.811351 0.547415 0.294734 5.300000
2.488094 -0.320432 -1.736353 0.522149 0.395076 5.300000
2.339562 -0.402892 -1.661351 0.489975 0.495078 5.300000
2.194875 -0.476601 -1.586450 0.450915 0.593400 5.300000
2.053810 -0.541319 -1.514624 0.409353 0.593400 5.300000
1.917173 -0.597411 -1.439628 0.369812 0.593400 5.300000
1.785518 -0.645633 -1.364631 0.332288 0.593400 5.300000
1.659320 -0.686681 -1.289631 0.296766 0.593400 5.300000
1.538995 -0.721283 -1.214627 0.263255 0.593400 5.300000
1.424867 -0.750118 -1.139631 0.231743 0.593400 5.300000
1.317240 -0.773847 -1.064625 0.202250 0.593400 5.300000
1.216354 -0.793098 -0.989628 0.174757 0.593400 5.300000
1.122388 -0.808451 -0.914626 0.149270 0.593400 5.300000
1.035504 -0.820480 -0.839624 0.125793 0.593400 5.300000
0.955825 -0.829689 -0.764627 0.104323 0.593400 5.300000
0.883441 -0.836551 -0.689632 0.084859 0.593400 5.300000
0.818416 -0.841519 -0.614626 0.067406 0.593400 5.300000
0.760806 -0.844958 -0.539629 0.051960 0.593400 5.300000
0.710645 -0.847223 -0.464627 0.038515 0.593400 5.300000
0.667955 -0.848628 -0.389625 0.027093 0.593400 5.300000
0.632753 -0.849417 -0.314628 0.017660 0.593400 5.300000
0.605045 -0.849807 -0.239622 0.010244 0.593400 5.300000
0.584831 -0.849955 -0.164626 0.004839 0.593400 5.300000
0.572110 -0.849998 -0.089622 0.001433 0.593400 5.300000
