# Supplementary material for: Automatic Parking Controller with a Twin Artificial Neural Network Architecture
Source: Hindawi journal article supplement (doi:10.1155/2019/4801985), 2019-01-01
Supplement: f1 [file 4801985.f1.zip › data/data_160.txt]

7.100000 1.800000 0.000000 0.000000 0.000000 5.300000
7.096321 1.800000 -0.075002 0.000053 -0.035812 5.300000
7.084980 1.800000 -0.150003 0.000381 -0.079501 5.300000
7.066264 1.799985 -0.224998 0.001250 -0.123369 5.300000
7.039988 1.799933 -0.299996 0.002940 -0.167682 5.300000
7.006267 1.799787 -0.375001 0.005708 -0.212625 5.300000
6.964997 1.799464 -0.450000 0.009879 -0.258449 5.300000
6.916262 1.798844 -0.525002 0.015751 -0.305546 5.300000
6.860011 1.797744 -0.599999 0.023724 -0.354504 5.300000
6.796299 1.795906 -0.674995 0.034191 -0.406563 5.300000
6.725102 1.792997 -0.750002 0.047707 -0.466058 5.300000
6.646476 1.788576 -0.824998 0.065030 -0.521132 5.300000
6.560481 1.782085 -0.900000 0.086102 -0.546325 5.300000
6.467174 1.772896 -0.975000 0.110344 -0.573053 5.300000
6.366710 1.760412 -1.049995 0.137179 -0.573552 5.300000
6.259204 1.743981 -1.125003 0.166023 -0.573348 5.300000
6.144873 1.723019 -1.199998 0.196863 -0.574360 5.300000
6.023922 1.696816 -1.274998 0.229698 -0.574319 5.300000
5.896676 1.664721 -1.350000 0.264483 -0.572016 5.300000
5.763438 1.625990 -1.424996 0.301297 -0.573214 5.300000
5.624659 1.579902 -1.500003 0.340152 -0.577845 5.300000
5.480801 1.525686 -1.574999 0.380186 -0.552872 5.300000
5.332238 1.462998 -1.649996 0.417159 -0.481073 5.300000
5.179159 1.392009 -1.724999 0.450532 -0.424947 5.300000
5.021716 1.312787 -1.799998 0.480955 -0.375013 5.300000
4.860041 1.225496 -1.875002 0.508560 -0.327807 5.300000
4.694183 1.130232 -1.952356 0.533365 -0.282294 5.300000
4.524582 1.027522 -1.996108 0.555054 -0.234277 5.300000
4.355600 0.920561 -2.000000 0.572700 -0.182904 5.300000
4.188293 0.810982 -2.000000 0.586340 -0.136341 5.300000
4.022292 0.699432 -2.000000 0.596377 -0.093029 5.300000
3.857230 0.586495 -2.000000 0.603041 -0.051800 5.300000
3.692729 0.472740 -2.000000 0.606468 -0.013685 5.300000
3.528434 0.358690 -2.000000 0.606415 0.014271 5.300000
3.363924 0.244956 -2.000000 0.602779 0.052119 5.300000
3.198821 0.132081 -2.000000 0.595846 0.093916 5.300000
3.032840 0.020712 -1.987456 0.585588 0.135945 5.300000
2.868957 -0.086485 -1.920401 0.572315 0.169457 5.300000
2.709973 -0.187227 -1.844756 0.556483 0.250527 5.300000
2.555524 -0.281082 -1.769755 0.534262 0.350542 5.300000
2.405232 -0.367208 -1.694754 0.505142 0.450536 5.300000
2.258879 -0.444831 -1.619423 0.469104 0.556704 5.300000
2.116120 -0.513603 -1.548192 0.427603 0.593400 5.300000
1.977441 -0.573446 -1.473032 0.387176 0.593400 5.300000
1.843512 -0.625084 -1.398029 0.348753 0.593400 5.300000
1.714822 -0.669231 -1.323033 0.312340 0.593400 5.300000
1.591837 -0.706624 -1.248037 0.277927 0.593400 5.300000
1.474908 -0.737946 -1.173032 0.245533 0.593400 5.300000
1.364357 -0.763877 -1.098034 0.215139 0.593400 5.300000
1.260445 -0.785042 -1.023033 0.186756 0.593400 5.300000
1.163372 -0.802055 -0.948030 0.160372 0.593400 5.300000
1.073321 -0.815500 -0.873033 0.136000 0.593400 5.300000
0.990420 -0.825899 -0.798028 0.113635 0.593400 5.300000
0.914771 -0.833758 -0.723030 0.093281 0.593400 5.300000
0.846459 -0.839514 -0.648034 0.074933 0.593400 5.300000
0.785548 -0.843589 -0.573034 0.058594 0.593400 5.300000
0.732066 -0.846341 -0.498030 0.044261 0.593400 5.300000
0.686050 -0.848092 -0.423034 0.031928 0.593400 5.300000
0.647510 -0.849127 -0.348028 0.021613 0.593400 5.300000
0.616455 -0.849673 -0.273032 0.013298 0.593400 5.300000
0.592907 -0.849909 -0.198029 0.007000 0.593400 5.300000
0.576855 -0.849984 -0.123028 0.002705 0.593400 5.300000
