# Supplementary material for: Automatic Parking Controller with a Twin Artificial Neural Network Architecture
Source: Hindawi journal article supplement (doi:10.1155/2019/4801985), 2019-01-01
Supplement: f1 [file 4801985.f1.zip › data/data_161.txt]

7.200000 1.800000 0.000000 0.000000 0.000000 5.300000
7.196326 1.800000 -0.074999 0.000052 -0.032996 5.300000
7.184980 1.800000 -0.149997 0.000370 -0.074446 5.300000
7.166274 1.799986 -0.224995 0.001193 -0.115947 5.300000
7.139991 1.799937 -0.300002 0.002793 -0.157692 5.300000
7.106260 1.799798 -0.375003 0.005416 -0.199797 5.300000
7.065000 1.799493 -0.450001 0.009344 -0.242357 5.300000
7.016261 1.798905 -0.525000 0.014877 -0.285535 5.300000
6.960014 1.797870 -0.599999 0.022310 -0.329564 5.300000
6.896279 1.796141 -0.674997 0.032003 -0.374823 5.300000
6.825100 1.793438 -0.749995 0.044346 -0.421981 5.300000
6.746443 1.789343 -0.825002 0.059824 -0.475414 5.300000
6.660409 1.783387 -0.900003 0.078919 -0.508046 5.300000
6.567035 1.774967 -0.975001 0.101154 -0.532539 5.300000
6.466449 1.763489 -1.050000 0.126531 -0.557305 5.300000
6.358770 1.748229 -1.124999 0.155134 -0.573520 5.300000
6.244211 1.728499 -1.199997 0.185989 -0.573530 5.300000
6.122993 1.703627 -1.274995 0.218805 -0.573519 5.300000
5.995388 1.672910 -1.350003 0.253618 -0.573496 5.300000
5.861754 1.635653 -1.425003 0.290432 -0.573556 5.300000
5.722471 1.591063 -1.500001 0.328772 -0.559839 5.300000
5.577924 1.538704 -1.575000 0.365576 -0.504696 5.300000
5.428366 1.478440 -1.649998 0.399717 -0.455010 5.300000
5.274008 1.410257 -1.724997 0.431525 -0.410082 5.300000
5.115063 1.334138 -1.799995 0.461079 -0.367390 5.300000
4.951658 1.250082 -1.875003 0.488368 -0.325934 5.300000
4.783908 1.158206 -1.951632 0.513255 -0.285192 5.300000
4.612341 1.058895 -1.998301 0.535469 -0.241633 5.300000
4.441277 0.955171 -2.000000 0.553964 -0.194472 5.300000
4.272006 0.848646 -2.000000 0.568756 -0.151681 5.300000
4.104138 0.739917 -2.000000 0.580218 -0.112119 5.300000
3.937368 0.629537 -2.000000 0.588602 -0.074793 5.300000
3.771360 0.517992 -2.000000 0.594080 -0.038833 5.300000
3.605794 0.405783 -2.000000 0.596664 -0.007603 5.300000
3.440365 0.293387 -2.000000 0.596185 0.015126 5.300000
3.274691 0.181354 -2.000000 0.592477 0.048634 5.300000
3.108367 0.070112 -1.998112 0.585926 0.085594 5.300000
2.942493 -0.038924 -1.953722 0.576594 0.115665 5.300000
2.781275 -0.142480 -1.878670 0.564202 0.204522 5.300000
2.624831 -0.239557 -1.803666 0.545145 0.305315 5.300000
2.472704 -0.329255 -1.728667 0.519174 0.405324 5.300000
2.324569 -0.410853 -1.653669 0.486294 0.505322 5.300000
2.180238 -0.483662 -1.579689 0.446619 0.593400 5.300000
2.039605 -0.547446 -1.506945 0.405212 0.593400 5.300000
1.903455 -0.602699 -1.431949 0.365876 0.593400 5.300000
1.772336 -0.650155 -1.356953 0.328558 0.593400 5.300000
1.646720 -0.690513 -1.281948 0.293241 0.593400 5.300000
1.527018 -0.724493 -1.206949 0.259934 0.593400 5.300000
1.413544 -0.752773 -1.131950 0.228630 0.593400 5.300000
1.306598 -0.776012 -1.056945 0.199343 0.593400 5.300000
1.206409 -0.794839 -0.981949 0.172055 0.593400 5.300000
1.113162 -0.809826 -0.906944 0.146776 0.593400 5.300000
1.027010 -0.821542 -0.831946 0.123500 0.593400 5.300000
0.948075 -0.830490 -0.756945 0.102238 0.593400 5.300000
0.876443 -0.837139 -0.681950 0.082979 0.593400 5.300000
0.812178 -0.841935 -0.606946 0.065732 0.593400 5.300000
0.755326 -0.845241 -0.531950 0.050492 0.593400 5.300000
0.705925 -0.847402 -0.456945 0.037253 0.593400 5.300000
0.664006 -0.848733 -0.381947 0.026034 0.593400 5.300000
0.629569 -0.849472 -0.306946 0.016810 0.593400 5.300000
0.602634 -0.849830 -0.231943 0.009600 0.593400 5.300000
0.583191 -0.849962 -0.156946 0.004400 0.593400 5.300000
0.571233 -0.850000 -0.081941 0.001198 0.593400 5.300000
