# Supplementary material for: Automatic Parking Controller with a Twin Artificial Neural Network Architecture
Source: Hindawi journal article supplement (doi:10.1155/2019/4801985), 2019-01-01
Supplement: f1 [file 4801985.f1.zip › data/data_162.txt]

7.300000 1.800000 0.000000 -0.000000 0.000000 5.300000
7.296332 1.800000 -0.074998 0.000050 -0.030720 5.300000
7.284978 1.800000 -0.149995 0.000350 -0.070399 5.300000
7.266277 1.799986 -0.225004 0.001146 -0.110032 5.300000
7.239987 1.799934 -0.300001 0.002682 -0.149793 5.300000
7.206258 1.799809 -0.374999 0.005183 -0.189729 5.300000
7.165003 1.799515 -0.449997 0.008931 -0.229879 5.300000
7.116247 1.798952 -0.524995 0.014186 -0.270280 5.300000
7.060023 1.797967 -0.600004 0.021233 -0.310997 5.300000
6.996282 1.796327 -0.675001 0.030366 -0.352096 5.300000
6.925090 1.793770 -0.749999 0.041908 -0.393714 5.300000
6.846423 1.789916 -0.824996 0.056222 -0.436908 5.300000
6.760360 1.784331 -0.900005 0.073665 -0.473087 5.300000
6.666938 1.776484 -0.975002 0.094191 -0.497797 5.300000
6.566251 1.765792 -1.050000 0.117660 -0.522512 5.300000
6.458440 1.751611 -1.124998 0.144322 -0.547329 5.300000
6.343657 1.733173 -1.199995 0.174407 -0.571694 5.300000
6.222172 1.709719 -1.275004 0.207178 -0.572403 5.300000
6.094220 1.680491 -1.350002 0.242025 -0.573634 5.300000
5.960145 1.644780 -1.425000 0.278399 -0.562911 5.300000
5.820292 1.602041 -1.499997 0.314265 -0.520766 5.300000
5.674929 1.551968 -1.574995 0.348499 -0.479343 5.300000
5.524318 1.494407 -1.650004 0.381109 -0.439990 5.300000
5.368684 1.429174 -1.725001 0.412034 -0.401756 5.300000
5.208259 1.356205 -1.799999 0.441182 -0.364207 5.300000
5.043217 1.275447 -1.874997 0.468425 -0.327094 5.300000
4.873694 1.186900 -1.950669 0.493634 -0.290408 5.300000
4.700273 1.090958 -2.000000 0.516471 -0.250866 5.300000
4.527291 0.990401 -2.000000 0.535893 -0.206528 5.300000
4.356175 0.886873 -2.000000 0.551823 -0.166751 5.300000
4.186576 0.780877 -2.000000 0.564680 -0.130291 5.300000
4.018187 0.672960 -2.000000 0.574697 -0.096188 5.300000
3.850736 0.563596 -2.000000 0.582042 -0.063749 5.300000
3.683961 0.453204 -2.000000 0.586876 -0.032275 5.300000
3.517582 0.342228 -2.000000 0.589180 -0.005107 5.300000
3.351309 0.231081 -2.000000 0.588755 0.011726 5.300000
3.184819 0.120252 -2.000000 0.585391 0.040524 5.300000
3.017996 0.010299 -1.987482 0.579645 0.074844 5.300000
2.854234 -0.095980 -1.913020 0.570513 0.159304 5.300000
2.695671 -0.196098 -1.837903 0.554757 0.259679 5.300000
2.541618 -0.289290 -1.762898 0.531875 0.359676 5.300000
2.391695 -0.374660 -1.687897 0.502153 0.459684 5.300000
2.245699 -0.451475 -1.612399 0.465428 0.568873 5.300000
2.103263 -0.519434 -1.541203 0.423824 0.593400 5.300000
1.964996 -0.578494 -1.466175 0.383583 0.593400 5.300000
1.831525 -0.629420 -1.391175 0.345342 0.593400 5.300000
1.703339 -0.672918 -1.316179 0.309112 0.593400 5.300000
1.580895 -0.709727 -1.241181 0.274884 0.593400 5.300000
1.464534 -0.740527 -1.166176 0.242673 0.593400 5.300000
1.354579 -0.765999 -1.091180 0.212462 0.593400 5.300000
1.251287 -0.786760 -1.016176 0.184261 0.593400 5.300000
1.154848 -0.803424 -0.941176 0.158060 0.593400 5.300000
1.065445 -0.816570 -0.866177 0.133874 0.593400 5.300000
0.983205 -0.826716 -0.791173 0.111692 0.593400 5.300000
0.908223 -0.834366 -0.716177 0.091521 0.593400 5.300000
0.840584 -0.839951 -0.641181 0.073358 0.593400 5.300000
0.780350 -0.843888 -0.566177 0.057198 0.593400 5.300000
0.727550 -0.846537 -0.491177 0.043048 0.593400 5.300000
0.682215 -0.848213 -0.416178 0.030904 0.593400 5.300000
0.644363 -0.849194 -0.341173 0.020769 0.593400 5.300000
0.613993 -0.849705 -0.266177 0.012637 0.593400 5.300000
0.591126 -0.849921 -0.191172 0.006523 0.593400 5.300000
0.575755 -0.849986 -0.116174 0.002410 0.593400 5.300000
