# Supplementary material for: Automatic Parking Controller with a Twin Artificial Neural Network Architecture
Source: Hindawi journal article supplement (doi:10.1155/2019/4801985), 2019-01-01
Supplement: f1 [file 4801985.f1.zip › data/data_163.txt]

6.000000 1.000000 0.000000 0.000000 0.000000 5.200000
5.996248 1.000000 -0.075000 0.000051 -0.033222 5.200000
5.985017 1.000000 -0.149999 0.000354 -0.073690 5.200000
5.966259 0.999988 -0.224999 0.001157 -0.114147 5.200000
5.939989 0.999930 -0.299998 0.002708 -0.154760 5.200000
5.906255 0.999799 -0.374998 0.005254 -0.195564 5.200000
5.865008 0.999510 -0.449997 0.009061 -0.236598 5.200000
5.816246 0.998938 -0.524997 0.014418 -0.277908 5.200000
5.760015 0.997931 -0.599997 0.021597 -0.319584 5.200000
5.696294 0.996267 -0.674996 0.030906 -0.361741 5.200000
5.625083 0.993654 -0.749996 0.042704 -0.404563 5.200000
5.546432 0.989724 -0.824995 0.057360 -0.448389 5.200000
5.460380 0.984025 -0.899995 0.075299 -0.492100 5.200000
5.366976 0.975992 -0.974994 0.096634 -0.517840 5.200000
5.266321 0.965005 -1.049994 0.121040 -0.542561 5.200000
5.158561 0.950395 -1.124998 0.148744 -0.568578 5.200000
5.043875 0.931411 -1.200003 0.179524 -0.576856 5.200000
4.922495 0.907312 -1.275003 0.212405 -0.577045 5.200000
4.794713 0.877418 -1.350002 0.247257 -0.576781 5.200000
4.660831 0.840998 -1.425002 0.284057 -0.574303 5.200000
4.521254 0.797359 -1.500002 0.321342 -0.540990 5.200000
4.376285 0.746160 -1.575001 0.357020 -0.498898 5.200000
4.226213 0.687212 -1.650001 0.391138 -0.461164 5.200000
4.071300 0.620292 -1.725000 0.423775 -0.425912 5.200000
3.911815 0.545282 -1.800000 0.454962 -0.392486 5.200000
3.748002 0.462071 -1.874999 0.484681 -0.360983 5.200000
3.580070 0.370561 -1.950262 0.512525 -0.320292 5.200000
3.408454 0.271192 -1.997066 0.535831 -0.242255 5.200000
3.237347 0.167632 -2.000000 0.551460 -0.144216 5.200000
3.067465 0.062105 -1.998850 0.558856 -0.044216 5.200000
2.900033 -0.042735 -1.939479 0.558463 0.055783 5.200000
2.738408 -0.142971 -1.864293 0.550528 0.155782 5.200000
2.582065 -0.237448 -1.789294 0.535427 0.255782 5.200000
2.430485 -0.325265 -1.714294 0.513468 0.355781 5.200000
2.283328 -0.405632 -1.639294 0.484875 0.455781 5.200000
2.140395 -0.477857 -1.563824 0.449627 0.560709 5.200000
2.001106 -0.541705 -1.498503 0.409291 0.593400 5.200000
1.866033 -0.597193 -1.422868 0.370196 0.593400 5.200000
1.735974 -0.644907 -1.347869 0.333123 0.593400 5.200000
1.611415 -0.685577 -1.272862 0.298045 0.593400 5.200000
1.492747 -0.719900 -1.197864 0.264983 0.593400 5.200000
1.380311 -0.748545 -1.122866 0.233925 0.593400 5.200000
1.274373 -0.772168 -1.047868 0.204871 0.593400 5.200000
1.175185 -0.791376 -0.972870 0.177833 0.593400 5.200000
1.082926 -0.806768 -0.897862 0.152792 0.593400 5.200000
0.997751 -0.818886 -0.822864 0.129761 0.593400 5.200000
0.919771 -0.828227 -0.747866 0.108749 0.593400 5.200000
0.849089 -0.835265 -0.672868 0.089730 0.593400 5.200000
0.785759 -0.840419 -0.597870 0.072727 0.593400 5.200000
0.729846 -0.844076 -0.522861 0.057729 0.593400 5.200000
0.681369 -0.846559 -0.447863 0.044741 0.593400 5.200000
0.640372 -0.848174 -0.372865 0.033751 0.593400 5.200000
0.606849 -0.849151 -0.297867 0.024778 0.593400 5.200000
0.580819 -0.849710 -0.222869 0.017809 0.593400 5.200000
0.562288 -0.849991 -0.147869 0.012869 0.573754 5.200000
0.551260 -0.850117 -0.072863 0.010331 0.469528 5.200000
0.547726 -0.850150 0.002135 0.009672 0.369527 5.200000
0.551663 -0.850118 0.077133 0.010164 0.269526 5.200000
0.563130 -0.849990 0.152113 0.011151 0.169544 5.200000
0.579654 -0.849794 0.142441 0.012143 0.179252 5.200000
0.590163 -0.849665 0.067343 0.013091 0.279386 5.200000
0.593022 -0.849630 -0.007655 0.013449 0.379387 5.200000
0.588587 -0.849688 -0.082653 0.012609 0.479388 5.200000
0.576577 -0.849818 -0.158876 0.009771 0.586804 5.200000
0.558596 -0.849958 -0.169653 0.004980 0.593400 5.200000
0.545610 -0.849998 -0.091873 0.001499 0.593400 5.200000
