# Supplementary material for: Automatic Parking Controller with a Twin Artificial Neural Network Architecture
Source: Hindawi journal article supplement (doi:10.1155/2019/4801985), 2019-01-01
Supplement: f1 [file 4801985.f1.zip › data/data_164.txt]

6.100000 1.000000 0.000000 0.000000 0.000000 5.200000
6.096248 1.000000 -0.075005 0.000043 -0.029186 5.200000
6.085019 1.000000 -0.149997 0.000328 -0.066394 5.200000
6.066254 0.999990 -0.225002 0.001072 -0.103476 5.200000
6.039996 0.999934 -0.299999 0.002497 -0.140579 5.200000
6.006257 0.999816 -0.375000 0.004831 -0.177668 5.200000
5.965000 0.999552 -0.450004 0.008314 -0.214731 5.200000
5.916248 0.999026 -0.524998 0.013195 -0.251715 5.200000
5.860012 0.998105 -0.600002 0.019704 -0.288569 5.200000
5.796280 0.996596 -0.674996 0.028093 -0.325208 5.200000
5.725064 0.994220 -0.750000 0.038637 -0.361496 5.200000
5.646402 0.990678 -0.825000 0.051595 -0.397562 5.200000
5.560302 0.985576 -0.899998 0.067202 -0.425955 5.200000
5.466826 0.978439 -0.975002 0.085362 -0.450675 5.200000
5.366042 0.968766 -1.049995 0.106210 -0.475388 5.200000
5.258054 0.955970 -1.125000 0.129988 -0.500110 5.200000
5.142993 0.939367 -1.200004 0.156906 -0.524829 5.200000
5.021077 0.918205 -1.274997 0.187212 -0.549936 5.200000
4.892544 0.891643 -1.350002 0.220414 -0.554441 5.200000
4.757701 0.858955 -1.424997 0.255047 -0.542794 5.200000
4.616872 0.819559 -1.499999 0.290272 -0.524362 5.200000
4.470366 0.772946 -1.575003 0.325619 -0.502663 5.200000
4.318539 0.718646 -1.649997 0.360804 -0.480006 5.200000
4.161734 0.656312 -1.725002 0.395675 -0.457714 5.200000
4.000320 0.585569 -1.799995 0.430210 -0.436572 5.200000
3.834665 0.506064 -1.874999 0.464417 -0.417640 5.200000
3.665140 0.417526 -1.951773 0.497356 -0.375296 5.200000
3.492276 0.320405 -1.996878 0.525195 -0.293691 5.200000
3.320307 0.218302 -2.000000 0.544902 -0.192808 5.200000
3.149924 0.113540 -2.000000 0.556353 -0.092808 5.200000
2.980675 0.007753 -1.978455 0.559659 0.007192 5.200000
2.816243 -0.094926 -1.900737 0.555303 0.107191 5.200000
2.657408 -0.192330 -1.825738 0.543626 0.207191 5.200000
2.503572 -0.283483 -1.750739 0.524980 0.307191 5.200000
2.354299 -0.367565 -1.675734 0.499589 0.407191 5.200000
2.209313 -0.443829 -1.600741 0.467615 0.507190 5.200000
2.068415 -0.511717 -1.527710 0.429110 0.593400 5.200000
1.931064 -0.571243 -1.459310 0.388936 0.593400 5.200000
1.798513 -0.622651 -1.384312 0.350891 0.593400 5.200000
1.671232 -0.666648 -1.309303 0.314839 0.593400 5.200000
1.549656 -0.703967 -1.234306 0.280793 0.593400 5.200000
1.434151 -0.735288 -1.159307 0.248761 0.593400 5.200000
1.325018 -0.761274 -1.084309 0.218734 0.593400 5.200000
1.222527 -0.782558 -1.009311 0.190721 0.593400 5.200000
1.126882 -0.799730 -0.934305 0.164714 0.593400 5.200000
1.038241 -0.813375 -0.859305 0.140701 0.593400 5.200000
0.956757 -0.824001 -0.784307 0.118711 0.593400 5.200000
0.882520 -0.832110 -0.709309 0.098721 0.593400 5.200000
0.815606 -0.838122 -0.634311 0.080740 0.593400 5.200000
0.756084 -0.842462 -0.559307 0.064767 0.593400 5.200000
0.703993 -0.845481 -0.484305 0.050798 0.593400 5.200000
0.659359 -0.847482 -0.409307 0.038841 0.593400 5.200000
0.622201 -0.848742 -0.334309 0.028887 0.593400 5.200000
0.592529 -0.849479 -0.259311 0.020945 0.593400 5.200000
0.570359 -0.849881 -0.184313 0.015001 0.592173 5.200000
0.555682 -0.850065 -0.109304 0.011277 0.518113 5.200000
0.548539 -0.850142 -0.034307 0.009812 0.418122 5.200000
0.548769 -0.850138 0.040691 0.009814 0.318121 5.200000
0.556621 -0.850056 0.115711 0.010649 0.218099 5.200000
0.571851 -0.849890 0.178880 0.011661 0.130671 5.200000
0.585991 -0.849723 0.103784 0.012655 0.230801 5.200000
0.592676 -0.849631 0.028786 0.013399 0.330801 5.200000
0.591707 -0.849645 -0.046212 0.013220 0.430802 5.200000
0.583350 -0.849746 -0.121210 0.011457 0.530802 5.200000
0.567389 -0.849901 -0.189930 0.007331 0.593400 5.200000
0.550959 -0.849985 -0.128314 0.002937 0.593400 5.200000
