# Supplementary material for: Automatic Parking Controller with a Twin Artificial Neural Network Architecture
Source: Hindawi journal article supplement (doi:10.1155/2019/4801985), 2019-01-01
Supplement: f1 [file 4801985.f1.zip › data/data_165.txt]

6.200000 1.000000 0.000000 0.000000 0.000000 5.200000
6.196249 1.000000 -0.074999 0.000042 -0.025324 5.200000
6.185021 1.000000 -0.150001 0.000303 -0.059471 5.200000
6.166243 0.999991 -0.224997 0.000983 -0.093384 5.200000
6.139995 0.999949 -0.300003 0.002297 -0.127237 5.200000
6.106263 0.999835 -0.374997 0.004440 -0.160965 5.200000
6.064998 0.999590 -0.450004 0.007629 -0.194514 5.200000
6.016251 0.999104 -0.524998 0.012068 -0.227802 5.200000
5.960016 0.998271 -0.600003 0.017971 -0.260730 5.200000
5.896268 0.996883 -0.675000 0.025572 -0.293155 5.200000
5.825063 0.994732 -0.750001 0.035056 -0.324878 5.200000
5.746381 0.991532 -0.825000 0.046607 -0.350954 5.200000
5.660248 0.986931 -0.899997 0.060249 -0.375672 5.200000
5.566716 0.980556 -0.974998 0.076156 -0.400393 5.200000
5.465838 0.971933 -1.049998 0.094513 -0.425114 5.200000
5.357686 0.960550 -1.124995 0.115545 -0.449832 5.200000
5.242382 0.945786 -1.200000 0.139460 -0.474908 5.200000
5.120075 0.926955 -1.274994 0.166287 -0.492642 5.200000
4.990967 0.903343 -1.350001 0.195540 -0.501542 5.200000
4.855313 0.874273 -1.424995 0.226860 -0.504373 5.200000
4.713377 0.839027 -1.500001 0.259876 -0.502530 5.200000
4.565494 0.796968 -1.574997 0.294229 -0.496750 5.200000
4.412040 0.747478 -1.650000 0.329672 -0.488964 5.200000
4.253409 0.689951 -1.724998 0.366048 -0.480793 5.200000
4.090054 0.623798 -1.799997 0.403373 -0.473825 5.200000
3.922478 0.548448 -1.875000 0.441813 -0.469678 5.200000
3.751239 0.463310 -1.949995 0.480046 -0.427148 5.200000
3.576977 0.368783 -1.999849 0.512510 -0.342330 5.200000
3.403863 0.268486 -2.000000 0.536333 -0.241530 5.200000
3.232820 0.164840 -2.000000 0.551777 -0.141534 5.200000
3.062846 0.059209 -1.996815 0.559050 -0.041527 5.200000
2.895599 -0.045492 -1.937306 0.558501 0.058469 5.200000
2.734142 -0.145600 -1.862280 0.550196 0.158474 5.200000
2.577923 -0.239910 -1.787276 0.534908 0.258472 5.200000
2.426469 -0.327521 -1.712281 0.512793 0.358468 5.200000
2.279430 -0.407686 -1.637274 0.484020 0.458473 5.200000
2.136614 -0.479681 -1.561679 0.448570 0.564734 5.200000
1.997411 -0.543305 -1.496539 0.408212 0.593400 5.200000
1.862467 -0.598575 -1.420851 0.369173 0.593400 5.200000
1.732550 -0.646089 -1.345852 0.332153 0.593400 5.200000
1.608145 -0.686579 -1.270845 0.297130 0.593400 5.200000
1.489640 -0.720741 -1.195847 0.264121 0.593400 5.200000
1.377376 -0.749243 -1.120848 0.233117 0.593400 5.200000
1.271616 -0.772739 -1.045850 0.204118 0.593400 5.200000
1.172612 -0.791837 -0.970853 0.177134 0.593400 5.200000
1.080541 -0.807135 -0.895844 0.152146 0.593400 5.200000
0.995559 -0.819172 -0.820846 0.129169 0.593400 5.200000
0.917773 -0.828445 -0.745848 0.108211 0.593400 5.200000
0.847288 -0.835426 -0.670850 0.089246 0.593400 5.200000
0.784157 -0.840536 -0.595853 0.072297 0.593400 5.200000
0.728444 -0.844157 -0.520843 0.057352 0.593400 5.200000
0.680168 -0.846613 -0.445846 0.044419 0.593400 5.200000
0.639371 -0.848207 -0.370848 0.033483 0.593400 5.200000
0.606049 -0.849171 -0.295850 0.024564 0.593400 5.200000
0.580222 -0.849720 -0.220852 0.017649 0.593400 5.200000
0.561892 -0.849995 -0.145851 0.012769 0.571377 5.200000
0.551064 -0.850119 -0.070846 0.010292 0.466839 5.200000
0.547743 -0.850150 0.004152 0.009675 0.366837 5.200000
0.551865 -0.850116 0.079150 0.010186 0.266836 5.200000
0.563538 -0.849985 0.153818 0.011179 0.167144 5.200000
0.580029 -0.849790 0.140324 0.012170 0.182075 5.200000
0.590332 -0.849662 0.065325 0.013110 0.282076 5.200000
0.593026 -0.849630 -0.009673 0.013449 0.382077 5.200000
0.588360 -0.849691 -0.084671 0.012562 0.482078 5.200000
0.576150 -0.849822 -0.160806 0.009660 0.588963 5.200000
0.558138 -0.849960 -0.166970 0.004858 0.593400 5.200000
0.545362 -0.849998 -0.089855 0.001433 0.593400 5.200000
