# Supplementary material for: Automatic Parking Controller with a Twin Artificial Neural Network Architecture
Source: Hindawi journal article supplement (doi:10.1155/2019/4801985), 2019-01-01
Supplement: f1 [file 4801985.f1.zip › data/data_166.txt]

6.300000 1.000000 0.000000 0.000000 0.000000 5.200000
6.296264 1.000000 -0.075000 0.000040 -0.021185 5.200000
6.285028 1.000000 -0.150000 0.000277 -0.052083 5.200000
6.266243 0.999992 -0.224999 0.000898 -0.082653 5.200000
6.240006 0.999952 -0.299999 0.002089 -0.113102 5.200000
6.206258 0.999847 -0.374999 0.004024 -0.143353 5.200000
6.164998 0.999625 -0.449999 0.006895 -0.173347 5.200000
6.116255 0.999190 -0.524999 0.010888 -0.202975 5.200000
6.060004 0.998433 -0.599998 0.016187 -0.232197 5.200000
5.996266 0.997193 -0.674998 0.022962 -0.258475 5.200000
5.925048 0.995264 -0.749998 0.031306 -0.283141 5.200000
5.846346 0.992409 -0.824998 0.041376 -0.307864 5.200000
5.760194 0.988334 -0.899998 0.053347 -0.332576 5.200000
5.666616 0.982687 -0.974997 0.067392 -0.357300 5.200000
5.565650 0.975058 -1.049997 0.083715 -0.382014 5.200000
5.457374 0.964967 -1.124997 0.102489 -0.406116 5.200000
5.341874 0.951851 -1.199997 0.123724 -0.425015 5.200000
5.219256 0.935140 -1.274997 0.147353 -0.440798 5.200000
5.089689 0.914210 -1.349996 0.173313 -0.453797 5.200000
4.953367 0.888363 -1.424996 0.201550 -0.464151 5.200000
4.810548 0.856922 -1.500002 0.231974 -0.472244 5.200000
4.661516 0.819154 -1.575006 0.264516 -0.478898 5.200000
4.506634 0.774318 -1.650006 0.299178 -0.485308 5.200000
4.346323 0.721634 -1.725005 0.336073 -0.493202 5.200000
4.181126 0.660266 -1.800005 0.375545 -0.505062 5.200000
4.011645 0.589258 -1.875005 0.418405 -0.525881 5.200000
3.838635 0.507779 -1.952250 0.460891 -0.468381 5.200000
3.662712 0.416201 -1.990535 0.497589 -0.390398 5.200000
3.488459 0.318185 -2.000000 0.525742 -0.290608 5.200000
3.316522 0.216022 -2.000000 0.545208 -0.190608 5.200000
3.146188 0.111213 -2.000000 0.556522 -0.090608 5.200000
2.977033 0.005469 -1.973273 0.559431 0.009392 5.200000
2.812688 -0.097117 -1.899087 0.555179 0.109391 5.200000
2.653972 -0.194405 -1.824087 0.543273 0.209391 5.200000
2.500240 -0.285409 -1.749087 0.524489 0.309391 5.200000
2.351060 -0.369322 -1.674087 0.498965 0.409390 5.200000
2.206171 -0.445418 -1.599087 0.466834 0.509390 5.200000
2.065346 -0.513121 -1.526468 0.428212 0.593400 5.200000
1.928094 -0.572459 -1.457660 0.388077 0.593400 5.200000
1.795654 -0.623696 -1.382662 0.350077 0.593400 5.200000
1.668495 -0.667538 -1.307653 0.314069 0.593400 5.200000
1.547049 -0.704718 -1.232656 0.280067 0.593400 5.200000
1.431681 -0.735914 -1.157658 0.248079 0.593400 5.200000
1.322692 -0.761790 -1.082659 0.218096 0.593400 5.200000
1.220349 -0.782978 -1.007661 0.190127 0.593400 5.200000
1.124857 -0.800066 -0.932654 0.164164 0.593400 5.200000
1.036371 -0.813639 -0.857655 0.140195 0.593400 5.200000
0.955045 -0.824205 -0.782657 0.118250 0.593400 5.200000
0.880969 -0.832263 -0.707659 0.098303 0.593400 5.200000
0.814216 -0.838235 -0.632661 0.080367 0.593400 5.200000
0.754858 -0.842542 -0.557657 0.064438 0.593400 5.200000
0.702930 -0.845534 -0.482655 0.050513 0.593400 5.200000
0.658460 -0.847518 -0.407657 0.038600 0.593400 5.200000
0.621467 -0.848763 -0.332659 0.028691 0.593400 5.200000
0.591959 -0.849491 -0.257661 0.020792 0.593400 5.200000
0.569954 -0.849887 -0.182663 0.014892 0.591787 5.200000
0.555442 -0.850068 -0.107654 0.011223 0.515913 5.200000
0.548472 -0.850143 -0.032657 0.009800 0.415921 5.200000
0.548852 -0.850138 0.042341 0.009824 0.315921 5.200000
0.556873 -0.850054 0.117402 0.010671 0.215856 5.200000
0.572214 -0.849885 0.178725 0.011683 0.130876 5.200000
0.586211 -0.849721 0.102134 0.012675 0.233001 5.200000
0.592717 -0.849630 0.027136 0.013404 0.333001 5.200000
0.591605 -0.849647 -0.047862 0.013201 0.433002 5.200000
0.583082 -0.849748 -0.122860 0.011394 0.533002 5.200000
0.566970 -0.849904 -0.190717 0.007218 0.593400 5.200000
0.550677 -0.849986 -0.126664 0.002862 0.593400 5.200000
