# Supplementary material for: Automatic Parking Controller with a Twin Artificial Neural Network Architecture
Source: Hindawi journal article supplement (doi:10.1155/2019/4801985), 2019-01-01
Supplement: f1 [file 4801985.f1.zip › data/data_167.txt]

6.400000 1.000000 0.000000 0.000000 0.000000 5.200000
6.396265 1.000000 -0.074999 0.000039 -0.017353 5.200000
6.385021 1.000000 -0.149996 0.000253 -0.044952 5.200000
6.366240 0.999992 -0.224997 0.000810 -0.072348 5.200000
6.340010 0.999956 -0.300000 0.001885 -0.099584 5.200000
6.306254 0.999867 -0.375002 0.003627 -0.126604 5.200000
6.264998 0.999665 -0.450001 0.006195 -0.151643 5.200000
6.216256 0.999273 -0.524999 0.009729 -0.176352 5.200000
6.159997 0.998597 -0.599998 0.014381 -0.201071 5.200000
6.096265 0.997499 -0.675001 0.020295 -0.225790 5.200000
6.025038 0.995799 -0.750004 0.027652 -0.250509 5.200000
5.946327 0.993274 -0.825003 0.036616 -0.275230 5.200000
5.860156 0.989664 -0.899998 0.047349 -0.299740 5.200000
5.766539 0.984639 -0.975000 0.059978 -0.321869 5.200000
5.665521 0.977846 -1.049998 0.074560 -0.342365 5.200000
5.557141 0.968859 -1.124996 0.091184 -0.361458 5.200000
5.441475 0.957199 -1.199997 0.109937 -0.379084 5.200000
5.318627 0.942347 -1.275001 0.130855 -0.395221 5.200000
5.188705 0.923727 -1.350002 0.153998 -0.410001 5.200000
5.051881 0.900725 -1.425000 0.179387 -0.423708 5.200000
4.908360 0.872659 -1.499998 0.207103 -0.436882 5.200000
4.758381 0.838790 -1.574999 0.237236 -0.450259 5.200000
4.602297 0.798353 -1.650003 0.270144 -0.468972 5.200000
4.440509 0.750398 -1.724994 0.306545 -0.494044 5.200000
4.273579 0.693880 -1.799997 0.346845 -0.518763 5.200000
4.102212 0.627655 -1.875000 0.391321 -0.543891 5.200000
3.927213 0.550497 -1.950466 0.438502 -0.523804 5.200000
3.749642 0.462482 -2.000000 0.480351 -0.440900 5.200000
3.573820 0.367007 -2.000000 0.513002 -0.339775 5.200000
3.400815 0.266664 -2.000000 0.536705 -0.239781 5.200000
3.229790 0.162982 -2.000000 0.551925 -0.139784 5.200000
3.059878 0.057348 -1.995444 0.559258 -0.039783 5.200000
2.892726 -0.047286 -1.936669 0.558467 0.060217 5.200000
2.731358 -0.147293 -1.860962 0.550010 0.160218 5.200000
2.575241 -0.241508 -1.785963 0.534568 0.260218 5.200000
2.423864 -0.328994 -1.710965 0.512350 0.360219 5.200000
2.276894 -0.409021 -1.635965 0.483452 0.460219 5.200000
2.134160 -0.480859 -1.560266 0.447876 0.567448 5.200000
1.995009 -0.544343 -1.495245 0.407512 0.593400 5.200000
1.860149 -0.599471 -1.419538 0.368508 0.593400 5.200000
1.730325 -0.646856 -1.344539 0.331523 0.593400 5.200000
1.606019 -0.687229 -1.269532 0.296535 0.593400 5.200000
1.487621 -0.721286 -1.194534 0.263562 0.593400 5.200000
1.375469 -0.749695 -1.119536 0.232593 0.593400 5.200000
1.269825 -0.773109 -1.044538 0.203629 0.593400 5.200000
1.170941 -0.792135 -0.969540 0.176679 0.593400 5.200000
1.078993 -0.807372 -0.894532 0.151726 0.593400 5.200000
0.994136 -0.819357 -0.819534 0.128785 0.593400 5.200000
0.916477 -0.828586 -0.744536 0.107862 0.593400 5.200000
0.846120 -0.835531 -0.669538 0.088931 0.593400 5.200000
0.783118 -0.840611 -0.594540 0.072017 0.593400 5.200000
0.727534 -0.844210 -0.519531 0.057108 0.593400 5.200000
0.679389 -0.846648 -0.444534 0.044210 0.593400 5.200000
0.638723 -0.848229 -0.369535 0.033309 0.593400 5.200000
0.605532 -0.849183 -0.294537 0.024425 0.593400 5.200000
0.579835 -0.849727 -0.219539 0.017545 0.593400 5.200000
0.561636 -0.849998 -0.144539 0.012705 0.569721 5.200000
0.550938 -0.850120 -0.069533 0.010267 0.465089 5.200000
0.547758 -0.850149 0.005465 0.009677 0.365087 5.200000
0.552001 -0.850115 0.080463 0.010201 0.265086 5.200000
0.563809 -0.849982 0.154968 0.011196 0.165514 5.200000
0.580270 -0.849787 0.139011 0.012187 0.183825 5.200000
0.590437 -0.849661 0.064013 0.013123 0.283826 5.200000
0.593028 -0.849630 -0.010985 0.013450 0.383827 5.200000
0.588211 -0.849693 -0.085983 0.012531 0.483828 5.200000
0.575870 -0.849825 -0.162028 0.009587 0.590168 5.200000
0.557844 -0.849961 -0.165243 0.004780 0.593400 5.200000
0.545205 -0.849999 -0.088543 0.001391 0.593400 5.200000
