# Supplementary material for: Automatic Parking Controller with a Twin Artificial Neural Network Architecture
Source: Hindawi journal article supplement (doi:10.1155/2019/4801985), 2019-01-01
Supplement: f1 [file 4801985.f1.zip › data/data_168.txt]

6.500000 1.000000 0.000000 0.000000 0.000000 5.200000
6.496273 1.000000 -0.075002 0.000033 -0.012531 5.200000
6.485028 1.000000 -0.150001 0.000211 -0.035568 5.200000
6.466238 0.999993 -0.224996 0.000702 -0.059556 5.200000
6.440008 0.999961 -0.300002 0.001625 -0.083373 5.200000
6.406244 0.999885 -0.374997 0.003130 -0.106998 5.200000
6.365001 0.999710 -0.450003 0.005361 -0.130363 5.200000
6.316259 0.999372 -0.524998 0.008450 -0.153400 5.200000
6.260001 0.998785 -0.600001 0.012542 -0.176042 5.200000
6.196265 0.997821 -0.674999 0.017764 -0.198204 5.200000
6.125028 0.996330 -0.750003 0.024253 -0.219818 5.200000
6.046310 0.994120 -0.825000 0.032119 -0.240801 5.200000
5.960124 0.990950 -0.899995 0.041479 -0.261082 5.200000
5.866472 0.986556 -0.975001 0.052465 -0.280606 5.200000
5.765399 0.980617 -1.049998 0.065155 -0.299349 5.200000
5.656927 0.972756 -1.125002 0.079660 -0.317311 5.200000
5.541134 0.962567 -1.199997 0.096073 -0.334551 5.200000
5.418066 0.949578 -1.275002 0.114485 -0.351210 5.200000
5.287839 0.933264 -1.349997 0.134992 -0.367373 5.200000
5.150576 0.913045 -1.425004 0.157820 -0.387544 5.200000
5.006445 0.888222 -1.499999 0.183508 -0.412387 5.200000
4.855700 0.858033 -1.574997 0.212321 -0.437102 5.200000
4.698631 0.821542 -1.650000 0.244505 -0.461825 5.200000
4.535662 0.777814 -1.725000 0.280283 -0.486006 5.200000
4.367291 0.725757 -1.800001 0.320063 -0.524321 5.200000
4.194206 0.664077 -1.874995 0.365089 -0.548771 5.200000
4.017298 0.591456 -1.951594 0.414215 -0.565535 5.200000
3.837714 0.507287 -1.991178 0.460706 -0.487619 5.200000
3.660377 0.414949 -2.000000 0.498019 -0.389231 5.200000
3.486108 0.316816 -2.000000 0.526056 -0.289226 5.200000
3.314204 0.214598 -2.000000 0.545451 -0.189233 5.200000
3.143864 0.109782 -1.999952 0.556541 -0.089228 5.200000
2.974701 0.003999 -1.972670 0.559442 0.010773 5.200000
2.810467 -0.098503 -1.898050 0.555088 0.110769 5.200000
2.651822 -0.195705 -1.823055 0.543062 0.210773 5.200000
2.498148 -0.286623 -1.748049 0.524179 0.310767 5.200000
2.349038 -0.370422 -1.673054 0.498571 0.410771 5.200000
2.204207 -0.446408 -1.598051 0.466343 0.510772 5.200000
2.063421 -0.514000 -1.525697 0.427649 0.593400 5.200000
1.926233 -0.573219 -1.456625 0.387539 0.593400 5.200000
1.793862 -0.624349 -1.381627 0.349566 0.593400 5.200000
1.666779 -0.668095 -1.306618 0.313586 0.593400 5.200000
1.545415 -0.705187 -1.231621 0.279612 0.593400 5.200000
1.430133 -0.736306 -1.156623 0.247651 0.593400 5.200000
1.321234 -0.762112 -1.081625 0.217696 0.593400 5.200000
1.218985 -0.783240 -1.006626 0.189755 0.593400 5.200000
1.123588 -0.800276 -0.931619 0.163820 0.593400 5.200000
1.035200 -0.813804 -0.856620 0.139879 0.593400 5.200000
0.953973 -0.824332 -0.781622 0.117961 0.593400 5.200000
0.879998 -0.832359 -0.706624 0.098042 0.593400 5.200000
0.813346 -0.838305 -0.631626 0.080134 0.593400 5.200000
0.754090 -0.842591 -0.556622 0.064232 0.593400 5.200000
0.702264 -0.845568 -0.481620 0.050335 0.593400 5.200000
0.657898 -0.847539 -0.406622 0.038449 0.593400 5.200000
0.621008 -0.848776 -0.331624 0.028568 0.593400 5.200000
0.591603 -0.849499 -0.256626 0.020697 0.593400 5.200000
0.569701 -0.849891 -0.181628 0.014823 0.591521 5.200000
0.555293 -0.850070 -0.106619 0.011190 0.514533 5.200000
0.548430 -0.850143 -0.031622 0.009793 0.414541 5.200000
0.548907 -0.850137 0.043376 0.009831 0.314541 5.200000
0.557033 -0.850052 0.118472 0.010685 0.214441 5.200000
0.572443 -0.849883 0.178493 0.011697 0.131186 5.200000
0.586346 -0.849719 0.101100 0.012688 0.234381 5.200000
0.592738 -0.849630 0.026101 0.013407 0.334381 5.200000
0.591540 -0.849647 -0.048897 0.013190 0.434382 5.200000
0.582912 -0.849750 -0.123895 0.011354 0.534382 5.200000
0.566708 -0.849906 -0.191154 0.007147 0.593400 5.200000
0.550503 -0.849986 -0.125629 0.002815 0.593400 5.200000
