# Supplementary material for: Automatic Parking Controller with a Twin Artificial Neural Network Architecture
Source: Hindawi journal article supplement (doi:10.1155/2019/4801985), 2019-01-01
Supplement: f1 [file 4801985.f1.zip › data/data_169.txt]

6.600000 1.000000 0.000000 0.000000 0.000000 5.200000
6.596278 1.000000 -0.074996 0.000027 -0.009842 5.200000
6.585020 1.000000 -0.150004 0.000192 -0.029353 5.200000
6.566241 0.999994 -0.225001 0.000619 -0.050176 5.200000
6.540012 0.999963 -0.299997 0.001417 -0.070864 5.200000
6.506244 0.999892 -0.375003 0.002740 -0.091402 5.200000
6.465005 0.999742 -0.450001 0.004684 -0.111748 5.200000
6.416245 0.999450 -0.524998 0.007371 -0.131839 5.200000
6.360003 0.998941 -0.600000 0.010930 -0.151648 5.200000
6.296262 0.998100 -0.675002 0.015483 -0.171125 5.200000
6.225014 0.996800 -0.749999 0.021124 -0.190227 5.200000
6.146302 0.994871 -0.824997 0.027971 -0.208935 5.200000
6.060083 0.992117 -0.900003 0.036141 -0.227229 5.200000
5.966418 0.988287 -0.974999 0.045729 -0.245114 5.200000
5.865300 0.983107 -1.050006 0.056858 -0.262640 5.200000
5.756770 0.976242 -1.125003 0.069604 -0.279878 5.200000
5.640859 0.967333 -1.200000 0.084102 -0.296979 5.200000
5.517631 0.955936 -1.275003 0.100455 -0.314052 5.200000
5.387174 0.941590 -1.350004 0.118867 -0.333548 5.200000
5.249579 0.923714 -1.425001 0.139775 -0.358484 5.200000
5.105014 0.901656 -1.500000 0.163471 -0.383207 5.200000
4.953657 0.874632 -1.575004 0.190159 -0.407920 5.200000
4.795782 0.841838 -1.650001 0.220045 -0.432206 5.200000
4.631735 0.802296 -1.724998 0.253472 -0.468100 5.200000
4.461994 0.754864 -1.800005 0.292394 -0.526588 5.200000
4.287300 0.697987 -1.875002 0.337925 -0.555986 5.200000
4.108502 0.630101 -1.950991 0.388192 -0.577728 5.200000
3.927021 0.550421 -2.000000 0.438383 -0.529853 5.200000
3.747802 0.461515 -2.000000 0.480765 -0.438933 5.200000
3.572086 0.366034 -2.000000 0.513282 -0.338760 5.200000
3.399105 0.265650 -2.000000 0.536888 -0.238759 5.200000
3.228094 0.161937 -2.000000 0.552093 -0.138758 5.200000
3.058272 0.056349 -1.999406 0.559025 -0.038757 5.200000
2.891060 -0.048341 -1.935864 0.558256 0.061237 5.200000
2.729738 -0.148277 -1.860196 0.549912 0.161235 5.200000
2.573667 -0.242433 -1.785200 0.534369 0.261237 5.200000
2.422337 -0.329848 -1.710203 0.512092 0.361238 5.200000
2.275418 -0.409794 -1.635196 0.483128 0.461239 5.200000
2.132729 -0.481544 -1.559432 0.447470 0.569167 5.200000
1.993609 -0.544947 -1.494485 0.407104 0.593400 5.200000
1.858798 -0.599993 -1.418773 0.368121 0.593400 5.200000
1.729029 -0.647302 -1.343774 0.331156 0.593400 5.200000
1.604781 -0.687607 -1.268767 0.296188 0.593400 5.200000
1.486446 -0.721603 -1.193769 0.263235 0.593400 5.200000
1.374358 -0.749957 -1.118771 0.232287 0.593400 5.200000
1.268783 -0.773324 -1.043773 0.203344 0.593400 5.200000
1.169968 -0.792309 -0.968775 0.176415 0.593400 5.200000
1.078091 -0.807510 -0.893767 0.151482 0.593400 5.200000
0.993307 -0.819464 -0.818769 0.128562 0.593400 5.200000
0.915722 -0.828668 -0.743771 0.107658 0.593400 5.200000
0.845440 -0.835591 -0.668773 0.088749 0.593400 5.200000
0.782513 -0.840655 -0.593775 0.071855 0.593400 5.200000
0.727006 -0.844240 -0.518766 0.056966 0.593400 5.200000
0.678936 -0.846668 -0.443769 0.044089 0.593400 5.200000
0.638346 -0.848242 -0.368770 0.033208 0.593400 5.200000
0.605231 -0.849191 -0.293772 0.024345 0.593400 5.200000
0.579611 -0.849731 -0.218774 0.017485 0.593400 5.200000
0.561488 -0.850000 -0.143773 0.012668 0.568719 5.200000
0.550865 -0.850120 -0.068768 0.010253 0.464069 5.200000
0.547768 -0.850149 0.006230 0.009678 0.364067 5.200000
0.552082 -0.850114 0.081228 0.010209 0.264066 5.200000
0.563970 -0.849981 0.155650 0.011206 0.164543 5.200000
0.580409 -0.849786 0.138246 0.012198 0.184845 5.200000
0.590496 -0.849660 0.063248 0.013130 0.284846 5.200000
0.593029 -0.849630 -0.011750 0.013450 0.384847 5.200000
0.588124 -0.849694 -0.086748 0.012513 0.484847 5.200000
0.575705 -0.849826 -0.162728 0.009544 0.590792 5.200000
0.557674 -0.849962 -0.164247 0.004735 0.593400 5.200000
0.545114 -0.849999 -0.087778 0.001366 0.593400 5.200000
