# Supplementary material for: Automatic Parking Controller with a Twin Artificial Neural Network Architecture
Source: Hindawi journal article supplement (doi:10.1155/2019/4801985), 2019-01-01
Supplement: f1 [file 4801985.f1.zip › data/data_170.txt]

6.700000 1.000000 0.000000 0.000000 0.000000 5.200000
6.696285 1.000000 -0.075001 0.000027 -0.007811 5.200000
6.685015 1.000000 -0.150000 0.000163 -0.023286 5.200000
6.666247 0.999995 -0.225002 0.000532 -0.041127 5.200000
6.640011 0.999965 -0.300001 0.001231 -0.058827 5.200000
6.606241 0.999906 -0.375004 0.002358 -0.076443 5.200000
6.565010 0.999780 -0.450001 0.004029 -0.093943 5.200000
6.516242 0.999530 -0.524996 0.006344 -0.111303 5.200000
6.460007 0.999084 -0.600002 0.009405 -0.128522 5.200000
6.396250 0.998372 -0.674996 0.013317 -0.145572 5.200000
6.325020 0.997252 -0.750002 0.018172 -0.162451 5.200000
6.246283 0.995587 -0.824997 0.024089 -0.179174 5.200000
6.160064 0.993211 -0.900003 0.031162 -0.195771 5.200000
6.066373 0.989910 -0.974998 0.039491 -0.212300 5.200000
5.965225 0.985425 -1.050003 0.049179 -0.228835 5.200000
5.856638 0.979484 -1.124999 0.060358 -0.245507 5.200000
5.740638 0.971741 -1.200003 0.073138 -0.262523 5.200000
5.617298 0.961818 -1.274998 0.087664 -0.280403 5.200000
5.486646 0.949258 -1.350002 0.104265 -0.303641 5.200000
5.348795 0.933530 -1.424998 0.123307 -0.328385 5.200000
5.203854 0.913993 -1.500003 0.144998 -0.353110 5.200000
5.052012 0.889945 -1.574998 0.169543 -0.377656 5.200000
4.893459 0.860578 -1.650004 0.197164 -0.405962 5.200000
4.728513 0.824964 -1.724998 0.228748 -0.452642 5.200000
4.557631 0.781863 -1.800004 0.266454 -0.526081 5.200000
4.381502 0.729517 -1.874999 0.311728 -0.550147 5.200000
4.200977 0.666430 -1.950947 0.361367 -0.573763 5.200000
4.017439 0.591459 -1.997435 0.413808 -0.565147 5.200000
3.836314 0.506616 -2.000000 0.461021 -0.489624 5.200000
3.658979 0.414162 -2.000000 0.498296 -0.388447 5.200000
3.484720 0.316020 -2.000000 0.526232 -0.288455 5.200000
3.312839 0.213766 -2.000000 0.545573 -0.188450 5.200000
3.142487 0.108923 -2.000000 0.556672 -0.088451 5.200000
2.973356 0.003163 -1.972558 0.559680 0.011548 5.200000
2.809208 -0.099286 -1.897469 0.554993 0.111552 5.200000
2.650604 -0.196433 -1.822469 0.542966 0.211545 5.200000
2.496968 -0.287313 -1.747467 0.523990 0.311549 5.200000
2.347883 -0.371038 -1.672469 0.498354 0.411552 5.200000
2.203087 -0.446972 -1.597466 0.466066 0.511547 5.200000
2.062333 -0.514497 -1.525265 0.427330 0.593400 5.200000
1.925181 -0.573648 -1.456040 0.387235 0.593400 5.200000
1.792850 -0.624718 -1.381042 0.349278 0.593400 5.200000
1.665810 -0.668409 -1.306033 0.313313 0.593400 5.200000
1.544492 -0.705452 -1.231036 0.279355 0.593400 5.200000
1.429259 -0.736527 -1.156038 0.247410 0.593400 5.200000
1.320411 -0.762294 -1.081040 0.217470 0.593400 5.200000
1.218214 -0.783387 -1.006041 0.189545 0.593400 5.200000
1.122871 -0.800394 -0.931034 0.163625 0.593400 5.200000
1.034539 -0.813897 -0.856035 0.139700 0.593400 5.200000
0.953368 -0.824403 -0.781037 0.117798 0.593400 5.200000
0.879450 -0.832413 -0.706039 0.097895 0.593400 5.200000
0.812855 -0.838344 -0.631041 0.080002 0.593400 5.200000
0.753657 -0.842619 -0.556036 0.064116 0.593400 5.200000
0.701889 -0.845586 -0.481035 0.050234 0.593400 5.200000
0.657581 -0.847552 -0.406037 0.038364 0.593400 5.200000
0.620749 -0.848783 -0.331039 0.028499 0.593400 5.200000
0.591403 -0.849503 -0.256041 0.020643 0.593400 5.200000
0.569559 -0.849893 -0.181043 0.014784 0.591363 5.200000
0.555209 -0.850071 -0.106034 0.011171 0.513753 5.200000
0.548406 -0.850144 -0.031037 0.009789 0.413761 5.200000
0.548939 -0.850137 0.043961 0.009836 0.313761 5.200000
0.557125 -0.850051 0.119079 0.010693 0.213638 5.200000
0.572572 -0.849881 0.178318 0.011705 0.131420 5.200000
0.586423 -0.849718 0.100515 0.012695 0.235161 5.200000
0.592748 -0.849630 0.025516 0.013408 0.335161 5.200000
0.591504 -0.849648 -0.049482 0.013183 0.435162 5.200000
0.582815 -0.849751 -0.124480 0.011332 0.535162 5.200000
0.566561 -0.849907 -0.191380 0.007108 0.593400 5.200000
0.550405 -0.849986 -0.125044 0.002788 0.593400 5.200000
