# Supplementary material for: Automatic Parking Controller with a Twin Artificial Neural Network Architecture
Source: Hindawi journal article supplement (doi:10.1155/2019/4801985), 2019-01-01
Supplement: f1 [file 4801985.f1.zip › data/data_171.txt]

6.800000 1.000000 0.000000 0.000000 0.000000 5.200000
6.796293 1.000000 -0.074998 0.000022 -0.006085 5.200000
6.785013 1.000000 -0.149996 0.000147 -0.017886 5.200000
6.766251 0.999995 -0.224998 0.000457 -0.033052 5.200000
6.740015 0.999978 -0.300001 0.001051 -0.048099 5.200000
6.706243 0.999921 -0.375000 0.002021 -0.063125 5.200000
6.665010 0.999815 -0.449998 0.003450 -0.078128 5.200000
6.616243 0.999594 -0.524999 0.005431 -0.093099 5.200000
6.560007 0.999218 -0.600002 0.008049 -0.108044 5.200000
6.496251 0.998600 -0.675003 0.011406 -0.122984 5.200000
6.425017 0.997647 -0.750000 0.015586 -0.137941 5.200000
6.346272 0.996222 -0.825000 0.020681 -0.152941 5.200000
6.260055 0.994182 -0.900004 0.026791 -0.168052 5.200000
6.166336 0.991334 -0.974995 0.034029 -0.183335 5.200000
6.065165 0.987468 -1.049999 0.042480 -0.198928 5.200000
5.956539 0.982330 -1.125001 0.052280 -0.214967 5.200000
5.840484 0.975607 -1.199998 0.063548 -0.231649 5.200000
5.717038 0.966970 -1.274997 0.076459 -0.249558 5.200000
5.586251 0.955981 -1.350000 0.091368 -0.273797 5.200000
5.448193 0.942161 -1.425002 0.108601 -0.298535 5.200000
5.302965 0.924896 -1.500000 0.128354 -0.323258 5.200000
5.150708 0.903537 -1.574998 0.150822 -0.348045 5.200000
4.991609 0.877308 -1.650000 0.176295 -0.380912 5.200000
4.825928 0.845318 -1.725004 0.205918 -0.429285 5.200000
4.654056 0.806310 -1.800003 0.241541 -0.507952 5.200000
4.476648 0.758540 -1.874999 0.285551 -0.543982 5.200000
4.294505 0.700222 -1.951343 0.334624 -0.570297 5.200000
4.109033 0.630251 -1.999746 0.387285 -0.576904 5.200000
3.925866 0.549858 -2.000000 0.438726 -0.537336 5.200000
3.746727 0.460973 -2.000000 0.480959 -0.438177 5.200000
3.571033 0.365420 -2.000000 0.513471 -0.338180 5.200000
3.398057 0.265036 -2.000000 0.536986 -0.238179 5.200000
3.227071 0.161294 -2.000000 0.552170 -0.138181 5.200000
3.057200 0.055680 -1.996074 0.559000 -0.038179 5.200000
2.890111 -0.048935 -1.934981 0.558184 0.061820 5.200000
2.728825 -0.148848 -1.859764 0.549836 0.161822 5.200000
2.572782 -0.242961 -1.784761 0.534266 0.261822 5.200000
2.421473 -0.330341 -1.709764 0.511937 0.361816 5.200000
2.274573 -0.410230 -1.634766 0.482950 0.461823 5.200000
2.131915 -0.481934 -1.558940 0.447236 0.570294 5.200000
1.992813 -0.545290 -1.494050 0.406872 0.593400 5.200000
1.858031 -0.600289 -1.418338 0.367901 0.593400 5.200000
1.728292 -0.647555 -1.343338 0.330947 0.593400 5.200000
1.604078 -0.687822 -1.268332 0.295991 0.593400 5.200000
1.485777 -0.721782 -1.193334 0.263050 0.593400 5.200000
1.373727 -0.750107 -1.118336 0.232114 0.593400 5.200000
1.268190 -0.773446 -1.043338 0.203182 0.593400 5.200000
1.169416 -0.792407 -0.968340 0.176265 0.593400 5.200000
1.077579 -0.807588 -0.893332 0.151343 0.593400 5.200000
0.992836 -0.819525 -0.818334 0.128434 0.593400 5.200000
0.915293 -0.828714 -0.743336 0.107543 0.593400 5.200000
0.845053 -0.835625 -0.668338 0.088645 0.593400 5.200000
0.782170 -0.840680 -0.593340 0.071763 0.593400 5.200000
0.726705 -0.844257 -0.518331 0.056886 0.593400 5.200000
0.678678 -0.846679 -0.443334 0.044020 0.593400 5.200000
0.638132 -0.848249 -0.368336 0.033151 0.593400 5.200000
0.605060 -0.849195 -0.293337 0.024299 0.593400 5.200000
0.579484 -0.849733 -0.218339 0.017451 0.593400 5.200000
0.561404 -0.850001 -0.143338 0.012647 0.568138 5.200000
0.550824 -0.850121 -0.068333 0.010245 0.463489 5.200000
0.547774 -0.850149 0.006665 0.009679 0.363487 5.200000
0.552129 -0.850113 0.081663 0.010215 0.263486 5.200000
0.564062 -0.849980 0.156042 0.011212 0.163984 5.200000
0.580488 -0.849785 0.137811 0.012203 0.185425 5.200000
0.590530 -0.849660 0.062813 0.013133 0.285426 5.200000
0.593029 -0.849630 -0.012185 0.013450 0.385427 5.200000
0.588075 -0.849694 -0.087183 0.012503 0.485427 5.200000
0.575612 -0.849827 -0.163121 0.009519 0.591120 5.200000
0.557578 -0.849963 -0.163685 0.004709 0.593400 5.200000
0.545063 -0.849999 -0.087343 0.001353 0.593400 5.200000
