# Supplementary material for: Automatic Parking Controller with a Twin Artificial Neural Network Architecture
Source: Hindawi journal article supplement (doi:10.1155/2019/4801985), 2019-01-01
Supplement: f1 [file 4801985.f1.zip › data/data_172.txt]

6.900000 1.000000 0.000000 0.000000 0.000000 5.200000
6.896302 1.000000 -0.075000 0.000014 -0.004683 5.200000
6.885004 1.000000 -0.149999 0.000122 -0.013231 5.200000
6.866252 0.999996 -0.224999 0.000398 -0.025904 5.200000
6.840005 0.999980 -0.299999 0.000902 -0.038617 5.200000
6.806250 0.999931 -0.375004 0.001722 -0.051365 5.200000
6.765007 0.999837 -0.449998 0.002940 -0.064169 5.200000
6.716247 0.999660 -0.525004 0.004623 -0.077036 5.200000
6.660001 0.999335 -0.599997 0.006864 -0.089995 5.200000
6.596256 0.998808 -0.675003 0.009730 -0.103078 5.200000
6.525015 0.997994 -0.749997 0.013314 -0.116322 5.200000
6.446270 0.996774 -0.825003 0.017692 -0.129787 5.200000
6.360040 0.995026 -0.899996 0.022970 -0.143528 5.200000
6.266317 0.992586 -0.975002 0.029235 -0.157657 5.200000
6.165129 0.989262 -1.049996 0.036606 -0.172294 5.200000
6.056461 0.984817 -1.125001 0.045195 -0.187604 5.200000
5.940365 0.979003 -1.200005 0.055131 -0.203789 5.200000
5.816839 0.971485 -1.275000 0.066584 -0.221430 5.200000
5.685944 0.961907 -1.350004 0.079887 -0.244960 5.200000
5.547719 0.949781 -1.424999 0.095410 -0.269679 5.200000
5.402266 0.934567 -1.500003 0.113326 -0.294403 5.200000
5.249683 0.915642 -1.574998 0.133827 -0.318861 5.200000
5.090143 0.892301 -1.650003 0.157224 -0.353246 5.200000
4.923845 0.863652 -1.724998 0.184615 -0.399510 5.200000
4.751144 0.828534 -1.800002 0.217625 -0.473062 5.200000
4.572573 0.785219 -1.874997 0.259627 -0.540215 5.200000
4.388987 0.731708 -1.950932 0.308319 -0.564675 5.200000
4.201729 0.666608 -1.998907 0.360756 -0.572754 5.200000
4.016522 0.591084 -2.000000 0.413798 -0.575921 5.200000
3.835456 0.506162 -2.000000 0.461243 -0.488774 5.200000
3.658116 0.413725 -2.000000 0.498424 -0.387952 5.200000
3.483893 0.315526 -2.000000 0.526381 -0.287953 5.200000
3.312001 0.213282 -2.000000 0.545602 -0.187949 5.200000
3.141687 0.108417 -2.000000 0.556748 -0.087951 5.200000
2.972557 0.002674 -1.975625 0.559603 0.012052 5.200000
2.808406 -0.099791 -1.897095 0.554905 0.112050 5.200000
2.649820 -0.196902 -1.822090 0.542903 0.212045 5.200000
2.496215 -0.287750 -1.747094 0.523875 0.312053 5.200000
2.347148 -0.371441 -1.672091 0.498207 0.412048 5.200000
2.202377 -0.447328 -1.597095 0.465888 0.512047 5.200000
2.061635 -0.514816 -1.524990 0.427127 0.593400 5.200000
1.924507 -0.573923 -1.455665 0.387040 0.593400 5.200000
1.792201 -0.624954 -1.380667 0.349093 0.593400 5.200000
1.665189 -0.668610 -1.305658 0.313138 0.593400 5.200000
1.543900 -0.705622 -1.230661 0.279190 0.593400 5.200000
1.428699 -0.736668 -1.155663 0.247255 0.593400 5.200000
1.319883 -0.762410 -1.080665 0.217326 0.593400 5.200000
1.217720 -0.783482 -1.005666 0.189411 0.593400 5.200000
1.122412 -0.800470 -0.930659 0.163501 0.593400 5.200000
1.034115 -0.813957 -0.855660 0.139585 0.593400 5.200000
0.952980 -0.824449 -0.780662 0.117694 0.593400 5.200000
0.879099 -0.832448 -0.705664 0.097800 0.593400 5.200000
0.812541 -0.838369 -0.630666 0.079917 0.593400 5.200000
0.753379 -0.842637 -0.555661 0.064042 0.593400 5.200000
0.701649 -0.845598 -0.480660 0.050170 0.593400 5.200000
0.657378 -0.847559 -0.405662 0.038309 0.593400 5.200000
0.620583 -0.848788 -0.330664 0.028454 0.593400 5.200000
0.591274 -0.849506 -0.255666 0.020609 0.593400 5.200000
0.569468 -0.849895 -0.180668 0.014760 0.591259 5.200000
0.555155 -0.850072 -0.105659 0.011159 0.513253 5.200000
0.548391 -0.850144 -0.030662 0.009786 0.413261 5.200000
0.548960 -0.850137 0.044336 0.009838 0.313261 5.200000
0.557184 -0.850050 0.119470 0.010698 0.213122 5.200000
0.572655 -0.849880 0.178189 0.011709 0.131591 5.200000
0.586471 -0.849717 0.100140 0.012700 0.235661 5.200000
0.592753 -0.849630 0.025141 0.013409 0.335661 5.200000
0.591481 -0.849648 -0.049857 0.013179 0.435662 5.200000
0.582753 -0.849752 -0.124855 0.011317 0.535662 5.200000
0.566467 -0.849908 -0.191518 0.007082 0.593400 5.200000
0.550343 -0.849987 -0.124669 0.002772 0.593400 5.200000
