# Supplementary material for: Automatic Parking Controller with a Twin Artificial Neural Network Architecture
Source: Hindawi journal article supplement (doi:10.1155/2019/4801985), 2019-01-01
Supplement: f1 [file 4801985.f1.zip › data/data_173.txt]

7.000000 1.000000 0.000000 0.000000 0.000000 5.200000
6.996309 1.000000 -0.075001 0.000009 -0.003616 5.200000
6.984999 1.000000 -0.150001 0.000108 -0.009656 5.200000
6.966260 0.999997 -0.225002 0.000330 -0.019481 5.200000
6.939993 0.999981 -0.300002 0.000763 -0.030167 5.200000
6.906256 0.999945 -0.375003 0.001458 -0.040898 5.200000
6.864997 0.999865 -0.450003 0.002483 -0.051749 5.200000
6.816258 0.999707 -0.525004 0.003914 -0.062758 5.200000
6.760000 0.999442 -0.600004 0.005805 -0.073955 5.200000
6.696259 0.998989 -0.675005 0.008243 -0.085397 5.200000
6.625003 0.998296 -0.750006 0.011294 -0.097122 5.200000
6.546266 0.997264 -0.824995 0.015048 -0.109200 5.200000
6.460023 0.995777 -0.899997 0.019592 -0.121714 5.200000
6.366302 0.993690 -0.974997 0.025005 -0.134768 5.200000
6.265081 0.990844 -1.049998 0.031417 -0.148504 5.200000
6.156410 0.987031 -1.124998 0.038924 -0.163062 5.200000
6.040260 0.982003 -1.199999 0.047674 -0.178678 5.200000
5.916688 0.975489 -1.274999 0.057829 -0.195722 5.200000
5.785699 0.967138 -1.350000 0.069687 -0.218022 5.200000
5.647364 0.956545 -1.425001 0.083628 -0.242784 5.200000
5.501716 0.943160 -1.500001 0.099864 -0.267506 5.200000
5.348894 0.926433 -1.575002 0.118564 -0.292547 5.200000
5.188979 0.905675 -1.650002 0.140052 -0.325725 5.200000
5.022192 0.880068 -1.725003 0.165315 -0.370494 5.200000
4.848794 0.848496 -1.800003 0.195672 -0.435990 5.200000
4.669262 0.809448 -1.875004 0.234103 -0.527825 5.200000
4.484320 0.760699 -1.951435 0.282030 -0.563131 5.200000
4.295428 0.700607 -1.999527 0.334475 -0.577462 5.200000
4.108285 0.629942 -2.000000 0.387651 -0.576681 5.200000
3.925179 0.549573 -2.000000 0.438928 -0.540743 5.200000
3.746065 0.460606 -2.000000 0.481129 -0.437768 5.200000
3.570377 0.365079 -2.000000 0.513555 -0.337774 5.200000
3.397424 0.264639 -2.000000 0.537099 -0.237767 5.200000
3.226419 0.160917 -2.000000 0.552143 -0.137772 5.200000
3.056443 0.055198 -1.994903 0.559178 -0.037772 5.200000
2.889428 -0.049349 -1.934524 0.558299 0.062230 5.200000
2.728172 -0.149250 -1.859460 0.549770 0.162229 5.200000
2.572152 -0.243329 -1.784459 0.534204 0.262231 5.200000
2.420863 -0.330684 -1.709459 0.511826 0.362231 5.200000
2.273982 -0.410540 -1.634458 0.482813 0.462232 5.200000
2.131343 -0.482207 -1.558585 0.447071 0.571185 5.200000
1.992251 -0.545532 -1.493743 0.406708 0.593400 5.200000
1.857488 -0.600498 -1.418031 0.367745 0.593400 5.200000
1.727771 -0.647734 -1.343031 0.330800 0.593400 5.200000
1.603580 -0.687973 -1.268025 0.295852 0.593400 5.200000
1.485305 -0.721910 -1.193027 0.262919 0.593400 5.200000
1.373281 -0.750212 -1.118029 0.231991 0.593400 5.200000
1.267771 -0.773532 -1.043031 0.203067 0.593400 5.200000
1.169025 -0.792476 -0.968033 0.176158 0.593400 5.200000
1.077217 -0.807643 -0.893024 0.151245 0.593400 5.200000
0.992504 -0.819567 -0.818026 0.128345 0.593400 5.200000
0.914990 -0.828747 -0.743028 0.107461 0.593400 5.200000
0.844780 -0.835650 -0.668030 0.088571 0.593400 5.200000
0.781927 -0.840697 -0.593033 0.071698 0.593400 5.200000
0.726493 -0.844270 -0.518024 0.056829 0.593400 5.200000
0.678497 -0.846687 -0.443026 0.043972 0.593400 5.200000
0.637981 -0.848254 -0.368028 0.033111 0.593400 5.200000
0.604940 -0.849198 -0.293030 0.024267 0.593400 5.200000
0.579395 -0.849735 -0.218032 0.017427 0.593400 5.200000
0.561345 -0.850002 -0.143031 0.012632 0.567723 5.200000
0.550795 -0.850121 -0.068026 0.010239 0.463079 5.200000
0.547778 -0.850149 0.006972 0.009679 0.363077 5.200000
0.552162 -0.850113 0.081970 0.010218 0.263076 5.200000
0.564127 -0.849979 0.156321 0.011216 0.163587 5.200000
0.580544 -0.849784 0.137504 0.012207 0.185835 5.200000
0.590553 -0.849659 0.062506 0.013136 0.285836 5.200000
0.593030 -0.849630 -0.012493 0.013450 0.385837 5.200000
0.588039 -0.849695 -0.087491 0.012496 0.485837 5.200000
0.575546 -0.849828 -0.163397 0.009502 0.591339 5.200000
0.557510 -0.849963 -0.163290 0.004691 0.593400 5.200000
0.545028 -0.849999 -0.087035 0.001343 0.593400 5.200000
