# Supplementary material for: Automatic Parking Controller with a Twin Artificial Neural Network Architecture
Source: Hindawi journal article supplement (doi:10.1155/2019/4801985), 2019-01-01
Supplement: f1 [file 4801985.f1.zip › data/data_174.txt]

7.100000 1.000000 -0.000000 0.000000 0.000000 5.200000
7.096317 1.000000 -0.075000 0.000009 -0.002862 5.200000
7.084990 1.000000 -0.150000 0.000085 -0.006914 5.200000
7.066263 0.999997 -0.225000 0.000278 -0.013821 5.200000
7.039986 0.999981 -0.300001 0.000642 -0.022661 5.200000
7.006261 0.999951 -0.374999 0.001223 -0.031599 5.200000
6.964989 0.999882 -0.450001 0.002085 -0.040725 5.200000
6.916259 0.999758 -0.524999 0.003276 -0.050075 5.200000
6.859991 0.999528 -0.600002 0.004870 -0.059707 5.200000
6.796255 0.999159 -0.674999 0.006928 -0.069688 5.200000
6.724998 0.998570 -0.750003 0.009515 -0.080054 5.200000
6.646261 0.997700 -0.824999 0.012708 -0.090899 5.200000
6.560014 0.996436 -0.900003 0.016593 -0.102310 5.200000
6.466285 0.994673 -0.974999 0.021267 -0.114382 5.200000
6.365060 0.992240 -1.050004 0.026816 -0.127260 5.200000
6.256366 0.988976 -1.124999 0.033376 -0.141099 5.200000
6.140197 0.984657 -1.200004 0.041077 -0.156113 5.200000
6.016572 0.979038 -1.274999 0.050077 -0.172511 5.200000
5.885527 0.971788 -1.350005 0.060627 -0.193117 5.200000
5.747084 0.962539 -1.424999 0.073138 -0.218039 5.200000
5.601305 0.950808 -1.500005 0.087852 -0.242762 5.200000
5.448262 0.936031 -1.574999 0.104925 -0.267331 5.200000
5.288078 0.917596 -1.650006 0.124660 -0.299517 5.200000
5.120880 0.894722 -1.725000 0.147904 -0.342401 5.200000
4.946935 0.866385 -1.799998 0.175870 -0.399778 5.200000
4.766587 0.831194 -1.875001 0.210818 -0.493636 5.200000
4.580504 0.787106 -1.951346 0.255869 -0.554422 5.200000
4.390071 0.731996 -1.998258 0.307835 -0.576186 5.200000
4.201131 0.666382 -2.000000 0.360858 -0.571326 5.200000
4.015974 0.590801 -2.000000 0.414096 -0.571259 5.200000
3.834903 0.505911 -2.000000 0.461347 -0.487658 5.200000
3.657589 0.413417 -2.000000 0.498544 -0.387664 5.200000
3.483356 0.315231 -2.000000 0.526420 -0.287660 5.200000
3.311490 0.212953 -2.000000 0.545686 -0.187656 5.200000
3.141180 0.108103 -2.000000 0.556688 -0.087663 5.200000
2.972117 0.002390 -1.972951 0.559392 0.012340 5.200000
2.807933 -0.100078 -1.896887 0.554873 0.112344 5.200000
2.649368 -0.197177 -1.821877 0.542850 0.212336 5.200000
2.495771 -0.288002 -1.746872 0.523806 0.312340 5.200000
2.346727 -0.371676 -1.671877 0.498124 0.412341 5.200000
2.201962 -0.447539 -1.596873 0.465778 0.512337 5.200000
2.061230 -0.515001 -1.524831 0.427010 0.593400 5.200000
1.924117 -0.574083 -1.455447 0.386927 0.593400 5.200000
1.791824 -0.625091 -1.380450 0.348986 0.593400 5.200000
1.664828 -0.668727 -1.305441 0.313037 0.593400 5.200000
1.543557 -0.705720 -1.230443 0.279095 0.593400 5.200000
1.428374 -0.736750 -1.155445 0.247166 0.593400 5.200000
1.319577 -0.762478 -1.080447 0.217242 0.593400 5.200000
1.217434 -0.783537 -1.005449 0.189333 0.593400 5.200000
1.122146 -0.800514 -0.930441 0.163429 0.593400 5.200000
1.033869 -0.813991 -0.855443 0.139519 0.593400 5.200000
0.952756 -0.824476 -0.780445 0.117633 0.593400 5.200000
0.878895 -0.832468 -0.705447 0.097745 0.593400 5.200000
0.812359 -0.838384 -0.630449 0.079869 0.593400 5.200000
0.753218 -0.842647 -0.555444 0.063999 0.593400 5.200000
0.701509 -0.845605 -0.480443 0.050133 0.593400 5.200000
0.657261 -0.847564 -0.405445 0.038278 0.593400 5.200000
0.620487 -0.848791 -0.330446 0.028429 0.593400 5.200000
0.591200 -0.849507 -0.255448 0.020589 0.593400 5.200000
0.569415 -0.849895 -0.180451 0.014746 0.591198 5.200000
0.555124 -0.850072 -0.105442 0.011152 0.512963 5.200000
0.548383 -0.850144 -0.030444 0.009785 0.412971 5.200000
0.548973 -0.850137 0.044554 0.009840 0.312971 5.200000
0.557219 -0.850050 0.119696 0.010701 0.212822 5.200000
0.572704 -0.849880 0.178108 0.011712 0.131699 5.200000
0.586500 -0.849717 0.099922 0.012703 0.235951 5.200000
0.592756 -0.849630 0.024924 0.013409 0.335951 5.200000
0.591467 -0.849648 -0.050074 0.013177 0.435952 5.200000
0.582717 -0.849752 -0.125072 0.011309 0.535952 5.200000
0.566412 -0.849908 -0.191594 0.007068 0.593400 5.200000
0.550306 -0.849987 -0.124452 0.002762 0.593400 5.200000
