# Supplementary material for: Automatic Parking Controller with a Twin Artificial Neural Network Architecture
Source: Hindawi journal article supplement (doi:10.1155/2019/4801985), 2019-01-01
Supplement: f1 [file 4801985.f1.zip › data/data_175.txt]

7.200000 1.000000 0.000000 0.000000 0.000000 5.200000
7.196319 1.000000 -0.074999 0.000005 -0.002274 5.200000
7.184979 1.000000 -0.149997 0.000073 -0.004623 5.200000
7.166270 0.999998 -0.225001 0.000229 -0.009132 5.200000
7.139991 0.999982 -0.299996 0.000528 -0.015796 5.200000
7.106265 0.999965 -0.374998 0.001012 -0.023113 5.200000
7.064989 0.999907 -0.450003 0.001721 -0.030662 5.200000
7.016261 0.999794 -0.524995 0.002698 -0.038510 5.200000
6.959996 0.999607 -0.599999 0.004021 -0.046721 5.200000
6.896252 0.999302 -0.675002 0.005724 -0.055359 5.200000
6.825004 0.998819 -0.749996 0.007889 -0.064488 5.200000
6.746260 0.998094 -0.825000 0.010582 -0.074199 5.200000
6.660017 0.997041 -0.899999 0.013870 -0.084584 5.200000
6.566276 0.995563 -0.974997 0.017862 -0.095742 5.200000
6.465048 0.993514 -1.050001 0.022644 -0.107816 5.200000
6.356328 0.990748 -1.124996 0.028338 -0.120965 5.200000
6.240148 0.987075 -1.199998 0.035077 -0.135379 5.200000
6.116485 0.982256 -1.275002 0.043020 -0.151240 5.200000
5.985383 0.976011 -1.349995 0.052383 -0.170140 5.200000
5.846866 0.967993 -1.424999 0.063592 -0.195098 5.200000
5.700975 0.957756 -1.500002 0.076901 -0.219818 5.200000
5.547775 0.944765 -1.574996 0.092494 -0.244200 5.200000
5.387360 0.928453 -1.650000 0.110591 -0.275298 5.200000
5.219846 0.908087 -1.725000 0.132008 -0.316144 5.200000
5.045439 0.882694 -1.799997 0.157796 -0.368315 5.200000
4.864448 0.851038 -1.875001 0.189743 -0.451513 5.200000
4.677381 0.811206 -1.951100 0.231328 -0.535808 5.200000
4.485642 0.761041 -2.000000 0.281504 -0.564418 5.200000
4.295001 0.700394 -2.000000 0.334408 -0.572165 5.200000
4.107910 0.629789 -2.000000 0.387599 -0.577984 5.200000
3.924812 0.549368 -2.000000 0.438964 -0.538757 5.200000
3.745696 0.460424 -2.000000 0.481178 -0.437600 5.200000
3.570015 0.364864 -2.000000 0.513617 -0.337600 5.200000
3.397068 0.264431 -2.000000 0.537123 -0.237600 5.200000
3.226068 0.160698 -2.000000 0.552191 -0.137600 5.200000
3.056161 0.055015 -1.992067 0.559312 -0.037600 5.200000
2.889147 -0.049522 -1.935270 0.558404 0.062400 5.200000
2.727906 -0.149424 -1.859325 0.549719 0.162400 5.200000
2.571888 -0.243478 -1.784333 0.534183 0.262400 5.200000
2.420609 -0.330835 -1.709328 0.511777 0.362400 5.200000
2.273732 -0.410664 -1.634325 0.482767 0.462400 5.200000
2.131105 -0.482315 -1.558416 0.446998 0.571769 5.200000
1.992018 -0.545632 -1.493615 0.406640 0.593400 5.200000
1.857263 -0.600584 -1.417903 0.367681 0.593400 5.200000
1.727555 -0.647808 -1.342903 0.330739 0.593400 5.200000
1.603374 -0.688036 -1.267897 0.295794 0.593400 5.200000
1.485109 -0.721962 -1.192899 0.262865 0.593400 5.200000
1.373096 -0.750256 -1.117901 0.231940 0.593400 5.200000
1.267598 -0.773568 -1.042903 0.203020 0.593400 5.200000
1.168863 -0.792505 -0.967905 0.176114 0.593400 5.200000
1.077067 -0.807666 -0.892897 0.151204 0.593400 5.200000
0.992366 -0.819585 -0.817899 0.128308 0.593400 5.200000
0.914865 -0.828760 -0.742901 0.107428 0.593400 5.200000
0.844667 -0.835660 -0.667903 0.088541 0.593400 5.200000
0.781826 -0.840705 -0.592905 0.071671 0.593400 5.200000
0.726405 -0.844275 -0.517896 0.056805 0.593400 5.200000
0.678421 -0.846691 -0.442899 0.043951 0.593400 5.200000
0.637918 -0.848256 -0.367901 0.033094 0.593400 5.200000
0.604890 -0.849199 -0.292902 0.024253 0.593400 5.200000
0.579357 -0.849735 -0.217904 0.017417 0.593400 5.200000
0.561321 -0.850002 -0.142903 0.012626 0.567549 5.200000
0.550783 -0.850121 -0.067898 0.010237 0.462909 5.200000
0.547780 -0.850149 0.007100 0.009680 0.362907 5.200000
0.552175 -0.850113 0.082098 0.010220 0.262906 5.200000
0.564154 -0.849979 0.156436 0.011218 0.163422 5.200000
0.580567 -0.849784 0.137376 0.012209 0.186005 5.200000
0.590563 -0.849659 0.062378 0.013137 0.286006 5.200000
0.593030 -0.849630 -0.012620 0.013450 0.386007 5.200000
0.588025 -0.849695 -0.087618 0.012492 0.486007 5.200000
0.575518 -0.849828 -0.163511 0.009495 0.591428 5.200000
0.557482 -0.849963 -0.163127 0.004683 0.593400 5.200000
0.545013 -0.849999 -0.086908 0.001339 0.593400 5.200000
