# Supplementary material for: Automatic Parking Controller with a Twin Artificial Neural Network Architecture
Source: Hindawi journal article supplement (doi:10.1155/2019/4801985), 2019-01-01
Supplement: f1 [file 4801985.f1.zip › data/data_176.txt]

6.100000 1.100000 0.000000 0.000000 0.000000 5.200000
6.096252 1.100000 -0.074996 0.000054 -0.037438 5.200000
6.085018 1.099998 -0.150005 0.000379 -0.081567 5.200000
6.066247 1.099980 -0.225001 0.001259 -0.125855 5.200000
6.039996 1.099930 -0.299998 0.002945 -0.170552 5.200000
6.006260 1.099780 -0.374998 0.005734 -0.215786 5.200000
5.965000 1.099461 -0.450003 0.009932 -0.261787 5.200000
5.916256 1.098840 -0.525000 0.015846 -0.308863 5.200000
5.860018 1.097731 -0.599996 0.023848 -0.357527 5.200000
5.796298 1.095885 -0.675004 0.034362 -0.408755 5.200000
5.725100 1.092967 -0.750001 0.047884 -0.464751 5.200000
5.646485 1.088531 -0.824998 0.065161 -0.523058 5.200000
5.560481 1.082024 -0.900005 0.086200 -0.546783 5.200000
5.467181 1.072838 -0.975002 0.110338 -0.573697 5.200000
5.366710 1.060347 -1.049999 0.137190 -0.576191 5.200000
5.259204 1.043913 -1.124996 0.166073 -0.575790 5.200000
5.144871 1.022933 -1.200004 0.196943 -0.575834 5.200000
5.023939 0.996734 -1.275000 0.229818 -0.576814 5.200000
4.896682 0.964616 -1.349998 0.264692 -0.578409 5.200000
4.763460 0.925857 -1.425002 0.301543 -0.578248 5.200000
4.624690 0.879736 -1.500002 0.339955 -0.561633 5.200000
4.480713 0.825807 -1.574999 0.375813 -0.490320 5.200000
4.331733 0.764125 -1.649995 0.408413 -0.435611 5.200000
4.177913 0.694749 -1.725004 0.438310 -0.386483 5.200000
4.019388 0.617716 -1.800000 0.465637 -0.339967 5.200000
3.856265 0.533144 -1.874996 0.490345 -0.294739 5.200000
3.688576 0.441174 -1.951974 0.512320 -0.250146 5.200000
3.516664 0.342253 -1.990887 0.531281 -0.202962 5.200000
3.345090 0.239603 -2.000000 0.546294 -0.153277 5.200000
3.174809 0.134698 -2.000000 0.557237 -0.100405 5.200000
3.005444 0.028456 -1.986426 0.561870 -0.007545 5.200000
2.840392 -0.075225 -1.911734 0.558602 0.092457 5.200000
2.680992 -0.173809 -1.836733 0.547967 0.192461 5.200000
2.526649 -0.266273 -1.761736 0.530300 0.292458 5.200000
2.376914 -0.351767 -1.686740 0.505907 0.392459 5.200000
2.231480 -0.429524 -1.611731 0.474906 0.492460 5.200000
2.090212 -0.498957 -1.536648 0.437226 0.593371 5.200000
1.952352 -0.560037 -1.470562 0.396875 0.593400 5.200000
1.819160 -0.612885 -1.395491 0.358522 0.593400 5.200000
1.691154 -0.658217 -1.320495 0.322173 0.593400 5.200000
1.568780 -0.696738 -1.245493 0.287835 0.593400 5.200000
1.452422 -0.729152 -1.170495 0.255501 0.593400 5.200000
1.342381 -0.756122 -1.095493 0.225180 0.593400 5.200000
1.238934 -0.778282 -1.020498 0.196862 0.593400 5.200000
1.142294 -0.796237 -0.945491 0.170549 0.593400 5.200000
1.052631 -0.810553 -0.870493 0.146245 0.593400 5.200000
0.970089 -0.821774 -0.795496 0.123952 0.593400 5.200000
0.894783 -0.830384 -0.720498 0.103662 0.593400 5.200000
0.826787 -0.836835 -0.645492 0.085383 0.593400 5.200000
0.766167 -0.841523 -0.570496 0.069104 0.593400 5.200000
0.712976 -0.844826 -0.495494 0.054843 0.593400 5.200000
0.667231 -0.847051 -0.420492 0.042582 0.593400 5.200000
0.628962 -0.848485 -0.345496 0.032335 0.593400 5.200000
0.598175 -0.849359 -0.270499 0.024093 0.593400 5.200000
0.574884 -0.849847 -0.195492 0.017851 0.593249 5.200000
0.559081 -0.850089 -0.120495 0.013776 0.528490 5.200000
0.550732 -0.850197 -0.045497 0.012030 0.428493 5.200000
0.550058 -0.850213 0.029510 0.011888 0.328490 5.200000
0.556687 -0.850126 0.104506 0.012611 0.228487 5.200000
0.570996 -0.849939 0.185024 0.013604 0.121129 5.200000
0.588466 -0.849696 0.143679 0.014498 0.170379 5.200000
0.599050 -0.849539 0.068343 0.015423 0.271250 5.200000
0.602085 -0.849491 -0.006653 0.015788 0.371254 5.200000
0.597747 -0.849559 -0.081659 0.014992 0.471257 5.200000
0.585812 -0.849714 -0.156719 0.012230 0.569875 5.200000
0.566721 -0.849906 -0.197866 0.007156 0.593329 5.200000
0.550450 -0.849987 -0.125289 0.002801 0.593400 5.200000
