# Supplementary material for: Automatic Parking Controller with a Twin Artificial Neural Network Architecture
Source: Hindawi journal article supplement (doi:10.1155/2019/4801985), 2019-01-01
Supplement: f1 [file 4801985.f1.zip › data/data_177.txt]

6.200000 1.100000 0.000000 0.000000 0.000000 5.200000
6.196252 1.100000 -0.074998 0.000046 -0.032770 5.200000
6.185026 1.099999 -0.149998 0.000351 -0.073083 5.200000
6.166246 1.099981 -0.225003 0.001154 -0.113355 5.200000
6.139997 1.099935 -0.300000 0.002692 -0.153761 5.200000
6.106263 1.099805 -0.374998 0.005238 -0.194306 5.200000
6.064998 1.099513 -0.449995 0.009029 -0.235049 5.200000
6.016254 1.098945 -0.525003 0.014355 -0.275999 5.200000
5.960018 1.097943 -0.600000 0.021495 -0.317206 5.200000
5.896282 1.096280 -0.674998 0.030750 -0.358726 5.200000
5.825082 1.093687 -0.749995 0.042442 -0.400652 5.200000
5.746438 1.089784 -0.825003 0.056947 -0.443205 5.200000
5.660370 1.084124 -0.900000 0.074647 -0.481085 5.200000
5.566960 1.076180 -0.974998 0.095442 -0.506124 5.200000
5.466291 1.065345 -1.049995 0.119226 -0.530848 5.200000
5.358498 1.050970 -1.125000 0.146237 -0.555562 5.200000
5.243769 1.032306 -1.200001 0.176651 -0.576159 5.200000
5.122320 1.008551 -1.274998 0.209522 -0.575309 5.200000
4.994442 0.979025 -1.349996 0.244420 -0.576162 5.200000
4.860462 0.943014 -1.424995 0.280352 -0.553336 5.200000
4.720660 0.900055 -1.500001 0.315282 -0.511306 5.200000
4.575331 0.849901 -1.574998 0.348771 -0.472522 5.200000
4.424720 0.792348 -1.649996 0.380800 -0.435372 5.200000
4.269052 0.727198 -1.724993 0.411325 -0.399342 5.200000
4.108562 0.654364 -1.800001 0.440249 -0.364183 5.200000
3.943441 0.573767 -1.874998 0.467485 -0.329758 5.200000
3.773843 0.485368 -1.950519 0.492925 -0.296090 5.200000
3.600363 0.389488 -2.000000 0.516294 -0.259830 5.200000
3.427411 0.288922 -2.000000 0.536503 -0.219046 5.200000
3.256373 0.185251 -2.000000 0.552258 -0.152547 5.200000
3.086550 0.079475 -1.998811 0.560628 -0.055520 5.200000
2.918839 -0.026042 -1.947721 0.561092 0.044478 5.200000
2.756805 -0.127220 -1.872719 0.553953 0.144479 5.200000
2.600105 -0.222731 -1.797721 0.539632 0.244481 5.200000
2.448201 -0.311666 -1.722724 0.518432 0.344481 5.200000
2.300736 -0.393219 -1.647716 0.490602 0.444479 5.200000
2.157485 -0.466708 -1.572541 0.456137 0.546347 5.200000
2.017946 -0.531804 -1.506307 0.415991 0.593400 5.200000
1.882444 -0.588518 -1.431480 0.376673 0.593400 5.200000
1.751890 -0.637357 -1.356481 0.339367 0.593400 5.200000
1.626767 -0.679059 -1.281475 0.304061 0.593400 5.200000
1.507482 -0.714321 -1.206479 0.270761 0.593400 5.200000
1.394367 -0.743822 -1.131483 0.239480 0.593400 5.200000
1.287733 -0.768209 -1.056478 0.210199 0.593400 5.200000
1.187799 -0.788108 -0.981478 0.182919 0.593400 5.200000
1.094772 -0.804101 -0.906482 0.157660 0.593400 5.200000
1.008793 -0.816749 -0.831475 0.134393 0.593400 5.200000
0.930006 -0.826556 -0.756477 0.113146 0.593400 5.200000
0.858489 -0.833982 -0.681481 0.093902 0.593400 5.200000
0.794331 -0.839466 -0.606482 0.076661 0.593400 5.200000
0.737570 -0.843394 -0.531476 0.061438 0.593400 5.200000
0.688243 -0.846101 -0.456481 0.048211 0.593400 5.200000
0.646392 -0.847879 -0.381477 0.037004 0.593400 5.200000
0.612013 -0.848997 -0.306479 0.027797 0.593400 5.200000
0.585123 -0.849648 -0.231480 0.020599 0.593400 5.200000
0.565727 -0.850000 -0.156483 0.015413 0.578633 5.200000
0.553824 -0.850159 -0.081476 0.012621 0.476474 5.200000
0.549427 -0.850219 -0.006479 0.011805 0.376472 5.200000
0.552545 -0.850182 0.068520 0.012190 0.276469 5.200000
0.563136 -0.850044 0.143518 0.013138 0.176465 5.200000
0.580614 -0.849806 0.181369 0.014057 0.123283 5.200000
0.594912 -0.849600 0.104332 0.015010 0.223275 5.200000
0.601533 -0.849500 0.029328 0.015717 0.323273 5.200000
0.600839 -0.849507 -0.045672 0.015581 0.423275 5.200000
0.592476 -0.849631 -0.120668 0.013853 0.523762 5.200000
0.576649 -0.849823 -0.194675 0.009800 0.583216 5.200000
0.557335 -0.849957 -0.161483 0.004637 0.593400 5.200000
0.544939 -0.850000 -0.086270 0.001323 0.593400 5.200000
