# Supplementary material for: Automatic Parking Controller with a Twin Artificial Neural Network Architecture
Source: Hindawi journal article supplement (doi:10.1155/2019/4801985), 2019-01-01
Supplement: f1 [file 4801985.f1.zip › data/data_178.txt]

6.300000 1.100000 0.000000 0.000000 0.000000 5.200000
6.296260 1.100000 -0.075001 0.000044 -0.029563 5.200000
6.285029 1.099999 -0.150000 0.000327 -0.067330 5.200000
6.266243 1.099982 -0.225004 0.001083 -0.104937 5.200000
6.240002 1.099940 -0.299999 0.002537 -0.142572 5.200000
6.206258 1.099818 -0.375005 0.004902 -0.180206 5.200000
6.164992 1.099543 -0.450000 0.008445 -0.217796 5.200000
6.116260 1.099012 -0.524998 0.013394 -0.255311 5.200000
6.060016 1.098082 -0.599999 0.020003 -0.292687 5.200000
5.996277 1.096540 -0.675001 0.028531 -0.329809 5.200000
5.925076 1.094136 -0.749999 0.039233 -0.366539 5.200000
5.846397 1.090528 -0.825003 0.052403 -0.402540 5.200000
5.760310 1.085353 -0.899999 0.068159 -0.427922 5.200000
5.666846 1.078118 -0.975004 0.086426 -0.452632 5.200000
5.566062 1.068330 -1.049998 0.107412 -0.477358 5.200000
5.458099 1.055408 -1.125005 0.131318 -0.502075 5.200000
5.343056 1.038639 -1.199999 0.158389 -0.526793 5.200000
5.221172 1.017278 -1.275000 0.188715 -0.543972 5.200000
5.092672 0.990582 -1.349999 0.221009 -0.537844 5.200000
4.957827 0.957912 -1.425002 0.254144 -0.520283 5.200000
4.816921 0.918774 -1.499998 0.287407 -0.496998 5.200000
4.670236 0.872740 -1.575004 0.320377 -0.470826 5.200000
4.518042 0.819455 -1.649998 0.352756 -0.443487 5.200000
4.360647 0.758644 -1.725004 0.384361 -0.415916 5.200000
4.198309 0.690019 -1.799998 0.415060 -0.388651 5.200000
4.031297 0.613405 -1.875004 0.444741 -0.362056 5.200000
3.859863 0.528633 -1.951057 0.473369 -0.336464 5.200000
3.684617 0.435767 -1.992962 0.500696 -0.307754 5.200000
3.510422 0.337576 -2.000000 0.525311 -0.271036 5.200000
3.338456 0.235469 -2.000000 0.545295 -0.202055 5.200000
3.168178 0.130560 -2.000000 0.557668 -0.103719 5.200000
2.998993 0.024402 -1.989504 0.561638 -0.003655 5.200000
2.834090 -0.079161 -1.908824 0.558297 0.096350 5.200000
2.674893 -0.177527 -1.833817 0.547393 0.196348 5.200000
2.520737 -0.269731 -1.758821 0.529483 0.296348 5.200000
2.371175 -0.354941 -1.683817 0.504822 0.396353 5.200000
2.225909 -0.432387 -1.608819 0.473566 0.496345 5.200000
2.084781 -0.501491 -1.534133 0.435669 0.593400 5.200000
1.947081 -0.562241 -1.467591 0.395345 0.593400 5.200000
1.814081 -0.614783 -1.392573 0.357071 0.593400 5.200000
1.686286 -0.659839 -1.317577 0.320799 0.593400 5.200000
1.564139 -0.698109 -1.242576 0.286539 0.593400 5.200000
1.448020 -0.730299 -1.167578 0.254285 0.593400 5.200000
1.338232 -0.757070 -1.092576 0.224041 0.593400 5.200000
1.235045 -0.779056 -1.017580 0.195800 0.593400 5.200000
1.138675 -0.796858 -0.942574 0.169567 0.593400 5.200000
1.049287 -0.811044 -0.867575 0.145340 0.593400 5.200000
0.967026 -0.822154 -0.792579 0.123126 0.593400 5.200000
0.892002 -0.830672 -0.717581 0.102913 0.593400 5.200000
0.824291 -0.837048 -0.642574 0.084713 0.593400 5.200000
0.763958 -0.841676 -0.567578 0.068512 0.593400 5.200000
0.711055 -0.844932 -0.492577 0.054328 0.593400 5.200000
0.665602 -0.847120 -0.417574 0.042146 0.593400 5.200000
0.627623 -0.848528 -0.342578 0.031977 0.593400 5.200000
0.597128 -0.849384 -0.267581 0.023813 0.593400 5.200000
0.574131 -0.849861 -0.192575 0.017648 0.592928 5.200000
0.558629 -0.850095 -0.117577 0.013672 0.524596 5.200000
0.550585 -0.850199 -0.042580 0.012003 0.424603 5.200000
0.550163 -0.850212 0.032428 0.011902 0.324600 5.200000
0.557104 -0.850120 0.107424 0.012649 0.224597 5.200000
0.571711 -0.849928 0.188261 0.013640 0.116814 5.200000
0.589024 -0.849687 0.140716 0.014537 0.174390 5.200000
0.599324 -0.849534 0.065425 0.015453 0.275140 5.200000
0.602038 -0.849491 -0.009571 0.015781 0.375144 5.200000
0.597428 -0.849564 -0.084576 0.014927 0.475147 5.200000
0.585201 -0.849722 -0.159984 0.012074 0.571338 5.200000
0.565970 -0.849911 -0.197867 0.006955 0.593400 5.200000
0.549973 -0.849988 -0.122371 0.002673 0.593400 5.200000
