# Supplementary material for: Automatic Parking Controller with a Twin Artificial Neural Network Architecture
Source: Hindawi journal article supplement (doi:10.1155/2019/4801985), 2019-01-01
Supplement: f1 [file 4801985.f1.zip › data/data_179.txt]

6.400000 1.100000 0.000000 0.000000 0.000000 5.200000
6.396265 1.100000 -0.075004 0.000043 -0.026271 5.200000
6.385027 1.099999 -0.149996 0.000312 -0.061432 5.200000
6.366239 1.099982 -0.225000 0.001016 -0.096360 5.200000
6.340005 1.099944 -0.300004 0.002365 -0.131217 5.200000
6.306253 1.099829 -0.374997 0.004576 -0.165961 5.200000
6.264996 1.099571 -0.450000 0.007857 -0.200510 5.200000
6.216261 1.099086 -0.525002 0.012431 -0.234791 5.200000
6.160008 1.098210 -0.599997 0.018532 -0.268673 5.200000
6.096278 1.096793 -0.675001 0.026360 -0.302007 5.200000
6.025058 1.094567 -0.750004 0.036141 -0.334505 5.200000
5.946378 1.091266 -0.824997 0.048038 -0.359624 5.200000
5.860268 1.086531 -0.900001 0.062037 -0.384327 5.200000
5.766736 1.079963 -0.975005 0.078347 -0.409046 5.200000
5.665883 1.071104 -1.049997 0.097156 -0.433764 5.200000
5.557770 1.059408 -1.125001 0.118679 -0.458484 5.200000
5.442505 1.044248 -1.200005 0.143096 -0.481680 5.200000
5.320283 1.024963 -1.274997 0.170057 -0.491779 5.200000
5.191251 1.000881 -1.350001 0.199010 -0.493443 5.200000
5.055686 0.971381 -1.425005 0.229435 -0.488393 5.200000
4.913820 0.935881 -1.499998 0.260843 -0.477383 5.200000
4.765927 0.893842 -1.575001 0.292816 -0.462403 5.200000
4.612330 0.844809 -1.650003 0.325008 -0.445066 5.200000
4.453308 0.788332 -1.724998 0.357200 -0.426604 5.200000
4.289210 0.724055 -1.800002 0.389243 -0.408033 5.200000
4.120350 0.651611 -1.875005 0.421046 -0.390079 5.200000
3.947069 0.570673 -1.951131 0.452617 -0.373674 5.200000
3.770163 0.481190 -2.000000 0.483734 -0.354300 5.200000
3.594463 0.385552 -2.000000 0.512624 -0.319737 5.200000
3.421405 0.285303 -2.000000 0.536361 -0.245179 5.200000
3.250404 0.181586 -2.000000 0.552666 -0.152034 5.200000
3.080609 0.075735 -1.998451 0.560999 -0.052031 5.200000
2.913083 -0.029650 -1.945690 0.561175 0.047974 5.200000
2.751255 -0.130655 -1.870107 0.553551 0.147967 5.200000
2.594725 -0.225950 -1.795104 0.539000 0.247972 5.200000
2.442980 -0.314633 -1.720101 0.517586 0.347965 5.200000
2.295667 -0.395928 -1.645105 0.489511 0.447969 5.200000
2.152568 -0.469116 -1.569782 0.454794 0.551340 5.200000
2.013140 -0.533922 -1.504016 0.414585 0.593400 5.200000
1.877801 -0.590350 -1.428862 0.375337 0.593400 5.200000
1.747428 -0.638928 -1.353864 0.338101 0.593400 5.200000
1.622502 -0.680394 -1.278857 0.302866 0.593400 5.200000
1.503428 -0.715444 -1.203861 0.269635 0.593400 5.200000
1.390534 -0.744756 -1.128865 0.238424 0.593400 5.200000
1.284131 -0.768976 -1.053861 0.209214 0.593400 5.200000
1.184435 -0.788729 -0.978860 0.182003 0.593400 5.200000
1.091652 -0.804596 -0.903864 0.156814 0.593400 5.200000
1.005922 -0.817135 -0.828857 0.133618 0.593400 5.200000
0.927389 -0.826853 -0.753860 0.112441 0.593400 5.200000
0.856126 -0.834204 -0.678863 0.093267 0.593400 5.200000
0.792224 -0.839627 -0.603865 0.076095 0.593400 5.200000
0.735723 -0.843508 -0.528859 0.060942 0.593400 5.200000
0.686655 -0.846177 -0.453863 0.047785 0.593400 5.200000
0.645064 -0.847928 -0.378860 0.036648 0.593400 5.200000
0.610947 -0.849027 -0.303862 0.027511 0.593400 5.200000
0.584320 -0.849664 -0.228862 0.020384 0.593400 5.200000
0.565189 -0.850007 -0.153866 0.015277 0.576400 5.200000
0.553558 -0.850162 -0.078858 0.012568 0.472985 5.200000
0.549407 -0.850220 -0.003861 0.011801 0.372982 5.200000
0.552793 -0.850179 0.071137 0.012219 0.272979 5.200000
0.563645 -0.850038 0.146135 0.013174 0.172975 5.200000
0.581260 -0.849798 0.178360 0.014086 0.126801 5.200000
0.595278 -0.849595 0.101714 0.015043 0.226765 5.200000
0.601638 -0.849499 0.026711 0.015731 0.326763 5.200000
0.600674 -0.849510 -0.048290 0.015551 0.426765 5.200000
0.592053 -0.849636 -0.123286 0.013755 0.527761 5.200000
0.575970 -0.849830 -0.195068 0.009620 0.584066 5.200000
0.556783 -0.849960 -0.158663 0.004489 0.593400 5.200000
0.544648 -0.850000 -0.083652 0.001245 0.593400 5.200000
