# Supplementary material for: Automatic Parking Controller with a Twin Artificial Neural Network Architecture
Source: Hindawi journal article supplement (doi:10.1155/2019/4801985), 2019-01-01
Supplement: f1 [file 4801985.f1.zip › data/data_180.txt]

6.500000 1.100000 0.000000 0.000000 0.000000 5.200000
6.496271 1.100000 -0.074999 0.000041 -0.022935 5.200000
6.485029 1.100000 -0.149997 0.000290 -0.055521 5.200000
6.466242 1.099983 -0.224998 0.000947 -0.087768 5.200000
6.440009 1.099948 -0.300002 0.002195 -0.119884 5.200000
6.406245 1.099839 -0.375004 0.004243 -0.151798 5.200000
6.365001 1.099609 -0.449997 0.007275 -0.183412 5.200000
6.316260 1.099154 -0.525000 0.011484 -0.214626 5.200000
6.260000 1.098348 -0.600000 0.017086 -0.245395 5.200000
6.196278 1.097039 -0.674998 0.024239 -0.274027 5.200000
6.125044 1.094997 -0.749998 0.033082 -0.298582 5.200000
6.046363 1.091986 -0.825002 0.043707 -0.323301 5.200000
5.960216 1.087682 -0.899994 0.056286 -0.348019 5.200000
5.866655 1.081731 -0.974997 0.071024 -0.372736 5.200000
5.765733 1.073701 -1.050001 0.088095 -0.397489 5.200000
5.657497 1.063081 -1.125001 0.107674 -0.420701 5.200000
5.542076 1.049334 -1.199999 0.129637 -0.436115 5.200000
5.419561 1.031861 -1.274999 0.153784 -0.446848 5.200000
5.290139 1.010073 -1.349996 0.179898 -0.452834 5.200000
5.153993 0.983357 -1.424995 0.207732 -0.454115 5.200000
5.011343 0.951104 -1.499997 0.236973 -0.451221 5.200000
4.862468 0.912740 -1.575001 0.267340 -0.445057 5.200000
4.707633 0.867707 -1.650002 0.298588 -0.436639 5.200000
4.547176 0.815500 -1.724996 0.330542 -0.427097 5.200000
4.381432 0.755578 -1.799999 0.363087 -0.417425 5.200000
4.210776 0.687479 -1.874998 0.396200 -0.408609 5.200000
4.035623 0.610702 -1.950407 0.429957 -0.401645 5.200000
3.856855 0.524965 -1.999110 0.464236 -0.391242 5.200000
3.679506 0.432449 -2.000000 0.497062 -0.367527 5.200000
3.505140 0.334480 -2.000000 0.525490 -0.299412 5.200000
3.333227 0.232298 -2.000000 0.545818 -0.200556 5.200000
3.162985 0.127328 -2.000000 0.557848 -0.100561 5.200000
2.993817 0.021135 -1.981499 0.561586 -0.000559 5.200000
2.829082 -0.082276 -1.906503 0.558143 0.099441 5.200000
2.670061 -0.180480 -1.831502 0.546919 0.199436 5.200000
2.516053 -0.272476 -1.756499 0.528822 0.299443 5.200000
2.366622 -0.357451 -1.681497 0.503951 0.399438 5.200000
2.221491 -0.434656 -1.606498 0.472490 0.499439 5.200000
2.080468 -0.503496 -1.532214 0.434425 0.593400 5.200000
1.942900 -0.563983 -1.465263 0.394133 0.593400 5.200000
1.810052 -0.616283 -1.390255 0.355920 0.593400 5.200000
1.682425 -0.661120 -1.315259 0.319710 0.593400 5.200000
1.560458 -0.699192 -1.240259 0.285512 0.593400 5.200000
1.444530 -0.731205 -1.165261 0.253320 0.593400 5.200000
1.334943 -0.757818 -1.090258 0.223138 0.593400 5.200000
1.231964 -0.779666 -1.015262 0.194959 0.593400 5.200000
1.135807 -0.797348 -0.940257 0.168788 0.593400 5.200000
1.046638 -0.811431 -0.865258 0.144623 0.593400 5.200000
0.964600 -0.822453 -0.790261 0.122472 0.593400 5.200000
0.889801 -0.830898 -0.715264 0.102321 0.593400 5.200000
0.822316 -0.837215 -0.640257 0.084182 0.593400 5.200000
0.762211 -0.841796 -0.565261 0.068043 0.593400 5.200000
0.709538 -0.845014 -0.490260 0.053921 0.593400 5.200000
0.664315 -0.847174 -0.415256 0.041802 0.593400 5.200000
0.626567 -0.848562 -0.340260 0.031694 0.593400 5.200000
0.596303 -0.849403 -0.265264 0.023593 0.593400 5.200000
0.573539 -0.849871 -0.190258 0.017488 0.592555 5.200000
0.558273 -0.850100 -0.115259 0.013591 0.521507 5.200000
0.550484 -0.850200 -0.040262 0.011985 0.421513 5.200000
0.550248 -0.850211 0.034745 0.011913 0.321510 5.200000
0.557442 -0.850115 0.109742 0.012680 0.221507 5.200000
0.572280 -0.849920 0.190553 0.013668 0.113759 5.200000
0.589458 -0.849681 0.138354 0.014569 0.177598 5.200000
0.599533 -0.849531 0.063107 0.015476 0.278231 5.200000
0.601994 -0.849492 -0.011888 0.015774 0.378234 5.200000
0.597163 -0.849568 -0.086894 0.014873 0.478237 5.200000
0.584704 -0.849728 -0.162747 0.011945 0.572405 5.200000
0.565381 -0.849915 -0.197490 0.006798 0.593400 5.200000
0.549605 -0.849989 -0.120054 0.002575 0.593400 5.200000
