# Supplementary material for: Automatic Parking Controller with a Twin Artificial Neural Network Architecture
Source: Hindawi journal article supplement (doi:10.1155/2019/4801985), 2019-01-01
Supplement: f1 [file 4801985.f1.zip › data/data_181.txt]

6.600000 1.100000 0.000000 0.000000 0.000000 5.200000
6.596280 1.100000 -0.074998 0.000040 -0.019490 5.200000
6.585026 1.100000 -0.149996 0.000268 -0.049428 5.200000
6.566238 1.099984 -0.224997 0.000877 -0.078937 5.200000
6.540010 1.099951 -0.300001 0.002023 -0.108278 5.200000
6.506239 1.099848 -0.375001 0.003901 -0.137357 5.200000
6.465004 1.099636 -0.449999 0.006676 -0.166134 5.200000
6.416251 1.099215 -0.524998 0.010530 -0.193694 5.200000
6.360007 1.098489 -0.600001 0.015599 -0.218467 5.200000
6.296275 1.097291 -0.675003 0.021997 -0.243188 5.200000
6.225042 1.095452 -0.750002 0.029895 -0.267905 5.200000
6.146348 1.092733 -0.825000 0.039460 -0.292623 5.200000
6.060176 1.088842 -0.900001 0.050879 -0.317348 5.200000
5.966590 1.083460 -0.975004 0.064312 -0.341874 5.200000
5.865597 1.076173 -1.049996 0.079857 -0.362594 5.200000
5.757276 1.066552 -1.124999 0.097466 -0.379973 5.200000
5.641690 1.054112 -1.200001 0.117150 -0.394619 5.200000
5.518957 1.038326 -1.274999 0.138850 -0.406249 5.200000
5.389198 1.018639 -1.349997 0.162470 -0.414747 5.200000
5.252574 0.994457 -1.424999 0.187895 -0.420228 5.200000
5.109287 0.965214 -1.500002 0.214957 -0.422952 5.200000
4.959553 0.930271 -1.575003 0.243511 -0.423480 5.200000
4.803673 0.889062 -1.650000 0.273433 -0.422675 5.200000
4.641924 0.840961 -1.724999 0.304652 -0.421271 5.200000
4.474684 0.785378 -1.800002 0.337152 -0.420396 5.200000
4.302340 0.721673 -1.875005 0.371039 -0.421035 5.200000
4.125350 0.649182 -1.951921 0.406552 -0.425482 5.200000
3.944738 0.567423 -1.997408 0.443667 -0.426638 5.200000
3.765707 0.478250 -2.000000 0.480242 -0.408878 5.200000
3.589897 0.382931 -2.000000 0.512363 -0.339478 5.200000
3.416884 0.282604 -2.000000 0.536968 -0.249548 5.200000
3.245927 0.178819 -2.000000 0.552998 -0.149383 5.200000
3.076216 0.072977 -2.000000 0.560948 -0.049377 5.200000
2.908729 -0.032392 -1.944284 0.560908 0.050618 5.200000
2.747039 -0.133247 -1.868112 0.553299 0.150624 5.200000
2.590641 -0.228400 -1.793113 0.538503 0.250621 5.200000
2.439026 -0.316882 -1.718115 0.516941 0.350615 5.200000
2.291822 -0.397976 -1.643115 0.488668 0.450623 5.200000
2.148838 -0.470938 -1.567659 0.453770 0.555334 5.200000
2.009495 -0.535523 -1.502220 0.413519 0.593400 5.200000
1.874281 -0.591735 -1.426874 0.374324 0.593400 5.200000
1.744046 -0.640116 -1.351876 0.337142 0.593400 5.200000
1.619269 -0.681403 -1.276870 0.301960 0.593400 5.200000
1.500355 -0.716292 -1.201873 0.268781 0.593400 5.200000
1.387629 -0.745462 -1.126877 0.237624 0.593400 5.200000
1.281400 -0.769555 -1.051874 0.208467 0.593400 5.200000
1.181886 -0.789198 -0.976873 0.181310 0.593400 5.200000
1.089289 -0.804968 -0.901877 0.156173 0.593400 5.200000
1.003749 -0.817426 -0.826870 0.133031 0.593400 5.200000
0.925407 -0.827075 -0.751873 0.111908 0.593400 5.200000
0.854338 -0.834370 -0.676876 0.092786 0.593400 5.200000
0.790631 -0.839748 -0.601877 0.075667 0.593400 5.200000
0.734327 -0.843593 -0.526871 0.060568 0.593400 5.200000
0.685455 -0.846235 -0.451875 0.047463 0.593400 5.200000
0.644062 -0.847965 -0.376873 0.036380 0.593400 5.200000
0.610143 -0.849049 -0.301875 0.027296 0.593400 5.200000
0.583716 -0.849677 -0.226874 0.020221 0.593400 5.200000
0.564785 -0.850013 -0.151878 0.015174 0.574407 5.200000
0.553358 -0.850165 -0.076871 0.012528 0.470335 5.200000
0.549400 -0.850220 -0.001874 0.011800 0.370332 5.200000
0.552984 -0.850176 0.073124 0.012240 0.270329 5.200000
0.564037 -0.850033 0.148122 0.013202 0.170325 5.200000
0.581745 -0.849791 0.176032 0.014109 0.129535 5.200000
0.595550 -0.849591 0.099727 0.015068 0.229414 5.200000
0.601714 -0.849497 0.024724 0.015741 0.329413 5.200000
0.600539 -0.849512 -0.050278 0.015527 0.429416 5.200000
0.591724 -0.849641 -0.125274 0.013678 0.530871 5.200000
0.575442 -0.849835 -0.195352 0.009480 0.584741 5.200000
0.556371 -0.849962 -0.156672 0.004379 0.593400 5.200000
0.544436 -0.850000 -0.081665 0.001189 0.593400 5.200000
