# Supplementary material for: Automatic Parking Controller with a Twin Artificial Neural Network Architecture
Source: Hindawi journal article supplement (doi:10.1155/2019/4801985), 2019-01-01
Supplement: f1 [file 4801985.f1.zip › data/data_182.txt]

6.700000 1.100000 0.000000 0.000000 0.000000 5.200000
6.696286 1.100000 -0.074999 0.000034 -0.016454 5.200000
6.685017 1.100000 -0.149999 0.000248 -0.043383 5.200000
6.666247 1.099984 -0.225004 0.000807 -0.070281 5.200000
6.640009 1.099955 -0.299997 0.001852 -0.096338 5.200000
6.606243 1.099868 -0.375003 0.003558 -0.121147 5.200000
6.565011 1.099668 -0.449996 0.006042 -0.145873 5.200000
6.516244 1.099289 -0.525001 0.009477 -0.170585 5.200000
6.460014 1.098638 -0.600002 0.014000 -0.195311 5.200000
6.396262 1.097559 -0.675000 0.019794 -0.220016 5.200000
6.325041 1.095903 -0.750000 0.026990 -0.244653 5.200000
6.246321 1.093439 -0.824999 0.035755 -0.267755 5.200000
6.160143 1.089915 -0.900004 0.046158 -0.288929 5.200000
6.066524 1.085025 -0.974997 0.058296 -0.308660 5.200000
5.965485 1.078434 -1.050003 0.072250 -0.326747 5.200000
5.857089 1.069733 -1.124996 0.088058 -0.343000 5.200000
5.741386 1.058498 -1.200001 0.105749 -0.357248 5.200000
5.618467 1.044243 -1.275004 0.125314 -0.369426 5.200000
5.488420 1.026450 -1.350000 0.146740 -0.379526 5.200000
5.351412 1.004584 -1.425002 0.169950 -0.387691 5.200000
5.207582 0.978059 -1.499999 0.194916 -0.394235 5.200000
5.057168 0.946282 -1.575004 0.221578 -0.399602 5.200000
4.900378 0.908624 -1.649998 0.249929 -0.404439 5.200000
4.737520 0.864441 -1.725003 0.280005 -0.409578 5.200000
4.568931 0.813059 -1.799996 0.311895 -0.416066 5.200000
4.395035 0.753723 -1.875001 0.345866 -0.425273 5.200000
4.216318 0.685654 -1.950259 0.382328 -0.439185 5.200000
4.033882 0.608122 -1.999139 0.421558 -0.451274 5.200000
3.853003 0.522645 -2.000000 0.461334 -0.448922 5.200000
3.675611 0.430300 -2.000000 0.497308 -0.381953 5.200000
3.501294 0.332267 -2.000000 0.526004 -0.299384 5.200000
3.329437 0.229974 -2.000000 0.546195 -0.198367 5.200000
3.159200 0.124967 -2.000000 0.558044 -0.098370 5.200000
2.990057 0.018761 -1.978172 0.561826 0.001625 5.200000
2.825546 -0.084488 -1.904860 0.557980 0.101632 5.200000
2.666632 -0.182558 -1.829855 0.546609 0.201627 5.200000
2.512734 -0.274416 -1.754861 0.528343 0.301633 5.200000
2.363401 -0.359224 -1.679856 0.503349 0.401628 5.200000
2.218358 -0.436256 -1.604858 0.471724 0.501630 5.200000
2.077412 -0.504914 -1.530892 0.433540 0.593400 5.200000
1.939938 -0.565213 -1.463620 0.393274 0.593400 5.200000
1.807200 -0.617341 -1.388613 0.355106 0.593400 5.200000
1.679692 -0.662023 -1.313616 0.318940 0.593400 5.200000
1.557853 -0.699956 -1.238617 0.284785 0.593400 5.200000
1.442060 -0.731843 -1.163619 0.252638 0.593400 5.200000
1.332616 -0.758345 -1.088615 0.222499 0.593400 5.200000
1.229784 -0.780095 -1.013620 0.194364 0.593400 5.200000
1.133779 -0.797693 -0.938615 0.168238 0.593400 5.200000
1.044764 -0.811703 -0.863615 0.144116 0.593400 5.200000
0.962885 -0.822664 -0.788619 0.122009 0.593400 5.200000
0.888245 -0.831057 -0.713621 0.101903 0.593400 5.200000
0.820922 -0.837332 -0.638614 0.083807 0.593400 5.200000
0.760977 -0.841880 -0.563618 0.067713 0.593400 5.200000
0.708467 -0.845072 -0.488618 0.053634 0.593400 5.200000
0.663408 -0.847211 -0.413613 0.041559 0.593400 5.200000
0.625823 -0.848586 -0.338617 0.031494 0.593400 5.200000
0.595723 -0.849417 -0.263621 0.023438 0.593400 5.200000
0.573123 -0.849879 -0.188615 0.017376 0.592230 5.200000
0.558024 -0.850103 -0.113616 0.013535 0.519317 5.200000
0.550415 -0.850202 -0.038620 0.011973 0.419323 5.200000
0.550310 -0.850211 0.036388 0.011921 0.319320 5.200000
0.557684 -0.850112 0.111385 0.012701 0.219317 5.200000
0.572683 -0.849915 0.191999 0.013688 0.111832 5.200000
0.589761 -0.849677 0.136678 0.014591 0.179877 5.200000
0.599677 -0.849529 0.061465 0.015493 0.280421 5.200000
0.601959 -0.849492 -0.013531 0.015768 0.380424 5.200000
0.596969 -0.849570 -0.088536 0.014833 0.480427 5.200000
0.584346 -0.849733 -0.164774 0.011852 0.573116 5.200000
0.564966 -0.849917 -0.196927 0.006686 0.593400 5.200000
0.549351 -0.849990 -0.118411 0.002507 0.593400 5.200000
