# Supplementary material for: Automatic Parking Controller with a Twin Artificial Neural Network Architecture
Source: Hindawi journal article supplement (doi:10.1155/2019/4801985), 2019-01-01
Supplement: f1 [file 4801985.f1.zip › data/data_183.txt]

6.800000 1.100000 0.000000 0.000000 -0.000000 5.200000
6.796292 1.100000 -0.075000 0.000033 -0.012771 5.200000
6.785010 1.100000 -0.150000 0.000219 -0.035994 5.200000
6.766252 1.099985 -0.224999 0.000717 -0.060431 5.200000
6.740006 1.099957 -0.299999 0.001660 -0.084709 5.200000
6.706247 1.099882 -0.374999 0.003199 -0.108693 5.200000
6.665012 1.099698 -0.449999 0.005464 -0.132310 5.200000
6.616247 1.099357 -0.524999 0.008619 -0.155492 5.200000
6.560008 1.098763 -0.599998 0.012767 -0.178115 5.200000
6.496256 1.097786 -0.674998 0.018064 -0.200073 5.200000
6.425033 1.096265 -0.749998 0.024612 -0.221238 5.200000
6.346306 1.094026 -0.824998 0.032540 -0.241488 5.200000
6.260124 1.090821 -0.899998 0.041928 -0.260662 5.200000
6.166469 1.086384 -0.974998 0.052887 -0.278645 5.200000
6.065408 1.080408 -1.049997 0.065463 -0.295309 5.200000
5.956935 1.072524 -1.124997 0.079732 -0.310564 5.200000
5.841135 1.062353 -1.199997 0.095723 -0.324335 5.200000
5.718063 1.049437 -1.274997 0.113456 -0.336644 5.200000
5.587813 1.033326 -1.349997 0.132938 -0.347548 5.200000
5.450489 1.013477 -1.424996 0.154183 -0.357265 5.200000
5.306239 0.989375 -1.499996 0.177177 -0.366078 5.200000
5.155244 0.960408 -1.575006 0.201966 -0.374432 5.200000
4.997717 0.925983 -1.650006 0.228581 -0.382958 5.200000
4.833929 0.885417 -1.725006 0.257153 -0.392464 5.200000
4.664176 0.837996 -1.800005 0.287888 -0.404054 5.200000
4.488886 0.782932 -1.875005 0.321128 -0.419306 5.200000
4.308513 0.719313 -1.952413 0.357501 -0.441328 5.200000
4.124182 0.646278 -1.995416 0.397431 -0.463235 5.200000
3.941442 0.565073 -2.000000 0.439197 -0.473721 5.200000
3.762220 0.476346 -2.000000 0.479568 -0.436399 5.200000
3.586436 0.380960 -2.000000 0.513010 -0.347991 5.200000
3.413458 0.280578 -2.000000 0.537326 -0.247408 5.200000
3.242542 0.176719 -2.000000 0.553274 -0.147408 5.200000
3.072838 0.070863 -1.998231 0.560864 -0.047408 5.200000
2.905491 -0.034435 -1.942483 0.560708 0.052591 5.200000
2.743903 -0.135178 -1.866637 0.553090 0.152591 5.200000
2.587614 -0.230204 -1.791637 0.538134 0.252591 5.200000
2.436084 -0.318555 -1.716637 0.516440 0.352591 5.200000
2.288963 -0.399500 -1.641637 0.488045 0.452590 5.200000
2.146071 -0.472281 -1.566074 0.453001 0.558441 5.200000
2.006787 -0.536710 -1.500856 0.412727 0.593400 5.200000
1.871666 -0.592760 -1.425397 0.373573 0.593400 5.200000
1.741534 -0.640995 -1.350399 0.336429 0.593400 5.200000
1.616868 -0.682149 -1.275392 0.301287 0.593400 5.200000
1.498074 -0.716920 -1.200396 0.268148 0.593400 5.200000
1.385472 -0.745984 -1.125400 0.237030 0.593400 5.200000
1.279374 -0.769984 -1.050397 0.207913 0.593400 5.200000
1.179994 -0.789544 -0.975395 0.180795 0.593400 5.200000
1.087535 -0.805244 -0.900399 0.155698 0.593400 5.200000
1.002136 -0.817642 -0.825393 0.132595 0.593400 5.200000
0.923938 -0.827240 -0.750395 0.111512 0.593400 5.200000
0.853013 -0.834493 -0.675398 0.092430 0.593400 5.200000
0.789451 -0.839837 -0.600400 0.075350 0.593400 5.200000
0.733292 -0.843655 -0.525393 0.060291 0.593400 5.200000
0.684567 -0.846277 -0.450398 0.047225 0.593400 5.200000
0.643320 -0.847992 -0.375396 0.036181 0.593400 5.200000
0.609548 -0.849066 -0.300398 0.027137 0.593400 5.200000
0.583269 -0.849686 -0.225396 0.020101 0.593400 5.200000
0.564487 -0.850017 -0.150400 0.015099 0.572775 5.200000
0.553210 -0.850166 -0.075394 0.012499 0.468365 5.200000
0.549401 -0.850220 -0.000396 0.011800 0.368361 5.200000
0.553126 -0.850174 0.074601 0.012256 0.268359 5.200000
0.564330 -0.850029 0.149599 0.013222 0.168355 5.200000
0.582102 -0.849786 0.174295 0.014125 0.131584 5.200000
0.595748 -0.849588 0.098249 0.015087 0.231384 5.200000
0.601767 -0.849496 0.023247 0.015748 0.331383 5.200000
0.600434 -0.849514 -0.051756 0.015507 0.431386 5.200000
0.591475 -0.849644 -0.126751 0.013620 0.533210 5.200000
0.575044 -0.849838 -0.195555 0.009374 0.585256 5.200000
0.556067 -0.849963 -0.155195 0.004298 0.593400 5.200000
0.544284 -0.850000 -0.080187 0.001148 0.593400 5.200000
