# Supplementary material for: Automatic Parking Controller with a Twin Artificial Neural Network Architecture
Source: Hindawi journal article supplement (doi:10.1155/2019/4801985), 2019-01-01
Supplement: f1 [file 4801985.f1.zip › data/data_184.txt]

6.900000 1.100000 0.000000 0.000000 -0.000000 5.200000
6.896301 1.100000 -0.075002 0.000028 -0.010557 5.200000
6.884997 1.100000 -0.150005 0.000201 -0.031341 5.200000
6.866256 1.099997 -0.225002 0.000652 -0.053384 5.200000
6.840003 1.099959 -0.299999 0.001511 -0.075257 5.200000
6.806253 1.099888 -0.375001 0.002899 -0.096876 5.200000
6.764998 1.099727 -0.450004 0.004956 -0.118166 5.200000
6.716253 1.099421 -0.525001 0.007803 -0.139043 5.200000
6.660005 1.098876 -0.599999 0.011544 -0.159422 5.200000
6.596264 1.097997 -0.675001 0.016317 -0.179210 5.200000
6.525021 1.096629 -0.750003 0.022222 -0.198318 5.200000
6.446301 1.094601 -0.825001 0.029356 -0.216630 5.200000
6.360100 1.091709 -0.899998 0.037803 -0.234079 5.200000
6.266433 1.087716 -0.975000 0.047668 -0.250566 5.200000
6.165331 1.082325 -1.050002 0.058991 -0.266043 5.200000
6.056807 1.075222 -1.125000 0.071857 -0.280459 5.200000
5.940930 1.066050 -1.199997 0.086308 -0.293824 5.200000
5.817721 1.054399 -1.274999 0.102374 -0.306200 5.200000
5.687284 1.039838 -1.350002 0.120103 -0.317702 5.200000
5.549699 1.021888 -1.424999 0.139524 -0.328564 5.200000
5.405105 1.000029 -1.499996 0.160700 -0.339085 5.200000
5.253627 0.973695 -1.574998 0.183692 -0.349721 5.200000
5.095472 0.942294 -1.650001 0.208612 -0.361088 5.200000
4.930866 0.905131 -1.724998 0.235643 -0.373995 5.200000
4.760110 0.861499 -1.800005 0.265063 -0.389700 5.200000
4.583574 0.810525 -1.875003 0.297539 -0.413624 5.200000
4.401763 0.751225 -1.950351 0.333584 -0.438395 5.200000
4.215782 0.682651 -1.999120 0.373361 -0.463117 5.200000
4.031081 0.605781 -2.000000 0.416006 -0.488001 5.200000
3.849987 0.520919 -2.000000 0.459936 -0.478793 5.200000
3.672562 0.428651 -2.000000 0.497745 -0.397344 5.200000
3.498300 0.330512 -2.000000 0.526461 -0.296608 5.200000
3.326465 0.228189 -2.000000 0.546419 -0.196608 5.200000
3.156268 0.123131 -2.000000 0.558259 -0.096608 5.200000
2.987138 0.016940 -1.981136 0.561837 0.003391 5.200000
2.822706 -0.086271 -1.903540 0.557797 0.103391 5.200000
2.663881 -0.184221 -1.828537 0.546376 0.203391 5.200000
2.510066 -0.275981 -1.753538 0.527946 0.303391 5.200000
2.360812 -0.360645 -1.678542 0.502852 0.403390 5.200000
2.215837 -0.437542 -1.603541 0.471107 0.503390 5.200000
2.074956 -0.506051 -1.529850 0.432827 0.593400 5.200000
1.937560 -0.566198 -1.462300 0.392585 0.593400 5.200000
1.804910 -0.618189 -1.387293 0.354452 0.593400 5.200000
1.677498 -0.662747 -1.312296 0.318321 0.593400 5.200000
1.555762 -0.700568 -1.237298 0.284202 0.593400 5.200000
1.440078 -0.732355 -1.162299 0.252091 0.593400 5.200000
1.330748 -0.758767 -1.087295 0.221986 0.593400 5.200000
1.228034 -0.780439 -1.012299 0.193886 0.593400 5.200000
1.132151 -0.797969 -0.937295 0.167796 0.593400 5.200000
1.043261 -0.811921 -0.862295 0.143709 0.593400 5.200000
0.961509 -0.822832 -0.787299 0.121638 0.593400 5.200000
0.886998 -0.831184 -0.712301 0.101567 0.593400 5.200000
0.819804 -0.837426 -0.637294 0.083507 0.593400 5.200000
0.759989 -0.841947 -0.562298 0.067448 0.593400 5.200000
0.707608 -0.845118 -0.487298 0.053403 0.593400 5.200000
0.662681 -0.847241 -0.412293 0.041365 0.593400 5.200000
0.625227 -0.848604 -0.337297 0.031335 0.593400 5.200000
0.595259 -0.849427 -0.262301 0.023314 0.593400 5.200000
0.572791 -0.849885 -0.187296 0.017286 0.591935 5.200000
0.557825 -0.850106 -0.112296 0.013489 0.517557 5.200000
0.550361 -0.850202 -0.037300 0.011964 0.417563 5.200000
0.550359 -0.850210 0.037708 0.011927 0.317560 5.200000
0.557880 -0.850109 0.112705 0.012718 0.217557 5.200000
0.573008 -0.849910 0.193041 0.013704 0.110444 5.200000
0.590002 -0.849673 0.135331 0.014608 0.181710 5.200000
0.599789 -0.849527 0.060144 0.015505 0.282181 5.200000
0.601930 -0.849493 -0.014851 0.015764 0.382184 5.200000
0.596810 -0.849572 -0.089855 0.014800 0.482187 5.200000
0.584055 -0.849737 -0.166431 0.011776 0.573661 5.200000
0.564632 -0.849919 -0.196309 0.006597 0.593400 5.200000
0.549149 -0.849991 -0.117091 0.002453 0.593400 5.200000
