# Supplementary material for: Automatic Parking Controller with a Twin Artificial Neural Network Architecture
Source: Hindawi journal article supplement (doi:10.1155/2019/4801985), 2019-01-01
Supplement: f1 [file 4801985.f1.zip › data/data_185.txt]

7.000000 1.100000 0.000000 0.000000 -0.000000 5.200000
6.996307 1.100000 -0.074999 0.000027 -0.008769 5.200000
6.984990 1.100000 -0.149999 0.000185 -0.026555 5.200000
6.966258 1.099997 -0.224998 0.000587 -0.046216 5.200000
6.939994 1.099972 -0.299998 0.001351 -0.065695 5.200000
6.906255 1.099904 -0.375004 0.002601 -0.084958 5.200000
6.864993 1.099762 -0.449997 0.004441 -0.103927 5.200000
6.816257 1.099478 -0.525003 0.006974 -0.122542 5.200000
6.759996 1.098999 -0.599996 0.010319 -0.140743 5.200000
6.696261 1.098210 -0.675002 0.014575 -0.158435 5.200000
6.625014 1.096979 -0.749996 0.019843 -0.175581 5.200000
6.546293 1.095179 -0.825002 0.026198 -0.192088 5.200000
6.460074 1.092596 -0.899995 0.033735 -0.207931 5.200000
6.366398 1.089033 -0.975000 0.042540 -0.223049 5.200000
6.265260 1.084216 -1.050003 0.052664 -0.237431 5.200000
6.156698 1.077876 -1.124999 0.064179 -0.251083 5.200000
6.040736 1.069677 -1.200002 0.077146 -0.264058 5.200000
5.917435 1.059260 -1.274998 0.091622 -0.276457 5.200000
5.786830 1.046204 -1.350001 0.107671 -0.288419 5.200000
5.649030 1.030098 -1.424998 0.125341 -0.300207 5.200000
5.504103 1.010419 -1.500000 0.144740 -0.312121 5.200000
5.352206 0.986649 -1.574997 0.165951 -0.324628 5.200000
5.193491 0.958184 -1.649999 0.189158 -0.338259 5.200000
5.028177 0.924361 -1.724997 0.214873 -0.361132 5.200000
4.856533 0.884331 -1.800001 0.243714 -0.385854 5.200000
4.678952 0.837180 -1.874996 0.275913 -0.410570 5.200000
4.495869 0.781827 -1.952421 0.311703 -0.435292 5.200000
4.308374 0.717362 -1.995653 0.351205 -0.460012 5.200000
4.122082 0.644653 -2.000000 0.393524 -0.484727 5.200000
3.939133 0.563905 -2.000000 0.438303 -0.507815 5.200000
3.759920 0.475145 -2.000000 0.480092 -0.441216 5.200000
3.584170 0.379703 -2.000000 0.513362 -0.346092 5.200000
3.411237 0.279246 -2.000000 0.537615 -0.246090 5.200000
3.240336 0.175363 -2.000000 0.553381 -0.146087 5.200000
3.070535 0.069410 -1.996311 0.561028 -0.046089 5.200000
2.903315 -0.035791 -1.940635 0.560743 0.053909 5.200000
2.741808 -0.136477 -1.865649 0.552927 0.153912 5.200000
2.585585 -0.231417 -1.790649 0.537904 0.253914 5.200000
2.434112 -0.319681 -1.715644 0.516107 0.353911 5.200000
2.287051 -0.400514 -1.640650 0.487630 0.453910 5.200000
2.144214 -0.473183 -1.564993 0.452481 0.560663 5.200000
2.004974 -0.537503 -1.499930 0.412197 0.593400 5.200000
1.869915 -0.593445 -1.424406 0.373069 0.593400 5.200000
1.739852 -0.641583 -1.349409 0.335952 0.593400 5.200000
1.615261 -0.682648 -1.274402 0.300837 0.593400 5.200000
1.496546 -0.717340 -1.199405 0.267724 0.593400 5.200000
1.384029 -0.746333 -1.124409 0.236632 0.593400 5.200000
1.278018 -0.770270 -1.049407 0.207542 0.593400 5.200000
1.178728 -0.789776 -0.974405 0.180450 0.593400 5.200000
1.086361 -0.805428 -0.899409 0.155380 0.593400 5.200000
1.001057 -0.817785 -0.824403 0.132304 0.593400 5.200000
0.922954 -0.827350 -0.749405 0.111247 0.593400 5.200000
0.852126 -0.834575 -0.674408 0.092192 0.593400 5.200000
0.788661 -0.839897 -0.599410 0.075138 0.593400 5.200000
0.732601 -0.843697 -0.524403 0.060105 0.593400 5.200000
0.683973 -0.846305 -0.449408 0.047066 0.593400 5.200000
0.642825 -0.848010 -0.374406 0.036048 0.593400 5.200000
0.609151 -0.849077 -0.299408 0.027031 0.593400 5.200000
0.582971 -0.849692 -0.224406 0.020021 0.593400 5.200000
0.564288 -0.850020 -0.149410 0.015048 0.571615 5.200000
0.553112 -0.850168 -0.074404 0.012479 0.467045 5.200000
0.549403 -0.850220 0.000594 0.011800 0.367041 5.200000
0.553222 -0.850173 0.075591 0.012266 0.267039 5.200000
0.564528 -0.850027 0.150589 0.013235 0.167035 5.200000
0.582339 -0.849783 0.173134 0.014136 0.132959 5.200000
0.595879 -0.849586 0.097259 0.015099 0.232703 5.200000
0.601801 -0.849496 0.022257 0.015752 0.332703 5.200000
0.600361 -0.849515 -0.052746 0.015494 0.432706 5.200000
0.591306 -0.849646 -0.127741 0.013580 0.534784 5.200000
0.574774 -0.849841 -0.195687 0.009302 0.585605 5.200000
0.555864 -0.849964 -0.154205 0.004244 0.593400 5.200000
0.544185 -0.850000 -0.079197 0.001121 0.593400 5.200000
