# Supplementary material for: Automatic Parking Controller with a Twin Artificial Neural Network Architecture
Source: Hindawi journal article supplement (doi:10.1155/2019/4801985), 2019-01-01
Supplement: f1 [file 4801985.f1.zip › data/data_186.txt]

7.100000 1.100000 0.000000 0.000000 0.000000 5.200000
7.096315 1.100000 -0.075001 0.000027 -0.007438 5.200000
7.084990 1.100000 -0.150003 0.000170 -0.022203 5.200000
7.066262 1.099998 -0.224999 0.000525 -0.039661 5.200000
7.039988 1.099973 -0.300004 0.001220 -0.056967 5.200000
7.006260 1.099910 -0.375002 0.002328 -0.074103 5.200000
6.964995 1.099783 -0.449997 0.003968 -0.090987 5.200000
6.916255 1.099533 -0.525005 0.006230 -0.107585 5.200000
6.859992 1.099103 -0.600001 0.009218 -0.123845 5.200000
6.796268 1.098400 -0.674999 0.013004 -0.139703 5.200000
6.725009 1.097306 -0.750004 0.017698 -0.155132 5.200000
6.646282 1.095699 -0.825000 0.023369 -0.170084 5.200000
6.560064 1.093392 -0.900002 0.030105 -0.184531 5.200000
6.466365 1.090212 -0.975002 0.037963 -0.198475 5.200000
6.365213 1.085915 -1.049998 0.047029 -0.211902 5.200000
6.256604 1.080245 -1.125005 0.057367 -0.224879 5.200000
6.140585 1.072919 -1.200001 0.069040 -0.237461 5.200000
6.017188 1.063583 -1.274997 0.082112 -0.249771 5.200000
5.886470 1.051877 -1.350005 0.096661 -0.261974 5.200000
5.748472 1.037383 -1.425000 0.112776 -0.274330 5.200000
5.603309 1.019648 -1.500000 0.130561 -0.287161 5.200000
5.451063 0.998152 -1.575003 0.150140 -0.300722 5.200000
5.291904 0.972339 -1.649999 0.171873 -0.320074 5.200000
5.126001 0.941468 -1.725004 0.196363 -0.345094 5.200000
4.953633 0.904753 -1.800002 0.223914 -0.369817 5.200000
4.775111 0.861230 -1.874998 0.254743 -0.394116 5.200000
4.590878 0.809911 -1.950769 0.289194 -0.427422 5.200000
4.402018 0.749746 -1.998902 0.328213 -0.458873 5.200000
4.214020 0.681332 -2.000000 0.370447 -0.483306 5.200000
4.029245 0.604818 -2.000000 0.415356 -0.510335 5.200000
3.848141 0.520000 -2.000000 0.460126 -0.481006 5.200000
3.670752 0.427665 -2.000000 0.498095 -0.396690 5.200000
3.496514 0.329475 -2.000000 0.526706 -0.295600 5.200000
3.324702 0.227113 -2.000000 0.546606 -0.195600 5.200000
3.154524 0.122034 -2.000000 0.558310 -0.095600 5.200000
2.985507 0.015918 -1.977735 0.561616 0.004400 5.200000
2.821075 -0.087291 -1.902873 0.557679 0.104400 5.200000
2.662308 -0.185181 -1.827783 0.546227 0.204400 5.200000
2.508535 -0.276870 -1.752779 0.527721 0.304400 5.200000
2.359323 -0.361459 -1.677783 0.502570 0.404400 5.200000
2.214402 -0.438276 -1.602779 0.470749 0.504400 5.200000
2.073546 -0.506703 -1.529260 0.432419 0.593400 5.200000
1.936196 -0.566763 -1.461543 0.392190 0.593400 5.200000
1.803596 -0.618674 -1.386535 0.354077 0.593400 5.200000
1.676240 -0.663162 -1.311539 0.317966 0.593400 5.200000
1.554563 -0.700918 -1.236540 0.283868 0.593400 5.200000
1.438941 -0.732647 -1.161542 0.251777 0.593400 5.200000
1.329677 -0.759009 -1.086537 0.221693 0.593400 5.200000
1.227031 -0.780636 -1.011542 0.193612 0.593400 5.200000
1.131218 -0.798127 -0.936538 0.167543 0.593400 5.200000
1.042399 -0.812046 -0.861537 0.143476 0.593400 5.200000
0.960720 -0.822929 -0.786541 0.121426 0.593400 5.200000
0.886283 -0.831256 -0.711544 0.101375 0.593400 5.200000
0.819163 -0.837479 -0.636537 0.083335 0.593400 5.200000
0.759423 -0.841985 -0.561540 0.067296 0.593400 5.200000
0.707117 -0.845144 -0.486541 0.053272 0.593400 5.200000
0.662265 -0.847258 -0.411535 0.041254 0.593400 5.200000
0.624887 -0.848615 -0.336539 0.031244 0.593400 5.200000
0.594994 -0.849433 -0.261543 0.023243 0.593400 5.200000
0.572602 -0.849888 -0.186538 0.017235 0.591752 5.200000
0.557712 -0.850107 -0.111539 0.013464 0.516547 5.200000
0.550329 -0.850203 -0.036542 0.011958 0.416553 5.200000
0.550387 -0.850210 0.038465 0.011931 0.316550 5.200000
0.557993 -0.850108 0.113462 0.012728 0.216547 5.200000
0.573193 -0.849907 0.193586 0.013713 0.109717 5.200000
0.590139 -0.849671 0.134558 0.014619 0.182762 5.200000
0.599852 -0.849527 0.059387 0.015513 0.283191 5.200000
0.601912 -0.849493 -0.015609 0.015761 0.383194 5.200000
0.596718 -0.849574 -0.090613 0.014781 0.483197 5.200000
0.583886 -0.849739 -0.167392 0.011732 0.573964 5.200000
0.564441 -0.849920 -0.195892 0.006546 0.593400 5.200000
0.549033 -0.849991 -0.116333 0.002422 0.593400 5.200000
