# Supplementary material for: Automatic Parking Controller with a Twin Artificial Neural Network Architecture
Source: Hindawi journal article supplement (doi:10.1155/2019/4801985), 2019-01-01
Supplement: f1 [file 4801985.f1.zip › data/data_187.txt]

7.200000 1.100000 0.000000 0.000000 0.000000 5.200000
7.196324 1.100000 -0.074998 0.000023 -0.006162 5.200000
7.184977 1.100000 -0.149995 0.000146 -0.018336 5.200000
7.166267 1.099998 -0.225004 0.000472 -0.033811 5.200000
7.139985 1.099975 -0.300001 0.001089 -0.049199 5.200000
7.106265 1.099917 -0.374998 0.002082 -0.064443 5.200000
7.064995 1.099805 -0.449995 0.003550 -0.079489 5.200000
7.016258 1.099581 -0.525004 0.005574 -0.094317 5.200000
6.959996 1.099196 -0.600001 0.008235 -0.108876 5.200000
6.896257 1.098564 -0.674999 0.011624 -0.123138 5.200000
6.825010 1.097594 -0.749996 0.015811 -0.137071 5.200000
6.746268 1.096152 -0.825004 0.020880 -0.150657 5.200000
6.660048 1.094096 -0.900002 0.026910 -0.163897 5.200000
6.566342 1.091252 -0.974999 0.033956 -0.176791 5.200000
6.465175 1.087412 -1.049997 0.042091 -0.189376 5.200000
6.356529 1.082331 -1.125003 0.051403 -0.201698 5.200000
6.240477 1.075761 -1.200002 0.061933 -0.213852 5.200000
6.117006 1.067375 -1.275000 0.073775 -0.225952 5.200000
5.986182 1.056849 -1.349998 0.087013 -0.238213 5.200000
5.848044 1.043787 -1.425001 0.101736 -0.250838 5.200000
5.702681 1.027761 -1.500003 0.118070 -0.264170 5.200000
5.550174 1.008285 -1.575001 0.136155 -0.278553 5.200000
5.390637 0.984804 -1.649998 0.156399 -0.300122 5.200000
5.224270 0.956648 -1.724999 0.179373 -0.324875 5.200000
5.051261 0.922979 -1.800004 0.205330 -0.349594 5.200000
4.871940 0.882956 -1.875001 0.234455 -0.374430 5.200000
4.686638 0.835537 -1.951817 0.267115 -0.412272 5.200000
4.496430 0.779688 -1.998207 0.304899 -0.453958 5.200000
4.306918 0.715716 -2.000000 0.346821 -0.482468 5.200000
4.120390 0.643605 -2.000000 0.391503 -0.507020 5.200000
3.937364 0.563006 -2.000000 0.438139 -0.513938 5.200000
3.758171 0.474222 -2.000000 0.480517 -0.444648 5.200000
3.582449 0.378727 -2.000000 0.513638 -0.345131 5.200000
3.409544 0.278230 -2.000000 0.537827 -0.245134 5.200000
3.238652 0.174332 -2.000000 0.553479 -0.145128 5.200000
3.068887 0.068368 -1.994018 0.561258 -0.045130 5.200000
2.901728 -0.036777 -1.940734 0.560891 0.054873 5.200000
2.740289 -0.137421 -1.864927 0.552784 0.154872 5.200000
2.584101 -0.232287 -1.789930 0.537745 0.254868 5.200000
2.432678 -0.320493 -1.714926 0.515862 0.354869 5.200000
2.285659 -0.401246 -1.639924 0.487334 0.454871 5.200000
2.142872 -0.473836 -1.564199 0.452098 0.562374 5.200000
2.003655 -0.538080 -1.499251 0.411812 0.593400 5.200000
1.868643 -0.593943 -1.423686 0.372703 0.593400 5.200000
1.738629 -0.642009 -1.348689 0.335606 0.593400 5.200000
1.614093 -0.683010 -1.273682 0.300509 0.593400 5.200000
1.495436 -0.717644 -1.198685 0.267415 0.593400 5.200000
1.382979 -0.746586 -1.123689 0.236344 0.593400 5.200000
1.277032 -0.770478 -1.048688 0.207272 0.593400 5.200000
1.177808 -0.789944 -0.973685 0.180200 0.593400 5.200000
1.085508 -0.805562 -0.898689 0.155149 0.593400 5.200000
1.000273 -0.817889 -0.823683 0.132093 0.593400 5.200000
0.922240 -0.827429 -0.748685 0.111054 0.593400 5.200000
0.851483 -0.834635 -0.673688 0.092019 0.593400 5.200000
0.788088 -0.839940 -0.598690 0.074984 0.593400 5.200000
0.732099 -0.843727 -0.523683 0.059971 0.593400 5.200000
0.683542 -0.846325 -0.448687 0.046950 0.593400 5.200000
0.642465 -0.848023 -0.373686 0.035952 0.593400 5.200000
0.608864 -0.849085 -0.298688 0.026954 0.593400 5.200000
0.582756 -0.849696 -0.223686 0.019964 0.593400 5.200000
0.564145 -0.850022 -0.148690 0.015012 0.570741 5.200000
0.553040 -0.850168 -0.073684 0.012465 0.466085 5.200000
0.549406 -0.850220 0.001314 0.011801 0.366081 5.200000
0.553292 -0.850172 0.076311 0.012274 0.266079 5.200000
0.564673 -0.850025 0.151309 0.013245 0.166075 5.200000
0.582510 -0.849781 0.172292 0.014145 0.133957 5.200000
0.595974 -0.849585 0.096539 0.015108 0.233663 5.200000
0.601826 -0.849496 0.021537 0.015755 0.333663 5.200000
0.600307 -0.849516 -0.053466 0.015484 0.433666 5.200000
0.591183 -0.849648 -0.128461 0.013551 0.535930 5.200000
0.574577 -0.849843 -0.195781 0.009250 0.585860 5.200000
0.555717 -0.849965 -0.153485 0.004205 0.593400 5.200000
0.544113 -0.850000 -0.078477 0.001102 0.593400 5.200000
