# Supplementary material for: Automatic Parking Controller with a Twin Artificial Neural Network Architecture
Source: Hindawi journal article supplement (doi:10.1155/2019/4801985), 2019-01-01
Supplement: f1 [file 4801985.f1.zip › data/data_188.txt]

6.200000 1.200000 0.000000 0.000000 0.000000 5.200000
6.196257 1.200000 -0.074999 0.000056 -0.040416 5.200000
6.185023 1.199999 -0.149998 0.000399 -0.087185 5.200000
6.166239 1.199981 -0.224998 0.001328 -0.134283 5.200000
6.139996 1.199926 -0.300000 0.003122 -0.182060 5.200000
6.106264 1.199775 -0.375004 0.006089 -0.230813 5.200000
6.064996 1.199433 -0.450004 0.010571 -0.280968 5.200000
6.016256 1.198762 -0.524998 0.016939 -0.333275 5.200000
5.960022 1.197574 -0.600001 0.025615 -0.389099 5.200000
5.896300 1.195586 -0.675001 0.037178 -0.451180 5.200000
5.825124 1.192408 -0.750000 0.052465 -0.521096 5.200000
5.746526 1.187538 -0.824999 0.071644 -0.545832 5.200000
5.660565 1.180417 -0.900001 0.093818 -0.572772 5.200000
5.567352 1.170479 -0.975005 0.118679 -0.576013 5.200000
5.466988 1.157138 -1.049997 0.145564 -0.576029 5.200000
5.359628 1.139817 -1.124999 0.174443 -0.576018 5.200000
5.245473 1.117884 -1.200003 0.205305 -0.575946 5.200000
5.124752 1.090664 -1.275003 0.238170 -0.575889 5.200000
4.997772 1.057485 -1.350002 0.273020 -0.575999 5.200000
4.864886 1.017624 -1.425001 0.309866 -0.576291 5.200000
4.726491 0.970335 -1.500003 0.348786 -0.576374 5.200000
4.583080 0.914966 -1.574999 0.387264 -0.523208 5.200000
4.434882 0.851434 -1.649998 0.421557 -0.448128 5.200000
4.282006 0.779983 -1.725000 0.451945 -0.388055 5.200000
4.124541 0.700817 -1.800004 0.479004 -0.333125 5.200000
3.962530 0.614130 -1.875005 0.502813 -0.280409 5.200000
3.795927 0.520184 -1.951669 0.523282 -0.228529 5.200000
3.625065 0.419601 -1.997993 0.540086 -0.174327 5.200000
3.454209 0.315612 -2.000000 0.552456 -0.117686 5.200000
3.284419 0.209915 -2.000000 0.560426 -0.064757 5.200000
3.115248 0.103218 -1.999904 0.564257 -0.015344 5.200000
2.947166 -0.003216 -1.961656 0.563818 0.031832 5.200000
2.784373 -0.105598 -1.885392 0.557889 0.127441 5.200000
2.627025 -0.202496 -1.810393 0.544716 0.227436 5.200000
2.474541 -0.292938 -1.735391 0.524683 0.327437 5.200000
2.326524 -0.376105 -1.660387 0.497984 0.427438 5.200000
2.182734 -0.451342 -1.585386 0.464655 0.527439 5.200000
2.042789 -0.518146 -1.516308 0.425123 0.593400 5.200000
1.906597 -0.576568 -1.444389 0.385392 0.593400 5.200000
1.775269 -0.626987 -1.369390 0.347737 0.593400 5.200000
1.649269 -0.670126 -1.294392 0.312089 0.593400 5.200000
1.529020 -0.706701 -1.219393 0.278448 0.593400 5.200000
1.414883 -0.737391 -1.144394 0.246813 0.593400 5.200000
1.307166 -0.762837 -1.069385 0.217185 0.593400 5.200000
1.206106 -0.783678 -0.994387 0.189565 0.593400 5.200000
1.111915 -0.800502 -0.919389 0.163956 0.593400 5.200000
1.024752 -0.813864 -0.844390 0.140354 0.593400 5.200000
0.944736 -0.824291 -0.769392 0.118755 0.593400 5.200000
0.871983 -0.832252 -0.694393 0.099169 0.593400 5.200000
0.806560 -0.838182 -0.619393 0.081579 0.593400 5.200000
0.748530 -0.842469 -0.544385 0.066007 0.593400 5.200000
0.697931 -0.845471 -0.469387 0.052443 0.593400 5.200000
0.654792 -0.847484 -0.394389 0.040885 0.593400 5.200000
0.619129 -0.848776 -0.319390 0.031335 0.593400 5.200000
0.590958 -0.849547 -0.244392 0.023790 0.593400 5.200000
0.570261 -0.849985 -0.169393 0.018245 0.581038 5.200000
0.557048 -0.850207 -0.094393 0.015114 0.482108 5.200000
0.551371 -0.850287 -0.019385 0.014055 0.382104 5.200000
0.553166 -0.850264 0.055613 0.014269 0.282106 5.200000
0.562492 -0.850123 0.130611 0.015121 0.182109 5.200000
0.579240 -0.849862 0.195724 0.015987 0.094534 5.200000
0.597195 -0.849570 0.142922 0.016727 0.154967 5.200000
0.607765 -0.849394 0.067923 0.017577 0.254970 5.200000
0.610638 -0.849340 -0.007076 0.017908 0.354971 5.200000
0.606330 -0.849410 -0.082074 0.017136 0.454965 5.200000
0.594378 -0.849607 -0.157078 0.014480 0.559360 5.200000
0.575071 -0.849838 -0.215789 0.009386 0.593400 5.200000
0.555860 -0.849967 -0.154192 0.004243 0.593400 5.200000
0.544188 -0.850000 -0.079192 0.001121 0.593400 5.200000
