# Supplementary material for: Automatic Parking Controller with a Twin Artificial Neural Network Architecture
Source: Hindawi journal article supplement (doi:10.1155/2019/4801985), 2019-01-01
Supplement: f1 [file 4801985.f1.zip › data/data_189.txt]

6.300000 1.200000 0.000000 0.000000 0.000000 5.200000
6.296264 1.200000 -0.075000 0.000048 -0.035181 5.200000
6.285021 1.199999 -0.149999 0.000370 -0.077632 5.200000
6.266242 1.199982 -0.225000 0.001216 -0.120121 5.200000
6.240007 1.199930 -0.299998 0.002841 -0.162890 5.200000
6.206251 1.199790 -0.374997 0.005519 -0.206010 5.200000
6.164993 1.199484 -0.450000 0.009538 -0.249595 5.200000
6.116265 1.198885 -0.525004 0.015187 -0.293816 5.200000
6.060011 1.197822 -0.599996 0.022796 -0.338899 5.200000
5.996290 1.196064 -0.675000 0.032728 -0.385272 5.200000
5.925094 1.193294 -0.750004 0.045387 -0.433731 5.200000
5.846456 1.189102 -0.824996 0.061287 -0.488686 5.200000
5.760430 1.182996 -0.900000 0.080890 -0.520379 5.200000
5.667078 1.174369 -0.975003 0.103648 -0.544860 5.200000
5.566509 1.162602 -1.049996 0.129631 -0.571554 5.200000
5.458895 1.147004 -1.125000 0.158470 -0.576145 5.200000
5.344398 1.126885 -1.200002 0.189337 -0.576652 5.200000
5.223269 1.101603 -1.275001 0.222188 -0.575850 5.200000
5.095774 1.070456 -1.350000 0.257006 -0.573620 5.200000
4.962257 1.032715 -1.425001 0.293940 -0.574970 5.200000
4.823108 0.987751 -1.499999 0.330635 -0.529035 5.200000
4.678586 0.935291 -1.575000 0.364800 -0.475221 5.200000
4.528911 0.875331 -1.649999 0.396598 -0.428366 5.200000
4.374268 0.807813 -1.724998 0.426187 -0.384356 5.200000
4.214819 0.732708 -1.800000 0.453563 -0.341845 5.200000
4.050700 0.650092 -1.874997 0.478608 -0.300092 5.200000
3.881977 0.560043 -1.950003 0.501212 -0.258654 5.200000
3.709098 0.463003 -1.999363 0.521062 -0.214696 5.200000
3.536428 0.361962 -2.000000 0.537196 -0.167447 5.200000
3.365276 0.258489 -2.000000 0.549662 -0.124242 5.200000
3.195246 0.153189 -2.000000 0.558827 -0.085074 5.200000
3.026047 0.046680 -1.998115 0.563787 -0.020395 5.200000
2.860437 -0.057939 -1.920798 0.561570 0.080273 5.200000
2.700611 -0.157533 -1.845767 0.551809 0.180270 5.200000
2.545888 -0.251135 -1.770767 0.534967 0.280268 5.200000
2.395805 -0.337832 -1.695768 0.511402 0.380269 5.200000
2.250048 -0.416872 -1.620769 0.481210 0.480271 5.200000
2.108467 -0.487640 -1.544988 0.444264 0.588419 5.200000
1.970260 -0.550056 -1.480238 0.403849 0.593400 5.200000
1.836579 -0.604155 -1.404766 0.365249 0.593400 5.200000
1.708011 -0.650639 -1.329766 0.328656 0.593400 5.200000
1.585004 -0.690224 -1.254766 0.294069 0.593400 5.200000
1.467945 -0.723602 -1.179766 0.261488 0.593400 5.200000
1.357166 -0.751449 -1.104767 0.230913 0.593400 5.200000
1.252932 -0.774385 -1.029766 0.202345 0.593400 5.200000
1.155479 -0.793031 -0.954766 0.175783 0.593400 5.200000
1.064979 -0.807958 -0.879766 0.151240 0.593400 5.200000
0.981584 -0.819707 -0.804765 0.128691 0.593400 5.200000
0.905391 -0.828775 -0.729765 0.108160 0.593400 5.200000
0.836497 -0.835612 -0.654766 0.089624 0.593400 5.200000
0.774980 -0.840627 -0.579767 0.073104 0.593400 5.200000
0.720870 -0.844195 -0.504766 0.058592 0.593400 5.200000
0.674210 -0.846642 -0.429766 0.046087 0.593400 5.200000
0.635015 -0.848242 -0.354765 0.035588 0.593400 5.200000
0.603312 -0.849232 -0.279765 0.027097 0.593400 5.200000
0.579089 -0.849812 -0.204765 0.020610 0.593244 5.200000
0.562357 -0.850124 -0.129766 0.016285 0.529365 5.200000
0.553079 -0.850263 -0.054767 0.014349 0.429273 5.200000
0.551533 -0.850285 0.020234 0.014069 0.329279 5.200000
0.557170 -0.850205 0.095235 0.014684 0.229275 5.200000
0.570477 -0.850001 0.173517 0.015611 0.124903 5.200000
0.589600 -0.849697 0.181529 0.016343 0.101345 5.200000
0.603700 -0.849465 0.103305 0.017206 0.207794 5.200000
0.610357 -0.849341 0.028305 0.017872 0.307796 5.200000
0.609351 -0.849360 -0.046695 0.017691 0.407799 5.200000
0.600941 -0.849505 -0.121702 0.016018 0.507799 5.200000
0.584981 -0.849732 -0.201403 0.012048 0.589850 5.200000
0.563981 -0.849923 -0.192197 0.006422 0.593400 5.200000
0.548766 -0.849993 -0.114574 0.002343 0.593400 5.200000
