# Supplementary material for: Automatic Parking Controller with a Twin Artificial Neural Network Architecture
Source: Hindawi journal article supplement (doi:10.1155/2019/4801985), 2019-01-01
Supplement: f1 [file 4801985.f1.zip › data/data_190.txt]

6.400000 1.200000 0.000000 0.000000 0.000000 5.200000
6.396273 1.200000 -0.075002 0.000047 -0.031691 5.200000
6.385024 1.199999 -0.150003 0.000345 -0.071340 5.200000
6.366238 1.199983 -0.224996 0.001136 -0.110885 5.200000
6.340005 1.199934 -0.299996 0.002651 -0.150537 5.200000
6.306245 1.199803 -0.374998 0.005156 -0.190291 5.200000
6.265001 1.199520 -0.450000 0.008877 -0.230152 5.200000
6.216258 1.198965 -0.525001 0.014107 -0.270127 5.200000
6.160008 1.197973 -0.600003 0.021097 -0.310219 5.200000
6.096283 1.196356 -0.675001 0.030151 -0.350399 5.200000
6.025083 1.193799 -0.749996 0.041576 -0.390669 5.200000
5.946425 1.189985 -0.824998 0.055687 -0.431544 5.200000
5.860351 1.184465 -0.899999 0.072810 -0.465212 5.200000
5.766920 1.176712 -0.975001 0.092848 -0.489721 5.200000
5.666227 1.166192 -1.050002 0.115774 -0.514440 5.200000
5.558370 1.152234 -1.125004 0.141840 -0.539160 5.200000
5.443550 1.134132 -1.199995 0.171289 -0.564569 5.200000
5.321978 1.111058 -1.274997 0.204040 -0.578657 5.200000
5.193928 1.082234 -1.349999 0.238503 -0.564497 5.200000
5.059716 1.047115 -1.425000 0.273095 -0.533375 5.200000
4.919583 1.005258 -1.500002 0.306805 -0.497758 5.200000
4.773812 0.956407 -1.575004 0.339402 -0.462147 5.200000
4.622645 0.900324 -1.649995 0.370726 -0.426813 5.200000
4.466305 0.836791 -1.724997 0.400637 -0.391839 5.200000
4.305031 0.765725 -1.799998 0.429004 -0.357260 5.200000
4.138983 0.687023 -1.875000 0.455710 -0.323051 5.200000
3.968325 0.600676 -1.952591 0.480613 -0.289457 5.200000
3.793562 0.506946 -1.992706 0.503428 -0.252770 5.200000
3.619402 0.408715 -2.000000 0.523043 -0.211694 5.200000
3.446991 0.307348 -2.000000 0.539447 -0.175072 5.200000
3.276122 0.203405 -2.000000 0.553096 -0.143370 5.200000
3.106439 0.097436 -1.999956 0.562339 -0.068804 5.200000
2.938472 -0.008711 -1.956620 0.563696 0.032678 5.200000
2.775999 -0.110830 -1.881457 0.557337 0.132680 5.200000
2.618919 -0.207390 -1.806456 0.543854 0.232682 5.200000
2.466673 -0.297483 -1.731463 0.523439 0.332685 5.200000
2.318885 -0.380255 -1.656463 0.496400 0.432676 5.200000
2.175318 -0.455042 -1.581455 0.462728 0.532738 5.200000
2.035535 -0.521421 -1.513365 0.422970 0.593400 5.200000
1.899589 -0.579404 -1.440458 0.383369 0.593400 5.200000
1.768529 -0.629423 -1.365460 0.345820 0.593400 5.200000
1.642823 -0.672200 -1.290461 0.310277 0.593400 5.200000
1.522886 -0.708448 -1.215463 0.276741 0.593400 5.200000
1.409078 -0.738848 -1.140464 0.245211 0.593400 5.200000
1.301702 -0.764038 -1.065455 0.215688 0.593400 5.200000
1.200997 -0.784655 -0.990456 0.188172 0.593400 5.200000
1.107170 -0.801284 -0.915458 0.162669 0.593400 5.200000
1.020380 -0.814479 -0.840460 0.139172 0.593400 5.200000
0.940743 -0.824765 -0.765461 0.117679 0.593400 5.200000
0.868374 -0.832608 -0.690463 0.098198 0.593400 5.200000
0.803337 -0.838443 -0.615464 0.080714 0.593400 5.200000
0.745693 -0.842655 -0.540455 0.065246 0.593400 5.200000
0.695483 -0.845599 -0.465456 0.051786 0.593400 5.200000
0.652733 -0.847567 -0.390458 0.040334 0.593400 5.200000
0.617464 -0.848827 -0.315460 0.030889 0.593400 5.200000
0.589688 -0.849577 -0.240461 0.023450 0.593400 5.200000
0.569395 -0.850001 -0.165463 0.018023 0.578736 5.200000
0.556573 -0.850214 -0.090463 0.015017 0.476868 5.200000
0.551269 -0.850288 -0.015455 0.014038 0.376865 5.200000
0.553491 -0.850259 0.059544 0.014307 0.276865 5.200000
0.563195 -0.850112 0.134542 0.015172 0.176870 5.200000
0.580307 -0.849846 0.195085 0.016021 0.094660 5.200000
0.597930 -0.849558 0.138992 0.016774 0.160207 5.200000
0.608083 -0.849388 0.063993 0.017610 0.260210 5.200000
0.610646 -0.849340 -0.011006 0.017910 0.360212 5.200000
0.605876 -0.849418 -0.086004 0.017049 0.460205 5.200000
0.593539 -0.849619 -0.161007 0.014270 0.565322 5.200000
0.573895 -0.849848 -0.214318 0.009072 0.593400 5.200000
0.555061 -0.849971 -0.150262 0.004029 0.593400 5.200000
0.543792 -0.850000 -0.075262 0.001015 0.593400 5.200000
