# Supplementary material for: Automatic Parking Controller with a Twin Artificial Neural Network Architecture
Source: Hindawi journal article supplement (doi:10.1155/2019/4801985), 2019-01-01
Supplement: f1 [file 4801985.f1.zip › data/data_191.txt]

6.500000 1.200000 0.000000 0.000000 0.000000 5.200000
6.496278 1.200000 -0.074999 0.000045 -0.028949 5.200000
6.485022 1.200000 -0.150000 0.000332 -0.066445 5.200000
6.466242 1.199983 -0.224998 0.001077 -0.103746 5.200000
6.440013 1.199938 -0.300001 0.002519 -0.141064 5.200000
6.406242 1.199815 -0.374996 0.004873 -0.178352 5.200000
6.365002 1.199544 -0.450001 0.008388 -0.215579 5.200000
6.316255 1.199018 -0.524996 0.013300 -0.252684 5.200000
6.260010 1.198091 -0.600002 0.019852 -0.289598 5.200000
6.196282 1.196571 -0.674995 0.028290 -0.326176 5.200000
6.125066 1.194179 -0.750001 0.038897 -0.362287 5.200000
6.046405 1.190620 -0.825003 0.051898 -0.395460 5.200000
5.960302 1.185478 -0.900001 0.067371 -0.419828 5.200000
5.866824 1.178345 -0.975002 0.085289 -0.444546 5.200000
5.766045 1.168701 -1.050002 0.105885 -0.469264 5.200000
5.658042 1.155950 -1.125000 0.129370 -0.493981 5.200000
5.542974 1.139438 -1.200002 0.155965 -0.518964 5.200000
5.421027 1.118412 -1.274999 0.185576 -0.530457 5.200000
5.292434 1.092183 -1.350003 0.216875 -0.523483 5.200000
5.157441 1.060142 -1.424998 0.248993 -0.506541 5.200000
5.016306 1.021798 -1.500003 0.281256 -0.483808 5.200000
4.869314 0.976750 -1.574997 0.313222 -0.457825 5.200000
4.716722 0.924627 -1.650003 0.344586 -0.430223 5.200000
4.558802 0.865187 -1.724997 0.375110 -0.401973 5.200000
4.395794 0.798160 -1.800004 0.404622 -0.373612 5.200000
4.227950 0.723404 -1.874997 0.432997 -0.345507 5.200000
4.055473 0.640778 -1.950003 0.460129 -0.317901 5.200000
3.879025 0.550437 -1.999887 0.485740 -0.287472 5.200000
3.703183 0.454965 -2.000000 0.508585 -0.251267 5.200000
3.529509 0.355793 -2.000000 0.528567 -0.219822 5.200000
3.357710 0.253394 -2.000000 0.546023 -0.189060 5.200000
3.187528 0.148342 -2.000000 0.558818 -0.113621 5.200000
3.018384 0.041829 -1.990871 0.563669 -0.015142 5.200000
2.852983 -0.062621 -1.917322 0.561262 0.084855 5.200000
2.693400 -0.161975 -1.842326 0.551170 0.184863 5.200000
2.538896 -0.255262 -1.767322 0.534056 0.284859 5.200000
2.389020 -0.341634 -1.692326 0.510157 0.384858 5.200000
2.243452 -0.420315 -1.617323 0.479666 0.484860 5.200000
2.102058 -0.490685 -1.541712 0.442429 0.591256 5.200000
1.964019 -0.552717 -1.476654 0.402033 0.593400 5.200000
1.830561 -0.606451 -1.401324 0.363525 0.593400 5.200000
1.702239 -0.652603 -1.326324 0.327024 0.593400 5.200000
1.579497 -0.691887 -1.251324 0.292529 0.593400 5.200000
1.462722 -0.724995 -1.176324 0.260041 0.593400 5.200000
1.352238 -0.752603 -1.101324 0.229558 0.593400 5.200000
1.248309 -0.775331 -1.026324 0.201082 0.593400 5.200000
1.151171 -0.793794 -0.951324 0.174612 0.593400 5.200000
1.060994 -0.808564 -0.876324 0.150161 0.593400 5.200000
0.977927 -0.820179 -0.801323 0.127704 0.593400 5.200000
0.902070 -0.829134 -0.726323 0.107266 0.593400 5.200000
0.833514 -0.835878 -0.651323 0.088822 0.593400 5.200000
0.772335 -0.840819 -0.576324 0.072395 0.593400 5.200000
0.718564 -0.844329 -0.501324 0.057974 0.593400 5.200000
0.672245 -0.846732 -0.426324 0.045561 0.593400 5.200000
0.633393 -0.848300 -0.351323 0.035154 0.593400 5.200000
0.602035 -0.849266 -0.276323 0.026755 0.593400 5.200000
0.578160 -0.849831 -0.201323 0.020360 0.592849 5.200000
0.561782 -0.850133 -0.126323 0.016152 0.524684 5.200000
0.552849 -0.850266 -0.051324 0.014307 0.424682 5.200000
0.551622 -0.850284 0.023676 0.014081 0.324689 5.200000
0.557625 -0.850197 0.098677 0.014726 0.224685 5.200000
0.571280 -0.849988 0.178059 0.015651 0.118846 5.200000
0.590409 -0.849684 0.178492 0.016378 0.105123 5.200000
0.604159 -0.849457 0.099862 0.017245 0.212384 5.200000
0.610418 -0.849340 0.024863 0.017880 0.312386 5.200000
0.609121 -0.849364 -0.050137 0.017652 0.412389 5.200000
0.600368 -0.849515 -0.125145 0.015890 0.512389 5.200000
0.584056 -0.849743 -0.205668 0.011798 0.590830 5.200000
0.563114 -0.849928 -0.188676 0.006190 0.593400 5.200000
0.548245 -0.849994 -0.111131 0.002204 0.593400 5.200000
