# Supplementary material for: Automatic Parking Controller with a Twin Artificial Neural Network Architecture
Source: Hindawi journal article supplement (doi:10.1155/2019/4801985), 2019-01-01
Supplement: f1 [file 4801985.f1.zip › data/data_192.txt]

6.600000 1.200000 0.000000 0.000000 0.000000 5.200000
6.596280 1.200000 -0.075004 0.000043 -0.026102 5.200000
6.585025 1.200000 -0.149997 0.000310 -0.061395 5.200000
6.566243 1.199984 -0.225001 0.001023 -0.096408 5.200000
6.540008 1.199941 -0.300003 0.002370 -0.131352 5.200000
6.506237 1.199826 -0.374998 0.004594 -0.166157 5.200000
6.465011 1.199571 -0.450003 0.007881 -0.200762 5.200000
6.416251 1.199077 -0.524997 0.012483 -0.235078 5.200000
6.360015 1.198214 -0.600000 0.018588 -0.268954 5.200000
6.296276 1.196778 -0.675003 0.026441 -0.302221 5.200000
6.225060 1.194555 -0.749996 0.036245 -0.333118 5.200000
6.146383 1.191246 -0.825001 0.048103 -0.358114 5.200000
6.060261 1.186497 -0.900005 0.062072 -0.382827 5.200000
5.966751 1.179942 -0.974997 0.078330 -0.407546 5.200000
5.865882 1.171078 -1.050002 0.097095 -0.432267 5.200000
5.757765 1.159394 -1.125002 0.118559 -0.457215 5.200000
5.642505 1.144249 -1.199999 0.142840 -0.477461 5.200000
5.520268 1.125022 -1.275003 0.169447 -0.484594 5.200000
5.391231 1.101054 -1.349996 0.197842 -0.484113 5.200000
5.255609 1.071763 -1.425000 0.227513 -0.476478 5.200000
5.113660 1.036603 -1.500003 0.257964 -0.463178 5.200000
4.965617 0.995077 -1.574997 0.288752 -0.445857 5.200000
4.811790 0.946770 -1.650001 0.319551 -0.426059 5.200000
4.652418 0.891291 -1.725006 0.350088 -0.404882 5.200000
4.487812 0.828343 -1.799998 0.380182 -0.383190 5.200000
4.318218 0.757611 -1.875002 0.409707 -0.361581 5.200000
4.143918 0.678870 -1.952974 0.438586 -0.340916 5.200000
3.965565 0.592115 -1.990426 0.466540 -0.316412 5.200000
3.788202 0.499866 -2.000000 0.492150 -0.285444 5.200000
3.613068 0.403299 -2.000000 0.515335 -0.259381 5.200000
3.440109 0.302864 -2.000000 0.536501 -0.235440 5.200000
3.269139 0.199097 -2.000000 0.553409 -0.164303 5.200000
3.099515 0.093065 -2.000000 0.562585 -0.063213 5.200000
2.931689 -0.012993 -1.955017 0.563583 0.036793 5.200000
2.769438 -0.114922 -1.878374 0.556899 0.136788 5.200000
2.612566 -0.211233 -1.803381 0.543143 0.236793 5.200000
2.460515 -0.301028 -1.728377 0.522472 0.336787 5.200000
2.312905 -0.383489 -1.653379 0.495145 0.436793 5.200000
2.169506 -0.457930 -1.578302 0.461199 0.537592 5.200000
2.029854 -0.523972 -1.510987 0.421286 0.593400 5.200000
1.894102 -0.581612 -1.437375 0.381787 0.593400 5.200000
1.763253 -0.631320 -1.362377 0.344320 0.593400 5.200000
1.637777 -0.673814 -1.287378 0.308859 0.593400 5.200000
1.518086 -0.709807 -1.212380 0.275406 0.593400 5.200000
1.404538 -0.739980 -1.137381 0.243958 0.593400 5.200000
1.297430 -0.764970 -1.062372 0.214518 0.593400 5.200000
1.197004 -0.785413 -0.987373 0.187084 0.593400 5.200000
1.103461 -0.801891 -0.912375 0.161664 0.593400 5.200000
1.016964 -0.814957 -0.837377 0.138248 0.593400 5.200000
0.937624 -0.825133 -0.762379 0.116839 0.593400 5.200000
0.865557 -0.832885 -0.687380 0.097440 0.593400 5.200000
0.800825 -0.838645 -0.612381 0.080039 0.593400 5.200000
0.743483 -0.842799 -0.537372 0.064653 0.593400 5.200000
0.693577 -0.845698 -0.462373 0.051276 0.593400 5.200000
0.651134 -0.847631 -0.387375 0.039905 0.593400 5.200000
0.616172 -0.848866 -0.312377 0.030542 0.593400 5.200000
0.588705 -0.849600 -0.237379 0.023186 0.593400 5.200000
0.568726 -0.850013 -0.162380 0.017853 0.576188 5.200000
0.556222 -0.850220 -0.087381 0.014946 0.472758 5.200000
0.551210 -0.850289 -0.012372 0.014028 0.372755 5.200000
0.553758 -0.850256 0.062627 0.014337 0.272755 5.200000
0.563761 -0.850104 0.137625 0.015211 0.172760 5.200000
0.581153 -0.849832 0.194454 0.016048 0.094789 5.200000
0.598496 -0.849549 0.135910 0.016811 0.164316 5.200000
0.608329 -0.849383 0.060910 0.017636 0.264320 5.200000
0.610650 -0.849340 -0.014089 0.017910 0.364322 5.200000
0.605511 -0.849424 -0.089087 0.016977 0.464315 5.200000
0.592867 -0.849628 -0.164089 0.014102 0.569649 5.200000
0.572972 -0.849856 -0.212989 0.008826 0.593400 5.200000
0.554445 -0.849974 -0.147180 0.003864 0.593400 5.200000
