# Supplementary material for: Automatic Parking Controller with a Twin Artificial Neural Network Architecture
Source: Hindawi journal article supplement (doi:10.1155/2019/4801985), 2019-01-01
Supplement: f1 [file 4801985.f1.zip › data/data_193.txt]

6.700000 1.200000 0.000000 0.000000 0.000000 5.200000
6.696289 1.200000 -0.074998 0.000041 -0.023085 5.200000
6.685011 1.200000 -0.149996 0.000299 -0.056054 5.200000
6.666247 1.199985 -0.225004 0.000954 -0.088653 5.200000
6.640014 1.199944 -0.300001 0.002220 -0.121129 5.200000
6.606240 1.199837 -0.374998 0.004295 -0.153374 5.200000
6.565007 1.199596 -0.449998 0.007355 -0.185322 5.200000
6.516245 1.199140 -0.525004 0.011631 -0.216838 5.200000
6.460014 1.198333 -0.600002 0.017280 -0.247896 5.200000
6.396264 1.196999 -0.674999 0.024531 -0.276019 5.200000
6.325058 1.194943 -0.749997 0.033447 -0.300804 5.200000
6.246362 1.191894 -0.825004 0.044170 -0.325519 5.200000
6.160224 1.187550 -0.900002 0.056857 -0.350242 5.200000
6.066665 1.181534 -0.975000 0.071708 -0.374955 5.200000
5.965741 1.173428 -1.049997 0.088909 -0.399841 5.200000
5.857522 1.162723 -1.125006 0.108588 -0.421780 5.200000
5.742101 1.148862 -1.200003 0.130579 -0.435329 5.200000
5.619613 1.131282 -1.275001 0.154619 -0.443908 5.200000
5.490198 1.109394 -1.349998 0.180480 -0.447162 5.200000
5.354065 1.082636 -1.425007 0.207820 -0.445484 5.200000
5.211405 1.050408 -1.500004 0.236327 -0.439084 5.200000
5.062486 1.012227 -1.575002 0.265636 -0.429172 5.200000
4.907540 0.967556 -1.649999 0.295479 -0.416673 5.200000
4.746878 0.915990 -1.725000 0.325616 -0.402652 5.200000
4.580770 0.857060 -1.800005 0.355886 -0.387944 5.200000
4.409543 0.790429 -1.875002 0.386182 -0.373342 5.200000
4.233501 0.715700 -1.950029 0.416468 -0.359541 5.200000
4.053463 0.632783 -2.000000 0.446507 -0.342580 5.200000
3.874248 0.543804 -2.000000 0.474751 -0.317033 5.200000
3.697598 0.450030 -2.000000 0.500994 -0.296618 5.200000
3.523391 0.351801 -2.000000 0.525658 -0.280635 5.200000
3.351493 0.249571 -2.000000 0.546152 -0.207412 5.200000
3.181326 0.144483 -2.000000 0.559075 -0.111518 5.200000
3.012177 0.037893 -1.985228 0.563875 -0.011521 5.200000
2.847107 -0.066305 -1.914608 0.561116 0.088477 5.200000
2.687727 -0.165472 -1.839611 0.550654 0.188483 5.200000
2.533396 -0.258512 -1.764613 0.533310 0.288479 5.200000
2.383682 -0.344626 -1.689606 0.509166 0.388476 5.200000
2.238265 -0.423006 -1.614608 0.478434 0.488484 5.200000
2.097005 -0.493076 -1.539205 0.440983 0.592684 5.200000
1.959104 -0.554803 -1.473830 0.400604 0.593400 5.200000
1.825823 -0.608251 -1.398610 0.362168 0.593400 5.200000
1.697695 -0.654141 -1.323609 0.325740 0.593400 5.200000
1.575163 -0.693189 -1.248609 0.291318 0.593400 5.200000
1.458611 -0.726086 -1.173609 0.258902 0.593400 5.200000
1.348362 -0.753505 -1.098609 0.228492 0.593400 5.200000
1.244674 -0.776070 -1.023610 0.200089 0.593400 5.200000
1.147784 -0.794391 -0.948610 0.173691 0.593400 5.200000
1.057861 -0.809037 -0.873609 0.149313 0.593400 5.200000
0.975053 -0.820547 -0.798609 0.126929 0.593400 5.200000
0.899460 -0.829414 -0.723609 0.106563 0.593400 5.200000
0.831172 -0.836086 -0.648609 0.088192 0.593400 5.200000
0.770261 -0.840968 -0.573609 0.071838 0.593400 5.200000
0.716758 -0.844434 -0.498609 0.057490 0.593400 5.200000
0.670708 -0.846802 -0.423609 0.045149 0.593400 5.200000
0.632125 -0.848345 -0.348609 0.034815 0.593400 5.200000
0.601038 -0.849293 -0.273608 0.026488 0.593400 5.200000
0.577436 -0.849845 -0.198608 0.020164 0.592379 5.200000
0.561336 -0.850141 -0.123608 0.016051 0.521064 5.200000
0.552687 -0.850269 -0.048609 0.014279 0.421062 5.200000
0.551696 -0.850283 0.026391 0.014090 0.321069 5.200000
0.557994 -0.850192 0.101391 0.014759 0.221065 5.200000
0.571924 -0.849978 0.181517 0.015683 0.114234 5.200000
0.591040 -0.849673 0.175807 0.016406 0.108682 5.200000
0.604516 -0.849451 0.097147 0.017276 0.216004 5.200000
0.610446 -0.849340 0.022148 0.017883 0.316006 5.200000
0.608939 -0.849366 -0.052851 0.017620 0.416009 5.200000
0.599907 -0.849523 -0.127860 0.015787 0.516010 5.200000
0.583318 -0.849752 -0.208769 0.011599 0.591506 5.200000
0.562439 -0.849933 -0.185753 0.006009 0.593400 5.200000
0.547843 -0.849995 -0.108415 0.002097 0.593400 5.200000
