# Supplementary material for: Automatic Parking Controller with a Twin Artificial Neural Network Architecture
Source: Hindawi journal article supplement (doi:10.1155/2019/4801985), 2019-01-01
Supplement: f1 [file 4801985.f1.zip › data/data_194.txt]

6.800000 1.200000 0.000000 0.000000 0.000000 5.200000
6.796295 1.200000 -0.075004 0.000036 -0.020029 5.200000
6.785011 1.200000 -0.149996 0.000279 -0.050676 5.200000
6.766251 1.199985 -0.225000 0.000895 -0.080877 5.200000
6.740009 1.199947 -0.300003 0.002069 -0.110893 5.200000
6.706243 1.199847 -0.375000 0.003997 -0.140643 5.200000
6.665012 1.199630 -0.449999 0.006841 -0.170013 5.200000
6.616251 1.199201 -0.525003 0.010785 -0.198662 5.200000
6.560011 1.198454 -0.599995 0.015979 -0.223923 5.200000
6.496268 1.197228 -0.674999 0.022545 -0.248646 5.200000
6.425048 1.195340 -0.750002 0.030622 -0.273368 5.200000
6.346339 1.192554 -0.824998 0.040401 -0.298084 5.200000
6.260190 1.188572 -0.899999 0.052034 -0.322805 5.200000
6.166591 1.183068 -0.975002 0.065730 -0.347732 5.200000
6.065625 1.175630 -1.050003 0.081550 -0.368292 5.200000
5.957315 1.165811 -1.124998 0.099449 -0.384722 5.200000
5.841773 1.153130 -1.200002 0.119368 -0.397888 5.200000
5.719061 1.137052 -1.274996 0.141212 -0.407426 5.200000
5.589354 1.117061 -1.349998 0.164837 -0.413113 5.200000
5.452782 1.092570 -1.425001 0.190039 -0.415047 5.200000
5.309554 1.063049 -1.500001 0.216591 -0.413661 5.200000
5.159864 1.027924 -1.574998 0.244274 -0.409344 5.200000
5.003988 0.986698 -1.650001 0.272875 -0.402972 5.200000
4.842176 0.938827 -1.725005 0.302238 -0.395267 5.200000
4.674723 0.883842 -1.799997 0.332232 -0.387076 5.200000
4.501972 0.821258 -1.875001 0.362805 -0.379184 5.200000
4.324238 0.750591 -1.953231 0.394008 -0.372787 5.200000
4.142337 0.671555 -1.989861 0.425630 -0.362262 5.200000
3.961550 0.586236 -2.000000 0.455978 -0.342948 5.200000
3.783283 0.495568 -2.000000 0.484842 -0.328475 5.200000
3.607664 0.399887 -2.000000 0.512631 -0.315328 5.200000
3.434630 0.299606 -2.000000 0.536892 -0.252215 5.200000
3.263717 0.195737 -2.000000 0.553866 -0.160512 5.200000
3.094147 0.089696 -1.999798 0.562552 -0.060025 5.200000
2.926456 -0.016307 -1.953062 0.563306 0.039974 5.200000
2.764372 -0.118065 -1.875998 0.556626 0.139973 5.200000
2.607663 -0.214198 -1.800994 0.542572 0.239973 5.200000
2.455755 -0.303756 -1.725991 0.521723 0.339972 5.200000
2.308279 -0.385993 -1.650995 0.494166 0.439971 5.200000
2.165022 -0.460157 -1.575810 0.459997 0.541881 5.200000
2.025465 -0.525935 -1.509092 0.419988 0.593400 5.200000
1.889863 -0.583312 -1.434990 0.380564 0.593400 5.200000
1.759178 -0.632780 -1.359991 0.343161 0.593400 5.200000
1.633879 -0.675056 -1.284993 0.307765 0.593400 5.200000
1.514379 -0.710853 -1.209995 0.274375 0.593400 5.200000
1.401032 -0.740851 -1.134996 0.242991 0.593400 5.200000
1.294134 -0.765686 -1.059987 0.213614 0.593400 5.200000
1.193922 -0.785995 -0.984988 0.186244 0.593400 5.200000
1.100601 -0.802356 -0.909990 0.160889 0.593400 5.200000
1.014330 -0.815323 -0.834991 0.137536 0.593400 5.200000
0.935219 -0.825415 -0.759993 0.116191 0.593400 5.200000
0.863384 -0.833096 -0.684995 0.096855 0.593400 5.200000
0.798889 -0.838799 -0.609996 0.079519 0.593400 5.200000
0.741783 -0.842909 -0.534987 0.064197 0.593400 5.200000
0.692112 -0.845773 -0.459988 0.050883 0.593400 5.200000
0.649905 -0.847680 -0.384990 0.039576 0.593400 5.200000
0.615181 -0.848895 -0.309991 0.030277 0.593400 5.200000
0.587951 -0.849617 -0.234993 0.022985 0.593400 5.200000
0.568214 -0.850022 -0.159995 0.017723 0.573798 5.200000
0.555960 -0.850223 -0.084996 0.014895 0.469578 5.200000
0.551180 -0.850290 -0.009987 0.014023 0.369575 5.200000
0.553971 -0.850253 0.065012 0.014361 0.269574 5.200000
0.564208 -0.850097 0.140010 0.015242 0.169580 5.200000
0.581810 -0.849822 0.193894 0.016068 0.094907 5.200000
0.598928 -0.849542 0.133526 0.016841 0.167496 5.200000
0.608520 -0.849379 0.058526 0.017657 0.267500 5.200000
0.610649 -0.849340 -0.016474 0.017910 0.367502 5.200000
0.605224 -0.849429 -0.091473 0.016920 0.467495 5.200000
0.592339 -0.849635 -0.166474 0.013969 0.572721 5.200000
0.572259 -0.849862 -0.211873 0.008636 0.593400 5.200000
0.553977 -0.849976 -0.144796 0.003738 0.593400 5.200000
