# Supplementary material for: Automatic Parking Controller with a Twin Artificial Neural Network Architecture
Source: Hindawi journal article supplement (doi:10.1155/2019/4801985), 2019-01-01
Supplement: f1 [file 4801985.f1.zip › data/data_195.txt]

6.900000 1.200000 0.000000 0.000000 0.000000 5.200000
6.896303 1.200000 -0.075002 0.000035 -0.017343 5.200000
6.884995 1.200000 -0.150005 0.000260 -0.045462 5.200000
6.866257 1.199986 -0.225002 0.000834 -0.073360 5.200000
6.840000 1.199950 -0.299999 0.001927 -0.101045 5.200000
6.806253 1.199862 -0.375002 0.003708 -0.127961 5.200000
6.765005 1.199651 -0.450004 0.006321 -0.152955 5.200000
6.716252 1.199264 -0.525001 0.009903 -0.177689 5.200000
6.660011 1.198573 -0.599999 0.014609 -0.202411 5.200000
6.596267 1.197455 -0.675001 0.020594 -0.227123 5.200000
6.525036 1.195730 -0.750003 0.028029 -0.251836 5.200000
6.446332 1.193172 -0.825000 0.037073 -0.276467 5.200000
6.360162 1.189526 -0.899998 0.047860 -0.298825 5.200000
6.266543 1.184456 -0.975000 0.060430 -0.318521 5.200000
6.165526 1.177625 -1.050002 0.074832 -0.336194 5.200000
6.057150 1.168622 -1.125000 0.091102 -0.351538 5.200000
5.941489 1.157005 -1.199997 0.109227 -0.364299 5.200000
5.818615 1.142301 -1.274999 0.129146 -0.374296 5.200000
5.688647 1.123993 -1.350002 0.150787 -0.381459 5.200000
5.551729 1.101571 -1.424999 0.174010 -0.385889 5.200000
5.408008 1.074477 -1.499996 0.198695 -0.387827 5.200000
5.257701 1.042176 -1.574999 0.224688 -0.387720 5.200000
5.101006 1.004114 -1.650001 0.251873 -0.386063 5.200000
4.938201 0.959758 -1.724998 0.280149 -0.383571 5.200000
4.769558 0.908551 -1.799996 0.309470 -0.380988 5.200000
4.595417 0.849940 -1.874998 0.339847 -0.379077 5.200000
4.416134 0.783354 -1.950010 0.371380 -0.378887 5.200000
4.232640 0.708426 -2.000000 0.403986 -0.376264 5.200000
4.049940 0.626818 -2.000000 0.435938 -0.362302 5.200000
3.869983 0.539568 -2.000000 0.466899 -0.353815 5.200000
3.692789 0.446828 -2.000000 0.497402 -0.350981 5.200000
3.518436 0.348875 -2.000000 0.525561 -0.303949 5.200000
3.346578 0.246590 -2.000000 0.546657 -0.208613 5.200000
3.176452 0.141425 -2.000000 0.559393 -0.108608 5.200000
3.007271 0.034798 -1.986704 0.564028 -0.008608 5.200000
2.842394 -0.069276 -1.912429 0.560907 0.091391 5.200000
2.683163 -0.168265 -1.837427 0.550250 0.191391 5.200000
2.528977 -0.261126 -1.762430 0.532694 0.291391 5.200000
2.379384 -0.347005 -1.687432 0.508366 0.391391 5.200000
2.234091 -0.425175 -1.612430 0.477441 0.491390 5.200000
2.092945 -0.494990 -1.537245 0.439821 0.593281 5.200000
1.955157 -0.556472 -1.471569 0.399457 0.593400 5.200000
1.822019 -0.609690 -1.396428 0.361080 0.593400 5.200000
1.694048 -0.655371 -1.321427 0.324709 0.593400 5.200000
1.571685 -0.694230 -1.246427 0.290346 0.593400 5.200000
1.455312 -0.726959 -1.171427 0.257989 0.593400 5.200000
1.345251 -0.754227 -1.096426 0.227638 0.593400 5.200000
1.241758 -0.776660 -1.021427 0.199293 0.593400 5.200000
1.145068 -0.794866 -0.946427 0.172953 0.593400 5.200000
1.055350 -0.809414 -0.871427 0.148633 0.593400 5.200000
0.972750 -0.820841 -0.796427 0.126307 0.593400 5.200000
0.897369 -0.829638 -0.721426 0.106000 0.593400 5.200000
0.829296 -0.836251 -0.646426 0.087688 0.593400 5.200000
0.768601 -0.841087 -0.571426 0.071393 0.593400 5.200000
0.715313 -0.844517 -0.496427 0.057103 0.593400 5.200000
0.669479 -0.846857 -0.421427 0.044820 0.593400 5.200000
0.631113 -0.848381 -0.346427 0.034544 0.593400 5.200000
0.600244 -0.849314 -0.271426 0.026276 0.593400 5.200000
0.576860 -0.849857 -0.196426 0.020008 0.591908 5.200000
0.560982 -0.850146 -0.121426 0.015971 0.518154 5.200000
0.552572 -0.850270 -0.046426 0.014259 0.418152 5.200000
0.551758 -0.850282 0.028573 0.014098 0.318159 5.200000
0.558297 -0.850187 0.103573 0.014785 0.218156 5.200000
0.572448 -0.849970 0.184163 0.015708 0.110705 5.200000
0.591542 -0.849665 0.173496 0.016429 0.111846 5.200000
0.604799 -0.849446 0.094964 0.017300 0.218915 5.200000
0.610467 -0.849340 0.019965 0.017886 0.318916 5.200000
0.608794 -0.849369 -0.055034 0.017595 0.418918 5.200000
0.599531 -0.849529 -0.130043 0.015702 0.518920 5.200000
0.582721 -0.849760 -0.211039 0.011437 0.591983 5.200000
0.561904 -0.849936 -0.183334 0.005865 0.593400 5.200000
0.547525 -0.849995 -0.106232 0.002012 0.593400 5.200000
