# Supplementary material for: Automatic Parking Controller with a Twin Artificial Neural Network Architecture
Source: Hindawi journal article supplement (doi:10.1155/2019/4801985), 2019-01-01
Supplement: f1 [file 4801985.f1.zip › data/data_196.txt]

7.000000 1.200000 0.000000 0.000000 0.000000 5.200000
6.996308 1.200000 -0.075002 0.000033 -0.014627 5.200000
6.984994 1.200000 -0.150003 0.000242 -0.039439 5.200000
6.966260 1.199986 -0.225000 0.000758 -0.064162 5.200000
6.939997 1.199953 -0.299997 0.001755 -0.088884 5.200000
6.906252 1.199869 -0.374999 0.003359 -0.113591 5.200000
6.864996 1.199689 -0.450000 0.005734 -0.138280 5.200000
6.816257 1.199329 -0.525003 0.009024 -0.162883 5.200000
6.760003 1.198702 -0.600004 0.013384 -0.187057 5.200000
6.696270 1.197679 -0.675000 0.018940 -0.209966 5.200000
6.625025 1.196082 -0.749998 0.025818 -0.231899 5.200000
6.546323 1.193734 -0.825001 0.034120 -0.252708 5.200000
6.460125 1.190376 -0.900000 0.043952 -0.272232 5.200000
6.366506 1.185725 -0.974996 0.055399 -0.290235 5.200000
6.265441 1.179467 -1.050004 0.068503 -0.306544 5.200000
6.157012 1.171232 -1.124999 0.083311 -0.320964 5.200000
6.041240 1.160607 -1.199999 0.099817 -0.333369 5.200000
5.918232 1.147164 -1.275002 0.118018 -0.343664 5.200000
5.788043 1.130423 -1.350000 0.137851 -0.351854 5.200000
5.650837 1.109902 -1.424996 0.159252 -0.358053 5.200000
5.506707 1.085059 -1.500004 0.182165 -0.362510 5.200000
5.355857 1.055375 -1.575000 0.206504 -0.365548 5.200000
5.198474 1.020291 -1.650001 0.232204 -0.367671 5.200000
5.034794 0.979249 -1.725003 0.259253 -0.369465 5.200000
4.865093 0.931659 -1.800000 0.287669 -0.371630 5.200000
4.689701 0.876912 -1.874996 0.317537 -0.375014 5.200000
4.508952 0.814346 -1.953499 0.349058 -0.381562 5.200000
4.323727 0.743447 -1.989770 0.382204 -0.383880 5.200000
4.139504 0.665833 -2.000000 0.415237 -0.376659 5.200000
3.957850 0.582178 -2.000000 0.447878 -0.374402 5.200000
3.779021 0.492640 -2.000000 0.480731 -0.378319 5.200000
3.603206 0.397306 -2.000000 0.512283 -0.341029 5.200000
3.430205 0.296977 -2.000000 0.537442 -0.258657 5.200000
3.259341 0.193027 -2.000000 0.554201 -0.157436 5.200000
3.089714 0.086901 -1.998328 0.562690 -0.057442 5.200000
2.922176 -0.019021 -1.949486 0.563198 0.042562 5.200000
2.760246 -0.120629 -1.874050 0.556367 0.142560 5.200000
2.603669 -0.216610 -1.799052 0.542107 0.242561 5.200000
2.451883 -0.305981 -1.724049 0.521091 0.342557 5.200000
2.304521 -0.388022 -1.649050 0.493358 0.442558 5.200000
2.161370 -0.461955 -1.573754 0.459016 0.545664 5.200000
2.021894 -0.527526 -1.507504 0.418935 0.593400 5.200000
1.886413 -0.584690 -1.433047 0.379570 0.593400 5.200000
1.755862 -0.633963 -1.358048 0.342219 0.593400 5.200000
1.630709 -0.676063 -1.283050 0.306875 0.593400 5.200000
1.511365 -0.711700 -1.208052 0.273537 0.593400 5.200000
1.398182 -0.741556 -1.133054 0.242205 0.593400 5.200000
1.291454 -0.766266 -1.058045 0.212880 0.593400 5.200000
1.191417 -0.786466 -0.983045 0.185562 0.593400 5.200000
1.098276 -0.802733 -0.908047 0.160259 0.593400 5.200000
1.012190 -0.815618 -0.833049 0.136958 0.593400 5.200000
0.933266 -0.825642 -0.758050 0.115665 0.593400 5.200000
0.861621 -0.833267 -0.683052 0.096381 0.593400 5.200000
0.797318 -0.838924 -0.608054 0.079097 0.593400 5.200000
0.740404 -0.842997 -0.533044 0.063828 0.593400 5.200000
0.690925 -0.845833 -0.458045 0.050565 0.593400 5.200000
0.648910 -0.847719 -0.383047 0.039309 0.593400 5.200000
0.614379 -0.848919 -0.308049 0.030062 0.593400 5.200000
0.587343 -0.849631 -0.233050 0.022822 0.593400 5.200000
0.567801 -0.850030 -0.158052 0.017618 0.571613 5.200000
0.555748 -0.850226 -0.083053 0.014853 0.466988 5.200000
0.551165 -0.850290 -0.008044 0.014021 0.366985 5.200000
0.554147 -0.850250 0.066955 0.014381 0.266984 5.200000
0.564577 -0.850092 0.141953 0.015267 0.166990 5.200000
0.582346 -0.849814 0.193395 0.016084 0.095013 5.200000
0.599275 -0.849536 0.131583 0.016865 0.170086 5.200000
0.608676 -0.849376 0.056583 0.017675 0.270090 5.200000
0.610637 -0.849340 -0.018417 0.017908 0.370092 5.200000
0.604987 -0.849433 -0.093415 0.016873 0.470084 5.200000
0.591904 -0.849641 -0.168416 0.013859 0.575011 5.200000
0.571682 -0.849867 -0.210914 0.008482 0.593400 5.200000
0.553601 -0.849977 -0.142853 0.003637 0.593400 5.200000
