# Supplementary material for: Automatic Parking Controller with a Twin Artificial Neural Network Architecture
Source: Hindawi journal article supplement (doi:10.1155/2019/4801985), 2019-01-01
Supplement: f1 [file 4801985.f1.zip › data/data_197.txt]

7.100000 1.200000 0.000000 0.000000 0.000000 5.200000
7.096319 1.200000 -0.074999 0.000029 -0.011820 5.200000
7.084982 1.200000 -0.149997 0.000215 -0.033736 5.200000
7.066269 1.199986 -0.225001 0.000692 -0.057290 5.200000
7.039989 1.199964 -0.299996 0.001610 -0.080637 5.200000
7.006262 1.199887 -0.374998 0.003085 -0.103662 5.200000
6.964991 1.199708 -0.450003 0.005283 -0.126300 5.200000
6.916257 1.199381 -0.524995 0.008307 -0.148448 5.200000
6.860000 1.198803 -0.599999 0.012299 -0.169999 5.200000
6.796265 1.197867 -0.675002 0.017374 -0.190826 5.200000
6.725027 1.196403 -0.749996 0.023657 -0.210805 5.200000
6.646310 1.194250 -0.825000 0.031221 -0.229780 5.200000
6.560111 1.191175 -0.899998 0.040188 -0.247629 5.200000
6.466458 1.186935 -0.974998 0.050603 -0.264205 5.200000
6.365375 1.181216 -1.050002 0.062542 -0.279368 5.200000
6.256879 1.173689 -1.124995 0.076034 -0.293022 5.200000
6.141043 1.164001 -1.199999 0.091102 -0.305082 5.200000
6.017899 1.151719 -1.275003 0.107748 -0.315549 5.200000
5.887550 1.136436 -1.349995 0.125955 -0.324451 5.200000
5.750074 1.117651 -1.425000 0.145704 -0.331943 5.200000
5.605617 1.094895 -1.500001 0.166960 -0.338245 5.200000
5.454294 1.067615 -1.574997 0.189714 -0.343677 5.200000
5.296332 1.035317 -1.650001 0.213944 -0.348691 5.200000
5.131904 0.997366 -1.724997 0.239697 -0.353841 5.200000
4.961282 0.953205 -1.799998 0.267046 -0.359830 5.200000
4.784768 0.902158 -1.875002 0.296139 -0.367532 5.200000
4.602734 0.843528 -1.950113 0.327255 -0.378084 5.200000
4.416132 0.776727 -1.999673 0.360487 -0.386400 5.200000
4.230105 0.702995 -2.000000 0.394194 -0.385461 5.200000
4.046777 0.623094 -2.000000 0.427990 -0.388896 5.200000
3.866273 0.536988 -2.000000 0.462467 -0.399007 5.200000
3.688870 0.444649 -2.000000 0.497019 -0.389429 5.200000
3.514563 0.346610 -2.000000 0.526210 -0.304615 5.200000
3.342733 0.244264 -2.000000 0.547003 -0.206400 5.200000
3.172659 0.139038 -2.000000 0.559621 -0.106400 5.200000
3.003652 0.032523 -1.984948 0.563821 -0.006400 5.200000
2.838817 -0.071532 -1.910997 0.560695 0.093600 5.200000
2.679699 -0.170382 -1.835766 0.549971 0.193600 5.200000
2.525624 -0.263106 -1.760771 0.532216 0.293600 5.200000
2.376129 -0.348819 -1.685767 0.507765 0.393600 5.200000
2.230930 -0.426810 -1.610769 0.476673 0.493600 5.200000
2.089861 -0.496441 -1.535790 0.438940 0.593400 5.200000
1.952163 -0.557735 -1.469861 0.398587 0.593400 5.200000
1.819133 -0.610779 -1.394770 0.360254 0.593400 5.200000
1.691281 -0.656301 -1.319770 0.323928 0.593400 5.200000
1.569046 -0.695018 -1.244770 0.289609 0.593400 5.200000
1.452810 -0.727618 -1.169769 0.257296 0.593400 5.200000
1.342893 -0.754772 -1.094769 0.226990 0.593400 5.200000
1.239548 -0.777105 -1.019770 0.198689 0.593400 5.200000
1.143010 -0.795225 -0.944770 0.172394 0.593400 5.200000
1.053447 -0.809698 -0.869770 0.148118 0.593400 5.200000
0.971004 -0.821062 -0.794770 0.125836 0.593400 5.200000
0.895785 -0.829806 -0.719769 0.105574 0.593400 5.200000
0.827875 -0.836376 -0.644769 0.087306 0.593400 5.200000
0.767344 -0.841177 -0.569769 0.071056 0.593400 5.200000
0.714221 -0.844579 -0.494770 0.056810 0.593400 5.200000
0.668550 -0.846899 -0.419770 0.044571 0.593400 5.200000
0.630349 -0.848408 -0.344770 0.034339 0.593400 5.200000
0.599645 -0.849329 -0.269769 0.026115 0.593400 5.200000
0.576427 -0.849866 -0.194769 0.019890 0.591497 5.200000
0.560715 -0.850151 -0.119769 0.015911 0.515944 5.200000
0.552488 -0.850271 -0.044769 0.014244 0.415942 5.200000
0.551806 -0.850282 0.030231 0.014104 0.315950 5.200000
0.558530 -0.850183 0.105231 0.014806 0.215946 5.200000
0.572849 -0.849963 0.186068 0.015727 0.108164 5.200000
0.591919 -0.849658 0.171667 0.016447 0.114399 5.200000
0.605010 -0.849443 0.093306 0.017318 0.221125 5.200000
0.610482 -0.849340 0.018308 0.017888 0.321127 5.200000
0.608685 -0.849370 -0.056691 0.017576 0.421128 5.200000
0.599243 -0.849534 -0.131700 0.015637 0.521130 5.200000
0.582266 -0.849765 -0.212605 0.011314 0.592303 5.200000
0.561501 -0.849938 -0.181466 0.005757 0.593400 5.200000
0.547288 -0.849996 -0.104575 0.001949 0.593400 5.200000
