# Supplementary material for: Automatic Parking Controller with a Twin Artificial Neural Network Architecture
Source: Hindawi journal article supplement (doi:10.1155/2019/4801985), 2019-01-01
Supplement: f1 [file 4801985.f1.zip › data/data_198.txt]

7.200000 1.200000 0.000000 0.000000 0.000000 5.200000
7.196327 1.200000 -0.074998 0.000028 -0.010092 5.200000
7.184977 1.200000 -0.149997 0.000199 -0.029731 5.200000
7.166268 1.199987 -0.224998 0.000644 -0.051256 5.200000
7.139986 1.199966 -0.300004 0.001476 -0.072534 5.200000
7.106262 1.199894 -0.375002 0.002835 -0.093539 5.200000
7.064989 1.199732 -0.450000 0.004841 -0.114178 5.200000
7.016262 1.199438 -0.524999 0.007607 -0.134359 5.200000
6.960003 1.198907 -0.599996 0.011259 -0.153997 5.200000
6.896257 1.198049 -0.675005 0.015885 -0.172970 5.200000
6.825023 1.196712 -0.750004 0.021612 -0.191196 5.200000
6.746295 1.194740 -0.825002 0.028510 -0.208547 5.200000
6.660097 1.191945 -0.900000 0.036667 -0.224920 5.200000
6.566421 1.188063 -0.974999 0.046162 -0.240225 5.200000
6.465312 1.182846 -1.049997 0.057041 -0.254375 5.200000
6.356772 1.175990 -1.125003 0.069346 -0.267318 5.200000
6.240866 1.167147 -1.200004 0.083113 -0.279019 5.200000
6.117617 1.155937 -1.275002 0.098351 -0.289522 5.200000
5.987123 1.141969 -1.350001 0.115085 -0.298890 5.200000
5.849438 1.124789 -1.424999 0.133296 -0.307273 5.200000
5.704680 1.103935 -1.499997 0.153014 -0.314919 5.200000
5.552995 1.078898 -1.574999 0.174238 -0.322135 5.200000
5.394508 1.049144 -1.650004 0.197013 -0.329351 5.200000
5.229441 1.014120 -1.725003 0.221426 -0.337115 5.200000
5.058017 0.973174 -1.800001 0.247588 -0.346105 5.200000
4.880522 0.925671 -1.874999 0.275723 -0.357240 5.200000
4.697281 0.870823 -1.953107 0.306182 -0.372452 5.200000
4.509206 0.807987 -1.992638 0.339099 -0.385549 5.200000
4.321797 0.738301 -2.000000 0.372936 -0.389182 5.200000
4.136831 0.662250 -2.000000 0.407401 -0.398026 5.200000
3.954638 0.579784 -2.000000 0.443149 -0.415101 5.200000
3.775578 0.490718 -2.000000 0.480021 -0.416036 5.200000
3.599773 0.395379 -2.000000 0.512728 -0.345065 5.200000
3.426824 0.294947 -2.000000 0.537881 -0.255957 5.200000
3.255984 0.190962 -2.000000 0.554386 -0.155490 5.200000
3.086361 0.084776 -1.997146 0.562991 -0.055486 5.200000
2.918950 -0.021047 -1.947873 0.563365 0.044505 5.200000
2.757151 -0.122561 -1.872590 0.556132 0.144508 5.200000
2.600669 -0.218418 -1.797592 0.541765 0.244511 5.200000
2.448964 -0.307662 -1.722583 0.520611 0.344514 5.200000
2.301685 -0.389538 -1.647585 0.492747 0.444507 5.200000
2.158619 -0.463311 -1.572179 0.458262 0.548705 5.200000
2.019208 -0.528720 -1.506281 0.418144 0.593400 5.200000
1.883819 -0.585723 -1.431584 0.378823 0.593400 5.200000
1.753368 -0.634851 -1.356586 0.341511 0.593400 5.200000
1.628325 -0.676818 -1.281587 0.306205 0.593400 5.200000
1.509098 -0.712335 -1.206589 0.272907 0.593400 5.200000
1.396038 -0.742085 -1.131591 0.241615 0.593400 5.200000
1.289439 -0.766700 -1.056582 0.212329 0.593400 5.200000
1.189535 -0.786818 -0.981583 0.185050 0.593400 5.200000
1.096529 -0.803014 -0.906584 0.159786 0.593400 5.200000
1.010582 -0.815840 -0.831586 0.136523 0.593400 5.200000
0.931799 -0.825813 -0.756588 0.115270 0.593400 5.200000
0.860296 -0.833395 -0.681589 0.096024 0.593400 5.200000
0.796138 -0.839017 -0.606591 0.078781 0.593400 5.200000
0.739370 -0.843063 -0.531582 0.063550 0.593400 5.200000
0.690035 -0.845878 -0.456583 0.050326 0.593400 5.200000
0.648164 -0.847748 -0.381584 0.039110 0.593400 5.200000
0.613779 -0.848937 -0.306586 0.029901 0.593400 5.200000
0.586888 -0.849642 -0.231588 0.022700 0.593400 5.200000
0.567493 -0.850035 -0.156589 0.017540 0.569841 5.200000
0.555590 -0.850229 -0.081591 0.014822 0.465038 5.200000
0.551160 -0.850290 -0.006582 0.014020 0.365036 5.200000
0.554281 -0.850248 0.068417 0.014395 0.265034 5.200000
0.564858 -0.850088 0.143416 0.015285 0.165041 5.200000
0.582749 -0.849807 0.192995 0.016097 0.095100 5.200000
0.599533 -0.849532 0.130121 0.016883 0.172036 5.200000
0.608792 -0.849374 0.055121 0.017688 0.272039 5.200000
0.610619 -0.849340 -0.019879 0.017905 0.372042 5.200000
0.604808 -0.849436 -0.094878 0.016838 0.472034 5.200000
0.591574 -0.849646 -0.169878 0.013775 0.576593 5.200000
0.571250 -0.849870 -0.210167 0.008367 0.593400 5.200000
0.553321 -0.849978 -0.141391 0.003562 0.593400 5.200000
