# Supplementary material for: Automatic Parking Controller with a Twin Artificial Neural Network Architecture
Source: Hindawi journal article supplement (doi:10.1155/2019/4801985), 2019-01-01
Supplement: f1 [file 4801985.f1.zip › data/data_199.txt]

6.300000 1.300000 0.000000 0.000000 0.000000 5.200000
6.296268 1.300000 -0.074999 0.000052 -0.042054 5.200000
6.285023 1.299999 -0.149998 0.000415 -0.090324 5.200000
6.266239 1.299982 -0.224998 0.001369 -0.139049 5.200000
6.240007 1.299925 -0.299997 0.003221 -0.188647 5.200000
6.206257 1.299765 -0.374996 0.006290 -0.239539 5.200000
6.164998 1.299413 -0.449995 0.010947 -0.292361 5.200000
6.116260 1.298721 -0.524996 0.017577 -0.348254 5.200000
6.060016 1.297480 -0.600004 0.026701 -0.409465 5.200000
5.996307 1.295402 -0.675003 0.038976 -0.486599 5.200000
5.925135 1.292054 -0.750002 0.055510 -0.543867 5.200000
5.846551 1.286904 -0.825001 0.075671 -0.569914 5.200000
5.760634 1.279409 -0.900000 0.098500 -0.575731 5.200000
5.667464 1.269019 -0.975000 0.123389 -0.575813 5.200000
5.567159 1.255218 -1.049999 0.150269 -0.575720 5.200000
5.459887 1.237395 -1.124998 0.179140 -0.575397 5.200000
5.345830 1.214912 -1.199997 0.210007 -0.575320 5.200000
5.225254 1.187139 -1.274996 0.242859 -0.575985 5.200000
5.098421 1.153356 -1.349996 0.277720 -0.576946 5.200000
4.965725 1.112877 -1.424995 0.314546 -0.576239 5.200000
4.827565 1.064950 -1.499994 0.353352 -0.573143 5.200000
4.684429 1.008811 -1.575001 0.393579 -0.553139 5.200000
4.536723 0.944175 -1.650002 0.430324 -0.475435 5.200000
4.384550 0.871246 -1.725002 0.462296 -0.402109 5.200000
4.227954 0.790375 -1.800001 0.490234 -0.341508 5.200000
4.066949 0.701840 -1.875000 0.514515 -0.284486 5.200000
3.901478 0.605928 -1.950407 0.535159 -0.228812 5.200000
3.731871 0.503362 -2.000000 0.551821 -0.171164 5.200000
3.562170 0.397374 -2.000000 0.563792 -0.111361 5.200000
3.393562 0.289808 -2.000000 0.571148 -0.055176 5.200000
3.225508 0.181378 -2.000000 0.573982 -0.004698 5.200000
3.057461 0.072800 -1.995219 0.572228 0.042603 5.200000
2.891466 -0.033475 -1.935511 0.566103 0.091151 5.200000
2.730873 -0.134516 -1.859847 0.556337 0.161056 5.200000
2.575445 -0.229655 -1.784847 0.540827 0.261364 5.200000
2.424715 -0.318022 -1.709848 0.518536 0.361362 5.200000
2.278329 -0.398897 -1.634849 0.489567 0.461361 5.200000
2.136140 -0.471559 -1.559131 0.453916 0.568894 5.200000
1.997424 -0.535846 -1.494731 0.413540 0.593400 5.200000
1.862944 -0.591767 -1.419021 0.374557 0.593400 5.200000
1.733455 -0.639928 -1.344019 0.337585 0.593400 5.200000
1.609449 -0.681036 -1.269018 0.302615 0.593400 5.200000
1.491311 -0.715793 -1.194022 0.269651 0.593400 5.200000
1.379387 -0.744868 -1.119018 0.238696 0.593400 5.200000
1.273945 -0.768913 -1.044025 0.209751 0.593400 5.200000
1.175225 -0.788547 -0.969023 0.182808 0.593400 5.200000
1.083418 -0.804336 -0.894019 0.157876 0.593400 5.200000
0.998686 -0.816834 -0.819020 0.134950 0.593400 5.200000
0.921147 -0.826532 -0.744023 0.114033 0.593400 5.200000
0.850877 -0.833910 -0.669019 0.095126 0.593400 5.200000
0.787963 -0.839381 -0.594016 0.078222 0.593400 5.200000
0.732451 -0.843315 -0.519024 0.063318 0.593400 5.200000
0.684375 -0.846051 -0.444020 0.050438 0.593400 5.200000
0.643769 -0.847882 -0.369022 0.039555 0.593400 5.200000
0.610636 -0.849038 -0.294021 0.030684 0.593400 5.200000
0.585005 -0.849740 -0.219020 0.023815 0.593210 5.200000
0.566836 -0.850128 -0.144018 0.019124 0.529701 5.200000
0.556152 -0.850325 -0.069016 0.016886 0.429500 5.200000
0.553278 -0.850370 0.005979 0.016406 0.329503 5.200000
0.557356 -0.850306 0.080983 0.016839 0.229502 5.200000
0.569221 -0.850093 0.156252 0.017671 0.129294 5.200000
0.588446 -0.849750 0.214750 0.018259 0.042680 5.200000
0.606193 -0.849425 0.139838 0.018890 0.142564 5.200000
0.616452 -0.849223 0.064838 0.019664 0.242562 5.200000
0.618997 -0.849172 -0.010163 0.019937 0.342559 5.200000
0.614408 -0.849262 -0.085161 0.019154 0.442558 5.200000
0.602118 -0.849481 -0.160165 0.016503 0.542864 5.200000
0.582266 -0.849765 -0.238690 0.011316 0.593400 5.200000
0.560933 -0.849945 -0.177535 0.005602 0.593400 5.200000
0.546958 -0.849997 -0.102256 0.001864 0.593400 5.200000
