# Supplementary material for: Automatic Parking Controller with a Twin Artificial Neural Network Architecture
Source: Hindawi journal article supplement (doi:10.1155/2019/4801985), 2019-01-01
Supplement: f1 [file 4801985.f1.zip › data/data_200.txt]

6.400000 1.300000 0.000000 0.000000 0.000000 5.200000
6.396269 1.300000 -0.075000 0.000050 -0.036875 5.200000
6.385029 1.299999 -0.150000 0.000376 -0.080854 5.200000
6.366237 1.299983 -0.225000 0.001259 -0.124979 5.200000
6.340007 1.299930 -0.300000 0.002938 -0.169498 5.200000
6.306241 1.299788 -0.375000 0.005720 -0.214588 5.200000
6.264999 1.299467 -0.450000 0.009903 -0.260443 5.200000
6.216257 1.298841 -0.525000 0.015805 -0.307392 5.200000
6.160015 1.297737 -0.600000 0.023791 -0.355948 5.200000
6.096295 1.295893 -0.675000 0.034261 -0.407124 5.200000
6.025101 1.292984 -0.750000 0.047749 -0.462858 5.200000
5.946483 1.288568 -0.825000 0.064994 -0.520347 5.200000
5.860472 1.282072 -0.900000 0.085975 -0.545257 5.200000
5.767172 1.272907 -0.975000 0.110074 -0.572280 5.200000
5.666705 1.260446 -1.050000 0.136914 -0.575414 5.200000
5.559196 1.244044 -1.125000 0.165786 -0.575351 5.200000
5.444853 1.223102 -1.200000 0.196649 -0.575494 5.200000
5.323908 1.196931 -1.275000 0.229505 -0.575790 5.200000
5.196640 1.164859 -1.350000 0.264340 -0.575664 5.200000
5.063408 1.126153 -1.425000 0.301174 -0.574848 5.200000
4.924611 1.080071 -1.500000 0.339559 -0.559746 5.200000
4.780625 1.026195 -1.575000 0.375696 -0.493169 5.200000
4.631641 0.964509 -1.650000 0.408478 -0.436903 5.200000
4.477833 0.895117 -1.725000 0.438464 -0.386637 5.200000
4.319323 0.818062 -1.800000 0.465787 -0.339041 5.200000
4.156207 0.733459 -1.875000 0.490405 -0.292709 5.200000
3.988517 0.641501 -1.952071 0.512196 -0.246869 5.200000
3.816573 0.542609 -1.989658 0.530855 -0.198319 5.200000
3.644934 0.440075 -2.000000 0.545456 -0.147206 5.200000
3.474548 0.335345 -2.000000 0.556091 -0.099857 5.200000
3.305083 0.229125 -2.000000 0.563058 -0.055005 5.200000
3.136157 0.122017 -1.999906 0.566464 -0.013628 5.200000
2.967950 0.014969 -1.969287 0.566193 0.020506 5.200000
2.804658 -0.088373 -1.894620 0.561189 0.114999 5.200000
2.646889 -0.186329 -1.819620 0.548877 0.215000 5.200000
2.494029 -0.277952 -1.744620 0.529702 0.315001 5.200000
2.345665 -0.362376 -1.669620 0.503825 0.414999 5.200000
2.201529 -0.438949 -1.594620 0.471318 0.515002 5.200000
2.061345 -0.507081 -1.523027 0.432411 0.593400 5.200000
1.924701 -0.566850 -1.453788 0.392379 0.593400 5.200000
1.792832 -0.618519 -1.378795 0.354475 0.593400 5.200000
1.666238 -0.662812 -1.303792 0.318573 0.593400 5.200000
1.545324 -0.700429 -1.228788 0.284685 0.593400 5.200000
1.430484 -0.732050 -1.153791 0.252797 0.593400 5.200000
1.322004 -0.758357 -1.078793 0.222921 0.593400 5.200000
1.220139 -0.779958 -1.003789 0.195044 0.593400 5.200000
1.125109 -0.797455 -0.928786 0.169180 0.593400 5.200000
1.037080 -0.811416 -0.853793 0.145329 0.593400 5.200000
0.956193 -0.822354 -0.778789 0.123479 0.593400 5.200000
0.882544 -0.830751 -0.703793 0.103642 0.593400 5.200000
0.816217 -0.837058 -0.628792 0.085804 0.593400 5.200000
0.757266 -0.841655 -0.553790 0.069978 0.593400 5.200000
0.705733 -0.844911 -0.478788 0.056162 0.593400 5.200000
0.661663 -0.847130 -0.403794 0.044353 0.593400 5.200000
0.625065 -0.848572 -0.328790 0.034543 0.593400 5.200000
0.595954 -0.849462 -0.253787 0.026754 0.593400 5.200000
0.574334 -0.849976 -0.178794 0.020968 0.578070 5.200000
0.560181 -0.850249 -0.103791 0.017667 0.475858 5.200000
0.553465 -0.850366 -0.028787 0.016439 0.375861 5.200000
0.554374 -0.850356 0.046211 0.016531 0.275865 5.200000
0.562789 -0.850211 0.121208 0.017278 0.175856 5.200000
0.578683 -0.849930 0.194863 0.018047 0.076440 5.200000
0.598893 -0.849555 0.174637 0.018550 0.096154 5.200000
0.612624 -0.849302 0.099612 0.019321 0.196204 5.200000
0.618822 -0.849176 0.024609 0.019921 0.296201 5.200000
0.617585 -0.849198 -0.050395 0.019715 0.396197 5.200000
0.608751 -0.849368 -0.125390 0.018006 0.496205 5.200000
0.592445 -0.849628 -0.200493 0.014046 0.593400 5.200000
0.569976 -0.849878 -0.211804 0.008024 0.593400 5.200000
0.552503 -0.849984 -0.137025 0.003345 0.593400 5.200000
