# Supplementary material for: Automatic Parking Controller with a Twin Artificial Neural Network Architecture
Source: Hindawi journal article supplement (doi:10.1155/2019/4801985), 2019-01-01
Supplement: f1 [file 4801985.f1.zip › data/data_201.txt]

6.500000 1.300000 0.000000 0.000000 0.000000 5.200000
6.496279 1.300000 -0.074998 0.000048 -0.033175 5.200000
6.485022 1.300000 -0.149998 0.000362 -0.074173 5.200000
6.466238 1.299984 -0.225003 0.001173 -0.115129 5.200000
6.440010 1.299937 -0.299996 0.002748 -0.156267 5.200000
6.406240 1.299801 -0.375001 0.005335 -0.197619 5.200000
6.365007 1.299502 -0.450001 0.009200 -0.239245 5.200000
6.316253 1.298930 -0.524999 0.014627 -0.281213 5.200000
6.260017 1.297903 -0.600004 0.021918 -0.323614 5.200000
6.196296 1.296217 -0.674997 0.031382 -0.366600 5.200000
6.125082 1.293560 -0.750002 0.043389 -0.410421 5.200000
6.046447 1.289570 -0.824995 0.058303 -0.456107 5.200000
5.960379 1.283767 -0.899999 0.076620 -0.493606 5.200000
5.866997 1.275606 -0.975000 0.098058 -0.518438 5.200000
5.766355 1.264469 -1.049998 0.122559 -0.543157 5.200000
5.658628 1.249693 -1.125002 0.150390 -0.569946 5.200000
5.543970 1.230517 -1.199995 0.181195 -0.575137 5.200000
5.422631 1.206224 -1.275000 0.214034 -0.575139 5.200000
5.294893 1.176119 -1.350002 0.248893 -0.575466 5.200000
5.161073 1.139480 -1.424998 0.285177 -0.557305 5.200000
5.021499 1.095855 -1.499999 0.320218 -0.509696 5.200000
4.876401 1.044994 -1.574996 0.353383 -0.466002 5.200000
4.726040 0.986781 -1.650001 0.384740 -0.424782 5.200000
4.570601 0.921102 -1.724994 0.414264 -0.384867 5.200000
4.410276 0.847892 -1.799999 0.441866 -0.345724 5.200000
4.245222 0.767170 -1.875001 0.467411 -0.307018 5.200000
4.075526 0.678948 -1.950607 0.490759 -0.268614 5.200000
3.901721 0.583670 -2.000000 0.511585 -0.227549 5.200000
3.728156 0.484146 -2.000000 0.528918 -0.182418 5.200000
3.556212 0.381993 -2.000000 0.542729 -0.141591 5.200000
3.385538 0.277741 -2.000000 0.553374 -0.103733 5.200000
3.215819 0.171932 -2.000000 0.561095 -0.068273 5.200000
3.046801 0.065088 -1.997940 0.565610 -0.026334 5.200000
2.880656 -0.040429 -1.930225 0.564371 0.067771 5.200000
2.720381 -0.141033 -1.854860 0.555557 0.168006 5.200000
2.565280 -0.235748 -1.779865 0.539545 0.268013 5.200000
2.414842 -0.323643 -1.704862 0.516814 0.368007 5.200000
2.268752 -0.403980 -1.629858 0.487420 0.468013 5.200000
2.126835 -0.476084 -1.553984 0.451291 0.577203 5.200000
1.988336 -0.539821 -1.489796 0.410885 0.593400 5.200000
1.854173 -0.595201 -1.414035 0.372036 0.593400 5.200000
1.725036 -0.642871 -1.339031 0.335198 0.593400 5.200000
1.601405 -0.683536 -1.264030 0.300362 0.593400 5.200000
1.483670 -0.717896 -1.189036 0.267530 0.593400 5.200000
1.372169 -0.746619 -1.114031 0.236709 0.593400 5.200000
1.267168 -0.770349 -1.039036 0.207896 0.593400 5.200000
1.168907 -0.789707 -0.964035 0.181088 0.593400 5.200000
1.077563 -0.805264 -0.889032 0.156290 0.593400 5.200000
0.993304 -0.817562 -0.814031 0.133496 0.593400 5.200000
0.916246 -0.827091 -0.739036 0.112713 0.593400 5.200000
0.846464 -0.834329 -0.664032 0.093938 0.593400 5.200000
0.784045 -0.839685 -0.589029 0.077169 0.593400 5.200000
0.729026 -0.843531 -0.514036 0.062399 0.593400 5.200000
0.681442 -0.846198 -0.439033 0.049652 0.593400 5.200000
0.641331 -0.847979 -0.364034 0.038900 0.593400 5.200000
0.608694 -0.849097 -0.289033 0.030165 0.593400 5.200000
0.583566 -0.849773 -0.214034 0.023426 0.592534 5.200000
0.565912 -0.850146 -0.139030 0.018912 0.522847 5.200000
0.555718 -0.850333 -0.064028 0.016808 0.422850 5.200000
0.553309 -0.850370 0.010965 0.016409 0.322853 5.200000
0.557925 -0.850297 0.085970 0.016891 0.222851 5.200000
0.570277 -0.850075 0.161615 0.017724 0.122366 5.200000
0.589787 -0.849725 0.213658 0.018293 0.044136 5.200000
0.607097 -0.849409 0.134851 0.018942 0.149215 5.200000
0.616873 -0.849214 0.059850 0.019707 0.249212 5.200000
0.618907 -0.849174 -0.015151 0.019923 0.349209 5.200000
0.613819 -0.849273 -0.090148 0.019041 0.449210 5.200000
0.601043 -0.849498 -0.165152 0.016243 0.550939 5.200000
0.580775 -0.849782 -0.239579 0.010916 0.593400 5.200000
0.559772 -0.849952 -0.172383 0.005291 0.593400 5.200000
0.546282 -0.849998 -0.097269 0.001684 0.593400 5.200000
