# Supplementary material for: Automatic Parking Controller with a Twin Artificial Neural Network Architecture
Source: Hindawi journal article supplement (doi:10.1155/2019/4801985), 2019-01-01
Supplement: f1 [file 4801985.f1.zip › data/data_202.txt]

6.600000 1.300000 0.000000 0.000000 0.000000 5.200000
6.596285 1.300000 -0.075001 0.000047 -0.030516 5.200000
6.585020 1.300000 -0.150002 0.000339 -0.069427 5.200000
6.566239 1.299984 -0.225003 0.001123 -0.108189 5.200000
6.540016 1.299940 -0.300003 0.002606 -0.147025 5.200000
6.506240 1.299810 -0.374996 0.005064 -0.185919 5.200000
6.465005 1.299529 -0.449997 0.008710 -0.224856 5.200000
6.416251 1.298984 -0.524998 0.013830 -0.263823 5.200000
6.360018 1.298014 -0.599999 0.020672 -0.302783 5.200000
6.296278 1.296422 -0.675000 0.029518 -0.341677 5.200000
6.225077 1.293933 -0.750002 0.040659 -0.380380 5.200000
6.146421 1.290199 -0.825003 0.054380 -0.419019 5.200000
6.060334 1.284816 -0.900005 0.070907 -0.447136 5.200000
5.966890 1.277286 -0.974995 0.090106 -0.471696 5.200000
5.866154 1.267073 -1.049996 0.112112 -0.496416 5.200000
5.758260 1.253584 -1.124997 0.137155 -0.521138 5.200000
5.643327 1.236067 -1.199999 0.165472 -0.545872 5.200000
5.521616 1.213777 -1.275000 0.197172 -0.564135 5.200000
5.393360 1.185897 -1.350001 0.230586 -0.548168 5.200000
5.258850 1.151912 -1.425002 0.264097 -0.521168 5.200000
5.118333 1.111382 -1.500003 0.297111 -0.490004 5.200000
4.972080 1.063984 -1.574999 0.329259 -0.457246 5.200000
4.820338 1.009445 -1.649996 0.360309 -0.423877 5.200000
4.663350 0.947569 -1.724997 0.390085 -0.390376 5.200000
4.501331 0.878210 -1.799998 0.418415 -0.356951 5.200000
4.334464 0.801263 -1.874999 0.445170 -0.323697 5.200000
4.162910 0.716716 -1.952150 0.470190 -0.290793 5.200000
3.987165 0.624774 -1.989719 0.493208 -0.254660 5.200000
3.812026 0.528323 -2.000000 0.513048 -0.214357 5.200000
3.638630 0.428655 -2.000000 0.529740 -0.178230 5.200000
3.466773 0.326358 -2.000000 0.543615 -0.145436 5.200000
3.296216 0.221906 -2.000000 0.554944 -0.115101 5.200000
3.126694 0.115707 -2.000000 0.563769 -0.074693 5.200000
2.958533 0.008995 -1.966582 0.566086 0.020661 5.200000
2.795595 -0.094078 -1.890370 0.560636 0.120658 5.200000
2.638105 -0.191686 -1.815380 0.548008 0.220663 5.200000
2.485512 -0.282930 -1.740378 0.528399 0.320662 5.200000
2.337402 -0.366928 -1.665377 0.502165 0.420658 5.200000
2.193499 -0.443033 -1.590376 0.469282 0.520656 5.200000
2.053489 -0.510696 -1.519921 0.430085 0.593400 5.200000
1.917106 -0.569984 -1.449543 0.390180 0.593400 5.200000
1.785522 -0.621214 -1.374550 0.352390 0.593400 5.200000
1.659241 -0.665112 -1.299548 0.316601 0.593400 5.200000
1.538658 -0.702374 -1.224544 0.282826 0.593400 5.200000
1.424171 -0.733676 -1.149545 0.251052 0.593400 5.200000
1.316059 -0.759699 -1.074548 0.221290 0.593400 5.200000
1.214577 -0.781052 -0.999544 0.193527 0.593400 5.200000
1.119940 -0.798333 -0.924541 0.167777 0.593400 5.200000
1.032310 -0.812111 -0.849549 0.144039 0.593400 5.200000
0.951829 -0.822893 -0.774545 0.122303 0.593400 5.200000
0.878591 -0.831161 -0.699547 0.102579 0.593400 5.200000
0.812683 -0.837360 -0.624546 0.084855 0.593400 5.200000
0.754155 -0.841872 -0.549545 0.069142 0.593400 5.200000
0.703040 -0.845061 -0.474543 0.055441 0.593400 5.200000
0.659389 -0.847231 -0.399550 0.043744 0.593400 5.200000
0.623212 -0.848634 -0.324546 0.034047 0.593400 5.200000
0.594528 -0.849500 -0.249542 0.026371 0.593400 5.200000
0.573338 -0.849997 -0.174548 0.020715 0.574272 5.200000
0.559624 -0.850260 -0.099546 0.017555 0.470198 5.200000
0.553322 -0.850368 -0.024543 0.016417 0.370201 5.200000
0.554684 -0.850350 0.050457 0.016566 0.270205 5.200000
0.563494 -0.850198 0.125453 0.017328 0.170197 5.200000
0.579834 -0.849909 0.198348 0.018075 0.070753 5.200000
0.599858 -0.849537 0.170360 0.018586 0.101857 5.200000
0.613169 -0.849291 0.095368 0.019365 0.201864 5.200000
0.618966 -0.849174 0.020364 0.019937 0.301860 5.200000
0.617263 -0.849204 -0.054640 0.019661 0.401857 5.200000
0.608026 -0.849381 -0.129635 0.017849 0.501865 5.200000
0.591290 -0.849645 -0.205461 0.013742 0.593400 5.200000
0.568776 -0.849887 -0.207665 0.007703 0.593400 5.200000
0.551738 -0.849986 -0.132780 0.003141 0.593400 5.200000
