# Supplementary material for: Automatic Parking Controller with a Twin Artificial Neural Network Architecture
Source: Hindawi journal article supplement (doi:10.1155/2019/4801985), 2019-01-01
Supplement: f1 [file 4801985.f1.zip › data/data_203.txt]

6.700000 1.300000 0.000000 0.000000 0.000000 5.200000
6.696293 1.300000 -0.074998 0.000045 -0.028001 5.200000
6.685012 1.300000 -0.149995 0.000327 -0.064954 5.200000
6.666248 1.299985 -0.224997 0.001066 -0.101690 5.200000
6.640006 1.299944 -0.300001 0.002481 -0.138411 5.200000
6.606246 1.299814 -0.375000 0.004811 -0.175071 5.200000
6.565008 1.299548 -0.449997 0.008268 -0.211628 5.200000
6.516250 1.299033 -0.524997 0.013103 -0.248019 5.200000
6.460019 1.298120 -0.600001 0.019542 -0.284138 5.200000
6.396273 1.296614 -0.675001 0.027846 -0.319840 5.200000
6.325074 1.294272 -0.749998 0.038239 -0.355048 5.200000
6.246388 1.290769 -0.824997 0.050972 -0.384104 5.200000
6.160297 1.285737 -0.900001 0.065998 -0.408814 5.200000
6.066798 1.278746 -0.975002 0.083442 -0.433530 5.200000
5.966001 1.269314 -1.050000 0.103504 -0.458251 5.200000
5.857964 1.256850 -1.124998 0.126402 -0.482974 5.200000
5.742844 1.240720 -1.200001 0.152357 -0.507831 5.200000
5.620811 1.220194 -1.275003 0.181014 -0.515459 5.200000
5.492078 1.194614 -1.350001 0.211314 -0.509472 5.200000
5.356904 1.163391 -1.424999 0.242515 -0.494614 5.200000
5.215508 1.126017 -1.500001 0.273999 -0.473731 5.200000
5.068178 1.082084 -1.575004 0.305286 -0.449215 5.200000
4.915159 1.031232 -1.650003 0.336039 -0.422645 5.200000
4.756717 0.973178 -1.725000 0.366006 -0.395052 5.200000
4.593091 0.907686 -1.800000 0.395000 -0.367033 5.200000
4.424516 0.834600 -1.875004 0.422863 -0.338996 5.200000
4.251180 0.753752 -1.950667 0.449455 -0.311364 5.200000
4.073775 0.665374 -2.000000 0.474486 -0.280694 5.200000
3.896863 0.571936 -2.000000 0.496750 -0.244079 5.200000
3.721983 0.474887 -2.000000 0.516132 -0.212222 5.200000
3.548909 0.374677 -2.000000 0.533046 -0.184001 5.200000
3.377427 0.271754 -2.000000 0.547824 -0.159667 5.200000
3.207360 0.166504 -2.000000 0.559802 -0.112432 5.200000
3.038266 0.059662 -1.992220 0.565762 -0.027964 5.200000
2.872507 -0.045577 -1.926113 0.564166 0.073009 5.200000
2.712510 -0.145926 -1.851111 0.554895 0.173009 5.200000
2.557650 -0.240306 -1.776108 0.538591 0.273009 5.200000
2.407441 -0.327854 -1.701109 0.515490 0.373009 5.200000
2.261551 -0.407787 -1.626112 0.485786 0.473010 5.200000
2.119848 -0.479462 -1.550185 0.449304 0.582660 5.200000
1.981516 -0.542785 -1.485990 0.408895 0.593400 5.200000
1.847592 -0.597761 -1.410285 0.370146 0.593400 5.200000
1.718722 -0.645063 -1.335281 0.333409 0.593400 5.200000
1.595375 -0.685398 -1.260279 0.298673 0.593400 5.200000
1.477944 -0.719460 -1.185286 0.265941 0.593400 5.200000
1.366761 -0.747921 -1.110281 0.235220 0.593400 5.200000
1.262092 -0.771417 -1.035286 0.206507 0.593400 5.200000
1.164175 -0.790570 -0.960284 0.179801 0.593400 5.200000
1.073183 -0.805951 -0.885282 0.155104 0.593400 5.200000
0.989279 -0.818100 -0.810281 0.132409 0.593400 5.200000
0.912582 -0.827505 -0.735287 0.111726 0.593400 5.200000
0.843167 -0.834639 -0.660283 0.093051 0.593400 5.200000
0.781118 -0.839909 -0.585279 0.076383 0.593400 5.200000
0.726474 -0.843689 -0.510286 0.061715 0.593400 5.200000
0.679260 -0.846306 -0.435283 0.049067 0.593400 5.200000
0.639519 -0.848049 -0.360283 0.038414 0.593400 5.200000
0.607255 -0.849141 -0.285282 0.029780 0.593400 5.200000
0.582503 -0.849798 -0.210284 0.023137 0.591734 5.200000
0.565233 -0.850158 -0.135280 0.018759 0.517846 5.200000
0.555427 -0.850337 -0.060278 0.016757 0.417850 5.200000
0.553336 -0.850370 0.014715 0.016412 0.317853 5.200000
0.558377 -0.850289 0.089720 0.016931 0.217850 5.200000
0.571096 -0.850061 0.165671 0.017764 0.117139 5.200000
0.590800 -0.849707 0.211508 0.018318 0.047001 5.200000
0.607748 -0.849397 0.131101 0.018981 0.154215 5.200000
0.617156 -0.849208 0.056099 0.019736 0.254212 5.200000
0.618829 -0.849175 -0.018902 0.019912 0.354209 5.200000
0.613349 -0.849282 -0.093898 0.018949 0.454211 5.200000
0.600207 -0.849511 -0.168902 0.016037 0.557472 5.200000
0.579643 -0.849793 -0.238945 0.010613 0.593400 5.200000
0.558926 -0.849956 -0.168549 0.005064 0.593400 5.200000
0.545800 -0.849999 -0.093519 0.001555 0.593400 5.200000
