# Supplementary material for: Automatic Parking Controller with a Twin Artificial Neural Network Architecture
Source: Hindawi journal article supplement (doi:10.1155/2019/4801985), 2019-01-01
Supplement: f1 [file 4801985.f1.zip › data/data_204.txt]

6.800000 1.300000 0.000000 0.000000 0.000000 5.200000
6.796298 1.300000 -0.074996 0.000043 -0.025406 5.200000
6.785008 1.300000 -0.150004 0.000307 -0.060352 5.200000
6.766252 1.299985 -0.225000 0.001014 -0.094996 5.200000
6.740005 1.299948 -0.299997 0.002354 -0.129558 5.200000
6.706247 1.299825 -0.375000 0.004554 -0.163972 5.200000
6.665006 1.299574 -0.450001 0.007812 -0.198155 5.200000
6.616249 1.299083 -0.524997 0.012360 -0.232015 5.200000
6.560012 1.298232 -0.600005 0.018402 -0.265407 5.200000
6.496272 1.296812 -0.675001 0.026164 -0.298458 5.200000
6.425064 1.294611 -0.749998 0.035839 -0.327018 5.200000
6.346374 1.291335 -0.825001 0.047489 -0.351708 5.200000
6.260260 1.286665 -0.900001 0.061215 -0.376431 5.200000
6.166727 1.280187 -0.974998 0.077219 -0.401145 5.200000
6.065865 1.271462 -1.049996 0.095686 -0.425864 5.200000
5.957718 1.259933 -1.125002 0.116851 -0.450963 5.200000
5.842443 1.245024 -1.199998 0.140672 -0.468209 5.200000
5.720145 1.226087 -1.275003 0.166694 -0.474762 5.200000
5.591038 1.202521 -1.350002 0.194428 -0.473945 5.200000
5.455301 1.173734 -1.424999 0.223401 -0.466120 5.200000
5.313200 1.139215 -1.499998 0.253109 -0.452886 5.200000
5.164953 1.098461 -1.575003 0.283152 -0.435528 5.200000
5.010828 1.051082 -1.649999 0.313156 -0.415519 5.200000
4.851085 0.996687 -1.724995 0.342855 -0.393877 5.200000
4.685992 0.935005 -1.800004 0.372035 -0.371432 5.200000
4.515797 0.865744 -1.875000 0.400543 -0.348748 5.200000
4.340740 0.788710 -1.952616 0.428265 -0.326514 5.200000
4.161439 0.703902 -1.988974 0.454923 -0.300433 5.200000
3.982938 0.613844 -2.000000 0.479132 -0.268513 5.200000
3.806489 0.519680 -2.000000 0.500808 -0.240897 5.200000
3.632012 0.421925 -2.000000 0.520349 -0.217070 5.200000
3.459391 0.320928 -2.000000 0.538038 -0.196170 5.200000
3.288492 0.217036 -2.000000 0.553943 -0.169775 5.200000
3.119003 0.110852 -2.000000 0.564039 -0.074852 5.200000
2.950986 0.004198 -1.965299 0.565854 0.025233 5.200000
2.788283 -0.098661 -1.886943 0.560190 0.125233 5.200000
2.631031 -0.196010 -1.811946 0.547252 0.225228 5.200000
2.478649 -0.286930 -1.736949 0.527351 0.325235 5.200000
2.330734 -0.370586 -1.661948 0.500804 0.425230 5.200000
2.187020 -0.446300 -1.586945 0.467621 0.525226 5.200000
2.047154 -0.513595 -1.517417 0.428204 0.593400 5.200000
1.910983 -0.572496 -1.446116 0.388409 0.593400 5.200000
1.779632 -0.623374 -1.371122 0.350712 0.593400 5.200000
1.653605 -0.666952 -1.296120 0.315014 0.593400 5.200000
1.533291 -0.703930 -1.221117 0.281330 0.593400 5.200000
1.419088 -0.734976 -1.146117 0.249648 0.593400 5.200000
1.311274 -0.760772 -1.071121 0.219977 0.593400 5.200000
1.210102 -0.781926 -0.996117 0.192307 0.593400 5.200000
1.115783 -0.799034 -0.921114 0.166649 0.593400 5.200000
1.028476 -0.812665 -0.846121 0.143002 0.593400 5.200000
0.948323 -0.823322 -0.771118 0.121357 0.593400 5.200000
0.875416 -0.831486 -0.696119 0.101725 0.593400 5.200000
0.809845 -0.837601 -0.621118 0.084094 0.593400 5.200000
0.751658 -0.842044 -0.546118 0.068472 0.593400 5.200000
0.700886 -0.845179 -0.471115 0.054864 0.593400 5.200000
0.657573 -0.847310 -0.396122 0.043257 0.593400 5.200000
0.621734 -0.848684 -0.321119 0.033652 0.593400 5.200000
0.593393 -0.849530 -0.246115 0.026067 0.593400 5.200000
0.572547 -0.850013 -0.171120 0.020516 0.570438 5.200000
0.559191 -0.850268 -0.096119 0.017469 0.465628 5.200000
0.553246 -0.850370 -0.021116 0.016406 0.365631 5.200000
0.554949 -0.850346 0.053885 0.016596 0.265635 5.200000
0.564084 -0.850187 0.128880 0.017368 0.165627 5.200000
0.580788 -0.849892 0.201138 0.018096 0.066115 5.200000
0.600625 -0.849524 0.166933 0.018617 0.106428 5.200000
0.613582 -0.849283 0.091940 0.019399 0.206433 5.200000
0.619057 -0.849172 0.016937 0.019948 0.306430 5.200000
0.616983 -0.849210 -0.058067 0.019614 0.406427 5.200000
0.607421 -0.849391 -0.133064 0.017716 0.506435 5.200000
0.590329 -0.849658 -0.209828 0.013488 0.593400 5.200000
0.567842 -0.849894 -0.204569 0.007452 0.593400 5.200000
0.551142 -0.849988 -0.129352 0.002981 0.593400 5.200000
