# Supplementary material for: Automatic Parking Controller with a Twin Artificial Neural Network Architecture
Source: Hindawi journal article supplement (doi:10.1155/2019/4801985), 2019-01-01
Supplement: f1 [file 4801985.f1.zip › data/data_205.txt]

6.900000 1.300000 0.000000 0.000000 0.000000 5.200000
6.896305 1.300000 -0.075001 0.000037 -0.022663 5.200000
6.884999 1.300000 -0.150002 0.000297 -0.055536 5.200000
6.866257 1.299986 -0.224997 0.000960 -0.088018 5.200000
6.839994 1.299941 -0.300003 0.002224 -0.120357 5.200000
6.806256 1.299836 -0.374999 0.004287 -0.152476 5.200000
6.764994 1.299598 -0.450005 0.007342 -0.184262 5.200000
6.716256 1.299142 -0.525001 0.011591 -0.215606 5.200000
6.660007 1.298334 -0.599997 0.017233 -0.246497 5.200000
6.596274 1.297011 -0.675004 0.024438 -0.273619 5.200000
6.525053 1.294961 -0.749999 0.033295 -0.298208 5.200000
6.446364 1.291932 -0.824999 0.043940 -0.322922 5.200000
6.360218 1.287608 -0.900001 0.056554 -0.347637 5.200000
6.266662 1.281626 -0.975001 0.071307 -0.372362 5.200000
6.165726 1.273559 -1.050003 0.088407 -0.397149 5.200000
6.057512 1.262916 -1.124998 0.107934 -0.417544 5.200000
5.942072 1.249141 -1.200004 0.129680 -0.430167 5.200000
5.819573 1.231701 -1.275000 0.153395 -0.437865 5.200000
5.690122 1.209992 -1.350005 0.178846 -0.440089 5.200000
5.553940 1.183489 -1.425002 0.205691 -0.437273 5.200000
5.411203 1.151611 -1.499997 0.233575 -0.429694 5.200000
5.262162 1.113894 -1.575004 0.262158 -0.418499 5.200000
5.107050 1.069828 -1.649999 0.291136 -0.404557 5.200000
4.946139 1.019041 -1.725006 0.320251 -0.388875 5.200000
4.779683 0.961097 -1.800001 0.349329 -0.372204 5.200000
4.607974 0.895714 -1.875000 0.378200 -0.355246 5.200000
4.431271 0.822533 -1.950496 0.406789 -0.338751 5.200000
4.250385 0.741554 -2.000000 0.434815 -0.318917 5.200000
4.070054 0.654865 -2.000000 0.460877 -0.291158 5.200000
3.892014 0.563766 -2.000000 0.484760 -0.268184 5.200000
3.716116 0.468586 -2.000000 0.506855 -0.249108 5.200000
3.542284 0.369687 -2.000000 0.527545 -0.233834 5.200000
3.370462 0.267325 -2.000000 0.546464 -0.202830 5.200000
3.200369 0.162127 -2.000000 0.560189 -0.124053 5.200000
3.031196 0.055155 -1.991580 0.566032 -0.022817 5.200000
2.865721 -0.049857 -1.922983 0.564019 0.077176 5.200000
2.705954 -0.149992 -1.847989 0.554331 0.177182 5.200000
2.551292 -0.244088 -1.772981 0.537770 0.277175 5.200000
2.401268 -0.331346 -1.697986 0.514372 0.377180 5.200000
2.255559 -0.410942 -1.622988 0.484404 0.477183 5.200000
2.114025 -0.482265 -1.547087 0.447641 0.586491 5.200000
1.975836 -0.545242 -1.482772 0.407238 0.593400 5.200000
1.842113 -0.599883 -1.407158 0.368574 0.593400 5.200000
1.713467 -0.646878 -1.332154 0.331920 0.593400 5.200000
1.590358 -0.686938 -1.257151 0.297269 0.593400 5.200000
1.473181 -0.720754 -1.182159 0.264620 0.593400 5.200000
1.362264 -0.748997 -1.107154 0.233982 0.593400 5.200000
1.257871 -0.772299 -1.032158 0.205353 0.593400 5.200000
1.160241 -0.791282 -0.957157 0.178730 0.593400 5.200000
1.069543 -0.806517 -0.882155 0.154118 0.593400 5.200000
0.985936 -0.818544 -0.807153 0.131506 0.593400 5.200000
0.909540 -0.827845 -0.732160 0.110907 0.593400 5.200000
0.840431 -0.834894 -0.657156 0.092315 0.593400 5.200000
0.778690 -0.840094 -0.582152 0.075731 0.593400 5.200000
0.724358 -0.843818 -0.507158 0.061148 0.593400 5.200000
0.677455 -0.846394 -0.432156 0.048583 0.593400 5.200000
0.638024 -0.848106 -0.357155 0.038013 0.593400 5.200000
0.606070 -0.849176 -0.282154 0.029463 0.593400 5.200000
0.581629 -0.849817 -0.207157 0.022900 0.590895 5.200000
0.564676 -0.850169 -0.132153 0.018634 0.513676 5.200000
0.555209 -0.850341 -0.057150 0.016720 0.413680 5.200000
0.553361 -0.850370 0.017843 0.016414 0.313683 5.200000
0.558767 -0.850283 0.092847 0.016964 0.213679 5.200000
0.571796 -0.850050 0.169033 0.017797 0.112795 5.200000
0.591645 -0.849691 0.208993 0.018340 0.050354 5.200000
0.608280 -0.849387 0.127974 0.019013 0.158385 5.200000
0.617367 -0.849204 0.052971 0.019758 0.258382 5.200000
0.618759 -0.849176 -0.022030 0.019902 0.358379 5.200000
0.612942 -0.849290 -0.097025 0.018868 0.458381 5.200000
0.599494 -0.849523 -0.172029 0.015859 0.563026 5.200000
0.578683 -0.849803 -0.237738 0.010356 0.593400 5.200000
0.558238 -0.849960 -0.165395 0.004880 0.593400 5.200000
0.545418 -0.850000 -0.090392 0.001453 0.593400 5.200000
