# Supplementary material for: Automatic Parking Controller with a Twin Artificial Neural Network Architecture
Source: Hindawi journal article supplement (doi:10.1155/2019/4801985), 2019-01-01
Supplement: f1 [file 4801985.f1.zip › data/data_206.txt]

7.000000 1.300000 -0.000000 0.000000 0.000000 5.200000
6.996313 1.300000 -0.075001 0.000036 -0.019917 5.200000
6.984986 1.300000 -0.150001 0.000278 -0.050717 5.200000
6.966265 1.299986 -0.224996 0.000899 -0.081062 5.200000
6.939991 1.299954 -0.300003 0.002091 -0.111224 5.200000
6.906261 1.299844 -0.374997 0.004017 -0.141089 5.200000
6.864991 1.299620 -0.450004 0.006879 -0.170558 5.200000
6.816262 1.299199 -0.524998 0.010840 -0.199236 5.200000
6.760004 1.298437 -0.599996 0.016071 -0.224414 5.200000
6.696272 1.297217 -0.675000 0.022648 -0.249124 5.200000
6.625039 1.295312 -0.749997 0.030770 -0.273843 5.200000
6.546353 1.292517 -0.825001 0.040571 -0.298567 5.200000
6.460185 1.288516 -0.899999 0.052250 -0.323286 5.200000
6.366608 1.282999 -0.975001 0.065970 -0.347826 5.200000
6.265629 1.275527 -1.049997 0.081821 -0.368083 5.200000
6.157328 1.265682 -1.125002 0.099708 -0.383861 5.200000
6.041776 1.252965 -1.199998 0.119578 -0.396198 5.200000
5.919085 1.236881 -1.275004 0.141306 -0.404577 5.200000
5.789362 1.216880 -1.350000 0.164731 -0.408971 5.200000
5.652790 1.192436 -1.424995 0.189614 -0.409232 5.200000
5.509537 1.162995 -1.500001 0.215701 -0.405838 5.200000
5.359817 1.128057 -1.574996 0.242752 -0.399379 5.200000
5.203849 1.087119 -1.650002 0.270511 -0.390557 5.200000
5.041905 1.039725 -1.724998 0.298784 -0.380103 5.200000
4.874234 0.985426 -1.799999 0.327412 -0.368754 5.200000
4.701119 0.923815 -1.874998 0.356284 -0.357203 5.200000
4.522858 0.854497 -1.953271 0.385358 -0.346408 5.200000
4.340180 0.777255 -1.988663 0.414390 -0.331403 5.200000
4.158323 0.694239 -2.000000 0.441843 -0.308983 5.200000
3.978657 0.606374 -2.000000 0.467517 -0.290610 5.200000
3.801237 0.514069 -2.000000 0.491813 -0.276214 5.200000
3.626063 0.417566 -2.000000 0.515039 -0.265359 5.200000
3.453127 0.317110 -2.000000 0.537170 -0.250284 5.200000
3.282266 0.213173 -2.000000 0.554545 -0.167774 5.200000
3.112773 0.106923 -1.999575 0.564121 -0.071102 5.200000
2.944916 0.000328 -1.961018 0.565634 0.028904 5.200000
2.782420 -0.102327 -1.884192 0.559910 0.128901 5.200000
2.625363 -0.199470 -1.809196 0.546617 0.228899 5.200000
2.473145 -0.290125 -1.734190 0.526516 0.328897 5.200000
2.325384 -0.373513 -1.659194 0.499693 0.428905 5.200000
2.181822 -0.448918 -1.584185 0.466284 0.529049 5.200000
2.042073 -0.515909 -1.515387 0.426694 0.593400 5.200000
1.906074 -0.574502 -1.443364 0.386990 0.593400 5.200000
1.774910 -0.625098 -1.368369 0.349366 0.593400 5.200000
1.649087 -0.668420 -1.293367 0.313743 0.593400 5.200000
1.528991 -0.705170 -1.218365 0.280132 0.593400 5.200000
1.415016 -0.736012 -1.143364 0.248523 0.593400 5.200000
1.307442 -0.761626 -1.068369 0.218927 0.593400 5.200000
1.206518 -0.782623 -0.993365 0.191330 0.593400 5.200000
1.112454 -0.799592 -0.918361 0.165746 0.593400 5.200000
1.025409 -0.813104 -0.843369 0.142172 0.593400 5.200000
0.945519 -0.823662 -0.768365 0.120601 0.593400 5.200000
0.872878 -0.831745 -0.693366 0.101043 0.593400 5.200000
0.807577 -0.837792 -0.618365 0.083485 0.593400 5.200000
0.749664 -0.842180 -0.543366 0.067937 0.593400 5.200000
0.699167 -0.845273 -0.468362 0.054404 0.593400 5.200000
0.656126 -0.847372 -0.393370 0.042870 0.593400 5.200000
0.620559 -0.848722 -0.318367 0.033338 0.593400 5.200000
0.592493 -0.849553 -0.243363 0.025825 0.593400 5.200000
0.571922 -0.850026 -0.168367 0.020359 0.566947 5.200000
0.558848 -0.850274 -0.093366 0.017401 0.461959 5.200000
0.553215 -0.850370 -0.018364 0.016401 0.361962 5.200000
0.555168 -0.850342 0.056638 0.016621 0.261965 5.200000
0.564568 -0.850178 0.131632 0.017400 0.161957 5.200000
0.581566 -0.849878 0.203316 0.018113 0.062451 5.200000
0.601232 -0.849513 0.164180 0.018643 0.110098 5.200000
0.613899 -0.849276 0.089187 0.019426 0.210103 5.200000
0.619110 -0.849171 0.014185 0.019954 0.310100 5.200000
0.616748 -0.849215 -0.060819 0.019574 0.410096 5.200000
0.606921 -0.849400 -0.135817 0.017606 0.510105 5.200000
0.589542 -0.849670 -0.213462 0.013278 0.593400 5.200000
0.567101 -0.849900 -0.202024 0.007254 0.593400 5.200000
0.550679 -0.849989 -0.126599 0.002857 0.593400 5.200000
