# Supplementary material for: Automatic Parking Controller with a Twin Artificial Neural Network Architecture
Source: Hindawi journal article supplement (doi:10.1155/2019/4801985), 2019-01-01
Supplement: f1 [file 4801985.f1.zip › data/data_207.txt]

7.100000 1.300000 0.000000 0.000000 0.000000 5.200000
7.096319 1.300000 -0.074999 0.000034 -0.017296 5.200000
7.084981 1.300000 -0.149998 0.000269 -0.046102 5.200000
7.066269 1.299987 -0.224997 0.000844 -0.074410 5.200000
7.039990 1.299957 -0.299996 0.001965 -0.102496 5.200000
7.006261 1.299853 -0.374995 0.003767 -0.130178 5.200000
6.964995 1.299649 -0.450003 0.006428 -0.155611 5.200000
6.916262 1.299247 -0.525004 0.010074 -0.180310 5.200000
6.860006 1.298552 -0.600003 0.014849 -0.205029 5.200000
6.796271 1.297418 -0.675002 0.020925 -0.229745 5.200000
6.725037 1.295665 -0.750001 0.028451 -0.254464 5.200000
6.646335 1.293071 -0.825000 0.037603 -0.279176 5.200000
6.560161 1.289359 -0.899999 0.048523 -0.302345 5.200000
6.466549 1.284233 -0.974998 0.061252 -0.321827 5.200000
6.365549 1.277303 -1.049997 0.075823 -0.339179 5.200000
6.257173 1.268180 -1.124996 0.092250 -0.353949 5.200000
6.141522 1.256429 -1.199995 0.110491 -0.365824 5.200000
6.018665 1.241560 -1.275003 0.130486 -0.374612 5.200000
5.888737 1.223086 -1.350004 0.152102 -0.380145 5.200000
5.751836 1.200485 -1.425003 0.175202 -0.382605 5.200000
5.608159 1.173247 -1.500002 0.199588 -0.382177 5.200000
5.457857 1.140836 -1.575001 0.225082 -0.379215 5.200000
5.301170 1.102775 -1.650000 0.251517 -0.374363 5.200000
5.138329 1.058551 -1.724999 0.278728 -0.368183 5.200000
4.969573 1.007696 -1.799998 0.306626 -0.361352 5.200000
4.795216 0.949741 -1.874997 0.335117 -0.354514 5.200000
4.615538 0.884213 -1.950156 0.364227 -0.348489 5.200000
4.431433 0.810886 -2.000000 0.393732 -0.339447 5.200000
4.247758 0.731474 -2.000000 0.422140 -0.320983 5.200000
4.066456 0.647069 -2.000000 0.449125 -0.307032 5.200000
3.887445 0.557886 -2.000000 0.475093 -0.297048 5.200000
3.710773 0.464164 -2.000000 0.500388 -0.290803 5.200000
3.536502 0.366026 -2.000000 0.525334 -0.285382 5.200000
3.364623 0.263782 -2.000000 0.546908 -0.220318 5.200000
3.194586 0.158487 -2.000000 0.560586 -0.119447 5.200000
3.025602 0.051620 -1.986779 0.565978 -0.019453 5.200000
2.860248 -0.053328 -1.921155 0.563794 0.080551 5.200000
2.700666 -0.153263 -1.845454 0.553893 0.180555 5.200000
2.546167 -0.247155 -1.770455 0.537088 0.280548 5.200000
2.396293 -0.334154 -1.695456 0.513478 0.380552 5.200000
2.250718 -0.413491 -1.620456 0.483274 0.480553 5.200000
2.109322 -0.484521 -1.544637 0.446297 0.589034 5.200000
1.971252 -0.547216 -1.480151 0.405903 0.593400 5.200000
1.837692 -0.601588 -1.404631 0.367306 0.593400 5.200000
1.709226 -0.648337 -1.329627 0.330719 0.593400 5.200000
1.586312 -0.688174 -1.254624 0.296136 0.593400 5.200000
1.469340 -0.721792 -1.179631 0.263555 0.593400 5.200000
1.358637 -0.749861 -1.104627 0.232985 0.593400 5.200000
1.254469 -0.773007 -1.029630 0.204422 0.593400 5.200000
1.157070 -0.791853 -0.954629 0.177868 0.593400 5.200000
1.066611 -0.806971 -0.879628 0.153324 0.593400 5.200000
0.983245 -0.818899 -0.804625 0.130779 0.593400 5.200000
0.907091 -0.828117 -0.729632 0.110248 0.593400 5.200000
0.838229 -0.835098 -0.654628 0.091722 0.593400 5.200000
0.776738 -0.840241 -0.579624 0.075207 0.593400 5.200000
0.722656 -0.843922 -0.504631 0.060692 0.593400 5.200000
0.676008 -0.846464 -0.429629 0.048195 0.593400 5.200000
0.636825 -0.848151 -0.354627 0.037692 0.593400 5.200000
0.605121 -0.849204 -0.279626 0.029209 0.593400 5.200000
0.580932 -0.849833 -0.204630 0.022710 0.590112 5.200000
0.564233 -0.850177 -0.129626 0.018535 0.510306 5.200000
0.555035 -0.850344 -0.054622 0.016691 0.410310 5.200000
0.553382 -0.850370 0.020370 0.016416 0.310313 5.200000
0.559091 -0.850277 0.095374 0.016992 0.210309 5.200000
0.572370 -0.850040 0.171716 0.017823 0.109310 5.200000
0.592326 -0.849678 0.206559 0.018357 0.053598 5.200000
0.608705 -0.849379 0.125447 0.019040 0.161755 5.200000
0.617519 -0.849201 0.050444 0.019775 0.261752 5.200000
0.618699 -0.849177 -0.024558 0.019893 0.361749 5.200000
0.612603 -0.849297 -0.099552 0.018801 0.461752 5.200000
0.598907 -0.849532 -0.174557 0.015711 0.567478 5.200000
0.577900 -0.849810 -0.236369 0.010146 0.593400 5.200000
0.557692 -0.849962 -0.162867 0.004734 0.593400 5.200000
0.545122 -0.850000 -0.087865 0.001374 0.593400 5.200000
