# Supplementary material for: Automatic Parking Controller with a Twin Artificial Neural Network Architecture
Source: Hindawi journal article supplement (doi:10.1155/2019/4801985), 2019-01-01
Supplement: f1 [file 4801985.f1.zip › data/data_208.txt]

7.200000 1.300000 0.000000 0.000000 0.000000 5.200000
7.196327 1.300000 -0.075004 0.000033 -0.015085 5.200000
7.184973 1.300000 -0.149997 0.000252 -0.041469 5.200000
7.166272 1.299987 -0.224999 0.000788 -0.066763 5.200000
7.139987 1.299959 -0.300002 0.001820 -0.091459 5.200000
7.106264 1.299872 -0.375004 0.003462 -0.116175 5.200000
7.064991 1.299678 -0.449998 0.005891 -0.140896 5.200000
7.016257 1.299310 -0.525001 0.009245 -0.165619 5.200000
6.960008 1.298670 -0.599999 0.013686 -0.190349 5.200000
6.896258 1.297621 -0.674998 0.019366 -0.214707 5.200000
6.825037 1.295997 -0.750001 0.026404 -0.237015 5.200000
6.746320 1.293583 -0.825004 0.034904 -0.258116 5.200000
6.660140 1.290153 -0.899996 0.044956 -0.277759 5.200000
6.566506 1.285395 -0.975000 0.056640 -0.295740 5.200000
6.465469 1.279005 -1.050003 0.070002 -0.311783 5.200000
6.357038 1.270582 -1.124999 0.085070 -0.325677 5.200000
6.241298 1.259751 -1.199999 0.101829 -0.337214 5.200000
6.118312 1.246039 -1.275003 0.120219 -0.346287 5.200000
5.988175 1.229010 -1.349995 0.140179 -0.352840 5.200000
5.851003 1.208159 -1.424998 0.161597 -0.356956 5.200000
5.706937 1.182989 -1.500001 0.184357 -0.358893 5.200000
5.556147 1.153009 -1.575002 0.208332 -0.358897 5.200000
5.398814 1.117671 -1.649997 0.233417 -0.357388 5.200000
5.235175 1.076511 -1.725000 0.259503 -0.354997 5.200000
5.065450 1.028979 -1.800004 0.286541 -0.352257 5.200000
4.889942 0.974593 -1.874996 0.314513 -0.349827 5.200000
4.708931 0.912794 -1.953811 0.343492 -0.348710 5.200000
4.523199 0.843216 -1.988804 0.373301 -0.343904 5.200000
4.338161 0.767609 -2.000000 0.402394 -0.330726 5.200000
4.155259 0.686690 -2.000000 0.430498 -0.321211 5.200000
3.974676 0.600738 -2.000000 0.457980 -0.315795 5.200000
3.796513 0.509878 -2.000000 0.485179 -0.314273 5.200000
3.620885 0.414220 -2.000000 0.512397 -0.315764 5.200000
3.447855 0.313920 -2.000000 0.537288 -0.264667 5.200000
3.277021 0.209932 -2.000000 0.554935 -0.168031 5.200000
3.107527 0.103597 -1.998096 0.564467 -0.068026 5.200000
2.939813 -0.002916 -1.956412 0.565655 0.031968 5.200000
2.777520 -0.105399 -1.881897 0.559622 0.131972 5.200000
2.620620 -0.202357 -1.806894 0.546086 0.231967 5.200000
2.468546 -0.292791 -1.731890 0.525794 0.331969 5.200000
2.320915 -0.375953 -1.656895 0.498760 0.431974 5.200000
2.177484 -0.451089 -1.581817 0.465150 0.532770 5.200000
2.037828 -0.517835 -1.513666 0.425432 0.593400 5.200000
1.901972 -0.576171 -1.441061 0.385805 0.593400 5.200000
1.770965 -0.626533 -1.366066 0.348243 0.593400 5.200000
1.645313 -0.669642 -1.291065 0.312681 0.593400 5.200000
1.525400 -0.706201 -1.216062 0.279132 0.593400 5.200000
1.411617 -0.736873 -1.141061 0.247584 0.593400 5.200000
1.304243 -0.762336 -1.066067 0.218050 0.593400 5.200000
1.203527 -0.783201 -0.991063 0.190515 0.593400 5.200000
1.109677 -0.800056 -0.916059 0.164992 0.593400 5.200000
1.022851 -0.813469 -0.841066 0.141480 0.593400 5.200000
0.943181 -0.823945 -0.766063 0.119971 0.593400 5.200000
0.870762 -0.831959 -0.691063 0.100474 0.593400 5.200000
0.805688 -0.837950 -0.616062 0.082978 0.593400 5.200000
0.748003 -0.842293 -0.541064 0.067491 0.593400 5.200000
0.697736 -0.845350 -0.466060 0.054020 0.593400 5.200000
0.654925 -0.847424 -0.391068 0.042548 0.593400 5.200000
0.619585 -0.848754 -0.316065 0.033077 0.593400 5.200000
0.591748 -0.849573 -0.241060 0.025625 0.593400 5.200000
0.571405 -0.850037 -0.166064 0.020230 0.563792 5.200000
0.558565 -0.850279 -0.091063 0.017346 0.458889 5.200000
0.553210 -0.850370 -0.016061 0.016400 0.358892 5.200000
0.555353 -0.850339 0.058941 0.016641 0.258895 5.200000
0.564981 -0.850170 0.133934 0.017427 0.158887 5.200000
0.582222 -0.849866 0.205067 0.018126 0.059477 5.200000
0.601734 -0.849504 0.161878 0.018665 0.113169 5.200000
0.614162 -0.849271 0.086885 0.019449 0.213173 5.200000
0.619141 -0.849170 0.011883 0.019958 0.313170 5.200000
0.616546 -0.849219 -0.063121 0.019539 0.413166 5.200000
0.606496 -0.849407 -0.138120 0.017511 0.513175 5.200000
0.588874 -0.849679 -0.216530 0.013099 0.593400 5.200000
0.566487 -0.849905 -0.199844 0.007090 0.593400 5.200000
0.550302 -0.849990 -0.124296 0.002757 0.593400 5.200000
