# Supplementary material for: Automatic Parking Controller with a Twin Artificial Neural Network Architecture
Source: Hindawi journal article supplement (doi:10.1155/2019/4801985), 2019-01-01
Supplement: f1 [file 4801985.f1.zip › data/data_209.txt]

6.400000 1.400000 0.000000 0.000000 0.000000 5.200000
6.396274 1.400000 -0.074998 0.000054 -0.043221 5.200000
6.385024 1.400000 -0.149999 0.000418 -0.092590 5.200000
6.366241 1.399983 -0.225004 0.001403 -0.142516 5.200000
6.340008 1.399922 -0.299997 0.003293 -0.193496 5.200000
6.306247 1.399756 -0.375002 0.006452 -0.246038 5.200000
6.265001 1.399400 -0.450001 0.011229 -0.300985 5.200000
6.216257 1.398685 -0.525000 0.018074 -0.359885 5.200000
6.160015 1.397418 -0.599998 0.027528 -0.425746 5.200000
6.096313 1.395262 -0.674999 0.040426 -0.508668 5.200000
6.025135 1.391777 -0.750004 0.057631 -0.549746 5.200000
5.946575 1.386454 -0.824997 0.078021 -0.571967 5.200000
5.860673 1.378747 -0.900002 0.100892 -0.575450 5.200000
5.767525 1.368149 -0.975001 0.125778 -0.575409 5.200000
5.667258 1.354107 -1.050001 0.152650 -0.575217 5.200000
5.560021 1.336010 -1.125006 0.181525 -0.575181 5.200000
5.446025 1.313275 -1.199999 0.212383 -0.575612 5.200000
5.325501 1.285200 -1.275004 0.245237 -0.576051 5.200000
5.198766 1.251131 -1.349998 0.280077 -0.575332 5.200000
5.066157 1.210330 -1.425003 0.316885 -0.573655 5.200000
4.928104 1.162072 -1.500001 0.355714 -0.574213 5.200000
4.785120 1.105614 -1.575001 0.396494 -0.577321 5.200000
4.637671 1.040335 -1.650006 0.435698 -0.505084 5.200000
4.485980 0.966436 -1.724999 0.469953 -0.426814 5.200000
4.330077 0.884223 -1.800005 0.499379 -0.356629 5.200000
4.169941 0.794130 -1.874998 0.524744 -0.296123 5.200000
4.005506 0.696470 -1.950221 0.546210 -0.237832 5.200000
3.837049 0.591939 -1.999153 0.563559 -0.177920 5.200000
3.668639 0.483946 -2.000000 0.575991 -0.116340 5.200000
3.501377 0.374296 -2.000000 0.583691 -0.058628 5.200000
3.334710 0.263742 -2.000000 0.586701 -0.007235 5.200000
3.168121 0.153068 -2.000000 0.585075 0.042579 5.200000
3.001188 0.043155 -1.986134 0.578701 0.098006 5.200000
2.837277 -0.062794 -1.913367 0.568248 0.148819 5.200000
2.678510 -0.162711 -1.838362 0.554378 0.201208 5.200000
2.524592 -0.256192 -1.763369 0.536298 0.296018 5.200000
2.375225 -0.342649 -1.688364 0.511595 0.396019 5.200000
2.230084 -0.421291 -1.613364 0.480282 0.496019 5.200000
2.089019 -0.491531 -1.538498 0.442301 0.593400 5.200000
1.951679 -0.553216 -1.468143 0.401973 0.593400 5.200000
1.818983 -0.606654 -1.393088 0.363683 0.593400 5.200000
1.691452 -0.652558 -1.318084 0.327400 0.593400 5.200000
1.569509 -0.691650 -1.243080 0.293124 0.593400 5.200000
1.453555 -0.724627 -1.168087 0.260859 0.593400 5.200000
1.343891 -0.752126 -1.093082 0.230595 0.593400 5.200000
1.240799 -0.774797 -1.018083 0.202345 0.593400 5.200000
1.144498 -0.793236 -0.943085 0.176098 0.593400 5.200000
1.055154 -0.808024 -0.868081 0.151864 0.593400 5.200000
0.972920 -0.819679 -0.793088 0.129630 0.593400 5.200000
0.897899 -0.828685 -0.718083 0.109409 0.593400 5.200000
0.830186 -0.835498 -0.643086 0.091191 0.593400 5.200000
0.769846 -0.840520 -0.568086 0.074979 0.593400 5.200000
0.716903 -0.844125 -0.493082 0.060774 0.593400 5.200000
0.671405 -0.846609 -0.418089 0.048580 0.593400 5.200000
0.633388 -0.848265 -0.343084 0.038398 0.593400 5.200000
0.602854 -0.849312 -0.268088 0.030222 0.593400 5.200000
0.579810 -0.849937 -0.193087 0.024069 0.575505 5.200000
0.564233 -0.850290 -0.118084 0.020466 0.471939 5.200000
0.556089 -0.850450 -0.043082 0.018999 0.371939 5.200000
0.555609 -0.850457 0.031913 0.018902 0.271940 5.200000
0.562541 -0.850320 0.106918 0.019500 0.171941 5.200000
0.577004 -0.850039 0.182037 0.020175 0.071774 5.200000
0.598103 -0.849608 0.207107 0.020465 0.042644 5.200000
0.615332 -0.849248 0.134642 0.021056 0.140161 5.200000
0.625052 -0.849040 0.059637 0.021774 0.240164 5.200000
0.627277 -0.848992 -0.015358 0.022008 0.340166 5.200000
0.621950 -0.849107 -0.090360 0.021116 0.440167 5.200000
0.609158 -0.849359 -0.165362 0.018364 0.541532 5.200000
0.588749 -0.849682 -0.241371 0.013056 0.593400 5.200000
0.565839 -0.849907 -0.196846 0.006913 0.593400 5.200000
0.549915 -0.849983 -0.121845 0.002651 0.593400 5.200000
