# Supplementary material for: Automatic Parking Controller with a Twin Artificial Neural Network Architecture
Source: Hindawi journal article supplement (doi:10.1155/2019/4801985), 2019-01-01
Supplement: f1 [file 4801985.f1.zip › data/data_210.txt]

6.500000 1.400000 0.000000 0.000000 0.000000 5.200000
6.496281 1.400000 -0.075001 0.000052 -0.038113 5.200000
6.485018 1.400000 -0.150001 0.000391 -0.083242 5.200000
6.466242 1.399984 -0.225002 0.001288 -0.128581 5.200000
6.440010 1.399926 -0.300002 0.003016 -0.174459 5.200000
6.406238 1.399778 -0.375003 0.005882 -0.221080 5.200000
6.365009 1.399451 -0.450004 0.010188 -0.268777 5.200000
6.316249 1.398809 -0.525004 0.016283 -0.318013 5.200000
6.260016 1.397663 -0.600005 0.024556 -0.369657 5.200000
6.196297 1.395763 -0.674995 0.035483 -0.425459 5.200000
6.125109 1.392745 -0.749996 0.049707 -0.495433 5.200000
6.046502 1.388133 -0.824996 0.068003 -0.530245 5.200000
5.960513 1.381351 -0.899997 0.089440 -0.554937 5.200000
5.867253 1.371851 -0.974998 0.113981 -0.575189 5.200000
5.766822 1.358973 -1.049998 0.140869 -0.574871 5.200000
5.659387 1.342166 -1.124999 0.169735 -0.575212 5.200000
5.545133 1.320755 -1.199999 0.200599 -0.575908 5.200000
5.424284 1.294118 -1.275000 0.233445 -0.575461 5.200000
5.297157 1.261544 -1.350001 0.268254 -0.573528 5.200000
5.164065 1.222308 -1.425001 0.305086 -0.573514 5.200000
5.025466 1.175694 -1.500002 0.343952 -0.577976 5.200000
4.881785 1.120982 -1.575002 0.382579 -0.522916 5.200000
4.733291 1.058148 -1.650003 0.417112 -0.453015 5.200000
4.580122 0.987331 -1.725003 0.448136 -0.397176 5.200000
4.422396 0.908690 -1.800004 0.476133 -0.345671 5.200000
4.260182 0.822376 -1.875004 0.501146 -0.296220 5.200000
4.093503 0.728588 -1.951963 0.523119 -0.247729 5.200000
3.922701 0.627880 -1.997206 0.541702 -0.196821 5.200000
3.752128 0.523459 -2.000000 0.556079 -0.143092 5.200000
3.582832 0.416965 -2.000000 0.566276 -0.093490 5.200000
3.414431 0.309063 -2.000000 0.572647 -0.046318 5.200000
3.246518 0.200416 -2.000000 0.575172 -0.005812 5.200000
3.078670 0.091662 -2.000000 0.573777 0.032288 5.200000
2.911991 -0.015522 -1.949294 0.568568 0.072504 5.200000
2.750612 -0.117767 -1.872710 0.560128 0.150093 5.200000
2.594483 -0.214221 -1.797710 0.545341 0.250232 5.200000
2.443078 -0.303983 -1.722709 0.523744 0.350231 5.200000
2.296030 -0.386292 -1.647708 0.495438 0.450226 5.200000
2.153124 -0.460427 -1.572499 0.460462 0.554821 5.200000
2.014028 -0.526037 -1.502463 0.420180 0.593400 5.200000
1.879133 -0.583160 -1.427427 0.380971 0.593400 5.200000
1.749177 -0.632427 -1.352428 0.343763 0.593400 5.200000
1.624626 -0.674554 -1.277426 0.308570 0.593400 5.200000
1.505889 -0.710243 -1.202426 0.275381 0.593400 5.200000
1.393308 -0.740171 -1.127423 0.244200 0.593400 5.200000
1.287172 -0.764975 -1.052429 0.215032 0.593400 5.200000
1.187740 -0.785281 -0.977424 0.187868 0.593400 5.200000
1.095190 -0.801675 -0.902429 0.162709 0.593400 5.200000
1.009689 -0.814691 -0.827427 0.139558 0.593400 5.200000
0.931348 -0.824861 -0.752425 0.118419 0.593400 5.200000
0.860278 -0.832626 -0.677430 0.099284 0.593400 5.200000
0.796558 -0.838417 -0.602425 0.082152 0.593400 5.200000
0.740228 -0.842629 -0.527431 0.067034 0.593400 5.200000
0.691318 -0.845587 -0.452428 0.053916 0.593400 5.200000
0.649870 -0.847598 -0.377427 0.042807 0.593400 5.200000
0.615900 -0.848893 -0.302432 0.033716 0.593400 5.200000
0.589433 -0.849695 -0.227427 0.026618 0.591597 5.200000
0.570448 -0.850151 -0.152423 0.021811 0.517734 5.200000
0.558924 -0.850392 -0.077430 0.019465 0.417733 5.200000
0.555110 -0.850469 -0.002425 0.018850 0.317732 5.200000
0.558428 -0.850399 0.072572 0.019177 0.217729 5.200000
0.569447 -0.850184 0.147571 0.019894 0.117727 5.200000
0.587958 -0.849815 0.221604 0.020373 0.019026 5.200000
0.608375 -0.849397 0.169471 0.020730 0.093862 5.200000
0.621537 -0.849112 0.093981 0.021471 0.194373 5.200000
0.627016 -0.848999 0.018984 0.021978 0.294372 5.200000
0.625352 -0.849039 -0.056021 0.021714 0.394372 5.200000
0.615943 -0.849231 -0.131014 0.019907 0.494372 5.200000
0.599095 -0.849529 -0.206610 0.015804 0.588495 5.200000
0.575740 -0.849827 -0.236406 0.009567 0.593400 5.200000
0.556272 -0.849961 -0.156184 0.004354 0.593400 5.200000
0.544411 -0.850000 -0.081190 0.001178 0.593400 5.200000
