# Supplementary material for: Automatic Parking Controller with a Twin Artificial Neural Network Architecture
Source: Hindawi journal article supplement (doi:10.1155/2019/4801985), 2019-01-01
Supplement: f1 [file 4801985.f1.zip › data/data_211.txt]

6.600000 1.400000 0.000000 0.000000 0.000000 5.200000
6.596285 1.400000 -0.075002 0.000050 -0.034235 5.200000
6.585020 1.400000 -0.150003 0.000367 -0.076217 5.200000
6.566243 1.399985 -0.224995 0.001202 -0.118211 5.200000
6.540013 1.399931 -0.299998 0.002812 -0.160464 5.200000
6.506245 1.399790 -0.375000 0.005470 -0.203046 5.200000
6.465013 1.399494 -0.450002 0.009438 -0.246065 5.200000
6.416251 1.398896 -0.525004 0.015025 -0.289647 5.200000
6.360020 1.397847 -0.599995 0.022544 -0.334031 5.200000
6.296280 1.396106 -0.674997 0.032339 -0.379548 5.200000
6.225100 1.393365 -0.749999 0.044806 -0.426836 5.200000
6.146448 1.389241 -0.825001 0.060438 -0.478161 5.200000
6.060414 1.383216 -0.900004 0.079716 -0.516015 5.200000
5.967052 1.374715 -0.974995 0.102281 -0.540195 5.200000
5.866472 1.363087 -1.049997 0.128037 -0.566241 5.200000
5.758833 1.347668 -1.124999 0.156772 -0.575607 5.200000
5.644296 1.327744 -1.200001 0.187634 -0.575718 5.200000
5.523130 1.302679 -1.275003 0.220458 -0.573699 5.200000
5.395571 1.271747 -1.349997 0.255275 -0.572581 5.200000
5.262002 1.234249 -1.424997 0.292156 -0.576921 5.200000
5.122774 1.189490 -1.499999 0.329095 -0.530166 5.200000
4.978176 1.137267 -1.575000 0.363439 -0.477208 5.200000
4.828420 1.077488 -1.650002 0.395450 -0.430795 5.200000
4.673710 1.010117 -1.725000 0.425286 -0.387041 5.200000
4.514204 0.935140 -1.799996 0.452921 -0.344671 5.200000
4.350046 0.852601 -1.874998 0.478249 -0.302999 5.200000
4.181295 0.762601 -1.950384 0.501127 -0.261578 5.200000
4.008435 0.665549 -1.999064 0.521259 -0.217520 5.200000
3.835801 0.564444 -2.000000 0.537660 -0.170121 5.200000
3.664705 0.460869 -2.000000 0.550377 -0.126722 5.200000
3.494763 0.355438 -2.000000 0.559691 -0.086144 5.200000
3.325641 0.248673 -2.000000 0.565886 -0.047392 5.200000
3.157000 0.141126 -2.000000 0.569012 -0.011650 5.200000
2.988713 0.033429 -1.980785 0.568868 0.013483 5.200000
2.824695 -0.071065 -1.907454 0.564596 0.103496 5.200000
2.666208 -0.170311 -1.832453 0.553061 0.203900 5.200000
2.512666 -0.263278 -1.757450 0.534583 0.303902 5.200000
2.363637 -0.349126 -1.682459 0.509375 0.403905 5.200000
2.218822 -0.427145 -1.607457 0.477521 0.503903 5.200000
2.078049 -0.496706 -1.533135 0.439120 0.593400 5.200000
1.941048 -0.557714 -1.462174 0.398883 0.593400 5.200000
1.808739 -0.610538 -1.387179 0.360750 0.593400 5.200000
1.681633 -0.655880 -1.312174 0.324626 0.593400 5.200000
1.560150 -0.694462 -1.237170 0.290507 0.593400 5.200000
1.444684 -0.726981 -1.162176 0.258402 0.593400 5.200000
1.335525 -0.754079 -1.087173 0.228296 0.593400 5.200000
1.232960 -0.776398 -1.012172 0.200204 0.593400 5.200000
1.137201 -0.794529 -0.937176 0.174114 0.593400 5.200000
1.048416 -0.809048 -0.862171 0.150039 0.593400 5.200000
0.966748 -0.820478 -0.787178 0.127964 0.593400 5.200000
0.892296 -0.829296 -0.712174 0.107900 0.593400 5.200000
0.825161 -0.835954 -0.637175 0.089840 0.593400 5.200000
0.765404 -0.840851 -0.562177 0.073787 0.593400 5.200000
0.713051 -0.844356 -0.487172 0.059741 0.593400 5.200000
0.668140 -0.846766 -0.412180 0.047705 0.593400 5.200000
0.630705 -0.848366 -0.337175 0.037681 0.593400 5.200000
0.600760 -0.849376 -0.262177 0.029662 0.593400 5.200000
0.578311 -0.849972 -0.187176 0.023693 0.569039 5.200000
0.563350 -0.850308 -0.112174 0.020291 0.464059 5.200000
0.555788 -0.850456 -0.037172 0.018952 0.364058 5.200000
0.555921 -0.850450 0.037823 0.018935 0.264059 5.200000
0.563416 -0.850302 0.112828 0.019558 0.164060 5.200000
0.578470 -0.850009 0.189129 0.020210 0.062319 5.200000
0.599732 -0.849575 0.203399 0.020487 0.048377 5.200000
0.616375 -0.849226 0.128732 0.021118 0.148041 5.200000
0.625536 -0.849031 0.053727 0.021821 0.248043 5.200000
0.627120 -0.848996 -0.021269 0.021985 0.348045 5.200000
0.621243 -0.849122 -0.096270 0.020984 0.448047 5.200000
0.607833 -0.849382 -0.171273 0.018046 0.548870 5.200000
0.586817 -0.849707 -0.246585 0.012538 0.593400 5.200000
0.564302 -0.849918 -0.190935 0.006502 0.593400 5.200000
0.548979 -0.849986 -0.115936 0.002400 0.593400 5.200000
