# Supplementary material for: Automatic Parking Controller with a Twin Artificial Neural Network Architecture
Source: Hindawi journal article supplement (doi:10.1155/2019/4801985), 2019-01-01
Supplement: f1 [file 4801985.f1.zip › data/data_212.txt]

6.700000 1.400000 0.000000 0.000000 -0.000000 5.200000
6.696294 1.400000 -0.074999 0.000043 -0.031457 5.200000
6.685008 1.400000 -0.149997 0.000345 -0.071253 5.200000
6.666252 1.399985 -0.225000 0.001145 -0.110935 5.200000
6.640005 1.399935 -0.300004 0.002672 -0.150747 5.200000
6.606244 1.399803 -0.375003 0.005176 -0.190675 5.200000
6.565006 1.399514 -0.450000 0.008927 -0.230743 5.200000
6.516253 1.398962 -0.525000 0.014180 -0.270981 5.200000
6.460021 1.397964 -0.599998 0.021212 -0.311395 5.200000
6.396282 1.396333 -0.675000 0.030318 -0.351995 5.200000
6.325085 1.393769 -0.750004 0.041820 -0.392786 5.200000
6.246423 1.389926 -0.825005 0.056043 -0.434482 5.200000
6.160358 1.384373 -0.900000 0.073308 -0.467781 5.200000
6.066931 1.376570 -0.975002 0.093503 -0.492134 5.200000
5.966237 1.365965 -1.050000 0.116598 -0.516855 5.200000
5.858402 1.351913 -1.125000 0.142854 -0.541571 5.200000
5.743603 1.333686 -1.200004 0.172520 -0.567753 5.200000
5.622048 1.310450 -1.275006 0.205271 -0.572911 5.200000
5.494047 1.281468 -1.349999 0.240058 -0.572465 5.200000
5.359894 1.246094 -1.425003 0.275045 -0.536451 5.200000
5.219850 1.203960 -1.500001 0.308919 -0.498340 5.200000
5.074180 1.154797 -1.575000 0.341506 -0.460781 5.200000
4.923121 1.098389 -1.650003 0.372679 -0.423696 5.200000
4.766910 1.034594 -1.725007 0.402304 -0.386993 5.200000
4.605731 0.963281 -1.799999 0.430227 -0.350588 5.200000
4.439767 0.884436 -1.875004 0.456327 -0.314409 5.200000
4.269126 0.798040 -1.951898 0.480442 -0.278589 5.200000
4.094342 0.704448 -1.997749 0.502247 -0.239780 5.200000
3.919955 0.606486 -2.000000 0.520707 -0.196530 5.200000
3.747249 0.505629 -2.000000 0.535800 -0.157656 5.200000
3.575919 0.402442 -2.000000 0.547884 -0.121930 5.200000
3.405705 0.297433 -2.000000 0.557167 -0.088438 5.200000
3.236339 0.191065 -2.000000 0.563866 -0.056458 5.200000
3.067508 0.083770 -1.997940 0.567969 -0.023740 5.200000
2.900825 -0.022693 -1.943209 0.567347 0.056544 5.200000
2.739806 -0.124530 -1.867593 0.559367 0.157049 5.200000
2.584017 -0.220568 -1.792591 0.544075 0.257049 5.200000
2.432911 -0.309838 -1.717593 0.522024 0.357051 5.200000
2.286158 -0.391620 -1.642594 0.493270 0.457052 5.200000
2.143537 -0.465171 -1.567259 0.457798 0.564276 5.200000
2.004684 -0.530194 -1.497568 0.417443 0.593400 5.200000
1.870108 -0.586761 -1.422313 0.378370 0.593400 5.200000
1.740505 -0.635519 -1.347312 0.341299 0.593400 5.200000
1.616337 -0.677186 -1.272310 0.306243 0.593400 5.200000
1.498012 -0.712460 -1.197312 0.273191 0.593400 5.200000
1.385864 -0.742015 -1.122307 0.242147 0.593400 5.200000
1.280175 -0.766497 -1.047314 0.213116 0.593400 5.200000
1.181206 -0.786517 -0.972310 0.186088 0.593400 5.200000
1.089132 -0.802665 -0.897313 0.161067 0.593400 5.200000
1.004119 -0.815469 -0.822313 0.138053 0.593400 5.200000
0.926271 -0.825460 -0.747309 0.117051 0.593400 5.200000
0.855696 -0.833080 -0.672316 0.098052 0.593400 5.200000
0.792478 -0.838751 -0.597311 0.081056 0.593400 5.200000
0.736655 -0.842868 -0.522315 0.066075 0.593400 5.200000
0.688259 -0.845750 -0.447314 0.053096 0.593400 5.200000
0.647317 -0.847707 -0.372311 0.042123 0.593400 5.200000
0.613852 -0.848962 -0.297317 0.033166 0.593400 5.200000
0.587893 -0.849735 -0.222312 0.026199 0.590121 5.200000
0.569428 -0.850174 -0.147308 0.021581 0.510913 5.200000
0.558444 -0.850401 -0.072315 0.019382 0.410913 5.200000
0.555068 -0.850469 0.002689 0.018844 0.310912 5.200000
0.558962 -0.850389 0.077688 0.019223 0.210910 5.200000
0.570475 -0.850164 0.152686 0.019941 0.110908 5.200000
0.589425 -0.849785 0.221023 0.020390 0.020005 5.200000
0.609507 -0.849374 0.163945 0.020774 0.101112 5.200000
0.622170 -0.849098 0.088865 0.021521 0.201194 5.200000
0.627127 -0.848996 0.013869 0.021992 0.301193 5.200000
0.624961 -0.849047 -0.061136 0.021649 0.401192 5.200000
0.615050 -0.849249 -0.136129 0.019715 0.501224 5.200000
0.597672 -0.849551 -0.211589 0.015427 0.591739 5.200000
0.574143 -0.849842 -0.229765 0.009138 0.593400 5.200000
0.555217 -0.849965 -0.151069 0.004072 0.593400 5.200000
0.543879 -0.850000 -0.076075 0.001036 0.593400 5.200000
