# Supplementary material for: Automatic Parking Controller with a Twin Artificial Neural Network Architecture
Source: Hindawi journal article supplement (doi:10.1155/2019/4801985), 2019-01-01
Supplement: f1 [file 4801985.f1.zip › data/data_213.txt]

6.800000 1.400000 0.000000 0.000000 0.000000 5.200000
6.796303 1.400000 -0.074999 0.000042 -0.029208 5.200000
6.785000 1.400000 -0.149998 0.000334 -0.067263 5.200000
6.766254 1.399986 -0.225003 0.001100 -0.105137 5.200000
6.739999 1.399939 -0.299997 0.002561 -0.143045 5.200000
6.706252 1.399814 -0.375001 0.004956 -0.180957 5.200000
6.665002 1.399541 -0.450005 0.008524 -0.218857 5.200000
6.616256 1.399001 -0.524998 0.013520 -0.256708 5.200000
6.560018 1.398061 -0.600004 0.020189 -0.294431 5.200000
6.496277 1.396505 -0.674997 0.028802 -0.331944 5.200000
6.425080 1.394080 -0.750002 0.039612 -0.369060 5.200000
6.346404 1.390445 -0.825002 0.052919 -0.403643 5.200000
6.260320 1.385208 -0.900000 0.068782 -0.429163 5.200000
6.166851 1.377912 -0.975000 0.087169 -0.453880 5.200000
6.066090 1.368053 -1.049999 0.108275 -0.478597 5.200000
5.958119 1.355018 -1.125003 0.132329 -0.503313 5.200000
5.843113 1.338135 -1.199997 0.159548 -0.528145 5.200000
5.721244 1.316625 -1.275001 0.189927 -0.541411 5.200000
5.592778 1.289786 -1.350005 0.221918 -0.530800 5.200000
5.457952 1.257031 -1.424998 0.254420 -0.509529 5.200000
5.317040 1.217920 -1.500004 0.286768 -0.482792 5.200000
5.170289 1.172064 -1.575004 0.318539 -0.453213 5.200000
5.017973 1.119181 -1.650002 0.349417 -0.422284 5.200000
4.860311 1.059009 -1.725003 0.379186 -0.390726 5.200000
4.697546 0.991422 -1.800000 0.407653 -0.358955 5.200000
4.529880 0.916252 -1.875001 0.434666 -0.327182 5.200000
4.357459 0.833482 -1.950779 0.460084 -0.295562 5.200000
4.180909 0.743321 -1.998917 0.483593 -0.260850 5.200000
4.004773 0.648455 -2.000000 0.504043 -0.221457 5.200000
3.830522 0.550288 -2.000000 0.521399 -0.186297 5.200000
3.657852 0.449378 -2.000000 0.536006 -0.154486 5.200000
3.486547 0.346156 -2.000000 0.548149 -0.125222 5.200000
3.316390 0.241053 -2.000000 0.558024 -0.098042 5.200000
3.147163 0.134464 -2.000000 0.565725 -0.067025 5.200000
2.978774 0.027089 -1.982040 0.568608 0.008932 5.200000
2.815057 -0.077177 -1.902965 0.564062 0.109891 5.200000
2.656877 -0.176062 -1.827959 0.552171 0.209891 5.200000
2.503615 -0.268636 -1.752967 0.533253 0.309888 5.200000
2.354847 -0.354018 -1.677961 0.507660 0.409887 5.200000
2.210277 -0.431557 -1.602960 0.475399 0.509893 5.200000
2.069723 -0.500606 -1.529171 0.436681 0.593400 5.200000
1.932987 -0.561098 -1.457679 0.396543 0.593400 5.200000
1.800974 -0.613457 -1.382687 0.358529 0.593400 5.200000
1.674192 -0.658377 -1.307683 0.322526 0.593400 5.200000
1.553060 -0.696576 -1.232678 0.288527 0.593400 5.200000
1.437966 -0.728750 -1.157683 0.256542 0.593400 5.200000
1.329195 -0.755543 -1.082681 0.226558 0.593400 5.200000
1.227031 -0.777598 -1.007679 0.198585 0.593400 5.200000
1.131683 -0.795497 -0.932684 0.172615 0.593400 5.200000
1.043322 -0.809814 -0.857679 0.148660 0.593400 5.200000
0.962086 -0.821074 -0.782685 0.126707 0.593400 5.200000
0.888069 -0.829751 -0.707682 0.106762 0.593400 5.200000
0.821372 -0.836293 -0.632681 0.088822 0.593400 5.200000
0.762057 -0.841098 -0.557685 0.072890 0.593400 5.200000
0.710152 -0.844528 -0.482680 0.058963 0.593400 5.200000
0.665693 -0.846882 -0.407687 0.047050 0.593400 5.200000
0.628699 -0.848441 -0.332683 0.037145 0.593400 5.200000
0.599200 -0.849422 -0.257683 0.029244 0.593400 5.200000
0.577197 -0.849998 -0.182682 0.023415 0.563048 5.200000
0.562698 -0.850321 -0.107682 0.020164 0.458069 5.200000
0.555628 -0.850459 -0.032679 0.018927 0.358068 5.200000
0.556181 -0.850444 0.042315 0.018962 0.258068 5.200000
0.564116 -0.850288 0.117320 0.019604 0.158069 5.200000
0.579628 -0.849986 0.195014 0.020236 0.054473 5.200000
0.600919 -0.849550 0.200397 0.020507 0.052814 5.200000
0.617129 -0.849209 0.124240 0.021165 0.154030 5.200000
0.625864 -0.849025 0.049235 0.021853 0.254032 5.200000
0.626958 -0.849000 -0.025762 0.021961 0.354034 5.200000
0.620660 -0.849134 -0.100762 0.020872 0.454036 5.200000
0.606805 -0.849400 -0.175766 0.017796 0.554022 5.200000
0.585353 -0.849726 -0.249635 0.012145 0.593400 5.200000
0.563164 -0.849926 -0.186441 0.006198 0.593400 5.200000
0.548289 -0.849989 -0.111444 0.002215 0.593400 5.200000
