# Supplementary material for: Automatic Parking Controller with a Twin Artificial Neural Network Architecture
Source: Hindawi journal article supplement (doi:10.1155/2019/4801985), 2019-01-01
Supplement: f1 [file 4801985.f1.zip › data/data_214.txt]

6.900000 1.400000 0.000000 0.000000 0.000000 5.200000
6.896308 1.400000 -0.075000 0.000040 -0.026900 5.200000
6.884997 1.400000 -0.149999 0.000323 -0.063181 5.200000
6.866261 1.399982 -0.224999 0.001048 -0.099206 5.200000
6.839997 1.399942 -0.299999 0.002445 -0.135188 5.200000
6.806254 1.399821 -0.375004 0.004726 -0.171087 5.200000
6.764992 1.399557 -0.449998 0.008123 -0.206835 5.200000
6.716262 1.399055 -0.525003 0.012861 -0.242359 5.200000
6.660003 1.398152 -0.599998 0.019174 -0.277538 5.200000
6.596283 1.396678 -0.675002 0.027290 -0.312192 5.200000
6.525057 1.394379 -0.749997 0.037445 -0.346569 5.200000
6.446393 1.390957 -0.825002 0.049813 -0.371830 5.200000
6.360277 1.386043 -0.899997 0.064365 -0.396545 5.200000
6.266785 1.379236 -0.975001 0.081273 -0.421257 5.200000
6.165945 1.370039 -1.049996 0.100750 -0.445982 5.200000
6.057879 1.357924 -1.125000 0.123000 -0.470806 5.200000
5.942692 1.342222 -1.200005 0.148205 -0.494122 5.200000
5.820579 1.322266 -1.274998 0.175865 -0.499270 5.200000
5.691698 1.297408 -1.350004 0.205169 -0.495232 5.200000
5.556312 1.267082 -1.424998 0.235471 -0.482796 5.200000
5.414645 1.230759 -1.500004 0.266192 -0.464227 5.200000
5.266970 1.188027 -1.574997 0.296869 -0.441747 5.200000
5.113515 1.138494 -1.650003 0.327149 -0.416817 5.200000
4.954549 1.081892 -1.724996 0.356738 -0.390531 5.200000
4.790310 1.017943 -1.800002 0.385443 -0.363554 5.200000
4.621035 0.946488 -1.875005 0.413076 -0.336349 5.200000
4.446913 0.867358 -1.951405 0.439526 -0.309466 5.200000
4.268580 0.780735 -1.999610 0.464443 -0.279365 5.200000
4.090764 0.689098 -2.000000 0.486623 -0.243104 5.200000
3.914918 0.593832 -2.000000 0.505979 -0.211543 5.200000
3.740822 0.495385 -2.000000 0.522868 -0.183528 5.200000
3.568303 0.394206 -2.000000 0.537585 -0.158265 5.200000
3.397191 0.290670 -2.000000 0.550349 -0.135113 5.200000
3.227314 0.185120 -2.000000 0.561311 -0.113651 5.200000
3.058305 0.077890 -1.997486 0.568152 -0.039293 5.200000
2.891972 -0.028325 -1.938550 0.567272 0.062450 5.200000
2.731268 -0.129889 -1.863543 0.558694 0.162445 5.200000
2.575745 -0.225560 -1.788538 0.543084 0.262453 5.200000
2.424880 -0.314460 -1.713544 0.520631 0.362449 5.200000
2.278345 -0.395791 -1.638539 0.491531 0.462445 5.200000
2.135952 -0.468894 -1.563131 0.455670 0.571454 5.200000
1.997299 -0.533459 -1.493607 0.415281 0.593400 5.200000
1.862980 -0.589585 -1.418263 0.376318 0.593400 5.200000
1.733658 -0.637943 -1.343261 0.339355 0.593400 5.200000
1.609793 -0.679248 -1.268260 0.304406 0.593400 5.200000
1.491795 -0.714197 -1.193262 0.271464 0.593400 5.200000
1.379990 -0.743460 -1.118257 0.240528 0.593400 5.200000
1.274659 -0.767686 -1.043265 0.211605 0.593400 5.200000
1.176055 -0.787483 -0.968260 0.184685 0.593400 5.200000
1.084358 -0.803438 -0.893262 0.159774 0.593400 5.200000
0.999732 -0.816077 -0.818263 0.136868 0.593400 5.200000
0.922277 -0.825926 -0.743259 0.115975 0.593400 5.200000
0.852094 -0.833433 -0.668266 0.097083 0.593400 5.200000
0.789273 -0.839010 -0.593261 0.080195 0.593400 5.200000
0.733849 -0.843053 -0.518264 0.065322 0.593400 5.200000
0.685858 -0.845877 -0.443264 0.052453 0.593400 5.200000
0.645324 -0.847790 -0.368261 0.041590 0.593400 5.200000
0.612257 -0.849015 -0.293267 0.032739 0.593400 5.200000
0.586698 -0.849766 -0.218263 0.025875 0.588702 5.200000
0.568639 -0.850192 -0.143258 0.021406 0.505513 5.200000
0.558081 -0.850408 -0.068265 0.019321 0.405513 5.200000
0.555048 -0.850470 0.006738 0.018841 0.305513 5.200000
0.559409 -0.850381 0.081739 0.019261 0.205511 5.200000
0.571316 -0.850148 0.156735 0.019979 0.105509 5.200000
0.590618 -0.849760 0.220026 0.020401 0.021675 5.200000
0.610369 -0.849356 0.159817 0.020808 0.106595 5.200000
0.622639 -0.849088 0.084814 0.021559 0.206595 5.200000
0.627202 -0.848994 0.009820 0.022001 0.306594 5.200000
0.624613 -0.849054 -0.065185 0.021590 0.406593 5.200000
0.614312 -0.849263 -0.140180 0.019554 0.506792 5.200000
0.596527 -0.849569 -0.215403 0.015124 0.593137 5.200000
0.572902 -0.849853 -0.224375 0.008805 0.593400 5.200000
0.554405 -0.849967 -0.147020 0.003854 0.593400 5.200000
