# Supplementary material for: Automatic Parking Controller with a Twin Artificial Neural Network Architecture
Source: Hindawi journal article supplement (doi:10.1155/2019/4801985), 2019-01-01
Supplement: f1 [file 4801985.f1.zip › data/data_215.txt]

7.000000 1.400000 0.000000 0.000000 0.000000 5.200000
6.996316 1.400000 -0.075000 0.000038 -0.024423 5.200000
6.984982 1.400000 -0.150002 0.000313 -0.058825 5.200000
6.966261 1.399983 -0.224997 0.000998 -0.092894 5.200000
6.939991 1.399945 -0.300002 0.002325 -0.126857 5.200000
6.906259 1.399832 -0.374998 0.004480 -0.160642 5.200000
6.864991 1.399581 -0.450003 0.007695 -0.194177 5.200000
6.816261 1.399098 -0.525000 0.012163 -0.227346 5.200000
6.760000 1.398255 -0.600004 0.018101 -0.259987 5.200000
6.696279 1.396868 -0.675002 0.025712 -0.291791 5.200000
6.625052 1.394698 -0.749997 0.035180 -0.318199 5.200000
6.546381 1.391489 -0.825004 0.046529 -0.342857 5.200000
6.460243 1.386911 -0.899999 0.059932 -0.367569 5.200000
6.366710 1.380580 -0.975005 0.075568 -0.392295 5.200000
6.265823 1.372034 -1.050001 0.093636 -0.417009 5.200000
6.157658 1.360767 -1.124997 0.114326 -0.441515 5.200000
6.042333 1.346168 -1.200003 0.137546 -0.456328 5.200000
5.919972 1.327662 -1.274998 0.162839 -0.462667 5.200000
5.790765 1.304635 -1.350005 0.189821 -0.462364 5.200000
5.654898 1.276527 -1.424999 0.218056 -0.455458 5.200000
5.512589 1.242824 -1.500006 0.247059 -0.443263 5.200000
5.364083 1.203018 -1.575001 0.276444 -0.426928 5.200000
5.209635 1.156716 -1.650000 0.305847 -0.407787 5.200000
5.049486 1.103535 -1.725003 0.334997 -0.386817 5.200000
4.883894 1.043199 -1.800001 0.363650 -0.364826 5.200000
4.713108 0.975410 -1.875004 0.391645 -0.342397 5.200000
4.537348 0.899988 -1.951637 0.418847 -0.320098 5.200000
4.357311 0.816949 -1.996101 0.444969 -0.294128 5.200000
4.177821 0.728681 -2.000000 0.468674 -0.262155 5.200000
4.000374 0.636420 -2.000000 0.489837 -0.234336 5.200000
3.824805 0.540622 -2.000000 0.508830 -0.210105 5.200000
3.651007 0.441672 -2.000000 0.525948 -0.188778 5.200000
3.478832 0.339905 -2.000000 0.541430 -0.169884 5.200000
3.308177 0.235612 -2.000000 0.555443 -0.150197 5.200000
3.138842 0.129197 -2.000000 0.565806 -0.085366 5.200000
2.970697 0.021918 -1.980620 0.568343 0.014765 5.200000
2.807208 -0.082134 -1.899302 0.563639 0.114770 5.200000
2.649283 -0.180736 -1.824302 0.551403 0.214770 5.200000
2.496252 -0.272977 -1.749301 0.532154 0.314768 5.200000
2.347694 -0.357998 -1.674305 0.506239 0.414773 5.200000
2.203327 -0.435128 -1.599300 0.473654 0.514768 5.200000
2.062949 -0.503760 -1.525989 0.434683 0.593400 5.200000
1.926432 -0.563835 -1.454020 0.394642 0.593400 5.200000
1.794663 -0.615815 -1.379027 0.356725 0.593400 5.200000
1.668146 -0.660393 -1.304023 0.320820 0.593400 5.200000
1.547300 -0.698282 -1.229018 0.286919 0.593400 5.200000
1.432509 -0.730177 -1.154023 0.255032 0.593400 5.200000
1.324056 -0.756722 -1.079021 0.225147 0.593400 5.200000
1.222218 -0.778563 -1.004018 0.197271 0.593400 5.200000
1.127207 -0.796276 -0.929024 0.171398 0.593400 5.200000
1.039191 -0.810430 -0.854019 0.147541 0.593400 5.200000
0.958306 -0.821553 -0.779025 0.125687 0.593400 5.200000
0.884646 -0.830116 -0.704022 0.105841 0.593400 5.200000
0.818305 -0.836565 -0.629020 0.087997 0.593400 5.200000
0.759350 -0.841295 -0.554026 0.072164 0.593400 5.200000
0.707809 -0.844665 -0.479020 0.058335 0.593400 5.200000
0.663718 -0.846975 -0.404027 0.046520 0.593400 5.200000
0.627088 -0.848500 -0.329024 0.036714 0.593400 5.200000
0.597950 -0.849459 -0.254023 0.028910 0.593400 5.200000
0.576309 -0.850018 -0.179021 0.023196 0.557674 5.200000
0.562179 -0.850331 -0.104023 0.020064 0.453189 5.200000
0.555543 -0.850461 -0.029018 0.018914 0.353188 5.200000
0.556401 -0.850440 0.045975 0.018985 0.253188 5.200000
0.564707 -0.850276 0.120979 0.019640 0.153189 5.200000
0.580596 -0.849966 0.199885 0.020255 0.047978 5.200000
0.601874 -0.849531 0.197484 0.020526 0.056914 5.200000
0.617716 -0.849196 0.120580 0.021202 0.158910 5.200000
0.626101 -0.849020 0.045576 0.021877 0.258911 5.200000
0.626803 -0.849004 -0.029423 0.021938 0.358914 5.200000
0.620158 -0.849144 -0.104421 0.020774 0.458916 5.200000
0.605948 -0.849415 -0.179455 0.017585 0.558232 5.200000
0.584172 -0.849740 -0.251360 0.011829 0.593400 5.200000
0.562258 -0.849931 -0.182780 0.005956 0.593400 5.200000
0.547744 -0.849991 -0.107784 0.002069 0.593400 5.200000
