# Supplementary material for: Automatic Parking Controller with a Twin Artificial Neural Network Architecture
Source: Hindawi journal article supplement (doi:10.1155/2019/4801985), 2019-01-01
Supplement: f1 [file 4801985.f1.zip › data/data_216.txt]

7.100000 1.400000 0.000000 0.000000 0.000000 5.200000
7.096321 1.400000 -0.074998 0.000037 -0.021910 5.200000
7.084984 1.400000 -0.149996 0.000294 -0.054409 5.200000
7.066269 1.399984 -0.225005 0.000949 -0.086510 5.200000
7.039983 1.399947 -0.300002 0.002201 -0.118455 5.200000
7.006266 1.399842 -0.375000 0.004237 -0.150145 5.200000
6.964995 1.399604 -0.449998 0.007272 -0.181509 5.200000
6.916264 1.399149 -0.524997 0.011463 -0.212409 5.200000
6.860004 1.398353 -0.600004 0.017045 -0.242483 5.200000
6.796281 1.397045 -0.675002 0.024133 -0.268056 5.200000
6.725050 1.395018 -0.750000 0.032839 -0.292772 5.200000
6.646362 1.392034 -0.824998 0.043314 -0.317490 5.200000
6.560214 1.387772 -0.900000 0.055722 -0.342209 5.200000
6.466647 1.381874 -0.975004 0.070271 -0.366927 5.200000
6.365717 1.373930 -1.050002 0.087132 -0.391434 5.200000
6.257469 1.363440 -1.125000 0.106336 -0.409819 5.200000
6.142023 1.349887 -1.199998 0.127640 -0.422023 5.200000
6.019465 1.332709 -1.275004 0.150894 -0.429427 5.200000
5.889966 1.311370 -1.350004 0.175808 -0.431412 5.200000
5.753687 1.285302 -1.425002 0.202091 -0.428444 5.200000
5.610839 1.253999 -1.500000 0.229375 -0.420911 5.200000
5.461623 1.216937 -1.574997 0.257332 -0.409668 5.200000
5.306285 1.173684 -1.650006 0.285661 -0.395641 5.200000
5.145077 1.123820 -1.725004 0.314088 -0.379700 5.200000
4.978252 1.066984 -1.800002 0.342419 -0.362594 5.200000
4.806070 1.002847 -1.875000 0.370479 -0.344974 5.200000
4.628772 0.931107 -1.950831 0.398173 -0.327604 5.200000
4.447136 0.851783 -2.000000 0.425183 -0.306784 5.200000
4.265943 0.766935 -2.000000 0.450174 -0.278289 5.200000
4.086892 0.677845 -2.000000 0.472922 -0.254285 5.200000
3.909820 0.584868 -2.000000 0.493804 -0.233936 5.200000
3.734651 0.488351 -2.000000 0.513135 -0.216599 5.200000
3.561309 0.388589 -2.000000 0.531128 -0.201736 5.200000
3.389732 0.285818 -2.000000 0.548073 -0.190494 5.200000
3.219795 0.180380 -2.000000 0.561625 -0.126080 5.200000
3.050888 0.073150 -1.996761 0.568379 -0.033205 5.200000
2.884719 -0.032941 -1.935904 0.567148 0.066890 5.200000
2.724260 -0.134271 -1.860214 0.558117 0.166891 5.200000
2.568944 -0.229653 -1.785216 0.542244 0.266887 5.200000
2.418289 -0.318239 -1.710210 0.519471 0.366887 5.200000
2.271937 -0.399219 -1.635210 0.490099 0.466890 5.200000
2.129727 -0.471942 -1.559751 0.453907 0.576900 5.200000
1.991237 -0.536126 -1.490304 0.413508 0.593400 5.200000
1.857130 -0.591890 -1.414933 0.374634 0.593400 5.200000
1.728040 -0.639921 -1.339930 0.337761 0.593400 5.200000
1.604425 -0.680930 -1.264929 0.302901 0.593400 5.200000
1.486696 -0.715613 -1.189933 0.270049 0.593400 5.200000
1.375175 -0.744637 -1.114928 0.239202 0.593400 5.200000
1.270138 -0.768653 -1.039934 0.210368 0.593400 5.200000
1.171836 -0.788269 -0.964931 0.183536 0.593400 5.200000
1.080448 -0.804067 -0.889931 0.158715 0.593400 5.200000
0.996139 -0.816571 -0.814934 0.135897 0.593400 5.200000
0.919007 -0.826305 -0.739929 0.115094 0.593400 5.200000
0.849149 -0.833719 -0.664936 0.096291 0.593400 5.200000
0.786653 -0.839220 -0.589932 0.079491 0.593400 5.200000
0.731557 -0.843203 -0.514933 0.064707 0.593400 5.200000
0.683900 -0.845979 -0.439935 0.051928 0.593400 5.200000
0.643702 -0.847857 -0.364930 0.041155 0.593400 5.200000
0.610963 -0.849057 -0.289938 0.032392 0.593400 5.200000
0.585733 -0.849791 -0.214933 0.025614 0.587392 5.200000
0.568004 -0.850207 -0.139929 0.021266 0.501072 5.200000
0.557783 -0.850414 -0.064934 0.019272 0.401073 5.200000
0.555041 -0.850470 0.010068 0.018840 0.301073 5.200000
0.559789 -0.850374 0.085070 0.019293 0.201071 5.200000
0.572026 -0.850135 0.160065 0.020009 0.101069 5.200000
0.591613 -0.849740 0.218899 0.020410 0.023555 5.200000
0.611064 -0.849341 0.156487 0.020838 0.111035 5.200000
0.623000 -0.849080 0.081484 0.021589 0.211035 5.200000
0.627255 -0.848993 0.006490 0.022007 0.311035 5.200000
0.624304 -0.849060 -0.068515 0.021537 0.411034 5.200000
0.613684 -0.849275 -0.143510 0.019414 0.511445 5.200000
0.595573 -0.849583 -0.218448 0.014873 0.593400 5.200000
0.571902 -0.849861 -0.220030 0.008537 0.593400 5.200000
0.553754 -0.849970 -0.143690 0.003680 0.593400 5.200000
