# Supplementary material for: Automatic Parking Controller with a Twin Artificial Neural Network Architecture
Source: Hindawi journal article supplement (doi:10.1155/2019/4801985), 2019-01-01
Supplement: f1 [file 4801985.f1.zip › data/data_217.txt]

7.200000 1.400000 0.000000 0.000000 0.000000 5.200000
7.196323 1.400000 -0.074999 0.000035 -0.019430 5.200000
7.184975 1.400000 -0.149997 0.000285 -0.050088 5.200000
7.166275 1.399985 -0.224996 0.000893 -0.080278 5.200000
7.139986 1.399949 -0.300003 0.002083 -0.110276 5.200000
7.106260 1.399851 -0.375004 0.004006 -0.139962 5.200000
7.065000 1.399626 -0.450002 0.006851 -0.169334 5.200000
7.016257 1.399196 -0.525001 0.010801 -0.197378 5.200000
6.960008 1.398449 -0.600000 0.015982 -0.222065 5.200000
6.896269 1.397228 -0.674999 0.022515 -0.246785 5.200000
6.825049 1.395343 -0.749997 0.030576 -0.271507 5.200000
6.746335 1.392556 -0.824996 0.040322 -0.296229 5.200000
6.660188 1.388590 -0.900006 0.051919 -0.320960 5.200000
6.566597 1.383094 -0.975004 0.065571 -0.345411 5.200000
6.465624 1.375686 -1.050002 0.081283 -0.364392 5.200000
6.357310 1.365900 -1.125001 0.098997 -0.379789 5.200000
6.241754 1.353280 -1.200000 0.118646 -0.391569 5.200000
6.119040 1.337326 -1.274999 0.140114 -0.399397 5.200000
5.989289 1.317494 -1.349997 0.163215 -0.403132 5.200000
5.852685 1.293284 -1.424996 0.187705 -0.402746 5.200000
5.709359 1.264149 -1.500003 0.213336 -0.398489 5.200000
5.559555 1.229607 -1.575004 0.239842 -0.391182 5.200000
5.403451 1.189173 -1.650002 0.266961 -0.381335 5.200000
5.241325 1.142415 -1.725001 0.294487 -0.369696 5.200000
5.073391 1.088914 -1.800000 0.322226 -0.356937 5.200000
4.899931 1.028286 -1.874999 0.350047 -0.343691 5.200000
4.721199 0.960188 -1.953475 0.377887 -0.330831 5.200000
4.537897 0.884443 -1.988242 0.405452 -0.313714 5.200000
4.355222 0.803194 -2.000000 0.431295 -0.289737 5.200000
4.174569 0.717388 -2.000000 0.455226 -0.269423 5.200000
3.995947 0.627438 -2.000000 0.477606 -0.252729 5.200000
3.819318 0.533612 -2.000000 0.498722 -0.239092 5.200000
3.644662 0.436183 -2.000000 0.518816 -0.228161 5.200000
3.471945 0.335337 -2.000000 0.538234 -0.220582 5.200000
3.301165 0.231257 -2.000000 0.555666 -0.176064 5.200000
3.131845 0.124751 -1.999896 0.566115 -0.081360 5.200000
2.963745 0.017465 -1.970957 0.568218 0.018927 5.200000
2.800532 -0.086343 -1.896187 0.563352 0.118931 5.200000
2.642828 -0.184709 -1.821181 0.550718 0.218931 5.200000
2.489983 -0.276647 -1.746179 0.531227 0.318928 5.200000
2.341607 -0.361370 -1.671180 0.505018 0.418931 5.200000
2.197414 -0.438153 -1.596182 0.472154 0.518934 5.200000
2.057181 -0.506433 -1.523295 0.432976 0.593400 5.200000
1.920852 -0.566154 -1.450900 0.393025 0.593400 5.200000
1.789293 -0.617810 -1.375906 0.355191 0.593400 5.200000
1.663003 -0.662098 -1.300903 0.319370 0.593400 5.200000
1.542401 -0.699725 -1.225899 0.285551 0.593400 5.200000
1.427868 -0.731384 -1.150902 0.253748 0.593400 5.200000
1.319687 -0.757720 -1.075902 0.223947 0.593400 5.200000
1.218130 -0.779377 -1.000898 0.196155 0.593400 5.200000
1.123404 -0.796933 -0.925905 0.170365 0.593400 5.200000
1.035682 -0.810949 -0.850900 0.146591 0.593400 5.200000
0.955097 -0.821958 -0.775904 0.124822 0.593400 5.200000
0.881742 -0.830423 -0.700903 0.105059 0.593400 5.200000
0.815706 -0.836793 -0.625900 0.087298 0.593400 5.200000
0.757056 -0.841460 -0.550906 0.071549 0.593400 5.200000
0.705824 -0.844779 -0.475901 0.057803 0.593400 5.200000
0.662046 -0.847053 -0.400906 0.046072 0.593400 5.200000
0.625730 -0.848549 -0.325904 0.036350 0.593400 5.200000
0.596899 -0.849489 -0.250902 0.028629 0.593400 5.200000
0.575566 -0.850035 -0.175901 0.023014 0.552852 5.200000
0.561746 -0.850339 -0.100903 0.019982 0.449030 5.200000
0.555478 -0.850462 -0.025898 0.018905 0.349028 5.200000
0.556591 -0.850436 0.049094 0.019004 0.249028 5.200000
0.565224 -0.850266 0.124099 0.019672 0.149028 5.200000
0.581435 -0.849949 0.203959 0.020272 0.042547 5.200000
0.602679 -0.849514 0.194714 0.020545 0.060709 5.200000
0.618197 -0.849186 0.117460 0.021233 0.163070 5.200000
0.626277 -0.849017 0.042456 0.021895 0.263071 5.200000
0.626658 -0.849008 -0.032544 0.021917 0.363073 5.200000
0.619712 -0.849154 -0.107541 0.020685 0.463075 5.200000
0.605199 -0.849428 -0.182636 0.017397 0.562029 5.200000
0.583178 -0.849752 -0.252191 0.011562 0.593400 5.200000
0.561502 -0.849936 -0.179660 0.005754 0.593400 5.200000
0.547292 -0.849993 -0.104664 0.001948 0.593400 5.200000
