# Supplementary material for: Automatic Parking Controller with a Twin Artificial Neural Network Architecture
Source: Hindawi journal article supplement (doi:10.1155/2019/4801985), 2019-01-01
Supplement: f1 [file 4801985.f1.zip › data/data_218.txt]

6.500000 1.500000 0.000000 0.000000 0.000000 5.200000
6.496280 1.500000 -0.074999 0.000062 -0.043908 5.200000
6.485023 1.500000 -0.149999 0.000429 -0.093955 5.200000
6.466239 1.499978 -0.225004 0.001420 -0.144643 5.200000
6.440016 1.499918 -0.299997 0.003341 -0.196511 5.200000
6.406241 1.499750 -0.375003 0.006547 -0.250151 5.200000
6.365006 1.499384 -0.449996 0.011407 -0.306580 5.200000
6.316251 1.498666 -0.525002 0.018388 -0.367609 5.200000
6.260028 1.497371 -0.599995 0.028082 -0.438059 5.200000
6.196310 1.495169 -0.675000 0.041414 -0.526419 5.200000
6.125151 1.491601 -0.749999 0.058979 -0.551511 5.200000
6.046600 1.486164 -0.824999 0.079476 -0.575098 5.200000
5.960695 1.478330 -0.899997 0.102381 -0.575085 5.200000
5.867574 1.467600 -0.974998 0.127255 -0.574960 5.200000
5.767321 1.453394 -1.050003 0.154136 -0.574920 5.200000
5.660126 1.435160 -1.124996 0.182999 -0.575190 5.200000
5.546152 1.412235 -1.200002 0.213855 -0.575422 5.200000
5.425682 1.383997 -1.274995 0.246697 -0.574915 5.200000
5.298986 1.349733 -1.350001 0.281519 -0.574072 5.200000
5.166435 1.308750 -1.424994 0.318353 -0.574897 5.200000
5.028459 1.260294 -1.499999 0.357206 -0.577357 5.200000
4.885543 1.203609 -1.574998 0.398096 -0.576513 5.200000
4.738253 1.138023 -1.649998 0.439068 -0.530736 5.200000
4.586900 1.063412 -1.724995 0.475547 -0.452483 5.200000
4.431550 0.980198 -1.799997 0.506858 -0.375736 5.200000
4.272157 0.888768 -1.875002 0.533573 -0.311058 5.200000
4.108629 0.789572 -1.952644 0.556199 -0.251116 5.200000
3.941203 0.683220 -1.989480 0.574591 -0.189706 5.200000
3.774170 0.573381 -2.000000 0.587941 -0.127055 5.200000
3.608274 0.461672 -2.000000 0.596442 -0.068728 5.200000
3.443074 0.348927 -2.000000 0.600479 -0.014586 5.200000
3.278055 0.235928 -2.000000 0.599641 0.033155 5.200000
3.112645 0.123432 -2.000000 0.593930 0.089995 5.200000
2.947249 0.012875 -1.962699 0.583825 0.144581 5.200000
2.786042 -0.092107 -1.886069 0.569835 0.195776 5.200000
2.629576 -0.190537 -1.811067 0.552563 0.245236 5.200000
2.477702 -0.282134 -1.736069 0.531883 0.326969 5.200000
2.330232 -0.366406 -1.661064 0.505206 0.427230 5.200000
2.186929 -0.442704 -1.586070 0.471885 0.527226 5.200000
2.047541 -0.510495 -1.514325 0.432368 0.593400 5.200000
1.912130 -0.569751 -1.440689 0.392748 0.593400 5.200000
1.781514 -0.621009 -1.365690 0.355192 0.593400 5.200000
1.656195 -0.664973 -1.290691 0.319647 0.593400 5.200000
1.536582 -0.702353 -1.215692 0.286103 0.593400 5.200000
1.423048 -0.733815 -1.140693 0.254570 0.593400 5.200000
1.315888 -0.760019 -1.065688 0.225043 0.593400 5.200000
1.215365 -0.781578 -0.990685 0.197524 0.593400 5.200000
1.121666 -0.799092 -0.915686 0.172005 0.593400 5.200000
1.034972 -0.813101 -0.840687 0.148505 0.593400 5.200000
0.955421 -0.824134 -0.765688 0.127003 0.593400 5.200000
0.883100 -0.832650 -0.690689 0.107515 0.593400 5.200000
0.818101 -0.839096 -0.615690 0.090033 0.593400 5.200000
0.760477 -0.843845 -0.540691 0.074558 0.593400 5.200000
0.710277 -0.847256 -0.465692 0.061089 0.593400 5.200000
0.667530 -0.849627 -0.390690 0.049717 0.569937 5.200000
0.632245 -0.851238 -0.315684 0.041721 0.465361 5.200000
0.604455 -0.852322 -0.240685 0.036820 0.365363 5.200000
0.584142 -0.853041 -0.165686 0.034153 0.265364 5.200000
0.571339 -0.853473 -0.090687 0.033021 0.165365 5.200000
0.566131 -0.853643 -0.015688 0.032747 0.065367 5.200000
0.568157 -0.853575 0.059311 0.032737 -0.034632 5.200000
0.577849 -0.853259 0.134310 0.032381 -0.134632 5.200000
0.595036 -0.852711 0.209309 0.031082 -0.234639 5.200000
0.619706 -0.851980 0.284309 0.028189 -0.334638 5.200000
0.651844 -0.851150 0.356342 0.022988 -0.434637 5.200000
0.685603 -0.850488 0.301654 0.015956 -0.534721 5.200000
0.712015 -0.850157 0.226655 0.009166 -0.592392 5.200000
0.730929 -0.850030 0.151656 0.004102 -0.593400 5.200000
0.742358 -0.850000 0.076656 0.001049 -0.593400 5.200000
