# Supplementary material for: Automatic Parking Controller with a Twin Artificial Neural Network Architecture
Source: Hindawi journal article supplement (doi:10.1155/2019/4801985), 2019-01-01
Supplement: f1 [file 4801985.f1.zip › data/data_219.txt]

6.600000 1.500000 0.000000 0.000000 0.000000 5.200000
6.596294 1.500000 -0.074997 0.000060 -0.038920 5.200000
6.585017 1.500000 -0.150005 0.000394 -0.084829 5.200000
6.566245 1.499980 -0.225002 0.001311 -0.131027 5.200000
6.540011 1.499923 -0.299999 0.003066 -0.177855 5.200000
6.506243 1.499774 -0.374996 0.005992 -0.225594 5.200000
6.465010 1.499441 -0.450005 0.010380 -0.274650 5.200000
6.416247 1.498785 -0.525001 0.016625 -0.325642 5.200000
6.360028 1.497625 -0.599999 0.025110 -0.379812 5.200000
6.296294 1.495667 -0.674995 0.036385 -0.439412 5.200000
6.225122 1.492568 -0.750004 0.051202 -0.508526 5.200000
6.146509 1.487808 -0.825000 0.070032 -0.540787 5.200000
6.060551 1.480841 -0.899998 0.092009 -0.567025 5.200000
5.967303 1.471070 -0.974995 0.116821 -0.574653 5.200000
5.866924 1.457922 -1.050003 0.143693 -0.574815 5.200000
5.759527 1.440804 -1.125000 0.172555 -0.575270 5.200000
5.645335 1.419078 -1.199996 0.203409 -0.575018 5.200000
5.524566 1.392103 -1.275005 0.236238 -0.573861 5.200000
5.397523 1.359155 -1.350002 0.271075 -0.574105 5.200000
5.264551 1.319568 -1.424999 0.307926 -0.576874 5.200000
5.126072 1.272545 -1.499996 0.346769 -0.577223 5.200000
4.982577 1.217387 -1.575004 0.386898 -0.556486 5.200000
4.834435 1.153698 -1.650001 0.423688 -0.474687 5.200000
4.681794 1.081782 -1.724998 0.456098 -0.411261 5.200000
4.524737 1.001787 -1.799995 0.485091 -0.356385 5.200000
4.363345 0.913973 -1.875004 0.510881 -0.304486 5.200000
4.197624 0.818512 -1.950217 0.533445 -0.253955 5.200000
4.027961 0.716046 -2.000000 0.552488 -0.201446 5.200000
3.858465 0.609710 -2.000000 0.567185 -0.146183 5.200000
3.690382 0.501325 -2.000000 0.577592 -0.095252 5.200000
3.523221 0.391520 -2.000000 0.584036 -0.046937 5.200000
3.356560 0.280960 -2.000000 0.586617 -0.006066 5.200000
3.189950 0.170311 -2.000000 0.585104 0.034403 5.200000
3.022966 0.060268 -1.988660 0.579523 0.081042 5.200000
2.858736 -0.046234 -1.919941 0.570526 0.123444 5.200000
2.699738 -0.147021 -1.844944 0.558705 0.181978 5.200000
2.545743 -0.241616 -1.769947 0.541798 0.282063 5.200000
2.396314 -0.329294 -1.694950 0.518076 0.382057 5.200000
2.251152 -0.409258 -1.619941 0.487764 0.482058 5.200000
2.110096 -0.480905 -1.544554 0.450682 0.589798 5.200000
1.972730 -0.544020 -1.474680 0.410374 0.593400 5.200000
1.839890 -0.598803 -1.399567 0.371908 0.593400 5.200000
1.712116 -0.645972 -1.324568 0.335454 0.593400 5.200000
1.589880 -0.686240 -1.249569 0.301004 0.593400 5.200000
1.473558 -0.720298 -1.174570 0.268563 0.593400 5.200000
1.363486 -0.748792 -1.099572 0.238134 0.593400 5.200000
1.259936 -0.772374 -1.024561 0.209705 0.593400 5.200000
1.163129 -0.791647 -0.949563 0.183282 0.593400 5.200000
1.073256 -0.807176 -0.874564 0.158874 0.593400 5.200000
0.990460 -0.819490 -0.799565 0.136463 0.593400 5.200000
0.914864 -0.829085 -0.724566 0.116072 0.593400 5.200000
0.846549 -0.836415 -0.649567 0.097680 0.593400 5.200000
0.785592 -0.841885 -0.574568 0.081301 0.593400 5.200000
0.732029 -0.845862 -0.499569 0.066922 0.593400 5.200000
0.685912 -0.848664 -0.424570 0.054531 0.590761 5.200000
0.647254 -0.850587 -0.349560 0.044891 0.510537 5.200000
0.616074 -0.851886 -0.274562 0.038712 0.410532 5.200000
0.592387 -0.852757 -0.199563 0.035124 0.310534 5.200000
0.576191 -0.853312 -0.124564 0.033385 0.210535 5.200000
0.567474 -0.853597 -0.049565 0.032802 0.110536 5.200000
0.566184 -0.853643 0.025434 0.032740 0.010538 5.200000
0.572544 -0.853431 0.100433 0.032621 -0.089461 5.200000
0.586339 -0.852986 0.175432 0.031826 -0.189471 5.200000
0.607632 -0.852333 0.250431 0.029735 -0.289469 5.200000
0.636427 -0.851532 0.326473 0.025672 -0.389467 5.200000
0.671199 -0.850747 0.337387 0.019165 -0.489466 5.200000
0.701010 -0.850278 0.260532 0.012115 -0.584735 5.200000
0.723308 -0.850073 0.185533 0.006140 -0.593400 5.200000
0.738107 -0.850009 0.110534 0.002180 -0.593400 5.200000
