# Supplementary material for: Automatic Parking Controller with a Twin Artificial Neural Network Architecture
Source: Hindawi journal article supplement (doi:10.1155/2019/4801985), 2019-01-01
Supplement: f1 [file 4801985.f1.zip › data/data_220.txt]

6.700000 1.500000 0.000000 0.000000 0.000000 5.200000
6.696299 1.500000 -0.074999 0.000046 -0.035007 5.200000
6.685008 1.500000 -0.149998 0.000371 -0.077746 5.200000
6.666249 1.499981 -0.225002 0.001227 -0.120549 5.200000
6.640008 1.499927 -0.299995 0.002859 -0.163677 5.200000
6.606247 1.499793 -0.374999 0.005570 -0.207240 5.200000
6.565008 1.499483 -0.450003 0.009625 -0.251412 5.200000
6.516252 1.498880 -0.524995 0.015332 -0.296383 5.200000
6.460021 1.497805 -0.600000 0.023036 -0.342516 5.200000
6.396290 1.496020 -0.675001 0.033107 -0.390407 5.200000
6.325098 1.493220 -0.749999 0.045988 -0.441333 5.200000
6.246458 1.488970 -0.825002 0.062252 -0.499755 5.200000
6.160440 1.482753 -0.899996 0.082397 -0.529248 5.200000
6.067100 1.473964 -0.974998 0.105667 -0.553971 5.200000
5.966576 1.461972 -1.050003 0.132151 -0.574869 5.200000
5.858990 1.446078 -1.124995 0.161025 -0.575069 5.200000
5.744553 1.425686 -1.200000 0.191864 -0.574107 5.200000
5.623478 1.400090 -1.275002 0.224699 -0.573471 5.200000
5.496066 1.368632 -1.349997 0.259542 -0.575638 5.200000
5.362642 1.330561 -1.425000 0.296391 -0.577482 5.200000
5.223635 1.285158 -1.499998 0.334736 -0.560519 5.200000
5.079383 1.231952 -1.574999 0.370863 -0.494549 5.200000
4.930123 1.170987 -1.649996 0.403985 -0.442192 5.200000
4.776021 1.102229 -1.724996 0.434584 -0.394891 5.200000
4.617243 1.025736 -1.800001 0.462734 -0.349846 5.200000
4.453914 0.941550 -1.874993 0.488400 -0.305965 5.200000
4.286089 0.849810 -1.953166 0.511445 -0.262742 5.200000
4.114146 0.750942 -1.989476 0.531579 -0.216545 5.200000
3.942689 0.648147 -2.000000 0.547815 -0.167435 5.200000
3.772641 0.542864 -2.000000 0.560231 -0.122344 5.200000
3.603720 0.435784 -2.000000 0.569152 -0.080104 5.200000
3.435583 0.327480 -2.000000 0.574769 -0.039633 5.200000
3.267884 0.218495 -2.000000 0.577148 -0.005982 5.200000
3.100260 0.109406 -1.999963 0.576038 0.024609 5.200000
2.933497 0.001556 -1.956794 0.571515 0.058240 5.200000
2.771912 -0.101609 -1.879288 0.564171 0.136194 5.200000
2.615664 -0.199114 -1.804285 0.550393 0.236272 5.200000
2.464194 -0.290047 -1.729291 0.529773 0.336268 5.200000
2.317110 -0.373645 -1.654288 0.502458 0.436272 5.200000
2.174177 -0.449173 -1.579232 0.468535 0.537294 5.200000
2.035115 -0.516200 -1.508398 0.428671 0.593400 5.200000
1.900118 -0.574703 -1.433909 0.389270 0.593400 5.200000
1.769958 -0.625273 -1.358910 0.351895 0.593400 5.200000
1.645141 -0.668614 -1.283911 0.316532 0.593400 5.200000
1.526062 -0.705432 -1.208912 0.283170 0.593400 5.200000
1.413094 -0.736390 -1.133913 0.251819 0.593400 5.200000
1.306523 -0.762152 -1.058906 0.222472 0.593400 5.200000
1.206609 -0.783322 -0.983905 0.195135 0.593400 5.200000
1.113537 -0.800497 -0.908906 0.169797 0.593400 5.200000
1.027483 -0.814214 -0.833907 0.146477 0.593400 5.200000
0.948583 -0.825000 -0.758908 0.125159 0.593400 5.200000
0.876921 -0.833312 -0.683909 0.105851 0.593400 5.200000
0.812587 -0.839589 -0.608910 0.088550 0.593400 5.200000
0.755630 -0.844203 -0.533911 0.073255 0.593400 5.200000
0.706101 -0.847508 -0.458912 0.059968 0.593400 5.200000
0.664028 -0.849800 -0.383908 0.048841 0.560263 5.200000
0.629419 -0.851355 -0.308904 0.041164 0.456321 5.200000
0.602306 -0.852402 -0.233905 0.036495 0.356323 5.200000
0.582668 -0.853092 -0.158906 0.033996 0.256324 5.200000
0.570534 -0.853499 -0.083907 0.032968 0.156326 5.200000
0.566078 -0.853646 -0.008908 0.032744 0.056327 5.200000
0.568724 -0.853556 0.066091 0.032727 -0.043672 5.200000
0.579093 -0.853219 0.141090 0.032312 -0.143673 5.200000
0.596957 -0.852652 0.216089 0.030896 -0.243679 5.200000
0.622304 -0.851908 0.291091 0.027826 -0.343678 5.200000
0.655057 -0.851078 0.355105 0.022389 -0.443676 5.200000
0.688296 -0.850447 0.294874 0.015315 -0.545073 5.200000
0.714027 -0.850140 0.219875 0.008627 -0.592705 5.200000
0.732259 -0.850025 0.144876 0.003746 -0.593400 5.200000
