# Supplementary material for: Automatic Parking Controller with a Twin Artificial Neural Network Architecture
Source: Hindawi journal article supplement (doi:10.1155/2019/4801985), 2019-01-01
Supplement: f1 [file 4801985.f1.zip › data/data_221.txt]

6.800000 1.500000 0.000000 0.000000 0.000000 5.200000
6.796301 1.500000 -0.075001 0.000044 -0.032159 5.200000
6.784995 1.500000 -0.150002 0.000359 -0.072641 5.200000
6.766256 1.499982 -0.224998 0.001166 -0.113063 5.200000
6.740002 1.499930 -0.300004 0.002723 -0.153641 5.200000
6.706249 1.499800 -0.375000 0.005276 -0.194423 5.200000
6.665000 1.499512 -0.449996 0.009097 -0.235439 5.200000
6.616257 1.498933 -0.525003 0.014450 -0.276762 5.200000
6.560009 1.497929 -0.599999 0.021644 -0.318454 5.200000
6.496290 1.496258 -0.674999 0.030976 -0.360631 5.200000
6.425088 1.493637 -0.750001 0.042788 -0.403491 5.200000
6.346435 1.489708 -0.824996 0.057451 -0.448105 5.200000
6.260378 1.483999 -0.900003 0.075380 -0.486163 5.200000
6.166970 1.475961 -0.974999 0.096497 -0.510921 5.200000
6.066314 1.465010 -1.049995 0.120623 -0.535645 5.200000
5.958550 1.450459 -1.125002 0.148035 -0.561364 5.200000
5.843851 1.431570 -1.199997 0.178617 -0.574342 5.200000
5.722450 1.407592 -1.274998 0.211443 -0.574390 5.200000
5.594629 1.377814 -1.349999 0.246281 -0.574510 5.200000
5.460719 1.341538 -1.425000 0.282656 -0.561489 5.200000
5.321030 1.298229 -1.500001 0.317876 -0.511548 5.200000
5.175827 1.247705 -1.574997 0.351268 -0.468937 5.200000
5.025351 1.189786 -1.650003 0.382943 -0.428457 5.200000
4.869805 1.124362 -1.725000 0.412827 -0.389097 5.200000
4.709391 1.051352 -1.799995 0.440828 -0.350407 5.200000
4.544271 0.970746 -1.875002 0.466825 -0.312100 5.200000
4.374553 0.882597 -1.950025 0.490649 -0.273964 5.200000
4.200762 0.787289 -2.000000 0.511993 -0.233191 5.200000
4.027239 0.687643 -2.000000 0.529850 -0.188229 5.200000
3.855421 0.585271 -2.000000 0.544192 -0.147531 5.200000
3.684926 0.480727 -2.000000 0.555365 -0.109873 5.200000
3.515448 0.374534 -2.000000 0.563615 -0.074320 5.200000
3.346696 0.267179 -2.000000 0.569093 -0.040171 5.200000
3.178396 0.159132 -2.000000 0.571906 -0.009249 5.200000
3.010232 0.050848 -1.987722 0.571728 0.012589 5.200000
2.845989 -0.054517 -1.913998 0.568116 0.088344 5.200000
2.687357 -0.154749 -1.839002 0.557623 0.189991 5.200000
2.533727 -0.248838 -1.763995 0.540156 0.289990 5.200000
2.384657 -0.335918 -1.688999 0.515911 0.389991 5.200000
2.239818 -0.415258 -1.613999 0.485074 0.489990 5.200000
2.099068 -0.486226 -1.538842 0.447519 0.593060 5.200000
1.962022 -0.548658 -1.468637 0.407250 0.593400 5.200000
1.829566 -0.602813 -1.393619 0.368944 0.593400 5.200000
1.702216 -0.649409 -1.318620 0.332650 0.593400 5.200000
1.580434 -0.689159 -1.243621 0.298358 0.593400 5.200000
1.464597 -0.722753 -1.168622 0.266076 0.593400 5.200000
1.355032 -0.750835 -1.093624 0.235806 0.593400 5.200000
1.252011 -0.774051 -1.018614 0.207537 0.593400 5.200000
1.155745 -0.793008 -0.943615 0.181272 0.593400 5.200000
1.066428 -0.808263 -0.868616 0.157025 0.593400 5.200000
0.984200 -0.820347 -0.793617 0.134771 0.593400 5.200000
0.909177 -0.829745 -0.718618 0.114540 0.593400 5.200000
0.841442 -0.836914 -0.643619 0.096307 0.593400 5.200000
0.781071 -0.842251 -0.568620 0.080088 0.593400 5.200000
0.728098 -0.846125 -0.493621 0.065869 0.593400 5.200000
0.682572 -0.848846 -0.418623 0.053628 0.588670 5.200000
0.644505 -0.850710 -0.343613 0.044282 0.502605 5.200000
0.613919 -0.851968 -0.268614 0.038342 0.402602 5.200000
0.590821 -0.852812 -0.193615 0.034926 0.302604 5.200000
0.575216 -0.853345 -0.118616 0.033305 0.202605 5.200000
0.567063 -0.853611 -0.043617 0.032785 0.102606 5.200000
0.566432 -0.853634 0.031382 0.032740 0.002608 5.200000
0.573370 -0.853404 0.106381 0.032589 -0.097391 5.200000
0.587758 -0.852941 0.181380 0.031715 -0.197400 5.200000
0.609642 -0.852273 0.256378 0.029493 -0.297398 5.200000
0.639054 -0.851464 0.334272 0.025238 -0.397397 5.200000
0.673832 -0.850696 0.332027 0.018604 -0.497396 5.200000
0.703052 -0.850253 0.254584 0.011576 -0.586900 5.200000
0.724755 -0.850064 0.179585 0.005753 -0.593400 5.200000
0.738960 -0.850007 0.104586 0.001953 -0.593400 5.200000
