# Supplementary material for: Automatic Parking Controller with a Twin Artificial Neural Network Architecture
Source: Hindawi journal article supplement (doi:10.1155/2019/4801985), 2019-01-01
Supplement: f1 [file 4801985.f1.zip › data/data_222.txt]

6.900000 1.500000 0.000000 0.000000 0.000000 5.200000
6.896310 1.500000 -0.074999 0.000042 -0.029982 5.200000
6.884990 1.500000 -0.149999 0.000348 -0.068789 5.200000
6.866260 1.499983 -0.225003 0.001116 -0.107450 5.200000
6.839996 1.499934 -0.299997 0.002613 -0.146175 5.200000
6.806255 1.499813 -0.375002 0.005059 -0.184970 5.200000
6.764990 1.499529 -0.449996 0.008711 -0.223834 5.200000
6.716261 1.498980 -0.525000 0.013813 -0.262737 5.200000
6.660010 1.498016 -0.599995 0.020651 -0.301665 5.200000
6.596289 1.496427 -0.674998 0.029470 -0.340551 5.200000
6.525073 1.493940 -0.750003 0.040592 -0.379311 5.200000
6.446424 1.490220 -0.824996 0.054297 -0.417594 5.200000
6.360331 1.484830 -0.900002 0.070830 -0.446340 5.200000
6.266894 1.477314 -0.974995 0.090024 -0.470953 5.200000
6.166149 1.467117 -1.050000 0.112032 -0.495679 5.200000
6.058255 1.453632 -1.125002 0.137072 -0.520393 5.200000
5.943325 1.436128 -1.199998 0.165394 -0.545111 5.200000
5.821614 1.413844 -1.275001 0.197158 -0.566428 5.200000
5.693358 1.385944 -1.349996 0.230801 -0.551022 5.200000
5.558857 1.351922 -1.425000 0.264537 -0.523337 5.200000
5.418360 1.311311 -1.499995 0.297726 -0.491527 5.200000
5.272143 1.263821 -1.574999 0.330004 -0.458095 5.200000
5.120449 1.209154 -1.649998 0.361130 -0.424020 5.200000
4.963507 1.147159 -1.724998 0.390926 -0.389749 5.200000
4.801543 1.077656 -1.799997 0.419203 -0.355461 5.200000
4.634740 1.000597 -1.874996 0.445826 -0.321231 5.200000
4.463227 0.915945 -1.953486 0.470640 -0.287389 5.200000
4.287509 0.823957 -1.989849 0.493316 -0.250016 5.200000
4.112394 0.727526 -2.000000 0.512737 -0.208437 5.200000
3.938937 0.627956 -2.000000 0.528917 -0.171033 5.200000
3.766964 0.525853 -2.000000 0.542175 -0.136863 5.200000
3.596222 0.421708 -2.000000 0.552786 -0.105071 5.200000
3.426465 0.315968 -2.000000 0.560925 -0.075003 5.200000
3.257439 0.209043 -2.000000 0.566718 -0.046179 5.200000
3.088834 0.101291 -1.998742 0.570342 -0.019473 5.200000
2.922067 -0.005824 -1.949779 0.570363 0.043138 5.200000
2.760874 -0.108586 -1.874066 0.563472 0.143229 5.200000
2.604974 -0.205677 -1.799071 0.549160 0.243233 5.200000
2.453816 -0.296114 -1.724068 0.528095 0.343231 5.200000
2.307025 -0.379177 -1.649063 0.500308 0.443226 5.200000
2.164386 -0.454103 -1.573902 0.465902 0.546540 5.200000
2.025575 -0.520542 -1.503649 0.425850 0.593400 5.200000
1.890898 -0.578470 -1.428689 0.386604 0.593400 5.200000
1.761093 -0.628514 -1.353690 0.349369 0.593400 5.200000
1.636663 -0.671379 -1.278691 0.314145 0.593400 5.200000
1.517998 -0.707769 -1.203692 0.280923 0.593400 5.200000
1.405466 -0.738343 -1.128693 0.249712 0.593400 5.200000
1.299350 -0.763767 -1.053685 0.220504 0.593400 5.200000
1.199907 -0.784641 -0.978685 0.193306 0.593400 5.200000
1.107319 -0.801559 -0.903686 0.168109 0.593400 5.200000
1.021758 -0.815054 -0.828687 0.144927 0.593400 5.200000
0.943359 -0.825652 -0.753688 0.123751 0.593400 5.200000
0.872205 -0.833810 -0.678689 0.104581 0.593400 5.200000
0.808383 -0.839960 -0.603690 0.087420 0.593400 5.200000
0.751939 -0.844472 -0.528691 0.072263 0.593400 5.200000
0.702928 -0.847696 -0.453692 0.059116 0.593400 5.200000
0.661374 -0.849929 -0.378686 0.048186 0.552051 5.200000
0.627284 -0.851443 -0.303684 0.040751 0.449361 5.200000
0.600692 -0.852461 -0.228685 0.036257 0.349363 5.200000
0.581573 -0.853129 -0.153686 0.033882 0.249364 5.200000
0.569951 -0.853518 -0.078687 0.032932 0.149366 5.200000
0.566045 -0.853647 -0.003688 0.032743 0.049367 5.200000
0.569216 -0.853540 0.071311 0.032716 -0.050632 5.200000
0.580099 -0.853187 0.146310 0.032251 -0.150635 5.200000
0.598482 -0.852606 0.221309 0.030742 -0.250639 5.200000
0.624350 -0.851852 0.296312 0.027532 -0.350638 5.200000
0.657568 -0.851024 0.353402 0.021911 -0.450636 5.200000
0.690332 -0.850418 0.289654 0.014819 -0.553567 5.200000
0.715542 -0.850128 0.214655 0.008221 -0.592913 5.200000
0.733252 -0.850022 0.139656 0.003480 -0.593400 5.200000
