# Supplementary material for: Automatic Parking Controller with a Twin Artificial Neural Network Architecture
Source: Hindawi journal article supplement (doi:10.1155/2019/4801985), 2019-01-01
Supplement: f1 [file 4801985.f1.zip › data/data_223.txt]

7.000000 1.500000 0.000000 0.000000 0.000000 5.200000
6.996317 1.500000 -0.075002 0.000041 -0.027891 5.200000
6.984983 1.500000 -0.150004 0.000328 -0.065087 5.200000
6.966263 1.499984 -0.225000 0.001076 -0.102083 5.200000
6.939989 1.499937 -0.299998 0.002507 -0.139065 5.200000
6.906266 1.499815 -0.375001 0.004853 -0.176022 5.200000
6.864994 1.499548 -0.450001 0.008343 -0.212910 5.200000
6.816267 1.499028 -0.524997 0.013211 -0.249665 5.200000
6.760011 1.498102 -0.599997 0.019717 -0.286211 5.200000
6.696286 1.496585 -0.675000 0.028094 -0.322409 5.200000
6.625065 1.494216 -0.749997 0.038606 -0.358551 5.200000
6.546403 1.490682 -0.825004 0.051473 -0.388669 5.200000
6.460296 1.485597 -0.900001 0.066724 -0.413280 5.200000
6.366823 1.478533 -0.974998 0.084401 -0.437999 5.200000
6.266023 1.468985 -1.050000 0.104728 -0.462718 5.200000
6.158007 1.456382 -1.125002 0.127918 -0.487437 5.200000
6.042916 1.440056 -1.199998 0.154204 -0.513196 5.200000
5.920925 1.419278 -1.274996 0.183347 -0.522202 5.200000
5.792262 1.393368 -1.349999 0.214120 -0.515053 5.200000
5.657173 1.361723 -1.424999 0.245683 -0.498135 5.200000
5.515916 1.323903 -1.499995 0.277369 -0.475233 5.200000
5.368729 1.279452 -1.574994 0.308723 -0.448645 5.200000
5.215889 1.228090 -1.649999 0.339384 -0.420091 5.200000
5.057634 1.169517 -1.724999 0.369091 -0.390461 5.200000
4.894206 1.103567 -1.800002 0.397653 -0.360320 5.200000
4.725793 1.030067 -1.875000 0.424885 -0.329983 5.200000
4.552603 0.948960 -1.950233 0.450621 -0.299647 5.200000
4.375247 0.860453 -1.999418 0.474571 -0.266282 5.200000
4.198262 0.767105 -2.000000 0.495564 -0.227688 5.200000
4.023205 0.670380 -2.000000 0.513495 -0.193364 5.200000
3.849783 0.570768 -2.000000 0.528764 -0.162427 5.200000
3.677767 0.468738 -2.000000 0.541624 -0.134065 5.200000
3.506965 0.364681 -2.000000 0.552279 -0.107681 5.200000
3.337174 0.258999 -2.000000 0.560889 -0.082787 5.200000
3.168190 0.152014 -2.000000 0.567645 -0.060474 5.200000
3.000014 0.044269 -1.990899 0.570996 -0.006900 5.200000
2.836032 -0.060882 -1.909364 0.567670 0.096169 5.200000
2.677714 -0.160740 -1.834361 0.556779 0.196172 5.200000
2.524386 -0.254432 -1.759362 0.538837 0.296167 5.200000
2.375585 -0.341047 -1.684366 0.514216 0.396172 5.200000
2.230999 -0.419897 -1.609365 0.482942 0.496170 5.200000
2.090483 -0.490340 -1.534521 0.445054 0.593400 5.200000
1.953699 -0.552235 -1.463984 0.404825 0.593400 5.200000
1.821544 -0.605903 -1.388985 0.366643 0.593400 5.200000
1.694526 -0.652055 -1.313985 0.330473 0.593400 5.200000
1.573100 -0.691406 -1.238986 0.296304 0.593400 5.200000
1.457642 -0.724640 -1.163987 0.264147 0.593400 5.200000
1.348474 -0.752405 -1.088989 0.234001 0.593400 5.200000
1.245865 -0.775339 -1.013979 0.205857 0.593400 5.200000
1.150022 -0.794052 -0.938980 0.179715 0.593400 5.200000
1.061140 -0.809095 -0.863981 0.155592 0.593400 5.200000
0.979354 -0.821001 -0.788982 0.133463 0.593400 5.200000
0.904778 -0.830249 -0.713983 0.113355 0.593400 5.200000
0.837496 -0.837294 -0.638984 0.095247 0.593400 5.200000
0.777580 -0.842530 -0.563985 0.079152 0.593400 5.200000
0.725067 -0.846324 -0.488986 0.065057 0.593400 5.200000
0.680002 -0.848984 -0.413988 0.052939 0.586736 5.200000
0.642395 -0.850803 -0.338978 0.043823 0.496424 5.200000
0.612272 -0.852030 -0.263979 0.038065 0.396422 5.200000
0.589632 -0.852852 -0.188980 0.034780 0.296424 5.200000
0.574490 -0.853370 -0.113981 0.033247 0.196425 5.200000
0.566777 -0.853620 -0.038982 0.032773 0.096426 5.200000
0.566674 -0.853626 0.036017 0.032740 -0.003572 5.200000
0.574051 -0.853382 0.111016 0.032561 -0.103570 5.200000
0.588899 -0.852904 0.186015 0.031622 -0.203580 5.200000
0.611244 -0.852225 0.261013 0.029296 -0.303578 5.200000
0.641136 -0.851410 0.340373 0.024886 -0.403577 5.200000
0.675859 -0.850657 0.327237 0.018164 -0.503576 5.200000
0.704614 -0.850235 0.249949 0.011159 -0.588370 5.200000
0.725855 -0.850057 0.174950 0.005459 -0.593400 5.200000
0.739601 -0.850005 0.099951 0.001782 -0.593400 5.200000
