# Supplementary material for: Automatic Parking Controller with a Twin Artificial Neural Network Architecture
Source: Hindawi journal article supplement (doi:10.1155/2019/4801985), 2019-01-01
Supplement: f1 [file 4801985.f1.zip › data/data_224.txt]

7.100000 1.500000 0.000000 0.000000 0.000000 5.200000
7.096321 1.500000 -0.075001 0.000039 -0.025705 5.200000
7.084982 1.500000 -0.150001 0.000318 -0.061243 5.200000
7.066268 1.499985 -0.224996 0.001030 -0.096515 5.200000
7.039990 1.499941 -0.300002 0.002399 -0.131713 5.200000
7.006266 1.499823 -0.374996 0.004636 -0.166788 5.200000
6.964993 1.499563 -0.450003 0.007967 -0.201681 5.200000
6.916264 1.499071 -0.524998 0.012598 -0.236286 5.200000
6.860009 1.498189 -0.599997 0.018770 -0.270494 5.200000
6.796277 1.496754 -0.674999 0.026689 -0.304124 5.200000
6.725062 1.494504 -0.750000 0.036592 -0.335027 5.200000
6.646382 1.491159 -0.825000 0.048562 -0.359916 5.200000
6.560273 1.486371 -0.900002 0.062649 -0.384638 5.200000
6.466749 1.479741 -0.975001 0.079053 -0.409358 5.200000
6.365908 1.470812 -1.049995 0.097965 -0.434075 5.200000
6.257793 1.459020 -1.125002 0.119599 -0.458981 5.200000
6.142558 1.443758 -1.199996 0.144040 -0.479277 5.200000
6.020337 1.424362 -1.274996 0.170784 -0.484669 5.200000
5.891338 1.400225 -1.349998 0.199163 -0.482186 5.200000
5.755751 1.370767 -1.424998 0.228662 -0.471881 5.200000
5.613826 1.335459 -1.499999 0.258713 -0.455616 5.200000
5.465821 1.293878 -1.575000 0.288851 -0.435210 5.200000
5.311963 1.245610 -1.650000 0.318732 -0.412043 5.200000
5.152523 1.190371 -1.724994 0.348038 -0.387232 5.200000
4.987729 1.127866 -1.800001 0.376561 -0.361472 5.200000
4.817827 1.057928 -1.874995 0.404110 -0.335283 5.200000
4.642990 0.980369 -1.952555 0.430537 -0.309378 5.200000
4.463868 0.895337 -1.995222 0.455504 -0.279726 5.200000
4.285299 0.805314 -2.000000 0.477784 -0.244233 5.200000
4.108621 0.711577 -2.000000 0.497281 -0.213106 5.200000
3.933687 0.614646 -2.000000 0.514355 -0.185460 5.200000
3.760324 0.514923 -2.000000 0.529281 -0.160524 5.200000
3.588368 0.412797 -2.000000 0.542268 -0.137762 5.200000
3.417659 0.308590 -2.000000 0.553498 -0.116746 5.200000
3.248041 0.202628 -2.000000 0.563120 -0.096972 5.200000
3.079244 0.095126 -1.997372 0.570344 -0.048951 5.200000
2.912759 -0.011773 -1.945219 0.570436 0.048900 5.200000
2.751899 -0.114257 -1.869815 0.562818 0.148902 5.200000
2.596279 -0.210978 -1.794814 0.548165 0.248905 5.200000
2.445379 -0.301031 -1.719813 0.526691 0.348902 5.200000
2.298835 -0.383639 -1.644813 0.498533 0.448900 5.200000
2.156424 -0.458087 -1.569531 0.463720 0.554536 5.200000
2.017819 -0.524048 -1.499630 0.423571 0.593400 5.200000
1.883405 -0.581510 -1.424437 0.384439 0.593400 5.200000
1.753891 -0.631128 -1.349438 0.347318 0.593400 5.200000
1.629779 -0.673607 -1.274439 0.312208 0.593400 5.200000
1.511452 -0.709651 -1.199440 0.279100 0.593400 5.200000
1.399276 -0.739915 -1.124440 0.248003 0.593400 5.200000
1.293532 -0.765066 -1.049432 0.218908 0.593400 5.200000
1.194472 -0.785701 -0.974432 0.191824 0.593400 5.200000
1.102279 -0.802411 -0.899433 0.166741 0.593400 5.200000
1.017120 -0.815728 -0.824434 0.143671 0.593400 5.200000
0.939131 -0.826175 -0.749435 0.122611 0.593400 5.200000
0.868390 -0.834208 -0.674436 0.103554 0.593400 5.200000
0.804986 -0.840256 -0.599437 0.086507 0.593400 5.200000
0.748961 -0.844686 -0.524438 0.071463 0.593400 5.200000
0.700371 -0.847845 -0.449439 0.058429 0.593400 5.200000
0.659239 -0.850032 -0.374433 0.047667 0.545241 5.200000
0.625573 -0.851512 -0.299431 0.040426 0.443692 5.200000
0.599405 -0.852508 -0.224432 0.036070 0.343693 5.200000
0.580710 -0.853159 -0.149433 0.033795 0.243694 5.200000
0.569505 -0.853532 -0.074434 0.032905 0.143696 5.200000
0.566023 -0.853648 0.000565 0.032742 0.043697 5.200000
0.569647 -0.853526 0.075564 0.032705 -0.056302 5.200000
0.580947 -0.853159 0.150563 0.032198 -0.156306 5.200000
0.599753 -0.852568 0.225562 0.030610 -0.256309 5.200000
0.626045 -0.851806 0.300566 0.027283 -0.356308 5.200000
0.659621 -0.850980 0.351631 0.021513 -0.456306 5.200000
0.691965 -0.850395 0.285401 0.014417 -0.560413 5.200000
0.716751 -0.850119 0.210402 0.007897 -0.593058 5.200000
0.734039 -0.850019 0.135403 0.003269 -0.593400 5.200000
