# Supplementary material for: Automatic Parking Controller with a Twin Artificial Neural Network Architecture
Source: Hindawi journal article supplement (doi:10.1155/2019/4801985), 2019-01-01
Supplement: f1 [file 4801985.f1.zip › data/data_225.txt]

7.200000 1.500000 0.000000 0.000000 0.000000 5.200000
7.196330 1.500000 -0.075001 0.000037 -0.023431 5.200000
7.184980 1.500000 -0.150002 0.000308 -0.057249 5.200000
7.166270 1.499986 -0.225003 0.000982 -0.090737 5.200000
7.139986 1.499944 -0.300004 0.002294 -0.124089 5.200000
7.106265 1.499833 -0.375003 0.004417 -0.157245 5.200000
7.064995 1.499588 -0.449995 0.007573 -0.190129 5.200000
7.016258 1.499112 -0.524996 0.011968 -0.222612 5.200000
6.960013 1.498280 -0.599997 0.017794 -0.254650 5.200000
6.896271 1.496912 -0.674998 0.025268 -0.284781 5.200000
6.825065 1.494790 -0.749999 0.034499 -0.309701 5.200000
6.746367 1.491650 -0.825000 0.045577 -0.334427 5.200000
6.660247 1.487167 -0.900001 0.058659 -0.359146 5.200000
6.566694 1.480959 -0.975002 0.073951 -0.383864 5.200000
6.465789 1.472604 -1.050003 0.091637 -0.408587 5.200000
6.357606 1.461570 -1.125004 0.111884 -0.431708 5.200000
6.242235 1.447289 -1.199995 0.134510 -0.445062 5.200000
6.119826 1.429202 -1.274995 0.159138 -0.451473 5.200000
5.990515 1.406694 -1.349996 0.185438 -0.451601 5.200000
5.854520 1.379242 -1.424997 0.212991 -0.445842 5.200000
5.712028 1.346282 -1.499998 0.241385 -0.434641 5.200000
5.563297 1.307376 -1.574999 0.270202 -0.419418 5.200000
5.408547 1.262074 -1.650000 0.299094 -0.401237 5.200000
5.248028 1.210022 -1.725001 0.327783 -0.381072 5.200000
5.081993 1.150915 -1.800001 0.356037 -0.359723 5.200000
4.910681 1.084459 -1.875002 0.383656 -0.337755 5.200000
4.734320 1.010467 -1.951346 0.410510 -0.315713 5.200000
4.553622 0.928987 -1.998684 0.436282 -0.290025 5.200000
4.373318 0.842286 -2.000000 0.459677 -0.258218 5.200000
4.195031 0.751654 -2.000000 0.480539 -0.230402 5.200000
4.018578 0.657522 -2.000000 0.499233 -0.206045 5.200000
3.843809 0.560271 -2.000000 0.516033 -0.184487 5.200000
3.670623 0.460250 -2.000000 0.531168 -0.165241 5.200000
3.498892 0.357750 -2.000000 0.544823 -0.147927 5.200000
3.328504 0.253025 -2.000000 0.557239 -0.133612 5.200000
3.159316 0.146344 -1.999985 0.567313 -0.092594 5.200000
2.991233 0.038617 -1.981158 0.570753 0.000932 5.200000
2.827541 -0.066287 -1.905415 0.567255 0.101451 5.200000
2.669503 -0.165854 -1.830406 0.556007 0.201453 5.200000
2.516421 -0.259197 -1.755405 0.537692 0.301453 5.200000
2.367843 -0.345409 -1.680404 0.512733 0.401448 5.200000
2.223481 -0.423840 -1.605403 0.481101 0.501447 5.200000
2.083157 -0.493830 -1.530954 0.442929 0.593400 5.200000
1.946602 -0.555266 -1.460024 0.402759 0.593400 5.200000
1.814705 -0.608520 -1.385025 0.364684 0.593400 5.200000
1.687973 -0.654295 -1.310026 0.328620 0.593400 5.200000
1.566853 -0.693306 -1.235027 0.294557 0.593400 5.200000
1.451720 -0.726235 -1.160028 0.262505 0.593400 5.200000
1.342891 -0.753730 -1.085028 0.232465 0.593400 5.200000
1.240635 -0.776426 -1.010019 0.204427 0.593400 5.200000
1.145155 -0.794932 -0.935020 0.178390 0.593400 5.200000
1.056644 -0.809797 -0.860021 0.154375 0.593400 5.200000
0.975237 -0.821552 -0.785022 0.132351 0.593400 5.200000
0.901043 -0.830672 -0.710023 0.112348 0.593400 5.200000
0.834147 -0.837613 -0.635024 0.094347 0.593400 5.200000
0.774621 -0.842763 -0.560025 0.078358 0.593400 5.200000
0.722502 -0.846491 -0.485026 0.064369 0.593400 5.200000
0.677830 -0.849099 -0.410028 0.052362 0.584917 5.200000
0.640617 -0.850881 -0.335018 0.043442 0.491143 5.200000
0.610889 -0.852082 -0.260019 0.037836 0.391143 5.200000
0.588642 -0.852886 -0.185020 0.034661 0.291144 5.200000
0.573894 -0.853390 -0.110021 0.033201 0.191145 5.200000
0.566567 -0.853627 -0.035022 0.032765 0.091146 5.200000
0.566904 -0.853618 0.039977 0.032740 -0.008852 5.200000
0.574656 -0.853362 0.114976 0.032534 -0.108850 5.200000
0.589898 -0.852872 0.189975 0.031539 -0.208860 5.200000
0.612636 -0.852184 0.264973 0.029121 -0.308858 5.200000
0.642934 -0.851364 0.345257 0.024577 -0.408857 5.200000
0.677569 -0.850625 0.322869 0.017788 -0.508856 5.200000
0.705927 -0.850220 0.245989 0.010806 -0.589464 5.200000
0.726774 -0.850051 0.170990 0.005213 -0.593400 5.200000
0.740130 -0.850004 0.095991 0.001642 -0.593400 5.200000
