# Supplementary material for: Automatic Parking Controller with a Twin Artificial Neural Network Architecture
Source: Hindawi journal article supplement (doi:10.1155/2019/4801985), 2019-01-01
Supplement: f1 [file 4801985.f1.zip › data/data_226.txt]

6.600000 1.600000 0.000000 0.000000 0.000000 5.200000
6.596295 1.600000 -0.074998 0.000062 -0.044029 5.200000
6.585016 1.600000 -0.149997 0.000429 -0.094268 5.200000
6.566249 1.599980 -0.224999 0.001430 -0.145190 5.200000
6.540009 1.599924 -0.300003 0.003359 -0.197343 5.200000
6.506251 1.599756 -0.375002 0.006578 -0.251359 5.200000
6.465010 1.599382 -0.449999 0.011462 -0.308323 5.200000
6.416254 1.598661 -0.524999 0.018498 -0.370164 5.200000
6.360035 1.597358 -0.599997 0.028267 -0.442298 5.200000
6.296311 1.595132 -0.674998 0.041799 -0.531533 5.200000
6.225162 1.591539 -0.750002 0.059681 -0.562765 5.200000
6.146596 1.586018 -0.825003 0.080485 -0.575130 5.200000
6.060723 1.578111 -0.899997 0.103377 -0.574428 5.200000
5.967589 1.567274 -0.974999 0.128250 -0.573832 5.200000
5.867368 1.552984 -1.049997 0.155130 -0.575211 5.200000
5.760177 1.534626 -1.124997 0.184004 -0.576961 5.200000
5.646238 1.511606 -1.200000 0.214873 -0.574690 5.200000
5.525783 1.483237 -1.275003 0.247705 -0.574410 5.200000
5.399133 1.448850 -1.349996 0.282537 -0.574732 5.200000
5.266616 1.407725 -1.424999 0.319369 -0.575477 5.200000
5.128694 1.359132 -1.499998 0.358176 -0.574881 5.200000
4.985840 1.302308 -1.574996 0.398951 -0.572976 5.200000
4.838634 1.236518 -1.649999 0.441101 -0.554858 5.200000
4.687496 1.161477 -1.725002 0.479290 -0.471356 5.200000
4.532532 1.077543 -1.799995 0.512182 -0.392958 5.200000
4.373683 0.985191 -1.874999 0.540152 -0.324990 5.200000
4.210889 0.884798 -1.951708 0.563925 -0.264427 5.200000
4.044409 0.777135 -1.998477 0.583384 -0.202986 5.200000
3.878322 0.665651 -2.000000 0.597837 -0.139794 5.200000
3.713591 0.552235 -2.000000 0.607355 -0.081611 5.200000
3.549704 0.437606 -2.000000 0.612528 -0.026611 5.200000
3.386125 0.322533 -2.000000 0.612998 0.017921 5.200000
3.222318 0.207781 -2.000000 0.608420 0.073205 5.200000
3.057744 0.094137 -1.996383 0.599549 0.130414 5.200000
2.894333 -0.016070 -1.934480 0.586292 0.183308 5.200000
2.735498 -0.119730 -1.859140 0.569492 0.234191 5.200000
2.581151 -0.216476 -1.784138 0.549464 0.282694 5.200000
2.431192 -0.306014 -1.709140 0.526230 0.356877 5.200000
2.285519 -0.388001 -1.634141 0.497573 0.458639 5.200000
2.143980 -0.461765 -1.558392 0.462156 0.566317 5.200000
2.005931 -0.527156 -1.493323 0.421900 0.593400 5.200000
1.872054 -0.584142 -1.417630 0.382949 0.593400 5.200000
1.743110 -0.633340 -1.342630 0.346013 0.593400 5.200000
1.619591 -0.675451 -1.267630 0.311074 0.593400 5.200000
1.501878 -0.711162 -1.192630 0.278158 0.593400 5.200000
1.390332 -0.741164 -1.117629 0.247232 0.593400 5.200000
1.285236 -0.766075 -1.042620 0.218328 0.593400 5.200000
1.186832 -0.786528 -0.967620 0.191424 0.593400 5.200000
1.095309 -0.803087 -0.892620 0.166532 0.593400 5.200000
1.010818 -0.816291 -0.817620 0.143640 0.593400 5.200000
0.933501 -0.826651 -0.742620 0.122761 0.593400 5.200000
0.863435 -0.834631 -0.667620 0.103881 0.593400 5.200000
0.800715 -0.840629 -0.592620 0.087023 0.593400 5.200000
0.745381 -0.845046 -0.517620 0.072166 0.593400 5.200000
0.697469 -0.848198 -0.442620 0.059311 0.593400 5.200000
0.657016 -0.850381 -0.367620 0.048700 0.546935 5.200000
0.624032 -0.851870 -0.292620 0.041584 0.445050 5.200000
0.598546 -0.852872 -0.217620 0.037335 0.345045 5.200000
0.580537 -0.853523 -0.142620 0.035136 0.245046 5.200000
0.570014 -0.853885 -0.067620 0.034279 0.145049 5.200000
0.567202 -0.853987 0.007380 0.034150 0.045045 5.200000
0.571497 -0.853837 0.082380 0.034108 -0.054959 5.200000
0.583488 -0.853429 0.157380 0.033589 -0.154956 5.200000
0.602971 -0.852794 0.232380 0.031946 -0.254955 5.200000
0.629944 -0.851968 0.307380 0.028545 -0.354960 5.200000
0.664214 -0.851089 0.365723 0.022686 -0.454955 5.200000
0.697580 -0.850452 0.294870 0.015393 -0.557711 5.200000
0.723311 -0.850136 0.219870 0.008629 -0.593400 5.200000
0.741548 -0.850024 0.144870 0.003746 -0.593400 5.200000
