# Supplementary material for: Automatic Parking Controller with a Twin Artificial Neural Network Architecture
Source: Hindawi journal article supplement (doi:10.1155/2019/4801985), 2019-01-01
Supplement: f1 [file 4801985.f1.zip › data/data_227.txt]

6.700000 1.600000 0.000000 0.000000 0.000000 5.200000
6.696298 1.600000 -0.075001 0.000057 -0.039267 5.200000
6.685000 1.600000 -0.150002 0.000406 -0.085578 5.200000
6.666254 1.599981 -0.224997 0.001323 -0.132211 5.200000
6.640008 1.599928 -0.300004 0.003096 -0.179544 5.200000
6.606249 1.599768 -0.374999 0.006047 -0.227895 5.200000
6.565008 1.599436 -0.449995 0.010492 -0.277708 5.200000
6.516255 1.598776 -0.525002 0.016805 -0.329754 5.200000
6.460021 1.597599 -0.599997 0.025415 -0.385452 5.200000
6.396299 1.595618 -0.675003 0.036881 -0.447729 5.200000
6.325120 1.592473 -0.749999 0.052048 -0.527073 5.200000
6.246517 1.587616 -0.825000 0.071519 -0.551211 5.200000
6.160575 1.580497 -0.900000 0.093972 -0.574446 5.200000
6.067347 1.570537 -0.974995 0.118862 -0.574439 5.200000
5.966988 1.557185 -1.050002 0.145731 -0.574741 5.200000
5.859627 1.539839 -1.124997 0.174590 -0.574704 5.200000
5.745485 1.517897 -1.200004 0.205424 -0.573978 5.200000
5.624766 1.490662 -1.275000 0.238265 -0.574035 5.200000
5.497790 1.457481 -1.349996 0.273106 -0.575711 5.200000
5.364896 1.417603 -1.425002 0.309930 -0.575709 5.200000
5.226525 1.370314 -1.499997 0.348696 -0.571809 5.200000
5.083130 1.314838 -1.575000 0.389417 -0.567795 5.200000
4.935218 1.250691 -1.649999 0.428020 -0.497400 5.200000
4.782941 1.177960 -1.725002 0.461883 -0.425645 5.200000
4.626402 1.096999 -1.800000 0.491921 -0.367831 5.200000
4.465651 1.007992 -1.874996 0.518586 -0.314300 5.200000
4.300687 0.911199 -1.951090 0.541904 -0.262607 5.200000
4.131900 0.807195 -1.998262 0.561666 -0.208962 5.200000
3.963447 0.699299 -2.000000 0.576957 -0.153044 5.200000
3.796473 0.589215 -2.000000 0.587916 -0.101537 5.200000
3.630475 0.477664 -2.000000 0.594834 -0.052723 5.200000
3.465051 0.365261 -2.000000 0.598109 -0.007718 5.200000
3.299740 0.252685 -2.000000 0.597041 0.028424 5.200000
3.134071 0.140609 -2.000000 0.591816 0.076806 5.200000
2.968242 0.030141 -1.970774 0.582918 0.122986 5.200000
2.806458 -0.075208 -1.892635 0.570750 0.165501 5.200000
2.649646 -0.174317 -1.817637 0.555941 0.209576 5.200000
2.497627 -0.266937 -1.742633 0.536977 0.313982 5.200000
2.350054 -0.352345 -1.667638 0.511233 0.413980 5.200000
2.206666 -0.429893 -1.592633 0.478834 0.513983 5.200000
2.067194 -0.499002 -1.520917 0.440049 0.593400 5.200000
1.931266 -0.559702 -1.451125 0.400098 0.593400 5.200000
1.800055 -0.612282 -1.376125 0.362257 0.593400 5.200000
1.674057 -0.657472 -1.301125 0.326433 0.593400 5.200000
1.553703 -0.695961 -1.226125 0.292607 0.593400 5.200000
1.439371 -0.728430 -1.151125 0.260796 0.593400 5.200000
1.331362 -0.755539 -1.076114 0.230989 0.593400 5.200000
1.229938 -0.777904 -1.001115 0.203192 0.593400 5.200000
1.135319 -0.796132 -0.926115 0.177397 0.593400 5.200000
1.047674 -0.810769 -0.851115 0.153612 0.593400 5.200000
0.967144 -0.822344 -0.776115 0.131839 0.593400 5.200000
0.893830 -0.831335 -0.701115 0.112066 0.593400 5.200000
0.827818 -0.838167 -0.626115 0.094305 0.593400 5.200000
0.769176 -0.843247 -0.551115 0.078554 0.593400 5.200000
0.717941 -0.846927 -0.476115 0.064805 0.593400 5.200000
0.674161 -0.849510 -0.401115 0.053030 0.584342 5.200000
0.637835 -0.851270 -0.326115 0.044358 0.489706 5.200000
0.609003 -0.852472 -0.251115 0.038930 0.389704 5.200000
0.587647 -0.853272 -0.176115 0.035912 0.289710 5.200000
0.573787 -0.853757 -0.101115 0.034533 0.189705 5.200000
0.567390 -0.853979 -0.026115 0.034160 0.089705 5.200000
0.568557 -0.853941 0.048885 0.034146 -0.010298 5.200000
0.577218 -0.853639 0.123885 0.033918 -0.110294 5.200000
0.593347 -0.853104 0.198885 0.032855 -0.210299 5.200000
0.616976 -0.852355 0.273885 0.030329 -0.310297 5.200000
0.648166 -0.851476 0.353132 0.025626 -0.410295 5.200000
0.683662 -0.850685 0.329415 0.018648 -0.510299 5.200000
0.712752 -0.850246 0.253365 0.011472 -0.592549 5.200000
0.734335 -0.850060 0.178365 0.005677 -0.593400 5.200000
0.748417 -0.850006 0.103365 0.001910 -0.593400 5.200000
