# Supplementary material for: Automatic Parking Controller with a Twin Artificial Neural Network Architecture
Source: Hindawi journal article supplement (doi:10.1155/2019/4801985), 2019-01-01
Supplement: f1 [file 4801985.f1.zip › data/data_228.txt]

6.800000 1.600000 0.000000 0.000000 0.000000 5.200000
6.796304 1.600000 -0.075001 0.000055 -0.035520 5.200000
6.784992 1.600000 -0.150001 0.000384 -0.078794 5.200000
6.766259 1.599982 -0.225002 0.001236 -0.122174 5.200000
6.739991 1.599932 -0.300002 0.002907 -0.165940 5.200000
6.706257 1.599785 -0.375003 0.005646 -0.210242 5.200000
6.664993 1.599476 -0.450003 0.009758 -0.255269 5.200000
6.616263 1.598862 -0.525004 0.015559 -0.301330 5.200000
6.560017 1.597770 -0.600004 0.023403 -0.348880 5.200000
6.496295 1.595964 -0.675001 0.033685 -0.398784 5.200000
6.425099 1.593099 -0.749996 0.046885 -0.452732 5.200000
6.346473 1.588769 -0.824996 0.063696 -0.510828 5.200000
6.260451 1.582398 -0.899997 0.084351 -0.539009 5.200000
6.167149 1.573406 -0.974997 0.108167 -0.565044 5.200000
6.066633 1.561126 -1.049998 0.134947 -0.574716 5.200000
5.959107 1.544956 -1.124998 0.163793 -0.574119 5.200000
5.844714 1.524221 -1.199999 0.194637 -0.573394 5.200000
5.723725 1.498314 -1.275000 0.227482 -0.574786 5.200000
5.596386 1.466488 -1.350000 0.262324 -0.576337 5.200000
5.463085 1.428057 -1.425001 0.299099 -0.572983 5.200000
5.324193 1.382252 -1.500001 0.337986 -0.571604 5.200000
5.180169 1.328496 -1.575002 0.375763 -0.515245 5.200000
5.031245 1.266663 -1.650002 0.410213 -0.455750 5.200000
4.877614 1.196891 -1.725003 0.441755 -0.404973 5.200000
4.719411 1.119181 -1.800003 0.470635 -0.357709 5.200000
4.556787 1.033680 -1.875004 0.496865 -0.312097 5.200000
4.389769 0.940478 -1.950984 0.520370 -0.267428 5.200000
4.218833 0.840106 -2.000000 0.540823 -0.220349 5.200000
4.048219 0.735618 -2.000000 0.557338 -0.169673 5.200000
3.879187 0.628722 -2.000000 0.569889 -0.123500 5.200000
3.711320 0.519996 -2.000000 0.578882 -0.080301 5.200000
3.544240 0.410071 -2.000000 0.584470 -0.038844 5.200000
3.377611 0.299464 -2.000000 0.586829 -0.004654 5.200000
3.211027 0.188785 -2.000000 0.585494 0.026912 5.200000
3.043977 0.078535 -1.992427 0.580575 0.067167 5.200000
2.879430 -0.028545 -1.926650 0.572767 0.103486 5.200000
2.720167 -0.130165 -1.851650 0.562362 0.166316 5.200000
2.565992 -0.225764 -1.776649 0.546505 0.268628 5.200000
2.416448 -0.314554 -1.701649 0.523718 0.368628 5.200000
2.271188 -0.395735 -1.626648 0.494350 0.468629 5.200000
2.130074 -0.468665 -1.550688 0.458228 0.578484 5.200000
1.992349 -0.533223 -1.485762 0.417919 0.593400 5.200000
1.858942 -0.589395 -1.410138 0.379168 0.593400 5.200000
1.730518 -0.637854 -1.335137 0.342434 0.593400 5.200000
1.607563 -0.679296 -1.260137 0.307694 0.593400 5.200000
1.490453 -0.714406 -1.185138 0.274979 0.593400 5.200000
1.379540 -0.743871 -1.110135 0.244254 0.593400 5.200000
1.275101 -0.768307 -1.035127 0.215550 0.593400 5.200000
1.177378 -0.788346 -0.960127 0.188847 0.593400 5.200000
1.086553 -0.804546 -0.885127 0.164155 0.593400 5.200000
1.002773 -0.817445 -0.810127 0.141465 0.593400 5.200000
0.926178 -0.827547 -0.735127 0.120786 0.593400 5.200000
0.856841 -0.835312 -0.660127 0.102107 0.593400 5.200000
0.794857 -0.841135 -0.585127 0.085450 0.593400 5.200000
0.740263 -0.845412 -0.510128 0.070793 0.593400 5.200000
0.693096 -0.848455 -0.435127 0.058138 0.593400 5.200000
0.653386 -0.850556 -0.360127 0.047832 0.535318 5.200000
0.621149 -0.851990 -0.285127 0.041044 0.435060 5.200000
0.596408 -0.852952 -0.210127 0.037036 0.335056 5.200000
0.579147 -0.853572 -0.135127 0.035000 0.235054 5.200000
0.569362 -0.853907 -0.060127 0.034242 0.135060 5.200000
0.567285 -0.853985 0.014873 0.034150 0.035056 5.200000
0.572379 -0.853806 0.089873 0.034085 -0.064948 5.200000
0.585106 -0.853375 0.164873 0.033483 -0.164948 5.200000
0.605336 -0.852719 0.239873 0.031696 -0.264944 5.200000
0.633055 -0.851879 0.314873 0.028078 -0.364949 5.200000
0.667894 -0.851006 0.360205 0.021961 -0.464947 5.200000
0.700495 -0.850410 0.287377 0.014663 -0.570605 5.200000
0.725477 -0.850119 0.212377 0.008050 -0.593400 5.200000
0.742966 -0.850020 0.137377 0.003368 -0.593400 5.200000
