# Supplementary material for: Automatic Parking Controller with a Twin Artificial Neural Network Architecture
Source: Hindawi journal article supplement (doi:10.1155/2019/4801985), 2019-01-01
Supplement: f1 [file 4801985.f1.zip › data/data_229.txt]

6.900000 1.600000 0.000000 0.000000 0.000000 5.200000
6.896311 1.600000 -0.075000 0.000053 -0.032619 5.200000
6.884992 1.600000 -0.150001 0.000362 -0.073593 5.200000
6.866261 1.599983 -0.225000 0.001178 -0.114542 5.200000
6.839988 1.599936 -0.300002 0.002755 -0.155694 5.200000
6.806256 1.599796 -0.374997 0.005340 -0.197098 5.200000
6.764992 1.599505 -0.450001 0.009216 -0.238843 5.200000
6.716263 1.598925 -0.524997 0.014659 -0.281013 5.200000
6.660003 1.597902 -0.600002 0.021962 -0.323744 5.200000
6.596296 1.596204 -0.674998 0.031457 -0.367256 5.200000
6.525085 1.593544 -0.750002 0.043517 -0.411929 5.200000
6.446447 1.589541 -0.824999 0.058538 -0.459010 5.200000
6.360389 1.583708 -0.900002 0.077056 -0.499557 5.200000
6.267003 1.575497 -0.975000 0.098854 -0.524479 5.200000
6.166377 1.564255 -1.050002 0.123750 -0.549198 5.200000
6.058662 1.549332 -1.125001 0.151966 -0.572661 5.200000
5.944043 1.529962 -1.199996 0.182804 -0.573514 5.200000
5.822745 1.505485 -1.275002 0.215665 -0.576231 5.200000
5.695045 1.475168 -1.349996 0.250479 -0.574873 5.200000
5.561294 1.438314 -1.425003 0.287214 -0.568900 5.200000
5.421832 1.394289 -1.499997 0.323697 -0.528976 5.200000
5.276956 1.342831 -1.575003 0.358172 -0.479991 5.200000
5.126907 1.283823 -1.649998 0.390581 -0.436280 5.200000
4.971880 1.217158 -1.725003 0.421004 -0.394711 5.200000
4.812092 1.142809 -1.799999 0.449389 -0.354260 5.200000
4.647671 1.060762 -1.874994 0.475642 -0.314446 5.200000
4.478725 0.971112 -1.952772 0.499618 -0.275062 5.200000
4.305704 0.874175 -1.989730 0.521009 -0.232531 5.200000
4.133207 0.773061 -2.000000 0.538759 -0.186624 5.200000
3.962304 0.669170 -2.000000 0.552932 -0.144755 5.200000
3.792703 0.563160 -2.000000 0.563831 -0.105933 5.200000
3.624123 0.455563 -2.000000 0.571743 -0.069221 5.200000
3.456222 0.346886 -2.000000 0.576742 -0.033806 5.200000
3.288729 0.237593 -2.000000 0.578976 -0.004794 5.200000
3.121287 0.128188 -1.999779 0.578042 0.018480 5.200000
2.954451 0.019761 -1.962714 0.574009 0.047813 5.200000
2.792580 -0.084239 -1.886056 0.567468 0.122584 5.200000
2.636121 -0.182707 -1.811061 0.554679 0.222753 5.200000
2.484505 -0.274712 -1.736055 0.534994 0.322747 5.200000
2.337319 -0.359478 -1.661060 0.508647 0.422751 5.200000
2.194284 -0.436289 -1.586054 0.475687 0.522754 5.200000
2.055092 -0.504670 -1.516104 0.436446 0.593400 5.200000
1.919561 -0.564629 -1.444547 0.396698 0.593400 5.200000
1.788788 -0.616534 -1.369547 0.359035 0.593400 5.200000
1.663271 -0.661108 -1.294547 0.323385 0.593400 5.200000
1.543429 -0.699040 -1.219547 0.289738 0.593400 5.200000
1.429640 -0.731014 -1.144548 0.258100 0.593400 5.200000
1.322200 -0.757681 -1.069537 0.228472 0.593400 5.200000
1.221366 -0.779661 -0.994537 0.200850 0.593400 5.200000
1.127353 -0.797552 -0.919537 0.175232 0.593400 5.200000
1.040325 -0.811899 -0.844537 0.151622 0.593400 5.200000
0.960426 -0.823227 -0.769537 0.130025 0.593400 5.200000
0.887750 -0.832014 -0.694537 0.110428 0.593400 5.200000
0.822384 -0.838676 -0.619537 0.092844 0.593400 5.200000
0.764391 -0.843621 -0.544537 0.077270 0.593400 5.200000
0.713807 -0.847193 -0.469537 0.063696 0.593400 5.200000
0.670681 -0.849693 -0.394537 0.052125 0.581031 5.200000
0.635011 -0.851395 -0.319537 0.043767 0.480937 5.200000
0.606835 -0.852555 -0.244537 0.038582 0.380934 5.200000
0.586133 -0.853326 -0.169537 0.035736 0.280940 5.200000
0.572930 -0.853787 -0.094537 0.034467 0.180936 5.200000
0.567185 -0.853987 -0.019537 0.034153 0.080934 5.200000
0.569052 -0.853924 0.055463 0.034144 -0.019069 5.200000
0.578344 -0.853601 0.130463 0.033867 -0.119063 5.200000
0.595127 -0.853045 0.205463 0.032698 -0.219068 5.200000
0.619412 -0.852280 0.280463 0.030012 -0.319068 5.200000
0.651281 -0.851397 0.361050 0.025081 -0.419064 5.200000
0.686518 -0.850633 0.322534 0.018008 -0.519069 5.200000
0.714950 -0.850219 0.246787 0.010880 -0.592946 5.200000
0.735879 -0.850051 0.171787 0.005263 -0.593400 5.200000
0.749310 -0.850004 0.096787 0.001670 -0.593400 5.200000
