# Supplementary material for: Automatic Parking Controller with a Twin Artificial Neural Network Architecture
Source: Hindawi journal article supplement (doi:10.1155/2019/4801985), 2019-01-01
Supplement: f1 [file 4801985.f1.zip › data/data_230.txt]

7.000000 1.600000 0.000000 -0.000000 0.000000 5.200000
6.996316 1.600000 -0.075001 0.000052 -0.030390 5.200000
6.984983 1.600000 -0.150002 0.000351 -0.069637 5.200000
6.966267 1.599984 -0.224998 0.001128 -0.108770 5.200000
6.939988 1.599939 -0.300003 0.002647 -0.148002 5.200000
6.906265 1.599804 -0.375001 0.005114 -0.187340 5.200000
6.864994 1.599522 -0.449996 0.008818 -0.226800 5.200000
6.816260 1.598973 -0.525004 0.013992 -0.266384 5.200000
6.760008 1.597991 -0.599999 0.020928 -0.306106 5.200000
6.696294 1.596383 -0.674996 0.029896 -0.345955 5.200000
6.625078 1.593857 -0.750002 0.041214 -0.385899 5.200000
6.546418 1.590074 -0.824998 0.055187 -0.426042 5.200000
6.460348 1.584595 -0.899999 0.072147 -0.459778 5.200000
6.366914 1.576923 -0.975000 0.091989 -0.484051 5.200000
6.266211 1.566494 -1.049996 0.114704 -0.508768 5.200000
6.158339 1.552672 -1.125002 0.140529 -0.533485 5.200000
6.043485 1.534740 -1.199999 0.169710 -0.558602 5.200000
5.921873 1.511862 -1.274994 0.202338 -0.577493 5.200000
5.793786 1.483268 -1.350002 0.236937 -0.565146 5.200000
5.659511 1.448313 -1.424997 0.271776 -0.536347 5.200000
5.519337 1.406647 -1.499995 0.305777 -0.500201 5.200000
5.373515 1.357917 -1.575000 0.338610 -0.463913 5.200000
5.222311 1.301937 -1.649996 0.370113 -0.427722 5.200000
5.065944 1.238498 -1.725003 0.400132 -0.391720 5.200000
4.904632 1.167498 -1.799998 0.428513 -0.355898 5.200000
4.738550 1.088894 -1.874999 0.455119 -0.320220 5.200000
4.567838 1.002662 -1.950326 0.479781 -0.284728 5.200000
4.393096 0.909176 -2.000000 0.502172 -0.246401 5.200000
4.218666 0.811130 -2.000000 0.521261 -0.203337 5.200000
4.046043 0.710133 -2.000000 0.536956 -0.164637 5.200000
3.874873 0.606690 -2.000000 0.549664 -0.129160 5.200000
3.704882 0.501336 -2.000000 0.559590 -0.095965 5.200000
3.535804 0.394503 -2.000000 0.566950 -0.064431 5.200000
3.367378 0.286644 -2.000000 0.571824 -0.033986 5.200000
3.199356 0.178160 -2.000000 0.574372 -0.007102 5.200000
3.031467 0.069486 -1.987486 0.574154 0.010415 5.200000
2.866902 -0.036679 -1.921451 0.570889 0.073335 5.200000
2.708029 -0.137816 -1.845832 0.561455 0.176391 5.200000
2.554225 -0.232911 -1.770825 0.544979 0.276392 5.200000
2.405021 -0.321135 -1.695829 0.521668 0.376390 5.200000
2.260091 -0.401698 -1.620831 0.491803 0.476392 5.200000
2.119286 -0.473967 -1.544887 0.455152 0.586011 5.200000
1.981830 -0.537877 -1.479732 0.414840 0.593400 5.200000
1.848790 -0.593423 -1.404317 0.376244 0.593400 5.200000
1.720774 -0.641312 -1.329317 0.339667 0.593400 5.200000
1.598258 -0.682240 -1.254317 0.305082 0.593400 5.200000
1.481620 -0.716887 -1.179317 0.272522 0.593400 5.200000
1.371200 -0.745941 -1.104313 0.241955 0.593400 5.200000
1.267273 -0.770012 -1.029307 0.213406 0.593400 5.200000
1.170079 -0.789733 -0.954307 0.186858 0.593400 5.200000
1.079797 -0.805658 -0.879307 0.162322 0.593400 5.200000
0.996572 -0.818322 -0.804307 0.139789 0.593400 5.200000
0.920537 -0.828227 -0.729307 0.119265 0.593400 5.200000
0.851769 -0.835827 -0.654307 0.100743 0.593400 5.200000
0.790358 -0.841517 -0.579307 0.084241 0.593400 5.200000
0.736340 -0.845688 -0.504307 0.069740 0.593400 5.200000
0.689753 -0.848648 -0.429307 0.057239 0.593255 5.200000
0.650622 -0.850687 -0.354307 0.047190 0.527293 5.200000
0.618968 -0.852080 -0.279307 0.040646 0.427300 5.200000
0.594808 -0.853012 -0.204307 0.036819 0.327297 5.200000
0.578130 -0.853607 -0.129307 0.034904 0.227293 5.200000
0.568933 -0.853922 -0.054307 0.034221 0.127300 5.200000
0.567363 -0.853982 0.020693 0.034150 0.027297 5.200000
0.573107 -0.853780 0.095693 0.034065 -0.072707 5.200000
0.586412 -0.853332 0.170693 0.033393 -0.172709 5.200000
0.607223 -0.852660 0.245693 0.031490 -0.272703 5.200000
0.635522 -0.851810 0.320693 0.027698 -0.372708 5.200000
0.670733 -0.850943 0.355121 0.021391 -0.472708 5.200000
0.702708 -0.850378 0.281557 0.014099 -0.579613 5.200000
0.727110 -0.850107 0.206557 0.007612 -0.593400 5.200000
0.744020 -0.850017 0.131557 0.003087 -0.593400 5.200000
