# Supplementary material for: Automatic Parking Controller with a Twin Artificial Neural Network Architecture
Source: Hindawi journal article supplement (doi:10.1155/2019/4801985), 2019-01-01
Supplement: f1 [file 4801985.f1.zip › data/data_231.txt]

7.100000 1.600000 0.000000 0.000000 0.000000 5.200000
7.096323 1.600000 -0.075002 0.000050 -0.028528 5.200000
7.084981 1.600000 -0.150003 0.000341 -0.066350 5.200000
7.066272 1.599985 -0.224998 0.001091 -0.104005 5.200000
7.039986 1.599934 -0.299996 0.002553 -0.141682 5.200000
7.006260 1.599816 -0.375001 0.004934 -0.179378 5.200000
6.964998 1.599542 -0.450000 0.008494 -0.217065 5.200000
6.916260 1.599008 -0.525002 0.013454 -0.254708 5.200000
6.860013 1.598067 -0.599999 0.020092 -0.292254 5.200000
6.796285 1.596521 -0.674995 0.028666 -0.329590 5.200000
6.725075 1.594105 -0.750002 0.039422 -0.366775 5.200000
6.646398 1.590493 -0.824998 0.052653 -0.401278 5.200000
6.560322 1.585286 -0.900001 0.068429 -0.426438 5.200000
6.466842 1.578023 -0.975000 0.086736 -0.451160 5.200000
6.366082 1.568219 -1.049995 0.107744 -0.475875 5.200000
6.258106 1.555236 -1.125003 0.131687 -0.500598 5.200000
6.143080 1.538440 -1.199998 0.158788 -0.525363 5.200000
6.021200 1.517030 -1.274999 0.189112 -0.541041 5.200000
5.892705 1.490282 -1.350000 0.221200 -0.531750 5.200000
5.757867 1.457624 -1.424996 0.253843 -0.511150 5.200000
5.616926 1.418565 -1.500003 0.286362 -0.484511 5.200000
5.470175 1.372777 -1.574998 0.318302 -0.454899 5.200000
5.317836 1.319897 -1.649997 0.349344 -0.423733 5.200000
5.160194 1.259745 -1.725000 0.379259 -0.391837 5.200000
4.997431 1.192117 -1.799996 0.407840 -0.359612 5.200000
4.829784 1.116927 -1.875003 0.434924 -0.327276 5.200000
4.657376 1.034088 -1.953805 0.460369 -0.295247 5.200000
4.480764 0.943846 -1.988616 0.483836 -0.259427 5.200000
4.304787 0.849015 -2.000000 0.504150 -0.219295 5.200000
4.130530 0.750850 -2.000000 0.521325 -0.183215 5.200000
3.957839 0.649964 -2.000000 0.535673 -0.150447 5.200000
3.786484 0.546825 -2.000000 0.547491 -0.120171 5.200000
3.616232 0.441876 -2.000000 0.556938 -0.091740 5.200000
3.446870 0.335513 -2.000000 0.564184 -0.064707 5.200000
3.278153 0.228107 -2.000000 0.569317 -0.038653 5.200000
3.109811 0.119951 -1.999829 0.572521 -0.014820 5.200000
2.942940 0.012271 -1.956270 0.572736 0.031656 5.200000
2.781471 -0.091315 -1.880813 0.566857 0.129739 5.200000
2.625372 -0.189367 -1.805815 0.553504 0.229741 5.200000
2.474074 -0.280879 -1.730813 0.533391 0.329738 5.200000
2.327182 -0.365117 -1.655815 0.506549 0.429740 5.200000
2.184447 -0.441335 -1.580777 0.473135 0.530179 5.200000
2.045469 -0.509138 -1.512204 0.433574 0.593400 5.200000
1.910258 -0.568511 -1.439305 0.394000 0.593400 5.200000
1.779836 -0.619882 -1.364305 0.356479 0.593400 5.200000
1.654705 -0.663969 -1.289305 0.320966 0.593400 5.200000
1.535273 -0.701461 -1.214305 0.287463 0.593400 5.200000
1.421918 -0.733045 -1.139306 0.255962 0.593400 5.200000
1.314932 -0.759363 -1.064294 0.226475 0.593400 5.200000
1.214570 -0.781040 -0.989295 0.198994 0.593400 5.200000
1.121041 -0.798666 -0.914295 0.173517 0.593400 5.200000
1.034506 -0.812784 -0.839295 0.150047 0.593400 5.200000
0.955109 -0.823919 -0.764295 0.128590 0.593400 5.200000
0.882941 -0.832544 -0.689295 0.109133 0.593400 5.200000
0.818091 -0.839073 -0.614295 0.091691 0.593400 5.200000
0.760616 -0.843911 -0.539295 0.076256 0.593400 5.200000
0.710553 -0.847398 -0.464295 0.062823 0.593400 5.200000
0.667949 -0.849834 -0.389295 0.051426 0.577175 5.200000
0.632803 -0.851492 -0.314295 0.043315 0.473947 5.200000
0.605154 -0.852620 -0.239295 0.038320 0.373943 5.200000
0.584979 -0.853367 -0.164295 0.035607 0.273950 5.200000
0.572305 -0.853808 -0.089295 0.034424 0.173947 5.200000
0.567107 -0.853990 -0.014295 0.034150 0.073943 5.200000
0.569463 -0.853909 0.060705 0.034142 -0.026060 5.200000
0.579275 -0.853570 0.135705 0.033823 -0.126053 5.200000
0.596584 -0.852998 0.210705 0.032566 -0.226057 5.200000
0.621391 -0.852220 0.285705 0.029748 -0.326059 5.200000
0.653782 -0.851336 0.366019 0.024635 -0.426053 5.200000
0.688753 -0.850594 0.316961 0.017498 -0.526058 5.200000
0.716660 -0.850199 0.241545 0.010417 -0.593176 5.200000
0.737068 -0.850044 0.166545 0.004944 -0.593400 5.200000
0.749981 -0.850002 0.091545 0.001489 -0.593400 5.200000
