# Supplementary material for: Automatic Parking Controller with a Twin Artificial Neural Network Architecture
Source: Hindawi journal article supplement (doi:10.1155/2019/4801985), 2019-01-01
Supplement: f1 [file 4801985.f1.zip › data/data_232.txt]

7.200000 1.600000 0.000000 0.000000 0.000000 5.200000
7.196328 1.600000 -0.074998 0.000039 -0.026532 5.200000
7.184976 1.600000 -0.149995 0.000330 -0.062837 5.200000
7.166270 1.599986 -0.225004 0.001054 -0.098919 5.200000
7.139990 1.599938 -0.300001 0.002453 -0.134960 5.200000
7.106260 1.599826 -0.374999 0.004741 -0.170931 5.200000
7.065001 1.599556 -0.449997 0.008150 -0.206777 5.200000
7.016249 1.599052 -0.524995 0.012894 -0.242427 5.200000
6.960019 1.598148 -0.600004 0.019228 -0.277774 5.200000
6.896275 1.596671 -0.675001 0.027375 -0.312638 5.200000
6.825072 1.594365 -0.749999 0.037566 -0.346552 5.200000
6.746390 1.590927 -0.824996 0.049990 -0.373290 5.200000
6.660288 1.585999 -0.900005 0.064631 -0.397915 5.200000
6.566785 1.579157 -0.975002 0.081632 -0.422629 5.200000
6.465956 1.569922 -1.050000 0.101215 -0.447353 5.200000
6.357898 1.557746 -1.124998 0.123581 -0.472101 5.200000
6.242717 1.541966 -1.199995 0.148967 -0.497495 5.200000
6.120618 1.521914 -1.275004 0.176907 -0.503289 5.200000
5.991773 1.496892 -1.350002 0.206517 -0.499024 5.200000
5.856437 1.466370 -1.424999 0.237103 -0.485882 5.200000
5.714835 1.429796 -1.499997 0.268063 -0.466441 5.200000
5.567233 1.386765 -1.574995 0.298909 -0.442865 5.200000
5.413884 1.336933 -1.650004 0.329261 -0.416813 5.200000
5.255039 1.279970 -1.725001 0.358838 -0.389262 5.200000
5.090935 1.215704 -1.799999 0.387413 -0.360922 5.200000
4.921795 1.143923 -1.874996 0.414804 -0.332188 5.200000
4.747797 1.064543 -1.950130 0.440839 -0.303340 5.200000
4.569616 0.977744 -2.000000 0.465203 -0.271433 5.200000
4.391764 0.885997 -2.000000 0.486710 -0.233783 5.200000
4.215885 0.790780 -2.000000 0.505226 -0.200424 5.200000
4.041671 0.692551 -2.000000 0.521157 -0.170479 5.200000
3.868929 0.591766 -2.000000 0.534740 -0.143106 5.200000
3.697453 0.488825 -2.000000 0.546219 -0.117785 5.200000
3.527071 0.384094 -2.000000 0.555720 -0.094044 5.200000
3.357585 0.277908 -2.000000 0.563376 -0.071543 5.200000
3.188826 0.170573 -2.000000 0.569295 -0.050306 5.200000
3.020768 0.062509 -1.987830 0.572709 -0.016391 5.200000
2.856426 -0.043409 -1.916319 0.570560 0.082634 5.200000
2.697890 -0.144165 -1.840961 0.560650 0.182882 5.200000
2.544408 -0.238868 -1.765964 0.543651 0.282880 5.200000
2.395491 -0.326595 -1.690955 0.519938 0.382876 5.200000
2.250826 -0.406653 -1.615958 0.489625 0.482879 5.200000
2.110275 -0.478368 -1.540215 0.452572 0.590482 5.200000
1.973053 -0.541731 -1.474666 0.412274 0.593400 5.200000
1.840324 -0.596756 -1.399450 0.373808 0.593400 5.200000
1.712650 -0.644172 -1.324450 0.337362 0.593400 5.200000
1.590504 -0.684673 -1.249450 0.302907 0.593400 5.200000
1.474261 -0.718937 -1.174450 0.270477 0.593400 5.200000
1.364255 -0.747648 -1.099444 0.240041 0.593400 5.200000
1.260757 -0.771419 -1.024440 0.211622 0.593400 5.200000
1.164006 -0.790876 -0.949440 0.185204 0.593400 5.200000
1.074178 -0.806573 -0.874440 0.160797 0.593400 5.200000
0.991417 -0.819044 -0.799440 0.138396 0.593400 5.200000
0.915853 -0.828787 -0.724440 0.118001 0.593400 5.200000
0.847560 -0.836250 -0.649440 0.099611 0.593400 5.200000
0.786627 -0.841830 -0.574440 0.083239 0.593400 5.200000
0.733090 -0.845913 -0.499440 0.068869 0.593400 5.200000
0.686988 -0.848805 -0.424440 0.056490 0.592618 5.200000
0.648343 -0.850794 -0.349440 0.046668 0.520803 5.200000
0.617178 -0.852152 -0.274440 0.040327 0.420809 5.200000
0.593506 -0.853060 -0.199440 0.036647 0.320807 5.200000
0.577322 -0.853635 -0.124440 0.034832 0.220803 5.200000
0.568634 -0.853932 -0.049440 0.034207 0.120810 5.200000
0.567435 -0.853980 0.025560 0.034150 0.020807 5.200000
0.573736 -0.853758 0.100560 0.034047 -0.079197 5.200000
0.587532 -0.853295 0.175560 0.033314 -0.179200 5.200000
0.608832 -0.852609 0.250560 0.031310 -0.279193 5.200000
0.637618 -0.851753 0.325560 0.027369 -0.379197 5.200000
0.673072 -0.850893 0.350689 0.020912 -0.479199 5.200000
0.704522 -0.850353 0.276690 0.013633 -0.585675 5.200000
0.728439 -0.850098 0.201690 0.007257 -0.593400 5.200000
0.744865 -0.850015 0.126690 0.002862 -0.593400 5.200000
