# Supplementary material for: Automatic Parking Controller with a Twin Artificial Neural Network Architecture
Source: Hindawi journal article supplement (doi:10.1155/2019/4801985), 2019-01-01
Supplement: f1 [file 4801985.f1.zip › data/data_233.txt]

6.700000 1.700000 0.000000 0.000000 0.000000 5.200000
6.696302 1.700000 -0.075002 0.000059 -0.043947 5.200000
6.685001 1.700000 -0.150004 0.000430 -0.094202 5.200000
6.666252 1.699982 -0.224995 0.001427 -0.145157 5.200000
6.640005 1.699920 -0.299997 0.003356 -0.197370 5.200000
6.606249 1.699757 -0.374999 0.006585 -0.251505 5.200000
6.565001 1.699381 -0.450001 0.011477 -0.308646 5.200000
6.516255 1.698659 -0.525004 0.018521 -0.370861 5.200000
6.460020 1.697355 -0.599995 0.028326 -0.442956 5.200000
6.396313 1.695125 -0.674997 0.041939 -0.527507 5.200000
6.325150 1.691517 -0.749999 0.059698 -0.557557 5.200000
6.246597 1.686011 -0.825001 0.080402 -0.574603 5.200000
6.160713 1.678101 -0.900002 0.103303 -0.573930 5.200000
6.067592 1.667279 -0.974999 0.128178 -0.574321 5.200000
5.967364 1.652985 -1.049996 0.155054 -0.575520 5.200000
5.860173 1.634646 -1.124998 0.183903 -0.574607 5.200000
5.746233 1.611633 -1.200000 0.214789 -0.574861 5.200000
5.625779 1.583279 -1.275002 0.247619 -0.574485 5.200000
5.499115 1.548904 -1.349994 0.282428 -0.573371 5.200000
5.366606 1.507789 -1.424996 0.319255 -0.574236 5.200000
5.228673 1.459204 -1.499997 0.358092 -0.576818 5.200000
5.085810 1.402407 -1.574999 0.398872 -0.574798 5.200000
4.938601 1.336621 -1.650001 0.441585 -0.568994 5.200000
4.787573 1.261376 -1.724998 0.481543 -0.491656 5.200000
4.632869 1.176959 -1.799995 0.516213 -0.413880 5.200000
4.474468 1.083831 -1.874997 0.545629 -0.339605 5.200000
4.312290 0.982476 -1.950004 0.570578 -0.278158 5.200000
4.146641 0.873615 -2.000000 0.591225 -0.216696 5.200000
3.981435 0.760707 -2.000000 0.606815 -0.153601 5.200000
3.817804 0.645716 -2.000000 0.617512 -0.095911 5.200000
3.655147 0.529344 -2.000000 0.623729 -0.041212 5.200000
3.492963 0.412306 -2.000000 0.625472 0.005523 5.200000
3.330720 0.295359 -2.000000 0.622649 0.054444 5.200000
3.167872 0.179255 -2.000000 0.615302 0.110283 5.200000
3.003921 0.064723 -1.987481 0.603408 0.166636 5.200000
2.842476 -0.044732 -1.913044 0.587440 0.218284 5.200000
2.685411 -0.147217 -1.838043 0.568043 0.269145 5.200000
2.532581 -0.242414 -1.763040 0.545498 0.318154 5.200000
2.383977 -0.330107 -1.688049 0.519908 0.392008 5.200000
2.239538 -0.409971 -1.613047 0.488915 0.491903 5.200000
2.099140 -0.481431 -1.537976 0.451248 0.593333 5.200000
1.962416 -0.544323 -1.467543 0.410986 0.593400 5.200000
1.830260 -0.598940 -1.392532 0.372705 0.593400 5.200000
1.703195 -0.645976 -1.317524 0.336435 0.593400 5.200000
1.581667 -0.686162 -1.242528 0.302176 0.593400 5.200000
1.466065 -0.720158 -1.167532 0.269929 0.593400 5.200000
1.356718 -0.748641 -1.092524 0.239682 0.593400 5.200000
1.253884 -0.772233 -1.017527 0.211440 0.593400 5.200000
1.157810 -0.791540 -0.942530 0.185206 0.593400 5.200000
1.068661 -0.807129 -0.867528 0.160984 0.593400 5.200000
0.986591 -0.819520 -0.792527 0.138773 0.593400 5.200000
0.911715 -0.829214 -0.717530 0.118562 0.593400 5.200000
0.844116 -0.836636 -0.642530 0.100359 0.593400 5.200000
0.783882 -0.842217 -0.567526 0.084173 0.593400 5.200000
0.731032 -0.846297 -0.492529 0.069986 0.593400 5.200000
0.685626 -0.849200 -0.417531 0.057812 0.590929 5.200000
0.647677 -0.851209 -0.342526 0.048603 0.495040 5.200000
0.617204 -0.852601 -0.267529 0.042793 0.395041 5.200000
0.594224 -0.853543 -0.192532 0.039480 0.295043 5.200000
0.578724 -0.854146 -0.117525 0.037908 0.195033 5.200000
0.570700 -0.854446 -0.042528 0.037425 0.095035 5.200000
0.570271 -0.854466 0.032469 0.037390 -0.004964 5.200000
0.577235 -0.854206 0.107474 0.037210 -0.104963 5.200000
0.591713 -0.853669 0.182472 0.036281 -0.204962 5.200000
0.613696 -0.852897 0.257469 0.033979 -0.304960 5.200000
0.643175 -0.851956 0.332473 0.029606 -0.404962 5.200000
0.679358 -0.851004 0.364157 0.022563 -0.504961 5.200000
0.711813 -0.850398 0.286220 0.014618 -0.580401 5.200000
0.736686 -0.850118 0.211224 0.007958 -0.593400 5.200000
0.754054 -0.850019 0.136222 0.003309 -0.593400 5.200000
