# Supplementary material for: Automatic Parking Controller with a Twin Artificial Neural Network Architecture
Source: Hindawi journal article supplement (doi:10.1155/2019/4801985), 2019-01-01
Supplement: f1 [file 4801985.f1.zip › data/data_234.txt]

6.800000 1.700000 0.000000 0.000000 0.000000 5.200000
6.796305 1.700000 -0.075000 0.000057 -0.039609 5.200000
6.784987 1.700000 -0.150001 0.000407 -0.086286 5.200000
6.766260 1.699983 -0.224996 0.001328 -0.133357 5.200000
6.739995 1.699924 -0.300002 0.003124 -0.181183 5.200000
6.706258 1.699774 -0.374997 0.006099 -0.230123 5.200000
6.664995 1.699433 -0.450003 0.010589 -0.280699 5.200000
6.616267 1.698766 -0.524998 0.016975 -0.333793 5.200000
6.560015 1.697573 -0.600003 0.025716 -0.391059 5.200000
6.496305 1.695572 -0.675000 0.037376 -0.458577 5.200000
6.425117 1.692372 -0.749995 0.052903 -0.520077 5.200000
6.346528 1.687467 -0.825002 0.072099 -0.545969 5.200000
6.260575 1.680298 -0.899996 0.094358 -0.572781 5.200000
6.167365 1.670323 -0.975003 0.119211 -0.574275 5.200000
6.067003 1.656920 -1.049997 0.146076 -0.574386 5.200000
5.959661 1.639552 -1.125004 0.174927 -0.573979 5.200000
5.845507 1.617550 -1.199999 0.205772 -0.573791 5.200000
5.724815 1.590297 -1.274996 0.238611 -0.574779 5.200000
5.597838 1.557057 -1.350000 0.273436 -0.575045 5.200000
5.464970 1.517143 -1.424997 0.310215 -0.572715 5.200000
5.326596 1.469800 -1.500001 0.349013 -0.572483 5.200000
5.183237 1.414302 -1.574996 0.389856 -0.577701 5.200000
5.035391 1.349939 -1.649999 0.430229 -0.522706 5.200000
4.883354 1.276748 -1.724998 0.465956 -0.443852 5.200000
4.727203 1.195029 -1.799999 0.497304 -0.381859 5.200000
4.566988 1.105073 -1.874999 0.525061 -0.326643 5.200000
4.402705 1.007124 -1.953164 0.549393 -0.274219 5.200000
4.234688 0.901755 -1.991813 0.570071 -0.219800 5.200000
4.067294 0.792420 -2.000000 0.586223 -0.163132 5.200000
3.901384 0.680728 -2.000000 0.597986 -0.111289 5.200000
3.736565 0.567441 -2.000000 0.605722 -0.062446 5.200000
3.572409 0.453193 -2.000000 0.609710 -0.016552 5.200000
3.408483 0.338614 -2.000000 0.609638 0.017928 5.200000
3.244299 0.224406 -2.000000 0.605257 0.065100 5.200000
3.079309 0.111156 -1.997299 0.597188 0.114069 5.200000
2.914967 0.000733 -1.946268 0.585322 0.159198 5.200000
2.755114 -0.103587 -1.871301 0.570472 0.200756 5.200000
2.599940 -0.201315 -1.796295 0.552998 0.250129 5.200000
2.449349 -0.292165 -1.721299 0.531542 0.347562 5.200000
2.303077 -0.375569 -1.646304 0.503464 0.447561 5.200000
2.160916 -0.450793 -1.571070 0.468739 0.552260 5.200000
2.022513 -0.517504 -1.500899 0.428595 0.593400 5.200000
1.888258 -0.575693 -1.425785 0.389431 0.593400 5.200000
1.758879 -0.626010 -1.350778 0.352269 0.593400 5.200000
1.634840 -0.669146 -1.275781 0.317119 0.593400 5.200000
1.516569 -0.705806 -1.200784 0.283979 0.593400 5.200000
1.404410 -0.736654 -1.125779 0.252842 0.593400 5.200000
1.298658 -0.762334 -1.050781 0.223716 0.593400 5.200000
1.199561 -0.783476 -0.975784 0.196590 0.593400 5.200000
1.107327 -0.800638 -0.900788 0.171476 0.593400 5.200000
1.022093 -0.814388 -0.825780 0.148372 0.593400 5.200000
0.944023 -0.825222 -0.750783 0.127275 0.593400 5.200000
0.873186 -0.833596 -0.675787 0.108185 0.593400 5.200000
0.809677 -0.839950 -0.600779 0.091099 0.593400 5.200000
0.753550 -0.844651 -0.525783 0.076027 0.593400 5.200000
0.704837 -0.848039 -0.450786 0.062951 0.593400 5.200000
0.663581 -0.850412 -0.375778 0.052198 0.540303 5.200000
0.629794 -0.852048 -0.300782 0.045013 0.439377 5.200000
0.603494 -0.853171 -0.225786 0.040688 0.339377 5.200000
0.584679 -0.853916 -0.150788 0.038440 0.239377 5.200000
0.573359 -0.854349 -0.075782 0.037547 0.139379 5.200000
0.569520 -0.854490 -0.000785 0.037380 0.039380 5.200000
0.573203 -0.854355 0.074212 0.037343 -0.060619 5.200000
0.584364 -0.853945 0.149219 0.036824 -0.160618 5.200000
0.603018 -0.853267 0.224215 0.035215 -0.260617 5.200000
0.629176 -0.852385 0.299212 0.031845 -0.360626 5.200000
0.662962 -0.851408 0.379602 0.025969 -0.460624 5.200000
0.698390 -0.850622 0.319516 0.018109 -0.566302 5.200000
0.726587 -0.850212 0.244477 0.010659 -0.591184 5.200000
0.747283 -0.850046 0.169481 0.005120 -0.593400 5.200000
0.760488 -0.850003 0.094473 0.001590 -0.593400 5.200000
