# Supplementary material for: Automatic Parking Controller with a Twin Artificial Neural Network Architecture
Source: Hindawi journal article supplement (doi:10.1155/2019/4801985), 2019-01-01
Supplement: f1 [file 4801985.f1.zip › data/data_235.txt]

6.900000 1.700000 0.000000 0.000000 0.000000 5.200000
6.896319 1.700000 -0.074999 0.000056 -0.035867 5.200000
6.884983 1.700000 -0.149999 0.000386 -0.079517 5.200000
6.866264 1.699984 -0.225004 0.001252 -0.123330 5.200000
6.839990 1.699928 -0.299997 0.002930 -0.167579 5.200000
6.806262 1.699786 -0.375003 0.005700 -0.212427 5.200000
6.764992 1.699463 -0.449996 0.009862 -0.258126 5.200000
6.716260 1.698848 -0.525002 0.015731 -0.305028 5.200000
6.660007 1.697747 -0.600004 0.023679 -0.353706 5.200000
6.596297 1.695916 -0.675000 0.034111 -0.405296 5.200000
6.525095 1.693015 -0.750002 0.047581 -0.463350 5.200000
6.446485 1.688613 -0.824999 0.064764 -0.518542 5.200000
6.360466 1.682135 -0.900000 0.085696 -0.542601 5.200000
6.267171 1.673014 -0.974999 0.109690 -0.566892 5.200000
6.166687 1.660582 -1.050004 0.136456 -0.574142 5.200000
6.059175 1.644236 -1.124998 0.165303 -0.573630 5.200000
5.944825 1.623343 -1.200003 0.196146 -0.573963 5.200000
5.823860 1.597233 -1.274996 0.228990 -0.574802 5.200000
5.696582 1.565238 -1.350001 0.263797 -0.573790 5.200000
5.563329 1.526590 -1.425005 0.300584 -0.572202 5.200000
5.424517 1.480601 -1.500000 0.339493 -0.575775 5.200000
5.280598 1.426497 -1.575003 0.378823 -0.536223 5.200000
5.131916 1.364132 -1.649999 0.414729 -0.470252 5.200000
4.978635 1.293555 -1.725001 0.447299 -0.416194 5.200000
4.820912 1.214921 -1.800000 0.477014 -0.366999 5.200000
4.658860 1.128297 -1.875003 0.503970 -0.320154 5.200000
4.492544 1.033878 -1.950643 0.528105 -0.274416 5.200000
4.322437 0.932127 -1.998973 0.549155 -0.226404 5.200000
4.152704 0.826185 -2.000000 0.566161 -0.175296 5.200000
3.984651 0.717749 -2.000000 0.579175 -0.128617 5.200000
3.817815 0.607450 -2.000000 0.588552 -0.085025 5.200000
3.651840 0.495866 -2.000000 0.594545 -0.043176 5.200000
3.486347 0.383557 -2.000000 0.597380 -0.004815 5.200000
3.320952 0.271105 -2.000000 0.596414 0.021747 5.200000
3.155254 0.159103 -2.000000 0.591790 0.063615 5.200000
2.989182 0.048342 -1.977322 0.584018 0.103988 5.200000
2.826499 -0.058006 -1.905112 0.573389 0.138011 5.200000
2.669002 -0.158327 -1.829943 0.560236 0.200263 5.200000
2.516361 -0.252301 -1.754950 0.541947 0.302704 5.200000
2.368183 -0.339112 -1.679944 0.516888 0.402695 5.200000
2.224181 -0.418117 -1.604943 0.485170 0.502698 5.200000
2.084179 -0.488649 -1.530571 0.446911 0.593400 5.200000
1.947916 -0.550603 -1.459428 0.406756 0.593400 5.200000
1.816286 -0.604370 -1.384431 0.368692 0.593400 5.200000
1.689797 -0.650630 -1.309425 0.332639 0.593400 5.200000
1.568892 -0.690118 -1.234428 0.298597 0.593400 5.200000
1.453949 -0.723487 -1.159431 0.266566 0.593400 5.200000
1.345294 -0.751414 -1.084424 0.236537 0.593400 5.200000
1.243178 -0.774516 -1.009427 0.208510 0.593400 5.200000
1.147846 -0.793392 -0.934431 0.182493 0.593400 5.200000
1.059451 -0.808615 -0.859426 0.158488 0.593400 5.200000
0.978156 -0.820690 -0.784427 0.136494 0.593400 5.200000
0.904061 -0.830119 -0.709430 0.116500 0.593400 5.200000
0.837252 -0.837323 -0.634428 0.098512 0.593400 5.200000
0.777815 -0.842724 -0.559426 0.082543 0.593400 5.200000
0.725765 -0.846662 -0.484430 0.068573 0.593400 5.200000
0.681165 -0.849456 -0.409429 0.056629 0.583626 5.200000
0.644024 -0.851386 -0.334426 0.047830 0.484239 5.200000
0.614362 -0.852722 -0.259429 0.042329 0.384241 5.200000
0.592194 -0.853623 -0.184432 0.039242 0.284242 5.200000
0.577515 -0.854192 -0.109425 0.037818 0.184234 5.200000
0.570360 -0.854458 -0.034429 0.037411 0.084235 5.200000
0.570581 -0.854455 0.040568 0.037389 -0.015764 5.200000
0.578420 -0.854162 0.115575 0.037161 -0.115763 5.200000
0.593719 -0.853595 0.190572 0.036113 -0.215763 5.200000
0.616518 -0.852801 0.265569 0.033619 -0.315761 5.200000
0.646810 -0.851850 0.340575 0.028979 -0.415761 5.200000
0.683280 -0.850916 0.353873 0.021694 -0.515760 5.200000
0.714864 -0.850353 0.278121 0.013793 -0.581557 5.200000
0.738931 -0.850100 0.203124 0.007357 -0.593400 5.200000
0.755496 -0.850015 0.128120 0.002924 -0.593400 5.200000
