# Supplementary material for: Automatic Parking Controller with a Twin Artificial Neural Network Architecture
Source: Hindawi journal article supplement (doi:10.1155/2019/4801985), 2019-01-01
Supplement: f1 [file 4801985.f1.zip › data/data_236.txt]

7.000000 1.700000 0.000000 -0.000000 -0.000000 5.200000
6.996322 1.700000 -0.074997 0.000051 -0.032946 5.200000
6.984978 1.700000 -0.150004 0.000364 -0.074284 5.200000
6.966271 1.699985 -0.225002 0.001189 -0.115626 5.200000
6.939990 1.699932 -0.299999 0.002783 -0.157215 5.200000
6.906263 1.699798 -0.374998 0.005390 -0.199109 5.200000
6.864998 1.699492 -0.450004 0.009316 -0.241426 5.200000
6.816264 1.698911 -0.525001 0.014807 -0.284284 5.200000
6.760009 1.697879 -0.599998 0.022212 -0.327884 5.200000
6.696292 1.696159 -0.674996 0.031844 -0.372539 5.200000
6.625085 1.693466 -0.750003 0.044097 -0.418790 5.200000
6.546440 1.689405 -0.825000 0.059423 -0.468572 5.200000
6.460399 1.683487 -0.899997 0.078320 -0.508321 5.200000
6.367019 1.675118 -0.975004 0.100555 -0.532342 5.200000
6.266424 1.663703 -1.050002 0.125921 -0.557644 5.200000
6.158740 1.648508 -1.124999 0.154457 -0.573804 5.200000
6.044170 1.628870 -1.199998 0.185277 -0.573320 5.200000
5.922932 1.604072 -1.275004 0.218106 -0.573207 5.200000
5.795318 1.573464 -1.350001 0.252938 -0.575067 5.200000
5.661641 1.536268 -1.424998 0.289803 -0.574471 5.200000
5.522328 1.491816 -1.500006 0.327588 -0.546825 5.200000
5.377688 1.439698 -1.575003 0.363273 -0.492525 5.200000
5.227957 1.379839 -1.650000 0.396551 -0.445576 5.200000
5.073372 1.312213 -1.724997 0.427639 -0.402006 5.200000
4.914090 1.236749 -1.800003 0.456572 -0.360170 5.200000
4.750295 1.153510 -1.875002 0.483264 -0.319247 5.200000
4.582055 1.062515 -1.951534 0.507616 -0.279020 5.200000
4.409882 0.964226 -1.999200 0.529279 -0.236039 5.200000
4.238172 0.861605 -2.000000 0.547287 -0.188856 5.200000
4.068170 0.756263 -2.000000 0.561603 -0.146247 5.200000
3.899514 0.648771 -2.000000 0.572626 -0.106794 5.200000
3.731873 0.539687 -2.000000 0.580577 -0.069482 5.200000
3.564950 0.429524 -2.000000 0.585611 -0.033349 5.200000
3.398428 0.318751 -2.000000 0.587872 -0.002832 5.200000
3.231965 0.207894 -2.000000 0.586781 0.019103 5.200000
3.065123 0.097410 -1.994019 0.582498 0.055073 5.200000
2.899922 -0.010661 -1.939906 0.575673 0.087146 5.200000
2.739970 -0.113509 -1.864030 0.566269 0.155233 5.200000
2.585153 -0.210418 -1.789033 0.551161 0.257250 5.200000
2.434995 -0.300594 -1.714037 0.529096 0.357250 5.200000
2.289124 -0.383223 -1.639029 0.500403 0.457252 5.200000
2.147360 -0.457621 -1.563635 0.464976 0.565425 5.200000
2.009307 -0.523506 -1.493846 0.424713 0.593400 5.200000
1.875501 -0.580901 -1.418518 0.385743 0.593400 5.200000
1.746622 -0.630489 -1.343510 0.348776 0.593400 5.200000
1.623124 -0.672968 -1.268514 0.313820 0.593400 5.200000
1.505430 -0.709036 -1.193517 0.280875 0.593400 5.200000
1.393880 -0.739358 -1.118510 0.249931 0.593400 5.200000
1.288760 -0.764570 -1.043514 0.220999 0.593400 5.200000
1.190320 -0.785304 -0.968517 0.194069 0.593400 5.200000
1.098759 -0.802112 -0.893520 0.169149 0.593400 5.200000
1.014212 -0.815556 -0.818513 0.146240 0.593400 5.200000
0.936837 -0.826135 -0.743516 0.125335 0.593400 5.200000
0.866706 -0.834293 -0.668520 0.106440 0.593400 5.200000
0.803913 -0.840473 -0.593512 0.089552 0.593400 5.200000
0.748501 -0.845032 -0.518516 0.074672 0.593400 5.200000
0.700510 -0.848309 -0.443519 0.061783 0.593400 5.200000
0.659976 -0.850597 -0.368511 0.051350 0.530544 5.200000
0.626913 -0.852177 -0.293515 0.044482 0.429688 5.200000
0.601340 -0.853259 -0.218518 0.040391 0.329689 5.200000
0.583253 -0.853971 -0.143519 0.038303 0.229686 5.200000
0.572660 -0.854375 -0.068515 0.037512 0.129688 5.200000
0.569573 -0.854488 0.006482 0.037381 0.029690 5.200000
0.573926 -0.854328 0.081480 0.037326 -0.070309 5.200000
0.585827 -0.853891 0.156486 0.036729 -0.170308 5.200000
0.605214 -0.853191 0.231483 0.034980 -0.270307 5.200000
0.632102 -0.852292 0.306479 0.031402 -0.370316 5.200000
0.666540 -0.851317 0.383437 0.025256 -0.470315 5.200000
0.701450 -0.850569 0.312214 0.017340 -0.573661 5.200000
0.728922 -0.850188 0.237210 0.010035 -0.592871 5.200000
0.748894 -0.850037 0.162214 0.004689 -0.593400 5.200000
0.761380 -0.850001 0.087206 0.001352 -0.593400 5.200000
