# Supplementary material for: Automatic Parking Controller with a Twin Artificial Neural Network Architecture
Source: Hindawi journal article supplement (doi:10.1155/2019/4801985), 2019-01-01
Supplement: f1 [file 4801985.f1.zip › data/data_237.txt]

7.100000 1.700000 0.000000 0.000000 0.000000 5.200000
7.096329 1.700000 -0.075001 0.000049 -0.030634 5.200000
7.084974 1.700000 -0.150001 0.000353 -0.070180 5.200000
7.066271 1.699985 -0.224995 0.001137 -0.109640 5.200000
7.039984 1.699936 -0.300002 0.002666 -0.149217 5.200000
7.006264 1.699809 -0.374996 0.005160 -0.188951 5.200000
6.964996 1.699521 -0.450003 0.008896 -0.228846 5.200000
6.916261 1.698958 -0.524997 0.014119 -0.268950 5.200000
6.860013 1.697974 -0.599998 0.021123 -0.309294 5.200000
6.796280 1.696345 -0.674998 0.030202 -0.349903 5.200000
6.725084 1.693794 -0.750001 0.041656 -0.390857 5.200000
6.646421 1.689969 -0.824999 0.055851 -0.432603 5.200000
6.560360 1.684428 -0.900003 0.073104 -0.469708 5.200000
6.466922 1.676637 -0.975000 0.093445 -0.493935 5.200000
6.366244 1.666040 -1.049995 0.116703 -0.518655 5.200000
6.258410 1.651962 -1.125001 0.143120 -0.543375 5.200000
6.143601 1.633688 -1.199996 0.172963 -0.568386 5.200000
6.022076 1.610407 -1.275002 0.205742 -0.574088 5.200000
5.894075 1.581358 -1.349998 0.240625 -0.577293 5.200000
5.759968 1.545863 -1.425000 0.276603 -0.551614 5.200000
5.620004 1.503414 -1.499997 0.311570 -0.510496 5.200000
5.474499 1.453817 -1.575002 0.345100 -0.471454 5.200000
5.323668 1.396791 -1.649998 0.377128 -0.433439 5.200000
5.167765 1.332236 -1.725004 0.407554 -0.396068 5.200000
5.006996 1.260014 -1.799999 0.436252 -0.359129 5.200000
4.841532 1.180094 -1.874995 0.463087 -0.322476 5.200000
4.671508 1.092496 -1.952403 0.487915 -0.286102 5.200000
4.497457 0.997522 -1.993310 0.510412 -0.246452 5.200000
4.323921 0.898111 -2.000000 0.529475 -0.202893 5.200000
4.152134 0.795684 -2.000000 0.545132 -0.163422 5.200000
3.981810 0.690868 -2.000000 0.557704 -0.127148 5.200000
3.812658 0.584150 -2.000000 0.567451 -0.093187 5.200000
3.644407 0.476013 -2.000000 0.574565 -0.060841 5.200000
3.476799 0.366902 -2.000000 0.579150 -0.029427 5.200000
3.309552 0.257219 -2.000000 0.581303 -0.003515 5.200000
3.142365 0.147424 -1.999779 0.580523 0.012586 5.200000
2.975407 0.038292 -1.972815 0.576930 0.039002 5.200000
2.812797 -0.066928 -1.898491 0.571014 0.110901 5.200000
2.655687 -0.166681 -1.823496 0.559012 0.211299 5.200000
2.503447 -0.260057 -1.748490 0.540052 0.311297 5.200000
2.355635 -0.346228 -1.673495 0.514419 0.411305 5.200000
2.211988 -0.424518 -1.598498 0.482126 0.511302 5.200000
2.072293 -0.494323 -1.524930 0.443407 0.593400 5.200000
1.936405 -0.555538 -1.452979 0.403404 0.593400 5.200000
1.805200 -0.608632 -1.377980 0.365512 0.593400 5.200000
1.679175 -0.654281 -1.302975 0.329633 0.593400 5.200000
1.558770 -0.693217 -1.227978 0.295764 0.593400 5.200000
1.444356 -0.726091 -1.152981 0.263905 0.593400 5.200000
1.336254 -0.753579 -1.077975 0.234049 0.593400 5.200000
1.234712 -0.776297 -1.002978 0.206194 0.593400 5.200000
1.139970 -0.794836 -0.927981 0.180350 0.593400 5.200000
1.052178 -0.809770 -0.852975 0.156517 0.593400 5.200000
0.971501 -0.821600 -0.777977 0.134696 0.593400 5.200000
0.898027 -0.830821 -0.702980 0.114876 0.593400 5.200000
0.831848 -0.837855 -0.627976 0.097058 0.593400 5.200000
0.773045 -0.843116 -0.552977 0.081261 0.593400 5.200000
0.721633 -0.846944 -0.477980 0.067465 0.593400 5.200000
0.677673 -0.849652 -0.402977 0.055710 0.575636 5.200000
0.641175 -0.851522 -0.327976 0.047239 0.475638 5.200000
0.612157 -0.852814 -0.252979 0.041976 0.375640 5.200000
0.590630 -0.853684 -0.177983 0.039063 0.275641 5.200000
0.576592 -0.854227 -0.102975 0.037751 0.175635 5.200000
0.570109 -0.854468 -0.027979 0.037402 0.075636 5.200000
0.570934 -0.854442 0.047018 0.037386 -0.024364 5.200000
0.579428 -0.854125 0.122025 0.037114 -0.124363 5.200000
0.595374 -0.853536 0.197022 0.035968 -0.224362 5.200000
0.618820 -0.852724 0.272018 0.033318 -0.324362 5.200000
0.649761 -0.851766 0.347110 0.028459 -0.424361 5.200000
0.686307 -0.850851 0.346666 0.021007 -0.524360 5.200000
0.717224 -0.850320 0.271671 0.013158 -0.582678 5.200000
0.740647 -0.850087 0.196674 0.006897 -0.593400 5.200000
0.756571 -0.850012 0.121669 0.002636 -0.593400 5.200000
