# Supplementary material for: Automatic Parking Controller with a Twin Artificial Neural Network Architecture
Source: Hindawi journal article supplement (doi:10.1155/2019/4801985), 2019-01-01
Supplement: f1 [file 4801985.f1.zip › data/data_238.txt]

7.200000 1.700000 0.000000 0.000000 0.000000 5.200000
7.196336 1.700000 -0.074998 0.000048 -0.028869 5.200000
7.184976 1.700000 -0.149997 0.000342 -0.067060 5.200000
7.166272 1.699986 -0.225001 0.001101 -0.105124 5.200000
7.139988 1.699940 -0.300002 0.002581 -0.143230 5.200000
7.106257 1.699808 -0.374999 0.004984 -0.181384 5.200000
7.065005 1.699538 -0.450002 0.008583 -0.219579 5.200000
7.016245 1.698994 -0.525005 0.013614 -0.257794 5.200000
6.960018 1.698046 -0.599999 0.020336 -0.295998 5.200000
6.896273 1.696476 -0.675001 0.029018 -0.334112 5.200000
6.825085 1.694033 -0.749998 0.039939 -0.372073 5.200000
6.746408 1.690368 -0.825000 0.053397 -0.409287 5.200000
6.660319 1.685078 -0.900004 0.069562 -0.436106 5.200000
6.566867 1.677703 -0.975001 0.088323 -0.460824 5.200000
6.466104 1.667699 -1.050000 0.109846 -0.485543 5.200000
6.358176 1.654478 -1.125005 0.134347 -0.510262 5.200000
6.243191 1.637320 -1.199997 0.162076 -0.535000 5.200000
6.121397 1.615486 -1.275002 0.193206 -0.557196 5.200000
5.993032 1.588130 -1.350001 0.226396 -0.546320 5.200000
5.858375 1.554702 -1.424999 0.259986 -0.522107 5.200000
5.717703 1.514736 -1.500003 0.293230 -0.492752 5.200000
5.571271 1.467872 -1.575004 0.325733 -0.460932 5.200000
5.419350 1.413849 -1.650001 0.357180 -0.428079 5.200000
5.262176 1.352423 -1.725004 0.387392 -0.394753 5.200000
5.099986 1.283470 -1.799997 0.416161 -0.361274 5.200000
4.932969 1.206870 -1.875000 0.443345 -0.327775 5.200000
4.761286 1.122593 -1.950394 0.468784 -0.294432 5.200000
4.585572 1.030958 -2.000000 0.492123 -0.258102 5.200000
4.410217 0.934570 -2.000000 0.512300 -0.216576 5.200000
4.236754 0.835025 -2.000000 0.529200 -0.179486 5.200000
4.064848 0.732800 -2.000000 0.543226 -0.145732 5.200000
3.894256 0.628410 -2.000000 0.554620 -0.114422 5.200000
3.724732 0.522291 -2.000000 0.563574 -0.084928 5.200000
3.556042 0.414853 -2.000000 0.570237 -0.056763 5.200000
3.387941 0.306479 -2.000000 0.574685 -0.029429 5.200000
3.220222 0.197536 -2.000000 0.577080 -0.005509 5.200000
3.052649 0.088432 -1.999496 0.576898 0.007675 5.200000
2.887290 -0.018911 -1.934082 0.573967 0.060593 5.200000
2.727730 -0.121275 -1.858193 0.565418 0.165036 5.200000
2.573297 -0.217699 -1.783189 0.549688 0.265043 5.200000
2.423481 -0.307312 -1.708187 0.527090 0.365039 5.200000
2.277939 -0.389311 -1.633190 0.497901 0.465036 5.200000
2.136489 -0.463056 -1.557696 0.461912 0.575168 5.200000
1.998719 -0.528274 -1.488016 0.421606 0.593400 5.200000
1.865278 -0.585036 -1.412676 0.382791 0.593400 5.200000
1.736802 -0.634043 -1.337668 0.345981 0.593400 5.200000
1.613743 -0.675999 -1.262672 0.311181 0.593400 5.200000
1.496517 -0.711594 -1.187675 0.278394 0.593400 5.200000
1.385460 -0.741496 -1.112668 0.247606 0.593400 5.200000
1.280851 -0.766337 -1.037671 0.218830 0.593400 5.200000
1.182941 -0.786745 -0.962674 0.192056 0.593400 5.200000
1.091920 -0.803273 -0.887678 0.167292 0.593400 5.200000
1.007927 -0.816476 -0.812671 0.144540 0.593400 5.200000
0.931112 -0.826852 -0.737674 0.123790 0.593400 5.200000
0.861549 -0.834839 -0.662678 0.105052 0.593400 5.200000
0.799331 -0.840883 -0.587670 0.088322 0.593400 5.200000
0.744492 -0.845330 -0.512673 0.073597 0.593400 5.200000
0.697082 -0.848519 -0.437677 0.060861 0.593400 5.200000
0.657128 -0.850742 -0.362669 0.050693 0.522483 5.200000
0.624646 -0.852278 -0.287673 0.044072 0.421899 5.200000
0.599656 -0.853327 -0.212676 0.040165 0.321900 5.200000
0.582149 -0.854014 -0.137675 0.038201 0.221895 5.200000
0.572127 -0.854394 -0.062672 0.037487 0.121897 5.200000
0.569672 -0.854485 0.012324 0.037383 0.021899 5.200000
0.574581 -0.854304 0.087324 0.037306 -0.078100 5.200000
0.587064 -0.853845 0.162328 0.036642 -0.178099 5.200000
0.607035 -0.853127 0.237325 0.034778 -0.278097 5.200000
0.634506 -0.852218 0.312323 0.031029 -0.378106 5.200000
0.669395 -0.851246 0.383049 0.024676 -0.478105 5.200000
0.703852 -0.850529 0.306365 0.016728 -0.576429 5.200000
0.730740 -0.850171 0.231368 0.009549 -0.593398 5.200000
0.750128 -0.850032 0.156371 0.004359 -0.593400 5.200000
0.762030 -0.850000 0.081364 0.001178 -0.593400 5.200000
