# Supplementary material for: Automatic Parking Controller with a Twin Artificial Neural Network Architecture
Source: Hindawi journal article supplement (doi:10.1155/2019/4801985), 2019-01-01
Supplement: f1 [file 4801985.f1.zip › data/data_239.txt]

6.800000 1.800000 0.000000 0.000000 0.000000 5.200000
6.796311 1.800000 -0.075003 0.000059 -0.043684 5.200000
6.784984 1.800000 -0.150005 0.000429 -0.093803 5.200000
6.766264 1.799980 -0.225002 0.001424 -0.144642 5.200000
6.739993 1.799917 -0.300000 0.003361 -0.196735 5.200000
6.706260 1.799755 -0.375003 0.006565 -0.250768 5.200000
6.664992 1.799386 -0.450005 0.011458 -0.307792 5.200000
6.616266 1.798665 -0.525001 0.018478 -0.369853 5.200000
6.560019 1.797358 -0.600001 0.028262 -0.443534 5.200000
6.496322 1.795134 -0.675004 0.041870 -0.529583 5.200000
6.425152 1.791526 -0.750004 0.059614 -0.552873 5.200000
6.346607 1.786043 -0.825001 0.080188 -0.574073 5.200000
6.260705 1.778139 -0.900001 0.103084 -0.574014 5.200000
6.167593 1.767347 -0.975005 0.127960 -0.574197 5.200000
6.067347 1.753074 -1.050003 0.154826 -0.574197 5.200000
5.960166 1.734762 -1.125000 0.183665 -0.573765 5.200000
5.846204 1.711769 -1.200002 0.214523 -0.574528 5.200000
5.725748 1.683450 -1.275005 0.247345 -0.573493 5.200000
5.599078 1.649101 -1.350003 0.282167 -0.573865 5.200000
5.466553 1.608029 -1.425000 0.319001 -0.575480 5.200000
5.328604 1.559486 -1.500003 0.357787 -0.574240 5.200000
5.185733 1.502717 -1.575005 0.398533 -0.570858 5.200000
5.038506 1.436988 -1.650002 0.441337 -0.573108 5.200000
4.887496 1.361670 -1.725000 0.482734 -0.509306 5.200000
4.732966 1.276957 -1.800003 0.518945 -0.431266 5.200000
4.574897 1.183266 -1.875005 0.549801 -0.354202 5.200000
4.413183 1.081130 -1.952750 0.575944 -0.292044 5.200000
4.248096 0.971218 -1.989841 0.597794 -0.230222 5.200000
4.083823 0.857239 -2.000000 0.614511 -0.167485 5.200000
3.921150 0.740879 -2.000000 0.626394 -0.110329 5.200000
3.759595 0.622975 -2.000000 0.633783 -0.056532 5.200000
3.598685 0.504199 -2.000000 0.637115 -0.008522 5.200000
3.437875 0.385283 -2.000000 0.635737 0.035551 5.200000
3.276645 0.266938 -2.000000 0.629869 0.088348 5.200000
3.114470 0.149884 -1.999786 0.619785 0.144507 5.200000
2.951702 0.035414 -1.962983 0.605194 0.198325 5.200000
2.792484 -0.072675 -1.886445 0.586902 0.248996 5.200000
2.637468 -0.173465 -1.811443 0.565352 0.299414 5.200000
2.486557 -0.266694 -1.736440 0.540757 0.349880 5.200000
2.339752 -0.352203 -1.661443 0.513110 0.420369 5.200000
2.197043 -0.429683 -1.586445 0.480241 0.522597 5.200000
2.058128 -0.498713 -1.516442 0.441003 0.593400 5.200000
1.922827 -0.559304 -1.445043 0.401240 0.593400 5.200000
1.792241 -0.611826 -1.370044 0.363566 0.593400 5.200000
1.666879 -0.656977 -1.295044 0.327900 0.593400 5.200000
1.547171 -0.695469 -1.220044 0.294239 0.593400 5.200000
1.433471 -0.727964 -1.145045 0.262587 0.593400 5.200000
1.326104 -0.755129 -1.070045 0.232948 0.593400 5.200000
1.225325 -0.777577 -0.995045 0.205311 0.593400 5.200000
1.131343 -0.795893 -0.920046 0.179677 0.593400 5.200000
1.044325 -0.810637 -0.845047 0.156054 0.593400 5.200000
0.964418 -0.822324 -0.770047 0.134444 0.593400 5.200000
0.891732 -0.831438 -0.695048 0.114836 0.593400 5.200000
0.826348 -0.838392 -0.620048 0.097239 0.593400 5.200000
0.768333 -0.843594 -0.545040 0.081645 0.593400 5.200000
0.717716 -0.847391 -0.470042 0.068057 0.593400 5.200000
0.674551 -0.850082 -0.395043 0.056531 0.574612 5.200000
0.638841 -0.851945 -0.320044 0.048256 0.474610 5.200000
0.610621 -0.853240 -0.245045 0.043148 0.374616 5.200000
0.589888 -0.854103 -0.170047 0.040346 0.274613 5.200000
0.576648 -0.854627 -0.095048 0.039119 0.174614 5.200000
0.570999 -0.854848 -0.020041 0.038812 0.074611 5.200000
0.572588 -0.854782 0.054959 0.038797 -0.025387 5.200000
0.581854 -0.854428 0.129959 0.038501 -0.125382 5.200000
0.598602 -0.853785 0.204958 0.037291 -0.225388 5.200000
0.622833 -0.852921 0.279957 0.034544 -0.325383 5.200000
0.654569 -0.851896 0.355242 0.029542 -0.425389 5.200000
0.691828 -0.850932 0.354614 0.021929 -0.525385 5.200000
0.723485 -0.850358 0.279024 0.013894 -0.592937 5.200000
0.747635 -0.850099 0.204025 0.007421 -0.593400 5.200000
0.764295 -0.850015 0.129025 0.002964 -0.593400 5.200000
