# Supplementary material for: Automatic Parking Controller with a Twin Artificial Neural Network Architecture
Source: Hindawi journal article supplement (doi:10.1155/2019/4801985), 2019-01-01
Supplement: f1 [file 4801985.f1.zip › data/data_240.txt]

6.900000 1.800000 0.000000 0.000000 0.000000 5.200000
6.896323 1.800000 -0.074996 0.000058 -0.039473 5.200000
6.884984 1.800000 -0.150003 0.000407 -0.086124 5.200000
6.866263 1.799982 -0.225000 0.001329 -0.133193 5.200000
6.839984 1.799921 -0.299996 0.003128 -0.181022 5.200000
6.806266 1.799770 -0.375003 0.006100 -0.230002 5.200000
6.764997 1.799428 -0.449999 0.010600 -0.280649 5.200000
6.716263 1.798759 -0.524997 0.016978 -0.333903 5.200000
6.660019 1.797563 -0.600003 0.025729 -0.391421 5.200000
6.596306 1.795571 -0.674999 0.037417 -0.457895 5.200000
6.525121 1.792361 -0.750001 0.053049 -0.529383 5.200000
6.446531 1.787426 -0.825002 0.072718 -0.557693 5.200000
6.360587 1.780191 -0.899998 0.095414 -0.573860 5.200000
6.267380 1.770095 -0.974995 0.120296 -0.573989 5.200000
6.167043 1.756608 -1.050002 0.147159 -0.573851 5.200000
6.059709 1.739103 -1.124998 0.176002 -0.573621 5.200000
5.945594 1.716995 -1.199998 0.206845 -0.574017 5.200000
5.824911 1.689588 -1.275001 0.239675 -0.574375 5.200000
5.697985 1.656238 -1.349997 0.274477 -0.573337 5.200000
5.565149 1.616168 -1.425002 0.311282 -0.572951 5.200000
5.426840 1.568704 -1.500001 0.350110 -0.575476 5.200000
5.283520 1.513027 -1.574997 0.390989 -0.575362 5.200000
5.135769 1.448484 -1.649994 0.432126 -0.535631 5.200000
4.983922 1.374899 -1.725001 0.469065 -0.457659 5.200000
4.828070 1.292613 -1.799997 0.501426 -0.392935 5.200000
4.668264 1.201928 -1.874998 0.530076 -0.336877 5.200000
4.504533 1.103091 -1.950223 0.555266 -0.284027 5.200000
4.337302 0.996736 -2.000000 0.576786 -0.229909 5.200000
4.170559 0.886115 -2.000000 0.593805 -0.173057 5.200000
4.005546 0.773116 -2.000000 0.606378 -0.121416 5.200000
3.841738 0.658364 -2.000000 0.614988 -0.073139 5.200000
3.678698 0.542537 -2.000000 0.619791 -0.026918 5.200000
3.516005 0.426213 -2.000000 0.620730 0.009031 5.200000
3.353182 0.310074 -2.000000 0.617647 0.051010 5.200000
3.189775 0.194756 -2.000000 0.610689 0.098869 5.200000
3.025372 0.080929 -1.986790 0.599885 0.147182 5.200000
2.863096 -0.028454 -1.919880 0.585587 0.190261 5.200000
2.705424 -0.131166 -1.844278 0.568504 0.232021 5.200000
2.552255 -0.226999 -1.769282 0.549020 0.279291 5.200000
2.403530 -0.315727 -1.694286 0.525534 0.378750 5.200000
2.259045 -0.396763 -1.619278 0.495501 0.478811 5.200000
2.118634 -0.469470 -1.543401 0.458693 0.587852 5.200000
1.981523 -0.533811 -1.478266 0.418372 0.593400 5.200000
1.848807 -0.589774 -1.402886 0.379814 0.593400 5.200000
1.721103 -0.638069 -1.327887 0.343271 0.593400 5.200000
1.598871 -0.679391 -1.252888 0.308730 0.593400 5.200000
1.482494 -0.714430 -1.177889 0.276202 0.593400 5.200000
1.372323 -0.743851 -1.102890 0.245679 0.593400 5.200000
1.268634 -0.768285 -1.027892 0.217165 0.593400 5.200000
1.171645 -0.788342 -0.952884 0.190653 0.593400 5.200000
1.081561 -0.804583 -0.877884 0.166155 0.593400 5.200000
0.998532 -0.817546 -0.802885 0.143659 0.593400 5.200000
0.922675 -0.827738 -0.727885 0.123174 0.593400 5.200000
0.854078 -0.835580 -0.652886 0.104692 0.593400 5.200000
0.792826 -0.841510 -0.577888 0.088222 0.593400 5.200000
0.738966 -0.845881 -0.502887 0.073764 0.593400 5.200000
0.692530 -0.849025 -0.427887 0.061294 0.593400 5.200000
0.653554 -0.851213 -0.352888 0.051427 0.518868 5.200000
0.622057 -0.852733 -0.277888 0.045050 0.418404 5.200000
0.598037 -0.853771 -0.202888 0.041337 0.318401 5.200000
0.581515 -0.854434 -0.127889 0.039503 0.218407 5.200000
0.572458 -0.854792 -0.052884 0.038875 0.118401 5.200000
0.570912 -0.854850 0.022114 0.038800 0.018406 5.200000
0.576878 -0.854620 0.097113 0.038704 -0.081597 5.200000
0.590344 -0.854098 0.172112 0.037970 -0.181595 5.200000
0.611296 -0.853322 0.247111 0.035987 -0.281600 5.200000
0.639744 -0.852354 0.322142 0.032067 -0.381596 5.200000
0.675601 -0.851320 0.387618 0.025469 -0.481602 5.200000
0.710540 -0.850562 0.311862 0.017335 -0.583059 5.200000
0.737980 -0.850183 0.236863 0.010007 -0.593400 5.200000
0.757925 -0.850036 0.161864 0.004671 -0.593400 5.200000
0.770374 -0.850001 0.086865 0.001336 -0.593400 5.200000
