# Supplementary material for: Automatic Parking Controller with a Twin Artificial Neural Network Architecture
Source: Hindawi journal article supplement (doi:10.1155/2019/4801985), 2019-01-01
Supplement: f1 [file 4801985.f1.zip › data/data_241.txt]

7.000000 1.800000 0.000000 0.000000 0.000000 5.200000
6.996326 1.800000 -0.075000 0.000053 -0.036000 5.200000
6.984976 1.800000 -0.150000 0.000386 -0.079867 5.200000
6.966272 1.799983 -0.225000 0.001259 -0.123926 5.200000
6.939988 1.799924 -0.300000 0.002951 -0.168455 5.200000
6.906259 1.799781 -0.375000 0.005728 -0.213642 5.200000
6.864992 1.799465 -0.450000 0.009919 -0.259757 5.200000
6.816264 1.798845 -0.525000 0.015832 -0.307224 5.200000
6.760015 1.797733 -0.600000 0.023848 -0.356679 5.200000
6.696292 1.795887 -0.675000 0.034391 -0.409467 5.200000
6.625104 1.792960 -0.750000 0.048017 -0.471260 5.200000
6.546474 1.788508 -0.825000 0.065547 -0.519819 5.200000
6.460484 1.781968 -0.900000 0.086566 -0.544981 5.200000
6.367182 1.772744 -0.975000 0.110739 -0.572097 5.200000
6.266725 1.760224 -1.050000 0.137569 -0.573391 5.200000
6.159223 1.743749 -1.125000 0.166410 -0.573368 5.200000
6.044897 1.722736 -1.200000 0.197251 -0.574435 5.200000
5.923970 1.696497 -1.275000 0.230079 -0.573924 5.200000
5.796723 1.664350 -1.350000 0.264869 -0.571791 5.200000
5.663511 1.625576 -1.425000 0.301692 -0.574032 5.200000
5.524738 1.579416 -1.500000 0.340537 -0.577583 5.200000
5.380902 1.525153 -1.575000 0.380759 -0.558218 5.200000
5.232394 1.462343 -1.650000 0.418141 -0.485218 5.200000
5.079400 1.391183 -1.725000 0.451781 -0.427396 5.200000
4.922062 1.311754 -1.800000 0.482358 -0.376551 5.200000
4.760514 1.224220 -1.875000 0.510069 -0.328692 5.200000
4.594789 1.128703 -1.953798 0.534912 -0.282623 5.200000
4.425312 1.025683 -1.989010 0.556629 -0.233785 5.200000
4.256556 0.918522 -2.000000 0.574209 -0.182222 5.200000
4.089413 0.808687 -2.000000 0.587794 -0.135227 5.200000
3.923563 0.696904 -2.000000 0.597702 -0.091485 5.200000
3.758642 0.583766 -2.000000 0.604245 -0.049731 5.200000
3.594273 0.469827 -2.000000 0.607445 -0.011744 5.200000
3.430080 0.355634 -2.000000 0.607189 0.016547 5.200000
3.265632 0.241794 -2.000000 0.603213 0.055854 5.200000
3.100475 0.128823 -1.997010 0.595985 0.098064 5.200000
2.935729 0.018270 -1.952362 0.585490 0.136661 5.200000
2.775445 -0.086571 -1.877740 0.572473 0.170599 5.200000
2.620042 -0.185138 -1.802740 0.557269 0.234175 5.200000
2.469336 -0.277038 -1.727740 0.536843 0.334200 5.200000
2.322995 -0.361611 -1.652740 0.509705 0.434200 5.200000
2.180755 -0.438104 -1.577617 0.475990 0.535462 5.200000
2.042200 -0.506182 -1.509903 0.436240 0.593400 5.200000
1.907424 -0.565798 -1.436345 0.396764 0.593400 5.200000
1.777421 -0.617431 -1.361345 0.359325 0.593400 5.200000
1.652693 -0.661773 -1.286346 0.323891 0.593400 5.200000
1.533663 -0.699535 -1.211346 0.290465 0.593400 5.200000
1.420685 -0.731378 -1.136346 0.259045 0.593400 5.200000
1.314071 -0.757962 -1.061346 0.229638 0.593400 5.200000
1.214070 -0.779902 -0.986343 0.202234 0.593400 5.200000
1.120889 -0.797775 -0.911345 0.176835 0.593400 5.200000
1.034692 -0.812138 -0.836346 0.153444 0.593400 5.200000
0.955619 -0.823504 -0.761347 0.132068 0.593400 5.200000
0.883775 -0.832345 -0.686348 0.112692 0.593400 5.200000
0.819243 -0.839078 -0.611349 0.095330 0.593400 5.200000
0.762084 -0.844100 -0.536340 0.079969 0.593400 5.200000
0.712326 -0.847755 -0.461341 0.066610 0.593400 5.200000
0.670025 -0.850335 -0.386342 0.055364 0.562634 5.200000
0.635179 -0.852120 -0.311343 0.047516 0.463009 5.200000
0.607822 -0.853359 -0.236344 0.042718 0.363015 5.200000
0.587955 -0.854179 -0.161345 0.040133 0.263016 5.200000
0.575571 -0.854669 -0.086347 0.039047 0.163014 5.200000
0.570842 -0.854854 -0.011342 0.038806 0.063013 5.200000
0.573285 -0.854756 0.063658 0.038787 -0.036988 5.200000
0.583412 -0.854367 0.138657 0.038418 -0.136982 5.200000
0.601024 -0.853695 0.213657 0.037067 -0.236989 5.200000
0.626122 -0.852808 0.288657 0.034097 -0.336983 5.200000
0.658743 -0.851775 0.363343 0.028781 -0.436989 5.200000
0.695886 -0.850845 0.345324 0.020983 -0.537258 5.200000
0.726662 -0.850315 0.270325 0.013040 -0.593400 5.200000
0.749945 -0.850083 0.195326 0.006803 -0.593400 5.200000
0.765738 -0.850011 0.120326 0.002577 -0.593400 5.200000
