# Supplementary material for: Automatic Parking Controller with a Twin Artificial Neural Network Architecture
Source: Hindawi journal article supplement (doi:10.1155/2019/4801985), 2019-01-01
Supplement: f1 [file 4801985.f1.zip › data/data_242.txt]

7.100000 1.800000 0.000000 0.000000 0.000000 5.200000
7.096330 1.800000 -0.074999 0.000051 -0.033159 5.200000
7.084976 1.800000 -0.149998 0.000366 -0.074771 5.200000
7.066274 1.799984 -0.225004 0.001194 -0.116431 5.200000
7.039986 1.799928 -0.299997 0.002805 -0.158361 5.200000
7.006264 1.799792 -0.375003 0.005429 -0.200667 5.200000
6.965000 1.799494 -0.449996 0.009383 -0.243461 5.200000
6.916256 1.798906 -0.525001 0.014934 -0.286915 5.200000
6.860021 1.797857 -0.600000 0.022411 -0.331296 5.200000
6.796285 1.796122 -0.675000 0.032163 -0.377004 5.200000
6.725098 1.793412 -0.749997 0.044585 -0.424856 5.200000
6.646446 1.789291 -0.824999 0.060185 -0.480063 5.200000
6.560417 1.783296 -0.900004 0.079465 -0.509581 5.200000
6.467047 1.774820 -0.974997 0.101791 -0.534293 5.200000
6.366456 1.763261 -1.050002 0.127271 -0.559048 5.200000
6.258808 1.747934 -1.124997 0.155874 -0.573474 5.200000
6.144251 1.728114 -1.200000 0.186729 -0.573754 5.200000
6.023058 1.703158 -1.274998 0.219538 -0.573162 5.200000
5.895480 1.672340 -1.350001 0.254346 -0.572961 5.200000
5.761869 1.634982 -1.424996 0.291173 -0.574491 5.200000
5.622620 1.590299 -1.500000 0.329579 -0.562239 5.200000
5.478119 1.537786 -1.574994 0.366711 -0.508247 5.200000
5.328645 1.477342 -1.649999 0.401080 -0.457093 5.200000
5.174382 1.408929 -1.725002 0.433021 -0.411326 5.200000
5.015548 1.332572 -1.799997 0.462646 -0.368010 5.200000
4.852283 1.248264 -1.874999 0.489958 -0.326032 5.200000
4.684694 1.156121 -1.950459 0.514840 -0.284730 5.200000
4.513316 1.056561 -1.999317 0.536994 -0.240919 5.200000
4.342363 0.952560 -2.000000 0.555410 -0.193244 5.200000
4.173237 0.845807 -2.000000 0.570074 -0.150042 5.200000
4.005519 0.736857 -2.000000 0.581401 -0.110092 5.200000
3.838856 0.626302 -2.000000 0.589594 -0.072344 5.200000
3.672953 0.514605 -2.000000 0.594870 -0.035836 5.200000
3.507465 0.402292 -2.000000 0.597269 -0.003630 5.200000
3.342078 0.289831 -2.000000 0.596456 0.017416 5.200000
3.176411 0.177789 -2.000000 0.592313 0.053411 5.200000
3.010337 0.066806 -1.984336 0.585413 0.089044 5.200000
2.847274 -0.040252 -1.911780 0.576002 0.117320 5.200000
2.689547 -0.141458 -1.836569 0.564241 0.187568 5.200000
2.536757 -0.236454 -1.761576 0.546882 0.289088 5.200000
2.388492 -0.324410 -1.686571 0.522770 0.389086 5.200000
2.244414 -0.404638 -1.611572 0.492027 0.489093 5.200000
2.104396 -0.476475 -1.536201 0.454603 0.592886 5.200000
1.967666 -0.539939 -1.470265 0.414317 0.593400 5.200000
1.835439 -0.595083 -1.395175 0.375966 0.593400 5.200000
1.708276 -0.642627 -1.320176 0.339628 0.593400 5.200000
1.586631 -0.683274 -1.245177 0.305292 0.593400 5.200000
1.470876 -0.717703 -1.170178 0.272970 0.593400 5.200000
1.361358 -0.746584 -1.095179 0.242656 0.593400 5.200000
1.258350 -0.770541 -1.020181 0.214347 0.593400 5.200000
1.162064 -0.790179 -0.945175 0.188041 0.593400 5.200000
1.072697 -0.806059 -0.870175 0.163749 0.593400 5.200000
0.990401 -0.818713 -0.795176 0.141461 0.593400 5.200000
0.915289 -0.828645 -0.720176 0.121183 0.593400 5.200000
0.847447 -0.836270 -0.645176 0.102908 0.593400 5.200000
0.786953 -0.842024 -0.570177 0.086644 0.593400 5.200000
0.733853 -0.846255 -0.495178 0.072392 0.593400 5.200000
0.688181 -0.849289 -0.420178 0.060137 0.593400 5.200000
0.649969 -0.851396 -0.345179 0.050625 0.508215 5.200000
0.619241 -0.852861 -0.270179 0.044558 0.408126 5.200000
0.595987 -0.853857 -0.195180 0.041071 0.308121 5.200000
0.580228 -0.854485 -0.120180 0.039391 0.208126 5.200000
0.571909 -0.854813 -0.045173 0.038849 0.108120 5.200000
0.571218 -0.854837 0.029825 0.038800 0.008126 5.200000
0.577927 -0.854580 0.104824 0.038667 -0.091876 5.200000
0.592157 -0.854029 0.179823 0.037832 -0.191876 5.200000
0.613874 -0.853231 0.254822 0.035684 -0.291878 5.200000
0.643093 -0.852248 0.330103 0.031525 -0.391877 5.200000
0.679447 -0.851224 0.384333 0.024663 -0.491881 5.200000
0.713698 -0.850509 0.304152 0.016516 -0.586290 5.200000
0.740363 -0.850160 0.229153 0.009368 -0.593400 5.200000
0.759534 -0.850029 0.154154 0.004241 -0.593400 5.200000
0.771210 -0.850000 0.079154 0.001113 -0.593400 5.200000
