# Supplementary material for: Automatic Parking Controller with a Twin Artificial Neural Network Architecture
Source: Hindawi journal article supplement (doi:10.1155/2019/4801985), 2019-01-01
Supplement: f1 [file 4801985.f1.zip › data/data_243.txt]

7.200000 1.800000 -0.000000 0.000000 0.000000 5.200000
7.196337 1.800000 -0.075000 0.000050 -0.030851 5.200000
7.184975 1.800000 -0.150003 0.000355 -0.070661 5.200000
7.166276 1.799985 -0.224999 0.001145 -0.110431 5.200000
7.139992 1.799931 -0.300003 0.002684 -0.150334 5.200000
7.106252 1.799802 -0.375002 0.005207 -0.190434 5.200000
7.065006 1.799510 -0.449998 0.008967 -0.230750 5.200000
7.016245 1.798952 -0.525005 0.014248 -0.271355 5.200000
6.960022 1.797957 -0.600002 0.021306 -0.312298 5.200000
6.896282 1.796314 -0.674998 0.030491 -0.353678 5.200000
6.825082 1.793742 -0.750005 0.042081 -0.395652 5.200000
6.746422 1.789868 -0.825001 0.056476 -0.439216 5.200000
6.660362 1.784264 -0.899997 0.074051 -0.477265 5.200000
6.566948 1.776370 -0.975005 0.094776 -0.502185 5.200000
6.466262 1.765605 -1.050001 0.118500 -0.526906 5.200000
6.358468 1.751320 -1.124998 0.145432 -0.551796 5.200000
6.243711 1.732745 -1.200004 0.175718 -0.572211 5.200000
6.122240 1.709119 -1.275000 0.208507 -0.572120 5.200000
5.994340 1.679725 -1.350000 0.243353 -0.573931 5.200000
5.860307 1.643829 -1.425003 0.279812 -0.564403 5.200000
5.720526 1.600891 -1.499999 0.315877 -0.522923 5.200000
5.575247 1.550565 -1.575003 0.350247 -0.480456 5.200000
5.424731 1.492738 -1.650002 0.382910 -0.440440 5.200000
5.269226 1.427225 -1.724998 0.413856 -0.401699 5.200000
5.108932 1.353953 -1.800005 0.442982 -0.363719 5.200000
4.944031 1.272911 -1.875002 0.470166 -0.326211 5.200000
4.774649 1.184067 -1.952009 0.495292 -0.289260 5.200000
4.601315 1.087818 -1.997480 0.518009 -0.249181 5.200000
4.428548 0.987048 -2.000000 0.537260 -0.204548 5.200000
4.257568 0.883284 -2.000000 0.553034 -0.164451 5.200000
4.088073 0.777112 -2.000000 0.565678 -0.127634 5.200000
3.919787 0.669047 -2.000000 0.575464 -0.093156 5.200000
3.752406 0.559571 -2.000000 0.582547 -0.060299 5.200000
3.585671 0.449120 -2.000000 0.587108 -0.028353 5.200000
3.419304 0.338132 -2.000000 0.589150 -0.001553 5.200000
3.252987 0.227040 -2.000000 0.588213 0.014756 5.200000
3.086360 0.116312 -1.999829 0.584374 0.046289 5.200000
2.920866 0.007519 -1.946598 0.578258 0.074936 5.200000
2.760668 -0.096168 -1.870695 0.569771 0.141161 5.200000
2.605679 -0.194062 -1.795687 0.555659 0.243600 5.200000
2.455404 -0.285316 -1.720691 0.534568 0.343600 5.200000
2.309448 -0.369153 -1.645695 0.506818 0.443600 5.200000
2.167612 -0.444849 -1.570258 0.472443 0.547990 5.200000
2.029340 -0.512144 -1.504147 0.432419 0.593400 5.200000
1.894992 -0.570979 -1.429296 0.393158 0.593400 5.200000
1.765465 -0.621900 -1.354296 0.355908 0.593400 5.200000
1.641255 -0.665594 -1.279297 0.320662 0.593400 5.200000
1.522777 -0.702772 -1.204297 0.287427 0.593400 5.200000
1.410387 -0.734093 -1.129298 0.256194 0.593400 5.200000
1.304385 -0.760213 -1.054298 0.226976 0.593400 5.200000
1.205014 -0.781747 -0.979292 0.199760 0.593400 5.200000
1.112484 -0.799267 -0.904294 0.174551 0.593400 5.200000
1.026954 -0.813326 -0.829295 0.151349 0.593400 5.200000
0.948557 -0.824436 -0.754296 0.130160 0.593400 5.200000
0.877398 -0.833059 -0.679298 0.110974 0.593400 5.200000
0.813558 -0.839617 -0.604299 0.093800 0.593400 5.200000
0.757096 -0.844495 -0.529290 0.078630 0.593400 5.200000
0.708037 -0.848038 -0.454291 0.065460 0.593400 5.200000
0.666437 -0.850531 -0.379291 0.054468 0.553565 5.200000
0.632292 -0.852256 -0.304292 0.046950 0.453609 5.200000
0.605635 -0.853452 -0.229293 0.042393 0.353614 5.200000
0.586469 -0.854238 -0.154294 0.039977 0.253617 5.200000
0.574780 -0.854701 -0.079296 0.038997 0.153613 5.200000
0.570746 -0.854857 -0.004294 0.038803 0.053615 5.200000
0.573944 -0.854731 0.070706 0.038774 -0.046389 5.200000
0.584759 -0.854314 0.145706 0.038339 -0.146383 5.200000
0.603070 -0.853620 0.220706 0.036866 -0.246389 5.200000
0.628871 -0.852714 0.295705 0.033709 -0.346384 5.200000
0.662246 -0.851676 0.370613 0.028123 -0.446390 5.200000
0.699095 -0.850779 0.338273 0.020211 -0.548327 5.200000
0.729165 -0.850283 0.263274 0.012370 -0.593400 5.200000
0.751737 -0.850071 0.188275 0.006324 -0.593400 5.200000
0.766813 -0.850009 0.113276 0.002289 -0.593400 5.200000
