# Supplementary material for: Automatic Parking Controller with a Twin Artificial Neural Network Architecture
Source: Hindawi journal article supplement (doi:10.1155/2019/4801985), 2019-01-01
Supplement: f1 [file 4801985.f1.zip › data/data_244.txt]

5.900000 1.000000 0.000000 0.000000 0.000000 5.100000
5.896247 1.000000 -0.074999 0.000050 -0.035103 5.100000
5.885021 0.999998 -0.149997 0.000364 -0.077201 5.100000
5.866251 0.999979 -0.224996 0.001198 -0.119346 5.100000
5.839992 0.999933 -0.300003 0.002810 -0.161732 5.100000
5.806255 0.999791 -0.375004 0.005468 -0.204429 5.100000
5.765007 0.999493 -0.450002 0.009440 -0.247535 5.100000
5.716254 0.998896 -0.525001 0.015037 -0.291181 5.100000
5.660019 0.997850 -0.600000 0.022567 -0.335584 5.100000
5.596295 0.996098 -0.674999 0.032381 -0.381054 5.100000
5.525091 0.993357 -0.749997 0.044867 -0.428231 5.100000
5.446451 0.989227 -0.824995 0.060499 -0.480002 5.100000
5.360414 0.983198 -0.900006 0.079823 -0.519035 5.100000
5.267052 0.974677 -0.975004 0.102480 -0.543386 5.100000
5.166480 0.963027 -1.050002 0.128331 -0.569593 5.100000
5.058838 0.947576 -1.125001 0.157111 -0.576552 5.100000
4.944320 0.927615 -1.200000 0.187994 -0.576649 5.100000
4.823150 0.902491 -1.274999 0.220859 -0.576634 5.100000
4.695620 0.871516 -1.349997 0.255713 -0.576371 5.100000
4.562055 0.833957 -1.424996 0.292556 -0.575836 5.100000
4.422845 0.789145 -1.500002 0.329695 -0.536688 5.100000
4.278298 0.736796 -1.575003 0.364528 -0.484844 5.100000
4.128622 0.676806 -1.650002 0.397177 -0.440348 5.100000
3.974050 0.609109 -1.725001 0.427819 -0.398910 5.100000
3.814780 0.533659 -1.800000 0.456471 -0.359240 5.100000
3.650962 0.450436 -1.874998 0.483069 -0.320736 5.100000
3.482726 0.359480 -1.950155 0.507534 -0.283026 5.100000
3.310584 0.261177 -2.000000 0.529531 -0.240118 5.100000
3.138819 0.158550 -1.999964 0.546483 -0.164784 5.100000
2.969301 0.054189 -1.963353 0.555849 -0.066685 5.100000
2.805851 -0.047619 -1.888048 0.556992 0.033341 5.100000
2.648535 -0.145075 -1.813049 0.551009 0.133344 5.100000
2.496717 -0.237138 -1.738041 0.537912 0.233336 5.100000
2.349880 -0.322914 -1.663042 0.518275 0.333339 5.100000
2.207696 -0.401676 -1.588043 0.492276 0.433342 5.100000
2.069934 -0.472834 -1.513044 0.459967 0.533344 5.100000
1.936213 -0.536012 -1.445058 0.421929 0.593400 5.100000
1.806566 -0.591289 -1.371881 0.384181 0.593400 5.100000
1.681994 -0.639083 -1.296879 0.348458 0.593400 5.100000
1.562920 -0.680077 -1.221880 0.314754 0.593400 5.100000
1.449740 -0.714952 -1.146884 0.283056 0.593400 5.100000
1.342769 -0.744350 -1.071881 0.253360 0.593400 5.100000
1.242288 -0.768883 -0.996878 0.225677 0.593400 5.100000
1.148520 -0.789153 -0.921885 0.199995 0.593400 5.100000
1.061639 -0.805699 -0.846883 0.176325 0.593400 5.100000
0.981810 -0.819032 -0.771881 0.154658 0.593400 5.100000
0.909140 -0.829626 -0.696877 0.135005 0.593400 5.100000
0.843733 -0.837930 -0.621886 0.117359 0.593400 5.100000
0.785647 -0.844317 -0.546883 0.101719 0.593400 5.100000
0.734937 -0.849137 -0.471880 0.088081 0.593400 5.100000
0.691647 -0.852716 -0.396878 0.076637 0.554707 5.100000
0.655806 -0.855319 -0.321885 0.068730 0.453697 5.100000
0.627422 -0.857196 -0.246883 0.063875 0.353703 5.100000
0.606516 -0.858508 -0.171880 0.061234 0.253700 5.100000
0.593096 -0.859317 -0.096877 0.060108 0.153696 5.100000
0.587225 -0.859670 -0.021885 0.059850 0.053698 5.100000
0.588691 -0.859587 0.053118 0.059815 -0.046300 5.100000
0.597772 -0.859040 0.128120 0.059449 -0.146304 5.100000
0.614310 -0.858067 0.203122 0.058117 -0.246297 5.100000
0.638345 -0.856698 0.278116 0.055173 -0.346301 5.100000
0.669866 -0.855041 0.353118 0.049895 -0.446304 5.100000
0.708924 -0.853250 0.432351 0.041443 -0.547428 5.100000
0.752512 -0.851688 0.412882 0.030058 -0.593400 5.100000
0.789800 -0.850748 0.335364 0.020064 -0.593400 5.100000
0.819581 -0.850272 0.260361 0.012101 -0.593400 5.100000
0.841860 -0.850069 0.185359 0.006132 -0.593400 5.100000
0.856640 -0.850007 0.110367 0.002177 -0.593400 5.100000
