# Supplementary material for: Automatic Parking Controller with a Twin Artificial Neural Network Architecture
Source: Hindawi journal article supplement (doi:10.1155/2019/4801985), 2019-01-01
Supplement: f1 [file 4801985.f1.zip › data/data_245.txt]

6.000000 1.000000 0.000000 0.000000 0.000000 5.100000
5.996246 1.000000 -0.075001 0.000048 -0.030882 5.100000
5.985020 0.999998 -0.150003 0.000336 -0.069552 5.100000
5.966247 0.999980 -0.225004 0.001113 -0.108119 5.100000
5.939993 0.999937 -0.300002 0.002588 -0.146757 5.100000
5.906262 0.999808 -0.374999 0.005022 -0.185435 5.100000
5.865001 0.999535 -0.449998 0.008650 -0.224156 5.100000
5.816256 0.998988 -0.524999 0.013733 -0.262916 5.100000
5.760015 0.998028 -0.600001 0.020525 -0.301658 5.100000
5.696280 0.996452 -0.675001 0.029312 -0.340337 5.100000
5.625072 0.993975 -0.749999 0.040374 -0.378895 5.100000
5.546421 0.990269 -0.824996 0.053998 -0.417459 5.100000
5.460331 0.984918 -0.899995 0.070497 -0.449503 5.100000
5.366880 0.977425 -0.974996 0.089759 -0.474255 5.100000
5.266152 0.967253 -1.050001 0.111839 -0.498977 5.100000
5.158243 0.953770 -1.124999 0.136961 -0.523693 5.100000
5.043316 0.936287 -1.200000 0.165362 -0.548419 5.100000
4.921604 0.913991 -1.275002 0.197268 -0.571174 5.100000
4.793365 0.886048 -1.350002 0.231693 -0.565633 5.100000
4.658912 0.851818 -1.425000 0.266609 -0.541192 5.100000
4.518534 0.810829 -1.499997 0.301213 -0.512376 5.100000
4.372511 0.762691 -1.574996 0.335201 -0.482340 5.100000
4.221157 0.707104 -1.649998 0.368354 -0.452269 5.100000
4.064746 0.643784 -1.725000 0.400559 -0.422708 5.100000
3.903563 0.572498 -1.800000 0.431723 -0.393945 5.100000
3.737866 0.493088 -1.874998 0.461780 -0.366217 5.100000
3.567911 0.405376 -1.951401 0.490710 -0.340029 5.100000
3.394291 0.309467 -1.990268 0.517820 -0.295672 5.100000
3.221692 0.208557 -2.000000 0.539087 -0.214029 5.100000
3.050866 0.104678 -1.996948 0.552293 -0.115016 5.100000
2.884083 0.001139 -1.924375 0.557444 -0.015017 5.100000
2.723897 -0.098567 -1.849315 0.554857 0.084983 5.100000
2.569488 -0.193337 -1.774318 0.545091 0.184982 5.100000
2.420292 -0.282260 -1.699318 0.528575 0.284982 5.100000
2.275892 -0.364504 -1.624317 0.505631 0.384981 5.100000
2.136009 -0.439406 -1.549315 0.476379 0.484981 5.100000
2.000529 -0.506409 -1.473722 0.440748 0.591207 5.100000
1.868658 -0.565537 -1.408427 0.402170 0.593400 5.100000
1.741574 -0.616860 -1.333150 0.365483 0.593400 5.100000
1.619792 -0.661059 -1.258147 0.330801 0.593400 5.100000
1.503714 -0.698808 -1.183156 0.298136 0.593400 5.100000
1.393707 -0.730775 -1.108152 0.267472 0.593400 5.100000
1.290057 -0.757589 -1.033150 0.238812 0.593400 5.100000
1.193012 -0.779851 -0.958147 0.212162 0.593400 5.100000
1.102784 -0.798131 -0.883155 0.187524 0.593400 5.100000
1.019531 -0.812954 -0.808152 0.164888 0.593400 5.100000
0.943382 -0.824818 -0.733149 0.144263 0.593400 5.100000
0.874455 -0.834174 -0.658152 0.125640 0.593400 5.100000
0.812816 -0.841444 -0.583154 0.109032 0.593400 5.100000
0.758537 -0.846979 -0.508152 0.094425 0.593400 5.100000
0.711657 -0.851128 -0.433149 0.081840 0.591240 5.100000
0.672211 -0.854161 -0.358157 0.072116 0.502059 5.100000
0.640211 -0.856364 -0.283154 0.065892 0.402055 5.100000
0.615689 -0.857936 -0.208151 0.062283 0.302062 5.100000
0.598653 -0.858981 -0.133149 0.060511 0.202058 5.100000
0.589074 -0.859561 -0.058152 0.059906 0.102054 5.100000
0.587143 -0.859675 0.016847 0.059835 0.002062 5.100000
0.592457 -0.859360 0.091849 0.059713 -0.097942 5.100000
0.605382 -0.858590 0.166852 0.058922 -0.197944 5.100000
0.625792 -0.857408 0.241844 0.056837 -0.297939 5.100000
0.653687 -0.855869 0.316847 0.052784 -0.397943 5.100000
0.689087 -0.854119 0.391849 0.045983 -0.497937 5.100000
0.731843 -0.852362 0.438082 0.035576 -0.590651 5.100000
0.772709 -0.851133 0.371636 0.024644 -0.593400 5.100000
0.806119 -0.850460 0.296633 0.015699 -0.593400 5.100000
0.832023 -0.850139 0.221630 0.008768 -0.593400 5.100000
0.850429 -0.850028 0.146630 0.003838 -0.593400 5.100000
