# Supplementary material for: Automatic Parking Controller with a Twin Artificial Neural Network Architecture
Source: Hindawi journal article supplement (doi:10.1155/2019/4801985), 2019-01-01
Supplement: f1 [file 4801985.f1.zip › data/data_246.txt]

6.100000 1.000000 0.000000 0.000000 0.000000 5.100000
6.096259 1.000000 -0.074996 0.000046 -0.027357 5.100000
6.085021 0.999999 -0.150005 0.000310 -0.063224 5.100000
6.066238 0.999981 -0.225001 0.001032 -0.098888 5.100000
6.039998 0.999941 -0.299998 0.002407 -0.134518 5.100000
6.006263 0.999820 -0.374996 0.004664 -0.170064 5.100000
5.964998 0.999565 -0.450002 0.008018 -0.205487 5.100000
5.916255 0.999063 -0.524998 0.012693 -0.240713 5.100000
5.860011 0.998175 -0.599996 0.018926 -0.275631 5.100000
5.796278 0.996726 -0.675003 0.026949 -0.310117 5.100000
5.725063 0.994457 -0.749999 0.036995 -0.344227 5.100000
5.646393 0.991063 -0.824996 0.049280 -0.373684 5.100000
5.560272 0.986195 -0.900000 0.063847 -0.398369 5.100000
5.466778 0.979441 -0.975000 0.080761 -0.423092 5.100000
5.365933 0.970302 -1.049997 0.100248 -0.447807 5.100000
5.257864 0.958222 -1.125000 0.122506 -0.472534 5.100000
5.142679 0.942587 -1.200001 0.147767 -0.497487 5.100000
5.020538 0.922647 -1.274998 0.176038 -0.513823 5.100000
4.891689 0.897700 -1.350000 0.206499 -0.515853 5.100000
4.756373 0.867088 -1.425002 0.238498 -0.510182 5.100000
4.614857 0.830173 -1.499998 0.271496 -0.497996 5.100000
4.467461 0.786463 -1.574995 0.305006 -0.481896 5.100000
4.314507 0.735440 -1.650003 0.338716 -0.463726 5.100000
4.156327 0.676667 -1.724999 0.372414 -0.444931 5.100000
3.993276 0.609779 -1.799996 0.406007 -0.426560 5.100000
3.825721 0.534376 -1.875003 0.439442 -0.409383 5.100000
3.654028 0.450112 -1.950957 0.472870 -0.395228 5.100000
3.479033 0.356992 -2.000000 0.504340 -0.341445 5.100000
3.305190 0.257990 -2.000000 0.529699 -0.263055 5.100000
3.133518 0.155312 -2.000000 0.546943 -0.163550 5.100000
2.964115 0.050973 -1.962067 0.555891 -0.063549 5.100000
2.800867 -0.050729 -1.885716 0.556896 0.036452 5.100000
2.643736 -0.148028 -1.810708 0.550682 0.136454 5.100000
2.492071 -0.239889 -1.735712 0.537419 0.236454 5.100000
2.345392 -0.325469 -1.660715 0.517557 0.336446 5.100000
2.203345 -0.404008 -1.585714 0.491361 0.436448 5.100000
2.065721 -0.474918 -1.510687 0.458870 0.536694 5.100000
1.932106 -0.537852 -1.443248 0.420714 0.593400 5.100000
1.802612 -0.592885 -1.369549 0.383040 0.593400 5.100000
1.678205 -0.640457 -1.294546 0.347380 0.593400 5.100000
1.559308 -0.681251 -1.219548 0.313738 0.593400 5.100000
1.446318 -0.715946 -1.144551 0.282102 0.593400 5.100000
1.339545 -0.745183 -1.069548 0.252468 0.593400 5.100000
1.239271 -0.769574 -0.994546 0.224848 0.593400 5.100000
1.145714 -0.789720 -0.919553 0.199229 0.593400 5.100000
1.059050 -0.806159 -0.844551 0.175621 0.593400 5.100000
0.979441 -0.819400 -0.769548 0.154016 0.593400 5.100000
0.906995 -0.829916 -0.694545 0.134425 0.593400 5.100000
0.841815 -0.838155 -0.619554 0.116842 0.593400 5.100000
0.783958 -0.844489 -0.544550 0.101264 0.593400 5.100000
0.733479 -0.849266 -0.469548 0.087688 0.593400 5.100000
0.690421 -0.852810 -0.394546 0.076337 0.551944 5.100000
0.654814 -0.855387 -0.319553 0.068539 0.450587 5.100000
0.626662 -0.857244 -0.244550 0.063765 0.350593 5.100000
0.605987 -0.858541 -0.169547 0.061180 0.250590 5.100000
0.592795 -0.859335 -0.094544 0.060089 0.150586 5.100000
0.587150 -0.859674 -0.019553 0.059849 0.050589 5.100000
0.588870 -0.859576 0.055450 0.059812 -0.049411 5.100000
0.598176 -0.859016 0.130453 0.059425 -0.149414 5.100000
0.614944 -0.858030 0.205454 0.058053 -0.249407 5.100000
0.639209 -0.856650 0.280448 0.055049 -0.349411 5.100000
0.670963 -0.854987 0.355451 0.049686 -0.449414 5.100000
0.710251 -0.853195 0.433759 0.041122 -0.550291 5.100000
0.753790 -0.851650 0.409801 0.029714 -0.593400 5.100000
0.790841 -0.850727 0.333031 0.019785 -0.593400 5.100000
0.820389 -0.850261 0.258029 0.011884 -0.593400 5.100000
0.842435 -0.850066 0.183026 0.005977 -0.593400 5.100000
0.856983 -0.850006 0.108034 0.002085 -0.593400 5.100000
