# Supplementary material for: Automatic Parking Controller with a Twin Artificial Neural Network Architecture
Source: Hindawi journal article supplement (doi:10.1155/2019/4801985), 2019-01-01
Supplement: f1 [file 4801985.f1.zip › data/data_247.txt]

6.200000 1.000000 0.000000 0.000000 0.000000 5.100000
6.196263 1.000000 -0.074999 0.000039 -0.023731 5.100000
6.185028 0.999999 -0.149998 0.000297 -0.056726 5.100000
6.166238 0.999982 -0.224996 0.000956 -0.089444 5.100000
6.140007 0.999944 -0.299995 0.002228 -0.122053 5.100000
6.106253 0.999841 -0.375004 0.004297 -0.154491 5.100000
6.064996 0.999602 -0.450003 0.007369 -0.186667 5.100000
6.016257 0.999142 -0.525001 0.011648 -0.218504 5.100000
5.960007 0.998330 -0.600000 0.017333 -0.249861 5.100000
5.896275 0.996995 -0.674999 0.024613 -0.280610 5.100000
5.825054 0.994930 -0.749998 0.033674 -0.306797 5.100000
5.746359 0.991849 -0.824997 0.044571 -0.331508 5.100000
5.660226 0.987468 -0.899995 0.057457 -0.356233 5.100000
5.566679 0.981388 -0.974994 0.072528 -0.380946 5.100000
5.465760 0.973177 -1.050003 0.089972 -0.405665 5.100000
5.357554 0.962344 -1.125002 0.109987 -0.430422 5.100000
5.242162 0.948283 -1.200001 0.132664 -0.450215 5.100000
5.119708 0.930393 -1.274999 0.157719 -0.462746 5.100000
4.990388 0.908027 -1.349998 0.184920 -0.470455 5.100000
4.854394 0.880533 -1.424997 0.214035 -0.473403 5.100000
4.711979 0.847284 -1.499996 0.244741 -0.472142 5.100000
4.563439 0.807646 -1.574994 0.276771 -0.467523 5.100000
4.409079 0.761017 -1.650000 0.309876 -0.460901 5.100000
4.249284 0.706830 -1.725002 0.343930 -0.453544 5.100000
4.084420 0.644497 -1.800001 0.378864 -0.446700 5.100000
3.914963 0.573492 -1.875000 0.414759 -0.441623 5.100000
3.741392 0.493199 -1.950278 0.451792 -0.439487 5.100000
3.564672 0.403318 -1.999200 0.488257 -0.396407 5.100000
3.389501 0.306734 -2.000000 0.518231 -0.313399 5.100000
3.216908 0.205692 -2.000000 0.539569 -0.212257 5.100000
3.046065 0.101707 -1.990527 0.552611 -0.112259 5.100000
2.879578 -0.001663 -1.922248 0.557267 -0.012260 5.100000
2.719555 -0.101251 -1.847249 0.554624 0.087738 5.100000
2.565301 -0.195883 -1.772239 0.544721 0.187736 5.100000
2.416247 -0.284620 -1.697241 0.528042 0.287745 5.100000
2.271970 -0.366677 -1.622243 0.504903 0.387743 5.100000
2.132209 -0.441361 -1.547244 0.475488 0.487742 5.100000
1.996845 -0.508145 -1.471798 0.439691 0.592410 5.100000
1.865083 -0.567056 -1.406276 0.401131 0.593400 5.100000
1.738140 -0.618173 -1.331080 0.364499 0.593400 5.100000
1.616509 -0.662185 -1.256077 0.329872 0.593400 5.100000
1.500595 -0.699766 -1.181085 0.297262 0.593400 5.100000
1.390760 -0.731581 -1.106082 0.266654 0.593400 5.100000
1.287289 -0.758262 -1.031080 0.238050 0.593400 5.100000
1.190431 -0.780405 -0.956077 0.211455 0.593400 5.100000
1.100393 -0.798583 -0.881084 0.186873 0.593400 5.100000
1.017334 -0.813319 -0.806082 0.164292 0.593400 5.100000
0.941382 -0.825108 -0.731079 0.143722 0.593400 5.100000
0.872655 -0.834402 -0.656083 0.125155 0.593400 5.100000
0.811218 -0.841619 -0.581084 0.108602 0.593400 5.100000
0.757143 -0.847111 -0.506081 0.094050 0.593400 5.100000
0.710468 -0.851225 -0.431079 0.081522 0.590043 5.100000
0.671230 -0.854232 -0.356087 0.071902 0.499298 5.100000
0.639438 -0.856415 -0.281084 0.065763 0.399295 5.100000
0.615120 -0.857971 -0.206081 0.062213 0.299302 5.100000
0.598289 -0.859003 -0.131079 0.060482 0.199298 5.100000
0.588910 -0.859571 -0.056083 0.059899 0.099294 5.100000
0.587198 -0.859672 0.018917 0.059835 -0.000698 5.100000
0.592717 -0.859344 0.093919 0.059702 -0.100702 5.100000
0.605845 -0.858562 0.168922 0.058885 -0.200703 5.100000
0.626460 -0.857370 0.243914 0.056756 -0.300699 5.100000
0.654561 -0.855823 0.318917 0.052638 -0.400703 5.100000
0.690169 -0.854070 0.393920 0.045749 -0.500696 5.100000
0.733070 -0.852318 0.438141 0.035250 -0.591797 5.100000
0.773731 -0.851107 0.369566 0.024370 -0.593400 5.100000
0.806937 -0.850447 0.294563 0.015481 -0.593400 5.100000
0.832634 -0.850134 0.219560 0.008604 -0.593400 5.100000
0.850834 -0.850026 0.144561 0.003730 -0.593400 5.100000
