# Supplementary material for: Automatic Parking Controller with a Twin Artificial Neural Network Architecture
Source: Hindawi journal article supplement (doi:10.1155/2019/4801985), 2019-01-01
Supplement: f1 [file 4801985.f1.zip › data/data_248.txt]

6.300000 1.000000 0.000000 0.000000 0.000000 5.100000
6.296270 1.000000 -0.075002 0.000038 -0.019905 5.100000
6.285021 1.000000 -0.150001 0.000274 -0.049952 5.100000
6.266237 0.999993 -0.224996 0.000877 -0.079618 5.100000
6.240013 0.999946 -0.300003 0.002032 -0.109125 5.100000
6.206250 0.999851 -0.374998 0.003916 -0.138411 5.100000
6.165003 0.999633 -0.450000 0.006704 -0.167358 5.100000
6.116260 0.999218 -0.524999 0.010572 -0.195880 5.100000
6.060003 0.998480 -0.600003 0.015699 -0.221596 5.100000
5.996272 0.997281 -0.675000 0.022170 -0.246283 5.100000
5.925043 0.995418 -0.749996 0.030152 -0.271005 5.100000
5.846341 0.992677 -0.825002 0.039817 -0.295727 5.100000
5.760189 0.988750 -0.899997 0.051326 -0.320449 5.100000
5.666585 0.983318 -0.975001 0.064884 -0.345171 5.100000
5.565609 0.975972 -1.049998 0.080639 -0.368852 5.100000
5.457299 0.966244 -1.125004 0.098588 -0.387556 5.100000
5.341733 0.953654 -1.200000 0.118718 -0.403880 5.100000
5.219026 0.937638 -1.274996 0.141011 -0.417496 5.100000
5.089311 0.917613 -1.350001 0.165413 -0.428332 5.100000
4.952772 0.892984 -1.424996 0.191835 -0.436462 5.100000
4.809618 0.863068 -1.500002 0.220159 -0.442252 5.100000
4.660110 0.827248 -1.574997 0.250291 -0.446329 5.100000
4.504551 0.784834 -1.650004 0.282183 -0.449588 5.100000
4.343286 0.735124 -1.724999 0.315831 -0.453164 5.100000
4.176762 0.677431 -1.799998 0.351382 -0.458524 5.100000
4.005464 0.610964 -1.875000 0.389126 -0.467569 5.100000
3.830006 0.534853 -1.952029 0.429824 -0.484946 5.100000
3.651534 0.448508 -1.996503 0.470574 -0.437017 5.100000
3.474917 0.354676 -2.000000 0.504636 -0.358836 5.100000
3.301163 0.255639 -2.000000 0.530181 -0.261222 5.100000
3.129570 0.152903 -2.000000 0.547234 -0.161216 5.100000
2.960257 0.048572 -1.961643 0.556188 -0.061222 5.100000
2.797146 -0.053039 -1.883960 0.557075 0.038782 5.100000
2.640142 -0.150242 -1.808965 0.550422 0.138778 5.100000
2.488600 -0.241961 -1.733966 0.537039 0.238783 5.100000
2.342034 -0.327384 -1.658964 0.517020 0.338778 5.100000
2.200086 -0.405752 -1.583969 0.490677 0.438783 5.100000
2.062572 -0.476465 -1.508878 0.458028 0.539660 5.100000
1.929033 -0.539225 -1.441859 0.419805 0.593400 5.100000
1.799654 -0.594076 -1.367801 0.382187 0.593400 5.100000
1.675370 -0.641483 -1.292799 0.346573 0.593400 5.100000
1.556606 -0.682126 -1.217801 0.312978 0.593400 5.100000
1.443758 -0.716687 -1.142803 0.281389 0.593400 5.100000
1.337134 -0.745805 -1.067801 0.251802 0.593400 5.100000
1.237014 -0.770090 -0.992798 0.224228 0.593400 5.100000
1.143617 -0.790143 -0.917806 0.198656 0.593400 5.100000
1.057115 -0.806502 -0.842803 0.175095 0.593400 5.100000
0.977671 -0.819675 -0.767801 0.153537 0.593400 5.100000
0.905393 -0.830132 -0.692797 0.133992 0.593400 5.100000
0.840382 -0.838323 -0.617806 0.116456 0.593400 5.100000
0.782697 -0.844616 -0.542803 0.100925 0.593400 5.100000
0.732391 -0.849362 -0.467800 0.087394 0.593400 5.100000
0.689507 -0.852879 -0.392799 0.076115 0.549795 5.100000
0.654074 -0.855438 -0.317805 0.068398 0.448257 5.100000
0.626098 -0.857280 -0.242802 0.063684 0.348263 5.100000
0.605596 -0.858565 -0.167800 0.061140 0.248260 5.100000
0.592576 -0.859349 -0.092797 0.060076 0.148256 5.100000
0.587099 -0.859677 -0.017805 0.059847 0.048259 5.100000
0.589010 -0.859567 0.057198 0.059809 -0.051741 5.100000
0.598484 -0.858998 0.132201 0.059406 -0.151745 5.100000
0.615425 -0.858002 0.207201 0.058004 -0.251737 5.100000
0.639863 -0.856614 0.282196 0.054954 -0.351741 5.100000
0.671790 -0.854946 0.357198 0.049528 -0.451744 5.100000
0.711248 -0.853155 0.434564 0.040880 -0.552369 5.100000
0.754742 -0.851622 0.407540 0.029458 -0.593400 5.100000
0.791616 -0.850712 0.331284 0.019578 -0.593400 5.100000
0.820990 -0.850254 0.256281 0.011724 -0.593400 5.100000
0.842862 -0.850064 0.181278 0.005863 -0.593400 5.100000
0.857236 -0.850005 0.106287 0.002017 -0.593400 5.100000
