# Supplementary material for: Automatic Parking Controller with a Twin Artificial Neural Network Architecture
Source: Hindawi journal article supplement (doi:10.1155/2019/4801985), 2019-01-01
Supplement: f1 [file 4801985.f1.zip › data/data_249.txt]

6.400000 1.000000 0.000000 0.000000 0.000000 5.100000
6.396272 1.000000 -0.075001 0.000037 -0.016540 5.100000
6.385028 1.000000 -0.150003 0.000252 -0.043528 5.100000
6.366236 0.999994 -0.225001 0.000801 -0.070353 5.100000
6.340014 0.999949 -0.299997 0.001852 -0.096796 5.100000
6.306244 0.999869 -0.375005 0.003551 -0.121572 5.100000
6.265001 0.999669 -0.450001 0.006042 -0.146301 5.100000
6.216257 0.999297 -0.524998 0.009475 -0.171019 5.100000
6.160001 0.998636 -0.599999 0.014004 -0.195737 5.100000
6.096270 0.997568 -0.675002 0.019785 -0.220455 5.100000
6.025028 0.995905 -0.750001 0.026995 -0.245189 5.100000
5.946324 0.993437 -0.825003 0.035780 -0.269218 5.100000
5.860141 0.989907 -0.900003 0.046231 -0.290884 5.100000
5.766524 0.985018 -0.974999 0.058457 -0.311345 5.100000
5.665492 0.978399 -1.050006 0.072537 -0.330374 5.100000
5.557093 0.969654 -1.125004 0.088540 -0.347808 5.100000
5.441395 0.958346 -1.200000 0.106518 -0.363550 5.100000
5.318481 0.943975 -1.274999 0.126486 -0.377552 5.100000
5.188478 0.925996 -1.350001 0.148463 -0.389879 5.100000
5.051502 0.903846 -1.425001 0.172434 -0.400733 5.100000
4.907767 0.876892 -1.500002 0.198405 -0.410505 5.100000
4.757476 0.844497 -1.575004 0.226404 -0.419785 5.100000
4.600902 0.805948 -1.650002 0.256508 -0.429415 5.100000
4.438393 0.760524 -1.724998 0.288873 -0.440616 5.100000
4.270339 0.707393 -1.800006 0.323812 -0.455249 5.100000
4.097297 0.645647 -1.875002 0.362118 -0.479339 5.100000
3.919916 0.574187 -1.950007 0.404402 -0.504060 5.100000
3.739502 0.492047 -1.999447 0.449618 -0.495273 5.100000
3.561133 0.401456 -2.000000 0.488812 -0.411175 5.100000
3.386061 0.304757 -2.000000 0.518768 -0.310250 5.100000
3.213507 0.203660 -2.000000 0.539890 -0.210254 5.100000
3.042617 0.099585 -1.990859 0.552782 -0.110254 5.100000
2.876296 -0.003711 -1.920863 0.557171 -0.010250 5.100000
2.716408 -0.103195 -1.845743 0.554539 0.089753 5.100000
2.562259 -0.197733 -1.770735 0.544428 0.189746 5.100000
2.413301 -0.286335 -1.695739 0.527649 0.289750 5.100000
2.269119 -0.368254 -1.620740 0.504375 0.389752 5.100000
2.129445 -0.442787 -1.545738 0.474829 0.489750 5.100000
1.994162 -0.509406 -1.470426 0.438923 0.592992 5.100000
1.862482 -0.568158 -1.404715 0.400375 0.593400 5.100000
1.735641 -0.619126 -1.329572 0.363783 0.593400 5.100000
1.614121 -0.663002 -1.254569 0.329197 0.593400 5.100000
1.498326 -0.700461 -1.179578 0.296627 0.593400 5.100000
1.388616 -0.732167 -1.104575 0.266059 0.593400 5.100000
1.285276 -0.758749 -1.029572 0.237496 0.593400 5.100000
1.188554 -0.780808 -0.954570 0.210942 0.593400 5.100000
1.098655 -0.798911 -0.879577 0.186399 0.593400 5.100000
1.015738 -0.813584 -0.804574 0.163859 0.593400 5.100000
0.939929 -0.825318 -0.729572 0.143330 0.593400 5.100000
0.871348 -0.834567 -0.654576 0.124802 0.593400 5.100000
0.810057 -0.841745 -0.579577 0.108289 0.593400 5.100000
0.756131 -0.847206 -0.504574 0.093778 0.593400 5.100000
0.709605 -0.851296 -0.429571 0.081291 0.589031 5.100000
0.670518 -0.854283 -0.354579 0.071748 0.497288 5.100000
0.638878 -0.856451 -0.279576 0.065670 0.397285 5.100000
0.614711 -0.857997 -0.204574 0.062163 0.297291 5.100000
0.598028 -0.859018 -0.129571 0.060461 0.197288 5.100000
0.588796 -0.859577 -0.054576 0.059895 0.097284 5.100000
0.587239 -0.859670 0.020424 0.059835 -0.002708 5.100000
0.592911 -0.859332 0.095427 0.059693 -0.102712 5.100000
0.606187 -0.858542 0.170430 0.058857 -0.202713 5.100000
0.626951 -0.857342 0.245421 0.056695 -0.302709 5.100000
0.655201 -0.855790 0.320425 0.052531 -0.402713 5.100000
0.690960 -0.854034 0.395427 0.045577 -0.502706 5.100000
0.733959 -0.852287 0.438174 0.035014 -0.592452 5.100000
0.774472 -0.851089 0.368058 0.024171 -0.593400 5.100000
0.807528 -0.850438 0.293055 0.015323 -0.593400 5.100000
0.833076 -0.850130 0.218053 0.008486 -0.593400 5.100000
0.851126 -0.850025 0.143054 0.003652 -0.593400 5.100000
