# Supplementary material for: Automatic Parking Controller with a Twin Artificial Neural Network Architecture
Source: Hindawi journal article supplement (doi:10.1155/2019/4801985), 2019-01-01
Supplement: f1 [file 4801985.f1.zip › data/data_250.txt]

6.500000 1.000000 0.000000 0.000000 0.000000 5.100000
6.496277 1.000000 -0.075001 0.000031 -0.012394 5.100000
6.485019 1.000000 -0.150001 0.000211 -0.035359 5.100000
6.466243 0.999995 -0.224996 0.000700 -0.059280 5.100000
6.440014 0.999963 -0.300003 0.001628 -0.083048 5.100000
6.406242 0.999877 -0.374997 0.003131 -0.106579 5.100000
6.365009 0.999710 -0.450004 0.005360 -0.129798 5.100000
6.316244 0.999378 -0.524998 0.008442 -0.152637 5.100000
6.260010 0.998784 -0.600005 0.012516 -0.174990 5.100000
6.196263 0.997829 -0.675000 0.017715 -0.196776 5.100000
6.125023 0.996343 -0.750001 0.024159 -0.217882 5.100000
6.046309 0.994135 -0.825001 0.031952 -0.238217 5.100000
5.960116 0.990990 -0.900004 0.041221 -0.257678 5.100000
5.866470 0.986626 -0.975002 0.052051 -0.276166 5.100000
5.765386 0.980738 -1.049997 0.064525 -0.293609 5.100000
5.656919 0.972966 -1.125004 0.078725 -0.309966 5.100000
5.541105 0.962899 -1.199998 0.094711 -0.325231 5.100000
5.418015 0.950113 -1.275005 0.112538 -0.339483 5.100000
5.287754 0.934100 -1.349999 0.132256 -0.352871 5.100000
5.150420 0.914326 -1.425001 0.153931 -0.365672 5.100000
5.006179 0.890209 -1.500000 0.177624 -0.378313 5.100000
4.855211 0.861102 -1.575003 0.203447 -0.391187 5.100000
4.697764 0.826326 -1.650001 0.231777 -0.410622 5.100000
4.534151 0.785005 -1.725006 0.263306 -0.435589 5.100000
4.364812 0.736199 -1.800003 0.298380 -0.460313 5.100000
4.190251 0.678820 -1.874998 0.337223 -0.485025 5.100000
4.011153 0.611737 -1.952953 0.380106 -0.509749 5.100000
3.828757 0.533906 -1.991158 0.427094 -0.533565 5.100000
3.648696 0.447011 -2.000000 0.470587 -0.454864 5.100000
3.472101 0.353138 -2.000000 0.505097 -0.359632 5.100000
3.298406 0.254007 -2.000000 0.530545 -0.259627 5.100000
3.126791 0.151222 -1.998852 0.547406 -0.159634 5.100000
2.957600 0.046916 -1.957187 0.556245 -0.059628 5.100000
2.794601 -0.054623 -1.882774 0.556941 0.040365 5.100000
2.637696 -0.151738 -1.807772 0.550256 0.140370 5.100000
2.486235 -0.243373 -1.732772 0.536758 0.240369 5.100000
2.339733 -0.328676 -1.657771 0.516667 0.340369 5.100000
2.197862 -0.406942 -1.582776 0.490198 0.440374 5.100000
2.060428 -0.477517 -1.507615 0.457454 0.541977 5.100000
1.926938 -0.540159 -1.440894 0.419187 0.593400 5.100000
1.797636 -0.594886 -1.366609 0.381605 0.593400 5.100000
1.673437 -0.642180 -1.291606 0.346023 0.593400 5.100000
1.554764 -0.682722 -1.216609 0.312460 0.593400 5.100000
1.442013 -0.717191 -1.141611 0.280903 0.593400 5.100000
1.335490 -0.746227 -1.066608 0.251348 0.593400 5.100000
1.235476 -0.770440 -0.991606 0.223806 0.593400 5.100000
1.142188 -0.790430 -0.916613 0.198266 0.593400 5.100000
1.055796 -0.806735 -0.841611 0.174737 0.593400 5.100000
0.976466 -0.819861 -0.766608 0.153210 0.593400 5.100000
0.904302 -0.830279 -0.691605 0.133697 0.593400 5.100000
0.839406 -0.838437 -0.616613 0.116193 0.593400 5.100000
0.781839 -0.844703 -0.541610 0.100694 0.593400 5.100000
0.731650 -0.849428 -0.466608 0.087195 0.593400 5.100000
0.688885 -0.852927 -0.391607 0.075964 0.548293 5.100000
0.653572 -0.855472 -0.316612 0.068302 0.446667 5.100000
0.625716 -0.857305 -0.241610 0.063630 0.346673 5.100000
0.605332 -0.858581 -0.166607 0.061114 0.246670 5.100000
0.592430 -0.859357 -0.091604 0.060067 0.146666 5.100000
0.587066 -0.859679 -0.016612 0.059847 0.046670 5.100000
0.589108 -0.859562 0.058390 0.059807 -0.053331 5.100000
0.598697 -0.858985 0.133393 0.059393 -0.153335 5.100000
0.615756 -0.857983 0.208393 0.057970 -0.253327 5.100000
0.640311 -0.856590 0.283388 0.054889 -0.353331 5.100000
0.672357 -0.854918 0.358391 0.049419 -0.453334 5.100000
0.711930 -0.853127 0.434979 0.040714 -0.553752 5.100000
0.755389 -0.851603 0.406031 0.029284 -0.593400 5.100000
0.792143 -0.850702 0.330091 0.019437 -0.593400 5.100000
0.821397 -0.850249 0.255089 0.011615 -0.593400 5.100000
0.843151 -0.850062 0.180086 0.005786 -0.593400 5.100000
0.857407 -0.850005 0.105094 0.001972 -0.593400 5.100000
