# Supplementary material for: Automatic Parking Controller with a Twin Artificial Neural Network Architecture
Source: Hindawi journal article supplement (doi:10.1155/2019/4801985), 2019-01-01
Supplement: f1 [file 4801985.f1.zip › data/data_251.txt]

6.600000 1.000000 0.000000 0.000000 0.000000 5.100000
6.596284 1.000000 -0.074999 0.000030 -0.010190 5.100000
6.585014 1.000000 -0.149998 0.000192 -0.029868 5.100000
6.566246 0.999995 -0.224997 0.000624 -0.051057 5.100000
6.540012 0.999966 -0.299996 0.001450 -0.072081 5.100000
6.506242 0.999892 -0.375005 0.002786 -0.092882 5.100000
6.465005 0.999740 -0.450003 0.004763 -0.113425 5.100000
6.416244 0.999442 -0.525002 0.007495 -0.133623 5.100000
6.360014 0.998925 -0.600001 0.011099 -0.153427 5.100000
6.296254 0.998073 -0.675000 0.015703 -0.172757 5.100000
6.225023 0.996757 -0.749998 0.021395 -0.191549 5.100000
6.146297 0.994804 -0.824997 0.028290 -0.209743 5.100000
6.060091 0.992014 -0.899996 0.036476 -0.227281 5.100000
5.966418 0.988157 -0.975005 0.046066 -0.244135 5.100000
5.865307 0.982940 -1.050004 0.057114 -0.260282 5.100000
5.756775 0.976065 -1.125003 0.069722 -0.275745 5.100000
5.640864 0.967142 -1.200002 0.083957 -0.290599 5.100000
5.517647 0.955798 -1.275000 0.099894 -0.304969 5.100000
5.387160 0.941564 -1.349999 0.117615 -0.319056 5.100000
5.249545 0.923948 -1.424998 0.137224 -0.333187 5.100000
5.104888 0.902388 -1.499997 0.158832 -0.347676 5.100000
4.953385 0.876272 -1.574998 0.182897 -0.370737 5.100000
4.795225 0.844834 -1.650005 0.209966 -0.395484 5.100000
4.630739 0.807205 -1.725003 0.240272 -0.420195 5.100000
4.460272 0.762418 -1.800002 0.274025 -0.444780 5.100000
4.284348 0.709435 -1.875001 0.311607 -0.481488 5.100000
4.103598 0.646970 -1.950000 0.354671 -0.515858 5.100000
3.919393 0.573766 -2.000000 0.402579 -0.542636 5.100000
3.737258 0.490953 -2.000000 0.449945 -0.495337 5.100000
3.558999 0.400300 -2.000000 0.489248 -0.409868 5.100000
3.383958 0.303572 -2.000000 0.519041 -0.309056 5.100000
3.211432 0.202405 -2.000000 0.540137 -0.209058 5.100000
3.040732 0.098430 -1.991802 0.552814 -0.109059 5.100000
2.874362 -0.004926 -1.920102 0.557369 -0.009061 5.100000
2.714531 -0.104347 -1.844849 0.554511 0.090938 5.100000
2.560455 -0.198828 -1.769842 0.544259 0.190936 5.100000
2.411553 -0.287348 -1.694842 0.527409 0.290938 5.100000
2.267434 -0.369186 -1.619843 0.504062 0.390943 5.100000
2.127811 -0.443625 -1.544844 0.474441 0.490942 5.100000
1.992573 -0.510151 -1.469626 0.438468 0.593217 5.100000
1.860943 -0.568809 -1.403794 0.399928 0.593400 5.100000
1.734163 -0.619688 -1.328680 0.363359 0.593400 5.100000
1.612709 -0.663485 -1.253677 0.328797 0.593400 5.100000
1.496984 -0.700871 -1.178685 0.296251 0.593400 5.100000
1.387348 -0.732512 -1.103682 0.265708 0.593400 5.100000
1.284086 -0.759037 -1.028680 0.237168 0.593400 5.100000
1.187444 -0.781045 -0.953678 0.210638 0.593400 5.100000
1.097627 -0.799105 -0.878684 0.186120 0.593400 5.100000
1.014794 -0.813739 -0.803682 0.163603 0.593400 5.100000
0.939070 -0.825442 -0.728679 0.143097 0.593400 5.100000
0.870575 -0.834664 -0.653684 0.124594 0.593400 5.100000
0.809372 -0.841820 -0.578684 0.108105 0.593400 5.100000
0.755533 -0.847262 -0.503681 0.093617 0.593400 5.100000
0.709096 -0.851337 -0.428678 0.081155 0.588381 5.100000
0.670098 -0.854313 -0.353687 0.071658 0.496098 5.100000
0.638548 -0.856473 -0.278684 0.065615 0.396095 5.100000
0.614470 -0.858012 -0.203681 0.062134 0.296101 5.100000
0.597875 -0.859027 -0.128678 0.060449 0.196098 5.100000
0.588731 -0.859581 -0.053684 0.059892 0.096094 5.100000
0.587265 -0.859669 0.021317 0.059835 -0.003898 5.100000
0.593027 -0.859325 0.096319 0.059688 -0.103902 5.100000
0.606390 -0.858530 0.171322 0.058840 -0.203902 5.100000
0.627243 -0.857325 0.246314 0.056659 -0.303899 5.100000
0.655582 -0.855770 0.321317 0.052466 -0.403903 5.100000
0.691429 -0.854012 0.396331 0.045475 -0.503899 5.100000
0.734483 -0.852269 0.438189 0.034875 -0.592763 5.100000
0.774910 -0.851078 0.367165 0.024054 -0.593400 5.100000
0.807877 -0.850433 0.292163 0.015230 -0.593400 5.100000
0.833336 -0.850128 0.217160 0.008416 -0.593400 5.100000
0.851297 -0.850024 0.142162 0.003606 -0.593400 5.100000
