# Supplementary material for: Automatic Parking Controller with a Twin Artificial Neural Network Architecture
Source: Hindawi journal article supplement (doi:10.1155/2019/4801985), 2019-01-01
Supplement: f1 [file 4801985.f1.zip › data/data_252.txt]

6.700000 1.000000 0.000000 0.000000 0.000000 5.100000
6.696292 1.000000 -0.075001 0.000025 -0.008246 5.100000
6.685011 1.000000 -0.150002 0.000176 -0.024949 5.100000
6.666251 0.999996 -0.225003 0.000555 -0.043669 5.100000
6.640005 0.999968 -0.300004 0.001294 -0.062239 5.100000
6.606245 0.999909 -0.374995 0.002476 -0.080631 5.100000
6.565002 0.999766 -0.449997 0.004226 -0.098812 5.100000
6.516244 0.999501 -0.524998 0.006652 -0.116716 5.100000
6.460014 0.999045 -0.599999 0.009842 -0.134306 5.100000
6.396259 0.998287 -0.675000 0.013920 -0.151542 5.100000
6.325019 0.997124 -0.750001 0.018959 -0.168369 5.100000
6.246283 0.995391 -0.825003 0.025071 -0.184760 5.100000
6.160072 0.992922 -0.900004 0.032342 -0.200710 5.100000
6.066383 0.989498 -0.974997 0.040847 -0.216201 5.100000
5.965241 0.984877 -1.049996 0.050681 -0.231265 5.100000
5.856662 0.978765 -1.124997 0.061929 -0.245955 5.100000
5.740685 0.970840 -1.199998 0.074667 -0.260377 5.100000
5.617348 0.960734 -1.274999 0.088983 -0.274685 5.100000
5.486717 0.948041 -1.350000 0.104990 -0.289127 5.100000
5.348864 0.932279 -1.425002 0.122796 -0.304014 5.100000
5.203902 0.912950 -1.500003 0.142588 -0.321088 5.100000
5.051962 0.889433 -1.575004 0.164924 -0.345973 5.100000
4.893251 0.860990 -1.650001 0.190154 -0.370693 5.100000
4.727999 0.826778 -1.724996 0.218489 -0.395410 5.100000
4.556573 0.785902 -1.799997 0.250147 -0.421107 5.100000
4.379369 0.737313 -1.874998 0.285783 -0.466654 5.100000
4.197019 0.679623 -1.953240 0.328082 -0.522799 5.100000
4.010864 0.611231 -1.990033 0.376603 -0.546508 5.100000
3.826904 0.533019 -2.000000 0.427023 -0.543006 5.100000
3.646814 0.446061 -2.000000 0.471037 -0.458764 5.100000
3.470261 0.352114 -2.000000 0.505439 -0.358538 5.100000
3.296586 0.252951 -2.000000 0.530742 -0.258536 5.100000
3.124980 0.150108 -2.000000 0.547593 -0.158539 5.100000
2.955770 0.045789 -1.957482 0.556112 -0.058543 5.100000
2.792859 -0.055715 -1.881951 0.556742 0.041457 5.100000
2.636010 -0.152762 -1.806951 0.550203 0.141460 5.100000
2.484614 -0.244348 -1.731959 0.536558 0.241460 5.100000
2.338166 -0.329566 -1.656958 0.516413 0.341462 5.100000
2.196340 -0.407752 -1.581957 0.489876 0.441460 5.100000
2.058950 -0.478242 -1.506732 0.457055 0.543778 5.100000
1.925502 -0.540798 -1.440223 0.418764 0.593400 5.100000
1.796254 -0.595440 -1.365791 0.381206 0.593400 5.100000
1.672113 -0.642658 -1.290789 0.345646 0.593400 5.100000
1.553503 -0.683129 -1.215792 0.312105 0.593400 5.100000
1.440817 -0.717535 -1.140793 0.280570 0.593400 5.100000
1.334364 -0.746516 -1.065791 0.251036 0.593400 5.100000
1.234422 -0.770680 -0.990788 0.223517 0.593400 5.100000
1.141209 -0.790626 -0.915796 0.197999 0.593400 5.100000
1.054894 -0.806894 -0.840793 0.174491 0.593400 5.100000
0.975640 -0.819988 -0.765790 0.152986 0.593400 5.100000
0.903555 -0.830379 -0.690787 0.133495 0.593400 5.100000
0.838739 -0.838515 -0.615796 0.116013 0.593400 5.100000
0.781251 -0.844762 -0.540793 0.100536 0.593400 5.100000
0.731144 -0.849472 -0.465790 0.087058 0.593400 5.100000
0.688460 -0.852959 -0.390790 0.075861 0.547247 5.100000
0.653228 -0.855495 -0.315795 0.068237 0.445576 5.100000
0.625456 -0.857321 -0.240792 0.063593 0.345583 5.100000
0.605153 -0.858592 -0.165790 0.061096 0.245580 5.100000
0.592331 -0.859364 -0.090787 0.060061 0.145576 5.100000
0.587045 -0.859680 -0.015795 0.059846 0.045580 5.100000
0.589176 -0.859557 0.059208 0.059806 -0.054421 5.100000
0.598844 -0.858976 0.134211 0.059384 -0.154425 5.100000
0.615984 -0.857970 0.209210 0.057946 -0.254417 5.100000
0.640620 -0.856573 0.284206 0.054843 -0.354421 5.100000
0.672747 -0.854899 0.359208 0.049343 -0.454424 5.100000
0.712397 -0.853108 0.435198 0.040600 -0.554682 5.100000
0.755831 -0.851590 0.405017 0.029165 -0.593400 5.100000
0.792502 -0.850695 0.329274 0.019340 -0.593400 5.100000
0.821675 -0.850246 0.254271 0.011540 -0.593400 5.100000
0.843348 -0.850061 0.179268 0.005733 -0.593400 5.100000
0.857523 -0.850005 0.104277 0.001940 -0.593400 5.100000
