# Supplementary material for: Automatic Parking Controller with a Twin Artificial Neural Network Architecture
Source: Hindawi journal article supplement (doi:10.1155/2019/4801985), 2019-01-01
Supplement: f1 [file 4801985.f1.zip › data/data_253.txt]

6.800000 1.000000 0.000000 0.000000 0.000000 5.100000
6.796301 1.000000 -0.075003 0.000025 -0.006854 5.100000
6.785001 1.000000 -0.149995 0.000160 -0.020629 5.100000
6.766251 0.999997 -0.224998 0.000503 -0.037194 5.100000
6.740004 0.999970 -0.300000 0.001149 -0.053626 5.100000
6.706252 0.999914 -0.375004 0.002210 -0.069920 5.100000
6.664998 0.999790 -0.449996 0.003766 -0.086045 5.100000
6.616252 0.999560 -0.524998 0.005915 -0.101963 5.100000
6.560005 0.999152 -0.600001 0.008761 -0.117645 5.100000
6.496254 0.998477 -0.675004 0.012374 -0.133061 5.100000
6.425013 0.997445 -0.749996 0.016852 -0.148185 5.100000
6.346278 0.995903 -0.824999 0.022289 -0.163023 5.100000
6.260054 0.993711 -0.900001 0.028759 -0.177557 5.100000
6.166358 0.990661 -0.975005 0.036344 -0.191810 5.100000
6.065186 0.986544 -1.049997 0.045132 -0.205839 5.100000
5.956579 0.981099 -1.124999 0.055195 -0.219711 5.100000
5.840539 0.974037 -1.200002 0.066629 -0.233559 5.100000
5.717122 0.965008 -1.275000 0.079533 -0.247531 5.100000
5.586363 0.953643 -1.349997 0.094009 -0.261884 5.100000
5.448337 0.939514 -1.425000 0.110190 -0.276812 5.100000
5.303126 0.922140 -1.500002 0.128290 -0.294763 5.100000
5.150854 0.900930 -1.575000 0.148817 -0.319455 5.100000
4.991665 0.875197 -1.649998 0.172121 -0.344172 5.100000
4.825806 0.844150 -1.725000 0.198404 -0.368890 5.100000
4.653546 0.806906 -1.800003 0.227877 -0.393683 5.100000
4.475252 0.762485 -1.875001 0.261201 -0.439988 5.100000
4.291487 0.709549 -1.950003 0.300960 -0.522025 5.100000
4.103657 0.646265 -2.000000 0.349631 -0.552727 5.100000
3.917511 0.572898 -2.000000 0.401947 -0.577392 5.100000
3.735485 0.490094 -2.000000 0.450350 -0.501202 5.100000
3.557253 0.399378 -2.000000 0.489587 -0.408067 5.100000
3.382241 0.302583 -2.000000 0.519309 -0.308056 5.100000
3.209734 0.201390 -2.000000 0.540280 -0.208058 5.100000
3.039007 0.097363 -1.989632 0.552971 -0.108059 5.100000
2.872731 -0.005932 -1.919094 0.557479 -0.008061 5.100000
2.712970 -0.105329 -1.844099 0.554435 0.091938 5.100000
2.558939 -0.199738 -1.769096 0.544135 0.191936 5.100000
2.410092 -0.288209 -1.694093 0.527204 0.291939 5.100000
2.266016 -0.369958 -1.619090 0.503797 0.391943 5.100000
2.126437 -0.444334 -1.544098 0.474112 0.491942 5.100000
1.991239 -0.510777 -1.468960 0.438086 0.593337 5.100000
1.859651 -0.569355 -1.403022 0.399553 0.593400 5.100000
1.732921 -0.620160 -1.327930 0.363004 0.593400 5.100000
1.611522 -0.663889 -1.252927 0.328462 0.593400 5.100000
1.495857 -0.701215 -1.177935 0.295936 0.593400 5.100000
1.386283 -0.732802 -1.102932 0.265412 0.593400 5.100000
1.283086 -0.759278 -1.027930 0.236893 0.593400 5.100000
1.186512 -0.781244 -0.952928 0.210382 0.593400 5.100000
1.096765 -0.799267 -0.877934 0.185885 0.593400 5.100000
1.014001 -0.813870 -0.802932 0.163388 0.593400 5.100000
0.938349 -0.825546 -0.727929 0.142903 0.593400 5.100000
0.869927 -0.834745 -0.652934 0.124419 0.593400 5.100000
0.808797 -0.841882 -0.577934 0.107950 0.593400 5.100000
0.755031 -0.847309 -0.502931 0.093482 0.593400 5.100000
0.708669 -0.851372 -0.427928 0.081040 0.587807 5.100000
0.669745 -0.854339 -0.352937 0.071582 0.495098 5.100000
0.638271 -0.856491 -0.277934 0.065570 0.395095 5.100000
0.614269 -0.858024 -0.202931 0.062110 0.295101 5.100000
0.597748 -0.859035 -0.127928 0.060439 0.195098 5.100000
0.588678 -0.859584 -0.052934 0.059890 0.095094 5.100000
0.587287 -0.859667 0.022067 0.059834 -0.004899 5.100000
0.593126 -0.859319 0.097069 0.059684 -0.104902 5.100000
0.606563 -0.858520 0.172072 0.058826 -0.204902 5.100000
0.627489 -0.857311 0.247064 0.056628 -0.304899 5.100000
0.655903 -0.855753 0.322067 0.052412 -0.404903 5.100000
0.691825 -0.853994 0.397116 0.045389 -0.504909 5.100000
0.734922 -0.852253 0.438200 0.034759 -0.592979 5.100000
0.775276 -0.851069 0.366415 0.023956 -0.593400 5.100000
0.808169 -0.850428 0.291413 0.015152 -0.593400 5.100000
0.833554 -0.850126 0.216410 0.008358 -0.593400 5.100000
0.851441 -0.850024 0.141412 0.003568 -0.593400 5.100000
