# Supplementary material for: Automatic Parking Controller with a Twin Artificial Neural Network Architecture
Source: Hindawi journal article supplement (doi:10.1155/2019/4801985), 2019-01-01
Supplement: f1 [file 4801985.f1.zip › data/data_254.txt]

6.900000 1.000000 0.000000 0.000000 0.000000 5.100000
6.896309 1.000000 -0.075000 0.000021 -0.005564 5.100000
6.884987 1.000000 -0.150000 0.000135 -0.016221 5.100000
6.866264 0.999997 -0.225000 0.000444 -0.030570 5.100000
6.839988 0.999972 -0.300000 0.001013 -0.044812 5.100000
6.806260 0.999923 -0.375000 0.001931 -0.058988 5.100000
6.764991 0.999821 -0.450000 0.003296 -0.073054 5.100000
6.716257 0.999615 -0.525000 0.005168 -0.087006 5.100000
6.659997 0.999257 -0.600000 0.007650 -0.100813 5.100000
6.596258 0.998668 -0.675000 0.010807 -0.114485 5.100000
6.525004 0.997765 -0.750000 0.014731 -0.128000 5.100000
6.446276 0.996424 -0.825000 0.019498 -0.141386 5.100000
6.360042 0.994495 -0.900000 0.025182 -0.154651 5.100000
6.266340 0.991833 -0.975000 0.031868 -0.167847 5.100000
6.165147 0.988213 -1.050000 0.039637 -0.181031 5.100000
6.056502 0.983432 -1.125000 0.048567 -0.194312 5.100000
5.940416 0.977199 -1.200000 0.058768 -0.207793 5.100000
5.816934 0.969231 -1.275000 0.070333 -0.221687 5.100000
5.686067 0.959163 -1.350000 0.083388 -0.236219 5.100000
5.547888 0.946608 -1.425000 0.098070 -0.251688 5.100000
5.402460 0.931103 -1.500000 0.114642 -0.271328 5.100000
5.249899 0.912098 -1.575000 0.133608 -0.296231 5.100000
5.090320 0.888910 -1.650000 0.155265 -0.320949 5.100000
4.923936 0.860815 -1.725000 0.179780 -0.345655 5.100000
4.750974 0.826948 -1.800000 0.207375 -0.374501 5.100000
4.571776 0.786331 -1.875000 0.239076 -0.422049 5.100000
4.386816 0.737631 -1.953499 0.277087 -0.500514 5.100000
4.197354 0.679018 -1.989727 0.324241 -0.543714 5.100000
4.009551 0.610543 -2.000000 0.375665 -0.570381 5.100000
3.825494 0.532353 -2.000000 0.427161 -0.541689 5.100000
3.645428 0.445356 -2.000000 0.471328 -0.458977 5.100000
3.468906 0.351347 -2.000000 0.505671 -0.357800 5.100000
3.295243 0.252161 -2.000000 0.530902 -0.257800 5.100000
3.123690 0.149321 -2.000000 0.547695 -0.157800 5.100000
2.954568 0.045042 -1.958856 0.556158 -0.057800 5.100000
2.791677 -0.056457 -1.881400 0.556693 0.042200 5.100000
2.634875 -0.153456 -1.806400 0.550136 0.142200 5.100000
2.483514 -0.245002 -1.731400 0.536422 0.242200 5.100000
2.337098 -0.330175 -1.656400 0.516247 0.342200 5.100000
2.195313 -0.408310 -1.581400 0.489654 0.442200 5.100000
2.057955 -0.478729 -1.506110 0.456782 0.545191 5.100000
1.924528 -0.541232 -1.439763 0.418477 0.593400 5.100000
1.795316 -0.595816 -1.365236 0.380936 0.593400 5.100000
1.671214 -0.642981 -1.290234 0.345390 0.593400 5.100000
1.552646 -0.683405 -1.215237 0.311865 0.593400 5.100000
1.440006 -0.717769 -1.140238 0.280344 0.593400 5.100000
1.333600 -0.746712 -1.065236 0.250825 0.593400 5.100000
1.233707 -0.770842 -0.990233 0.223320 0.593400 5.100000
1.140545 -0.790760 -0.915241 0.197818 0.593400 5.100000
1.054282 -0.807002 -0.840238 0.174325 0.593400 5.100000
0.975080 -0.820075 -0.765235 0.152835 0.593400 5.100000
0.903049 -0.830447 -0.690232 0.133358 0.593400 5.100000
0.838286 -0.838568 -0.615241 0.115891 0.593400 5.100000
0.780853 -0.844803 -0.540238 0.100428 0.593400 5.100000
0.730800 -0.849502 -0.465235 0.086966 0.593400 5.100000
0.688171 -0.852981 -0.390235 0.075791 0.546531 5.100000
0.652995 -0.855511 -0.315240 0.068193 0.444836 5.100000
0.625279 -0.857333 -0.240237 0.063567 0.344843 5.100000
0.605032 -0.858600 -0.165235 0.061084 0.244840 5.100000
0.592264 -0.859368 -0.090232 0.060057 0.144836 5.100000
0.587031 -0.859681 -0.015240 0.059846 0.044840 5.100000
0.589223 -0.859555 0.059763 0.059805 -0.055161 5.100000
0.598944 -0.858970 0.134766 0.059377 -0.155165 5.100000
0.616139 -0.857961 0.209765 0.057930 -0.255157 5.100000
0.640830 -0.856561 0.284761 0.054813 -0.355161 5.100000
0.673013 -0.854886 0.359763 0.049292 -0.455164 5.100000
0.712715 -0.853095 0.435316 0.040522 -0.555305 5.100000
0.756131 -0.851581 0.404338 0.029085 -0.593400 5.100000
0.792746 -0.850690 0.328719 0.019275 -0.593400 5.100000
0.821864 -0.850243 0.253716 0.011490 -0.593400 5.100000
0.843481 -0.850061 0.178713 0.005697 -0.593400 5.100000
0.857601 -0.850004 0.103722 0.001919 -0.593400 5.100000
