# Supplementary material for: Automatic Parking Controller with a Twin Artificial Neural Network Architecture
Source: Hindawi journal article supplement (doi:10.1155/2019/4801985), 2019-01-01
Supplement: f1 [file 4801985.f1.zip › data/data_255.txt]

7.000000 1.000000 0.000000 0.000000 0.000000 5.100000
6.996317 1.000000 -0.074998 0.000011 -0.004455 5.100000
6.984980 1.000000 -0.149996 0.000121 -0.012358 5.100000
6.966264 0.999998 -0.225005 0.000388 -0.024656 5.100000
6.939983 0.999982 -0.300003 0.000884 -0.036978 5.100000
6.906259 0.999937 -0.375001 0.001692 -0.049265 5.100000
6.864987 0.999841 -0.449999 0.002874 -0.061519 5.100000
6.816260 0.999663 -0.524997 0.004504 -0.073722 5.100000
6.759994 0.999353 -0.600003 0.006674 -0.085881 5.100000
6.696263 0.998839 -0.675004 0.009428 -0.097999 5.100000
6.625003 0.998046 -0.750002 0.012859 -0.110099 5.100000
6.546268 0.996881 -0.825000 0.017031 -0.122188 5.100000
6.460029 0.995195 -0.899998 0.022024 -0.134315 5.100000
6.366315 0.992863 -0.974996 0.027918 -0.146530 5.100000
6.265114 0.989692 -1.050005 0.034782 -0.158912 5.100000
6.156441 0.985486 -1.125003 0.042728 -0.171559 5.100000
6.040323 0.980000 -1.200001 0.051820 -0.184622 5.100000
5.916767 0.972955 -1.274999 0.062203 -0.198266 5.100000
5.785828 0.964043 -1.349997 0.073972 -0.212732 5.100000
5.647529 0.952882 -1.425004 0.087294 -0.228211 5.100000
5.501941 0.939049 -1.500003 0.102436 -0.247978 5.100000
5.349128 0.922018 -1.575002 0.119879 -0.272984 5.100000
5.189239 0.901164 -1.650000 0.139902 -0.297707 5.100000
5.022413 0.875762 -1.724998 0.162685 -0.322138 5.100000
4.848876 0.845019 -1.799997 0.188491 -0.352503 5.100000
4.668903 0.807966 -1.875005 0.218299 -0.399160 5.100000
4.482947 0.763320 -1.950080 0.254045 -0.469217 5.100000
4.292237 0.709361 -1.999797 0.298685 -0.536083 5.100000
4.102536 0.645721 -2.000000 0.349210 -0.559636 5.100000
3.916488 0.572402 -2.000000 0.401834 -0.571157 5.100000
3.734462 0.489581 -2.000000 0.450666 -0.506644 5.100000
3.556248 0.398849 -2.000000 0.489768 -0.407505 5.100000
3.381254 0.302007 -2.000000 0.519471 -0.307502 5.100000
3.208753 0.200811 -2.000000 0.540350 -0.207500 5.100000
3.037956 0.096697 -1.987727 0.553061 -0.107496 5.100000
2.871816 -0.006491 -1.918674 0.557287 -0.007505 5.100000
2.712091 -0.105876 -1.843676 0.554353 0.092498 5.100000
2.558090 -0.200242 -1.768678 0.544088 0.192500 5.100000
2.409269 -0.288689 -1.693680 0.527079 0.292503 5.100000
2.265220 -0.370390 -1.618671 0.503660 0.392495 5.100000
2.125671 -0.444735 -1.543673 0.473927 0.492498 5.100000
1.990491 -0.511127 -1.468590 0.437873 0.593376 5.100000
1.858927 -0.569660 -1.402590 0.399343 0.593400 5.100000
1.732226 -0.620424 -1.327510 0.362804 0.593400 5.100000
1.610858 -0.664116 -1.252507 0.328274 0.593400 5.100000
1.495226 -0.701408 -1.177515 0.295759 0.593400 5.100000
1.385687 -0.732964 -1.102512 0.265247 0.593400 5.100000
1.282527 -0.759413 -1.027509 0.236739 0.593400 5.100000
1.185990 -0.781356 -0.952508 0.210240 0.593400 5.100000
1.096282 -0.799358 -0.877514 0.185753 0.593400 5.100000
1.013558 -0.813943 -0.802512 0.163268 0.593400 5.100000
0.937946 -0.825604 -0.727509 0.142794 0.593400 5.100000
0.869564 -0.834791 -0.652514 0.124322 0.593400 5.100000
0.808475 -0.841917 -0.577514 0.107863 0.593400 5.100000
0.754751 -0.847335 -0.502511 0.093407 0.593400 5.100000
0.708430 -0.851391 -0.427508 0.080976 0.587475 5.100000
0.669548 -0.854353 -0.352517 0.071540 0.494538 5.100000
0.638116 -0.856501 -0.277514 0.065544 0.394535 5.100000
0.614156 -0.858031 -0.202511 0.062096 0.294541 5.100000
0.597677 -0.859039 -0.127508 0.060434 0.194538 5.100000
0.588648 -0.859586 -0.052514 0.059889 0.094534 5.100000
0.587299 -0.859667 0.022487 0.059834 -0.005459 5.100000
0.593182 -0.859316 0.097489 0.059681 -0.105462 5.100000
0.606659 -0.858514 0.172492 0.058818 -0.205462 5.100000
0.627628 -0.857303 0.247484 0.056611 -0.305459 5.100000
0.656083 -0.855744 0.322487 0.052381 -0.405463 5.100000
0.692047 -0.853984 0.397565 0.045340 -0.505476 5.100000
0.735167 -0.852245 0.438205 0.034694 -0.593081 5.100000
0.775481 -0.851064 0.365995 0.023901 -0.593400 5.100000
0.808332 -0.850426 0.290993 0.015109 -0.593400 5.100000
0.833676 -0.850125 0.215990 0.008325 -0.593400 5.100000
0.851521 -0.850023 0.140992 0.003547 -0.593400 5.100000
