# Supplementary material for: Automatic Parking Controller with a Twin Artificial Neural Network Architecture
Source: Hindawi journal article supplement (doi:10.1155/2019/4801985), 2019-01-01
Supplement: f1 [file 4801985.f1.zip › data/data_256.txt]

7.100000 1.000000 0.000000 0.000000 0.000000 5.100000
7.096326 1.000000 -0.075000 0.000008 -0.003597 5.100000
7.084980 1.000000 -0.150001 0.000108 -0.009526 5.100000
7.066273 0.999998 -0.225000 0.000339 -0.019399 5.100000
7.039991 0.999983 -0.300003 0.000774 -0.030087 5.100000
7.006266 0.999942 -0.374998 0.001470 -0.040728 5.100000
6.964994 0.999867 -0.450001 0.002506 -0.051382 5.100000
6.916254 0.999703 -0.525000 0.003923 -0.062049 5.100000
6.859998 0.999435 -0.600001 0.005814 -0.072755 5.100000
6.796252 0.998986 -0.675001 0.008219 -0.083515 5.100000
6.725008 0.998302 -0.750001 0.011213 -0.094340 5.100000
6.646254 0.997274 -0.825002 0.014874 -0.105267 5.100000
6.560026 0.995810 -0.899998 0.019264 -0.116355 5.100000
6.466288 0.993759 -0.975002 0.024455 -0.127663 5.100000
6.365088 0.990986 -1.049999 0.030535 -0.139254 5.100000
6.256397 0.987290 -1.125002 0.037595 -0.151256 5.100000
6.140249 0.982457 -1.200001 0.045721 -0.163806 5.100000
6.016654 0.976235 -1.275002 0.055028 -0.177064 5.100000
5.885650 0.968338 -1.350002 0.065647 -0.191275 5.100000
5.747247 0.958409 -1.424997 0.077731 -0.206586 5.100000
5.601517 0.946066 -1.500003 0.091526 -0.225956 5.100000
5.448536 0.930816 -1.574999 0.107518 -0.250551 5.100000
5.288377 0.912060 -1.650003 0.125992 -0.275270 5.100000
5.121204 0.889129 -1.725000 0.147128 -0.299843 5.100000
4.947171 0.861229 -1.800003 0.171135 -0.329846 5.100000
4.766558 0.827482 -1.875002 0.199009 -0.374393 5.100000
4.579697 0.786644 -1.953320 0.232348 -0.438321 5.100000
4.387676 0.737128 -1.991539 0.273770 -0.523213 5.100000
4.196570 0.678428 -2.000000 0.322950 -0.551030 5.100000
4.008631 0.610079 -2.000000 0.375154 -0.576696 5.100000
3.824557 0.531948 -2.000000 0.427219 -0.553582 5.100000
3.644511 0.444878 -2.000000 0.471560 -0.457488 5.100000
3.467995 0.350875 -2.000000 0.505806 -0.357239 5.100000
3.294364 0.251631 -2.000000 0.531054 -0.257243 5.100000
3.122804 0.148798 -1.999607 0.547692 -0.157239 5.100000
2.953655 0.044461 -1.958999 0.556398 -0.057241 5.100000
2.790780 -0.057001 -1.880976 0.556870 0.042759 5.100000
2.634016 -0.153992 -1.805980 0.550060 0.142763 5.100000
2.482677 -0.245497 -1.730985 0.536334 0.242757 5.100000
2.336294 -0.330637 -1.655978 0.516114 0.342760 5.100000
2.194528 -0.408725 -1.580984 0.489482 0.442765 5.100000
2.057208 -0.479101 -1.505624 0.456574 0.546394 5.100000
1.923791 -0.541559 -1.439413 0.418260 0.593400 5.100000
1.794606 -0.596100 -1.364816 0.380731 0.593400 5.100000
1.670535 -0.643226 -1.289814 0.345197 0.593400 5.100000
1.551999 -0.683614 -1.214817 0.311683 0.593400 5.100000
1.439393 -0.717946 -1.139818 0.280173 0.593400 5.100000
1.333023 -0.746860 -1.064816 0.250666 0.593400 5.100000
1.233167 -0.770965 -0.989813 0.223172 0.593400 5.100000
1.140043 -0.790860 -0.914821 0.197680 0.593400 5.100000
1.053819 -0.807083 -0.839818 0.174199 0.593400 5.100000
0.974657 -0.820140 -0.764815 0.152720 0.593400 5.100000
0.902666 -0.830499 -0.689812 0.133254 0.593400 5.100000
0.837944 -0.838608 -0.614821 0.115799 0.593400 5.100000
0.780552 -0.844833 -0.539818 0.100347 0.593400 5.100000
0.730541 -0.849525 -0.464815 0.086896 0.593400 5.100000
0.687953 -0.852997 -0.389815 0.075739 0.545985 5.100000
0.652820 -0.855523 -0.314820 0.068159 0.444276 5.100000
0.625145 -0.857341 -0.239817 0.063549 0.344283 5.100000
0.604940 -0.858605 -0.164815 0.061075 0.244280 5.100000
0.592214 -0.859371 -0.089812 0.060054 0.144276 5.100000
0.587021 -0.859681 -0.014820 0.059846 0.044280 5.100000
0.589259 -0.859553 0.060183 0.059804 -0.055721 5.100000
0.599021 -0.858966 0.135186 0.059373 -0.155725 5.100000
0.616257 -0.857954 0.210185 0.057917 -0.255717 5.100000
0.640990 -0.856552 0.285181 0.054789 -0.355721 5.100000
0.673214 -0.854876 0.360183 0.049253 -0.455724 5.100000
0.712956 -0.853085 0.435387 0.040463 -0.555772 5.100000
0.756357 -0.851575 0.403831 0.029024 -0.593400 5.100000
0.792930 -0.850686 0.328299 0.019226 -0.593400 5.100000
0.822006 -0.850242 0.253296 0.011452 -0.593400 5.100000
0.843582 -0.850060 0.178293 0.005670 -0.593400 5.100000
0.857660 -0.850004 0.103302 0.001903 -0.593400 5.100000
