# Supplementary material for: Automatic Parking Controller with a Twin Artificial Neural Network Architecture
Source: Hindawi journal article supplement (doi:10.1155/2019/4801985), 2019-01-01
Supplement: f1 [file 4801985.f1.zip › data/data_257.txt]

6.000000 1.100000 0.000000 0.000000 0.000000 5.100000
5.996253 1.100000 -0.074999 0.000053 -0.038757 5.100000
5.985024 1.099998 -0.149997 0.000387 -0.084040 5.100000
5.966249 1.099980 -0.224996 0.001285 -0.129562 5.100000
5.939995 1.099927 -0.300001 0.003018 -0.175582 5.100000
5.906257 1.099775 -0.375003 0.005891 -0.222307 5.100000
5.864997 1.099448 -0.450001 0.010203 -0.270047 5.100000
5.816254 1.098807 -0.525000 0.016313 -0.319242 5.100000
5.760020 1.097662 -0.599998 0.024609 -0.370713 5.100000
5.696290 1.095756 -0.674997 0.035547 -0.426041 5.100000
5.625116 1.092730 -0.749996 0.049751 -0.493454 5.100000
5.546506 1.088114 -0.824996 0.068043 -0.534674 5.100000
5.460513 1.081323 -0.900003 0.089635 -0.559116 5.100000
5.367256 1.071795 -0.975001 0.114295 -0.576331 5.100000
5.266834 1.058905 -1.050000 0.141192 -0.575966 5.100000
5.159401 1.042040 -1.124998 0.170065 -0.575755 5.100000
5.045152 1.020606 -1.199997 0.200938 -0.576114 5.100000
4.924323 0.993926 -1.274995 0.233808 -0.577224 5.100000
4.797195 0.961287 -1.349993 0.268677 -0.577886 5.100000
4.664132 0.922011 -1.425003 0.305508 -0.576229 5.100000
4.525546 0.875330 -1.500001 0.344185 -0.569168 5.100000
4.381817 0.820731 -1.575000 0.380703 -0.496002 5.100000
4.233150 0.758314 -1.649998 0.413444 -0.434790 5.100000
4.079675 0.688184 -1.724997 0.443073 -0.381449 5.100000
3.921502 0.610430 -1.799995 0.469829 -0.331304 5.100000
3.758699 0.525246 -1.874993 0.493667 -0.282596 5.100000
3.591273 0.432815 -1.950069 0.514489 -0.234310 5.100000
3.419570 0.333675 -1.999286 0.531961 -0.183644 5.100000
3.247887 0.230999 -2.000000 0.545248 -0.130531 5.100000
3.077408 0.126429 -1.999991 0.554402 -0.081111 5.100000
2.909927 0.022046 -1.936743 0.559530 -0.026203 5.100000
2.748986 -0.078715 -1.861245 0.558173 0.069330 5.100000
2.593932 -0.174715 -1.786246 0.549409 0.169328 5.100000
2.444146 -0.264968 -1.711237 0.533949 0.269326 5.100000
2.299197 -0.348651 -1.636239 0.512010 0.369335 5.100000
2.158784 -0.425094 -1.561241 0.483717 0.469332 5.100000
2.022782 -0.493673 -1.485412 0.449059 0.578039 5.100000
1.890438 -0.554364 -1.420849 0.410436 0.593400 5.100000
1.762666 -0.607168 -1.345142 0.373430 0.593400 5.100000
1.640108 -0.652733 -1.270141 0.338432 0.593400 5.100000
1.523182 -0.691730 -1.195141 0.305437 0.593400 5.100000
1.412251 -0.724828 -1.120140 0.274449 0.593400 5.100000
1.307625 -0.752657 -1.045140 0.245476 0.593400 5.100000
1.209568 -0.775826 -0.970139 0.218508 0.593400 5.100000
1.118274 -0.794902 -0.895139 0.193544 0.593400 5.100000
1.033932 -0.810426 -0.820138 0.170591 0.593400 5.100000
0.956675 -0.822910 -0.745138 0.149637 0.593400 5.100000
0.886604 -0.832791 -0.670137 0.130698 0.593400 5.100000
0.823815 -0.840507 -0.595137 0.113762 0.593400 5.100000
0.768363 -0.846430 -0.520137 0.098842 0.593400 5.100000
0.720305 -0.850878 -0.445136 0.085904 0.593400 5.100000
0.679669 -0.854157 -0.370136 0.075605 0.519015 5.100000
0.646495 -0.856556 -0.295135 0.068891 0.418427 5.100000
0.620797 -0.858274 -0.220145 0.064916 0.318425 5.100000
0.602575 -0.859440 -0.145144 0.062889 0.218429 5.100000
0.591834 -0.860116 -0.070144 0.062141 0.118432 5.100000
0.588570 -0.860310 0.004857 0.062020 0.018424 5.100000
0.592812 -0.860049 0.079857 0.061939 -0.081572 5.100000
0.604511 -0.859330 0.154858 0.061296 -0.181572 5.100000
0.623709 -0.858168 0.229858 0.059477 -0.281577 5.100000
0.650395 -0.856620 0.304859 0.055788 -0.381573 5.100000
0.684580 -0.854819 0.379859 0.049497 -0.481569 5.100000
0.726232 -0.852953 0.445959 0.039727 -0.573883 5.100000
0.769536 -0.851479 0.397240 0.028159 -0.593400 5.100000
0.805503 -0.850643 0.322240 0.018532 -0.593400 5.100000
0.833983 -0.850223 0.247239 0.010902 -0.593400 5.100000
0.854961 -0.850054 0.172239 0.005286 -0.593400 5.100000
0.868438 -0.850002 0.097238 0.001685 -0.593400 5.100000
