# Supplementary material for: Automatic Parking Controller with a Twin Artificial Neural Network Architecture
Source: Hindawi journal article supplement (doi:10.1155/2019/4801985), 2019-01-01
Supplement: f1 [file 4801985.f1.zip › data/data_258.txt]

6.100000 1.100000 0.000000 0.000000 0.000000 5.100000
6.096259 1.100000 -0.074998 0.000051 -0.033880 5.100000
6.085024 1.099999 -0.149999 0.000358 -0.075165 5.100000
6.066240 1.099981 -0.225003 0.001181 -0.116435 5.100000
6.040002 1.099938 -0.299997 0.002758 -0.157898 5.100000
6.006259 1.099800 -0.375002 0.005365 -0.199590 5.100000
5.964992 1.099500 -0.449997 0.009256 -0.241573 5.100000
5.916257 1.098920 -0.525000 0.014727 -0.283927 5.100000
5.860014 1.097892 -0.600004 0.022070 -0.326757 5.100000
5.796286 1.096186 -0.674998 0.031627 -0.370237 5.100000
5.725090 1.093513 -0.750000 0.043733 -0.414660 5.100000
5.646446 1.089484 -0.824997 0.058813 -0.460891 5.100000
5.560390 1.083641 -0.900002 0.077293 -0.498201 5.100000
5.467013 1.075403 -0.974995 0.098913 -0.522517 5.100000
5.366382 1.064171 -1.050000 0.123604 -0.547241 5.100000
5.258666 1.049269 -1.124999 0.151610 -0.571989 5.100000
5.144037 1.029959 -1.199999 0.182435 -0.575832 5.100000
5.022723 1.005498 -1.275004 0.215292 -0.575744 5.100000
4.895025 0.975244 -1.349996 0.250171 -0.576186 5.100000
4.761258 0.938444 -1.425001 0.286563 -0.563756 5.100000
4.621739 0.894573 -1.499995 0.321937 -0.513479 5.100000
4.476752 0.843466 -1.575000 0.355328 -0.469143 5.100000
4.326499 0.784935 -1.649995 0.386898 -0.427880 5.100000
4.171208 0.718906 -1.724999 0.416655 -0.388222 5.100000
4.011081 0.645299 -1.800001 0.444510 -0.349555 5.100000
3.846245 0.564094 -1.874997 0.470363 -0.311532 5.100000
3.676820 0.475354 -1.952189 0.494095 -0.274103 5.100000
3.503279 0.379415 -1.994723 0.515402 -0.233869 5.100000
3.330205 0.279230 -2.000000 0.533262 -0.189717 5.100000
3.158728 0.176263 -2.000000 0.547676 -0.148216 5.100000
2.988996 0.071481 -1.972287 0.557473 -0.078552 5.100000
2.825008 -0.031156 -1.897034 0.559470 0.021610 5.100000
2.667234 -0.129566 -1.822033 0.554463 0.121611 5.100000
2.514995 -0.222674 -1.747028 0.542148 0.221609 5.100000
2.367783 -0.309584 -1.672035 0.523273 0.321609 5.100000
2.225235 -0.389548 -1.597030 0.498009 0.421610 5.100000
2.087117 -0.461971 -1.522034 0.466438 0.521607 5.100000
1.953128 -0.526397 -1.451798 0.428890 0.593400 5.100000
1.823018 -0.582916 -1.380932 0.390841 0.593400 5.100000
1.697914 -0.631853 -1.305931 0.354880 0.593400 5.100000
1.578247 -0.673897 -1.230931 0.320933 0.593400 5.100000
1.464414 -0.709733 -1.155930 0.288993 0.593400 5.100000
1.356752 -0.739994 -1.080930 0.259057 0.593400 5.100000
1.255528 -0.765313 -1.005930 0.231127 0.593400 5.100000
1.160984 -0.786277 -0.930929 0.205204 0.593400 5.100000
1.073303 -0.803427 -0.855929 0.181295 0.593400 5.100000
0.992649 -0.817302 -0.780928 0.159386 0.593400 5.100000
0.919136 -0.828375 -0.705928 0.139486 0.593400 5.100000
0.852870 -0.837072 -0.630927 0.121600 0.593400 5.100000
0.793899 -0.843805 -0.555927 0.105708 0.593400 5.100000
0.742313 -0.848916 -0.480926 0.091833 0.593400 5.100000
0.698127 -0.852717 -0.405926 0.080050 0.565898 5.100000
0.661392 -0.855505 -0.330925 0.071696 0.466144 5.100000
0.632128 -0.857529 -0.255930 0.066524 0.366149 5.100000
0.610334 -0.858952 -0.180934 0.063658 0.266145 5.100000
0.596024 -0.859851 -0.105934 0.062384 0.166146 5.100000
0.589230 -0.860276 -0.030933 0.062037 0.066148 5.100000
0.589857 -0.860234 0.044067 0.062011 -0.033849 5.100000
0.597994 -0.859726 0.119067 0.061716 -0.133857 5.100000
0.613614 -0.858771 0.194068 0.060532 -0.233853 5.100000
0.636726 -0.857402 0.269068 0.057825 -0.333854 5.100000
0.667334 -0.855700 0.344069 0.052876 -0.433852 5.100000
0.705470 -0.853836 0.421878 0.044872 -0.536170 5.100000
0.749704 -0.852088 0.436854 0.033458 -0.585207 5.100000
0.789272 -0.850982 0.358030 0.022878 -0.593400 5.100000
0.821330 -0.850383 0.283029 0.014295 -0.593400 5.100000
0.845880 -0.850115 0.208029 0.007717 -0.593400 5.100000
0.862944 -0.850017 0.133028 0.003153 -0.593400 5.100000
