# Supplementary material for: Automatic Parking Controller with a Twin Artificial Neural Network Architecture
Source: Hindawi journal article supplement (doi:10.1155/2019/4801985), 2019-01-01
Supplement: f1 [file 4801985.f1.zip › data/data_259.txt]

6.200000 1.100000 0.000000 0.000000 0.000000 5.100000
6.196261 1.100000 -0.075000 0.000049 -0.030611 5.100000
6.185027 1.099999 -0.150001 0.000343 -0.069283 5.100000
6.166239 1.099982 -0.224999 0.001111 -0.107832 5.100000
6.140002 1.099942 -0.300001 0.002591 -0.146438 5.100000
6.106255 1.099812 -0.375002 0.005029 -0.185072 5.100000
6.064999 1.099531 -0.449998 0.008654 -0.223745 5.100000
6.016259 1.098987 -0.525003 0.013734 -0.262411 5.100000
5.960007 1.098033 -0.600002 0.020529 -0.301033 5.100000
5.896283 1.096451 -0.674997 0.029308 -0.339535 5.100000
5.825079 1.093980 -0.750004 0.040342 -0.377795 5.100000
5.746411 1.090276 -0.825001 0.053945 -0.416554 5.100000
5.660332 1.084932 -0.899997 0.070335 -0.443851 5.100000
5.566874 1.077464 -0.975004 0.089345 -0.468503 5.100000
5.466135 1.067342 -1.050001 0.111155 -0.493221 5.100000
5.358218 1.053963 -1.124996 0.135967 -0.517937 5.100000
5.243268 1.036604 -1.200004 0.164045 -0.542657 5.100000
5.121525 1.014492 -1.274999 0.195482 -0.560492 5.100000
4.993219 0.986854 -1.349996 0.228763 -0.548271 5.100000
4.858642 0.953095 -1.425003 0.262379 -0.523852 5.100000
4.718075 0.912797 -1.499999 0.295662 -0.494919 5.100000
4.571752 0.865568 -1.574996 0.328250 -0.464148 5.100000
4.419972 0.811150 -1.650003 0.359911 -0.432781 5.100000
4.262985 0.749279 -1.724998 0.390468 -0.401392 5.100000
4.101019 0.679772 -1.799997 0.419775 -0.370290 5.100000
3.934312 0.602526 -1.875002 0.447723 -0.339639 5.100000
3.763043 0.517406 -1.949998 0.474201 -0.309574 5.100000
3.587834 0.424666 -1.999864 0.498953 -0.276826 5.100000
3.413234 0.326971 -2.000000 0.520769 -0.238867 5.100000
3.240718 0.225791 -2.000000 0.539612 -0.204757 5.100000
3.069897 0.121717 -1.995730 0.553605 -0.127314 5.100000
2.902723 0.017537 -1.932950 0.559600 -0.026283 5.100000
2.742065 -0.083038 -1.857950 0.557890 0.073719 5.100000
2.587241 -0.178799 -1.782949 0.548904 0.173722 5.100000
2.437685 -0.268791 -1.707951 0.533117 0.273723 5.100000
2.292940 -0.352162 -1.632949 0.510895 0.373721 5.100000
2.152719 -0.428267 -1.557948 0.482344 0.473719 5.100000
2.016911 -0.496496 -1.482074 0.447389 0.582890 5.100000
1.884726 -0.556845 -1.417471 0.408770 0.593400 5.100000
1.757172 -0.609317 -1.341849 0.371851 0.593400 5.100000
1.634854 -0.654578 -1.266849 0.336942 0.593400 5.100000
1.518185 -0.693301 -1.191848 0.304036 0.593400 5.100000
1.407526 -0.726155 -1.116848 0.273134 0.593400 5.100000
1.303181 -0.753767 -1.041847 0.244249 0.593400 5.100000
1.205417 -0.776746 -0.966847 0.217370 0.593400 5.100000
1.114423 -0.795654 -0.891846 0.192494 0.593400 5.100000
1.030389 -0.811035 -0.816846 0.169629 0.593400 5.100000
0.953446 -0.823396 -0.741845 0.148764 0.593400 5.100000
0.883695 -0.833173 -0.666845 0.129913 0.593400 5.100000
0.821228 -0.840802 -0.591844 0.113065 0.593400 5.100000
0.766101 -0.846654 -0.516844 0.098234 0.593400 5.100000
0.718366 -0.851045 -0.441844 0.085385 0.593400 5.100000
0.678055 -0.854279 -0.366843 0.075239 0.514443 5.100000
0.645208 -0.856646 -0.291842 0.068664 0.414038 5.100000
0.619835 -0.858338 -0.216853 0.064791 0.314034 5.100000
0.601942 -0.859480 -0.141852 0.062834 0.214038 5.100000
0.591533 -0.860135 -0.066851 0.062127 0.114042 5.100000
0.588579 -0.860309 0.008149 0.062019 0.014034 5.100000
0.593163 -0.860027 0.083150 0.061928 -0.085963 5.100000
0.605199 -0.859289 0.158150 0.061245 -0.185961 5.100000
0.624727 -0.858108 0.233151 0.059358 -0.285967 5.100000
0.651742 -0.856545 0.308151 0.055571 -0.385963 5.100000
0.686255 -0.854737 0.383152 0.049147 -0.485960 5.100000
0.728225 -0.852874 0.445694 0.039204 -0.575057 5.100000
0.771271 -0.851431 0.393947 0.027695 -0.593400 5.100000
0.806905 -0.850618 0.318947 0.018157 -0.593400 5.100000
0.835058 -0.850211 0.243947 0.010613 -0.593400 5.100000
0.855711 -0.850050 0.168946 0.005085 -0.593400 5.100000
0.868864 -0.850002 0.093946 0.001572 -0.593400 5.100000
