# Supplementary material for: Automatic Parking Controller with a Twin Artificial Neural Network Architecture
Source: Hindawi journal article supplement (doi:10.1155/2019/4801985), 2019-01-01
Supplement: f1 [file 4801985.f1.zip › data/data_260.txt]

6.300000 1.100000 0.000000 0.000000 0.000000 5.100000
6.296267 1.100000 -0.075004 0.000042 -0.027576 5.100000
6.285025 1.099999 -0.149995 0.000320 -0.063862 5.100000
6.266238 1.099983 -0.224999 0.001051 -0.099928 5.100000
6.240008 1.099946 -0.300002 0.002433 -0.135959 5.100000
6.206251 1.099824 -0.374995 0.004714 -0.171906 5.100000
6.165002 1.099559 -0.449998 0.008112 -0.207718 5.100000
6.116264 1.099050 -0.525001 0.012847 -0.243312 5.100000
6.060005 1.098155 -0.600005 0.019152 -0.278578 5.100000
5.996281 1.096686 -0.674996 0.027273 -0.313357 5.100000
5.925063 1.094384 -0.750000 0.037442 -0.347731 5.100000
5.846392 1.090955 -0.825003 0.049851 -0.375497 5.100000
5.760290 1.086039 -0.899995 0.064495 -0.400072 5.100000
5.666784 1.079207 -0.974999 0.081511 -0.424794 5.100000
5.565957 1.069997 -1.050002 0.101099 -0.449511 5.100000
5.457887 1.057816 -1.124996 0.123481 -0.474235 5.100000
5.342719 1.042061 -1.199998 0.148863 -0.498466 5.100000
5.220611 1.022005 -1.275001 0.176916 -0.507559 5.100000
5.091767 0.996966 -1.350004 0.206799 -0.505430 5.100000
4.956450 0.966377 -1.424996 0.237854 -0.494942 5.100000
4.814879 0.929648 -1.500000 0.269513 -0.478411 5.100000
4.667363 0.886350 -1.575003 0.301319 -0.458095 5.100000
4.514177 0.836037 -1.649996 0.332936 -0.435629 5.100000
4.355582 0.778379 -1.724999 0.364121 -0.412180 5.100000
4.191892 0.713090 -1.800002 0.394697 -0.388547 5.100000
4.023352 0.639865 -1.874996 0.424567 -0.365282 5.100000
3.850253 0.558535 -1.952653 0.453667 -0.343111 5.100000
3.673238 0.469081 -1.990530 0.481731 -0.317319 5.100000
3.497295 0.374147 -2.000000 0.507349 -0.285520 5.100000
3.323633 0.274942 -2.000000 0.530176 -0.251528 5.100000
3.152056 0.172169 -2.000000 0.547828 -0.172105 5.100000
2.982447 0.067395 -1.972880 0.557759 -0.074446 5.100000
2.818688 -0.035127 -1.894074 0.559570 0.025548 5.100000
2.661130 -0.133344 -1.819077 0.554078 0.125551 5.100000
2.509106 -0.226213 -1.744078 0.541555 0.225554 5.100000
2.362084 -0.312879 -1.669075 0.522393 0.325549 5.100000
2.219710 -0.392553 -1.594075 0.496881 0.425554 5.100000
2.081764 -0.464663 -1.519080 0.465060 0.525548 5.100000
1.947909 -0.528779 -1.449634 0.427341 0.593400 5.100000
1.817991 -0.584984 -1.377977 0.389386 0.593400 5.100000
1.693094 -0.633635 -1.302976 0.353504 0.593400 5.100000
1.573650 -0.675422 -1.227976 0.319637 0.593400 5.100000
1.460055 -0.711026 -1.152975 0.287775 0.593400 5.100000
1.352641 -0.741081 -1.077975 0.257919 0.593400 5.100000
1.251676 -0.766218 -1.002975 0.230068 0.593400 5.100000
1.157397 -0.787022 -0.927974 0.204224 0.593400 5.100000
1.069991 -0.804034 -0.852974 0.180394 0.593400 5.100000
0.989617 -0.817789 -0.777973 0.158563 0.593400 5.100000
0.916387 -0.828759 -0.702973 0.138743 0.593400 5.100000
0.850409 -0.837372 -0.627972 0.120936 0.593400 5.100000
0.791729 -0.844035 -0.552972 0.105125 0.593400 5.100000
0.740433 -0.849088 -0.477971 0.091327 0.593400 5.100000
0.696538 -0.852844 -0.402971 0.079645 0.561822 5.100000
0.660096 -0.855598 -0.327970 0.071438 0.462204 5.100000
0.631124 -0.857595 -0.252975 0.066371 0.362209 5.100000
0.609625 -0.858997 -0.177979 0.063580 0.262205 5.100000
0.595609 -0.859877 -0.102979 0.062357 0.162207 5.100000
0.589144 -0.860280 -0.027978 0.062035 0.062207 5.100000
0.590004 -0.860226 0.047022 0.062009 -0.037789 5.100000
0.598465 -0.859697 0.122022 0.061692 -0.137797 5.100000
0.614385 -0.858723 0.197023 0.060459 -0.237793 5.100000
0.637792 -0.857340 0.272023 0.057675 -0.337793 5.100000
0.668696 -0.855628 0.347024 0.052623 -0.437792 5.100000
0.707135 -0.853761 0.425809 0.044477 -0.540914 5.100000
0.751399 -0.852032 0.434438 0.033006 -0.586247 5.100000
0.790675 -0.850950 0.355075 0.022502 -0.593400 5.100000
0.822435 -0.850368 0.280074 0.013999 -0.593400 5.100000
0.846692 -0.850109 0.205074 0.007499 -0.593400 5.100000
0.863464 -0.850015 0.130073 0.003014 -0.593400 5.100000
