# Supplementary material for: Automatic Parking Controller with a Twin Artificial Neural Network Architecture
Source: Hindawi journal article supplement (doi:10.1155/2019/4801985), 2019-01-01
Supplement: f1 [file 4801985.f1.zip › data/data_261.txt]

6.400000 1.100000 0.000000 0.000000 0.000000 5.100000
6.396273 1.100000 -0.074995 0.000040 -0.024448 5.100000
6.385027 1.100000 -0.150003 0.000297 -0.058299 5.100000
6.366236 1.099983 -0.224998 0.000981 -0.091846 5.100000
6.340016 1.099950 -0.299997 0.002284 -0.125273 5.100000
6.306242 1.099835 -0.375000 0.004408 -0.158527 5.100000
6.265004 1.099585 -0.449996 0.007556 -0.191515 5.100000
6.216250 1.099118 -0.525003 0.011948 -0.224138 5.100000
6.160012 1.098284 -0.599999 0.017784 -0.256226 5.100000
6.096282 1.096921 -0.674996 0.025259 -0.287609 5.100000
6.025054 1.094792 -0.750001 0.034549 -0.313890 5.100000
5.946377 1.091639 -0.824996 0.045711 -0.338583 5.100000
5.860237 1.087143 -0.900002 0.058897 -0.363298 5.100000
5.766700 1.080912 -0.974999 0.074295 -0.388025 5.100000
5.665801 1.072510 -1.049995 0.092098 -0.412740 5.100000
5.557612 1.061420 -1.125002 0.112520 -0.437512 5.100000
5.442267 1.047055 -1.199997 0.135488 -0.453615 5.100000
5.319862 1.028801 -1.275001 0.160650 -0.462601 5.100000
5.190612 1.006063 -1.349999 0.187692 -0.465360 5.100000
5.054682 0.978231 -1.424995 0.216244 -0.462716 5.100000
4.912331 0.944734 -1.500002 0.245916 -0.455031 5.100000
4.763799 0.905033 -1.574997 0.276344 -0.443551 5.100000
4.609371 0.858633 -1.650000 0.307222 -0.429576 5.100000
4.449353 0.805098 -1.725000 0.338311 -0.414219 5.100000
4.284032 0.743992 -1.799995 0.369469 -0.398415 5.100000
4.113755 0.674975 -1.875002 0.400594 -0.382972 5.100000
3.938833 0.597644 -1.950168 0.431669 -0.368652 5.100000
3.760123 0.511929 -2.000000 0.462466 -0.351195 5.100000
3.582387 0.420040 -2.000000 0.491425 -0.324991 5.100000
3.407357 0.323279 -2.000000 0.518150 -0.296843 5.100000
3.234770 0.222239 -2.000000 0.540062 -0.223719 5.100000
3.063913 0.118008 -1.994611 0.553998 -0.122803 5.100000
2.897025 0.013979 -1.930485 0.559429 -0.022797 5.100000
2.736583 -0.086459 -1.855340 0.557611 0.077197 5.100000
2.581954 -0.182039 -1.780339 0.548452 0.177202 5.100000
2.432570 -0.271802 -1.705338 0.532465 0.277197 5.100000
2.287983 -0.354944 -1.630342 0.510000 0.377202 5.100000
2.147920 -0.430774 -1.555335 0.481244 0.477197 5.100000
2.012261 -0.498724 -1.479475 0.446061 0.586199 5.100000
1.880204 -0.558800 -1.414769 0.407451 0.593400 5.100000
1.752824 -0.611010 -1.339239 0.370602 0.593400 5.100000
1.630696 -0.656032 -1.264239 0.335763 0.593400 5.100000
1.514231 -0.694539 -1.189238 0.302927 0.593400 5.100000
1.403788 -0.727199 -1.114238 0.272096 0.593400 5.100000
1.299667 -0.754641 -1.039237 0.243280 0.593400 5.100000
1.202135 -0.777470 -0.964237 0.216471 0.593400 5.100000
1.111380 -0.796246 -0.889236 0.191665 0.593400 5.100000
1.027591 -0.811513 -0.814236 0.168869 0.593400 5.100000
0.950896 -0.823778 -0.739235 0.148074 0.593400 5.100000
0.881399 -0.833472 -0.664235 0.129293 0.593400 5.100000
0.819186 -0.841033 -0.589234 0.112515 0.593400 5.100000
0.764318 -0.846829 -0.514234 0.097754 0.593400 5.100000
0.716839 -0.851175 -0.439234 0.084979 0.593400 5.100000
0.676787 -0.854375 -0.364233 0.074954 0.510825 5.100000
0.644197 -0.856715 -0.289232 0.068488 0.410558 5.100000
0.619083 -0.858387 -0.214243 0.064694 0.310554 5.100000
0.601449 -0.859510 -0.139242 0.062792 0.210558 5.100000
0.591298 -0.860150 -0.064241 0.062117 0.110561 5.100000
0.588605 -0.860308 0.010759 0.062018 0.010555 5.100000
0.593444 -0.860009 0.085760 0.061920 -0.089443 5.100000
0.605752 -0.859256 0.160760 0.061203 -0.189441 5.100000
0.625543 -0.858060 0.235761 0.059262 -0.289447 5.100000
0.652820 -0.856485 0.310761 0.055396 -0.389444 5.100000
0.687594 -0.854672 0.385762 0.048865 -0.489440 5.100000
0.729814 -0.852811 0.445430 0.038784 -0.575905 5.100000
0.772637 -0.851394 0.391337 0.027330 -0.593400 5.100000
0.808008 -0.850598 0.316337 0.017861 -0.593400 5.100000
0.835898 -0.850203 0.241337 0.010388 -0.593400 5.100000
0.856293 -0.850047 0.166336 0.004929 -0.593400 5.100000
0.869189 -0.850001 0.091336 0.001485 -0.593400 5.100000
