# Supplementary material for: Automatic Parking Controller with a Twin Artificial Neural Network Architecture
Source: Hindawi journal article supplement (doi:10.1155/2019/4801985), 2019-01-01
Supplement: f1 [file 4801985.f1.zip › data/data_262.txt]

6.500000 1.100000 0.000000 -0.000000 0.000000 5.100000
6.496282 1.100000 -0.074999 0.000039 -0.021189 5.100000
6.485023 1.100000 -0.149999 0.000286 -0.052476 5.100000
6.466242 1.099984 -0.224998 0.000913 -0.083407 5.100000
6.440017 1.099953 -0.299998 0.002112 -0.114166 5.100000
6.406241 1.099845 -0.374997 0.004082 -0.144687 5.100000
6.365008 1.099621 -0.449997 0.006984 -0.174852 5.100000
6.316251 1.099181 -0.524996 0.011028 -0.204600 5.100000
6.260009 1.098412 -0.599995 0.016374 -0.232555 5.100000
6.196270 1.097158 -0.675005 0.023165 -0.257336 5.100000
6.125045 1.095220 -0.750004 0.031501 -0.282062 5.100000
6.046350 1.092352 -0.825004 0.041562 -0.306778 5.100000
5.960195 1.088262 -0.900003 0.053518 -0.331503 5.100000
5.866621 1.082604 -0.975002 0.067558 -0.356229 5.100000
5.765660 1.074949 -1.050002 0.083847 -0.380166 5.100000
5.657384 1.064857 -1.125001 0.102374 -0.397943 5.100000
5.541867 1.051789 -1.200001 0.123036 -0.411982 5.100000
5.419237 1.035218 -1.275000 0.145716 -0.422149 5.100000
5.289626 1.014572 -1.350000 0.170268 -0.428298 5.100000
5.153198 0.989285 -1.424999 0.196471 -0.430290 5.100000
5.010177 0.958758 -1.499998 0.224085 -0.429005 5.100000
4.860785 0.922427 -1.574998 0.252882 -0.424639 5.100000
4.705287 0.879769 -1.649997 0.282642 -0.418185 5.100000
4.543978 0.830222 -1.724997 0.313196 -0.410530 5.100000
4.377188 0.773310 -1.799996 0.344452 -0.402610 5.100000
4.205249 0.708493 -1.874995 0.376368 -0.395295 5.100000
4.028549 0.635305 -1.952726 0.409033 -0.389818 5.100000
3.847918 0.553390 -1.989577 0.442276 -0.380297 5.100000
3.668642 0.464931 -2.000000 0.474283 -0.361776 5.100000
3.492148 0.370870 -2.000000 0.504671 -0.343734 5.100000
3.318400 0.271825 -2.000000 0.530317 -0.266209 5.100000
3.146846 0.169008 -1.999873 0.548203 -0.171434 5.100000
2.977415 0.064242 -1.967450 0.558012 -0.071431 5.100000
2.813838 -0.038148 -1.891809 0.559628 0.028574 5.100000
2.656467 -0.136236 -1.816810 0.553766 0.128567 5.100000
2.504593 -0.228926 -1.741810 0.541074 0.228572 5.100000
2.357716 -0.315384 -1.666811 0.521715 0.328565 5.100000
2.215487 -0.394845 -1.591812 0.496016 0.428570 5.100000
2.077674 -0.466708 -1.516812 0.464006 0.528574 5.100000
1.943913 -0.530597 -1.447959 0.426154 0.593400 5.100000
1.814143 -0.586560 -1.375712 0.388273 0.593400 5.100000
1.689404 -0.634995 -1.300711 0.352452 0.593400 5.100000
1.570132 -0.676584 -1.225711 0.318645 0.593400 5.100000
1.456720 -0.712011 -1.150710 0.286844 0.593400 5.100000
1.349497 -0.741908 -1.075710 0.257049 0.593400 5.100000
1.248731 -0.766906 -1.000710 0.229258 0.593400 5.100000
1.154656 -0.787588 -0.925709 0.203474 0.593400 5.100000
1.067460 -0.804495 -0.850709 0.179705 0.593400 5.100000
0.987300 -0.818159 -0.775708 0.157935 0.593400 5.100000
0.914287 -0.829052 -0.700708 0.138175 0.593400 5.100000
0.848529 -0.837600 -0.625707 0.120429 0.593400 5.100000
0.790073 -0.844209 -0.550707 0.104679 0.593400 5.100000
0.739001 -0.849219 -0.475706 0.090942 0.593400 5.100000
0.695328 -0.852940 -0.400706 0.079340 0.558767 5.100000
0.659110 -0.855669 -0.325705 0.071243 0.459184 5.100000
0.630363 -0.857645 -0.250711 0.066256 0.359188 5.100000
0.609088 -0.859031 -0.175714 0.063522 0.259186 5.100000
0.595296 -0.859897 -0.100714 0.062336 0.159187 5.100000
0.589080 -0.860284 -0.025713 0.062033 0.059187 5.100000
0.590131 -0.860218 0.049287 0.062007 -0.040809 5.100000
0.598830 -0.859674 0.124287 0.061672 -0.140817 5.100000
0.614982 -0.858687 0.199288 0.060402 -0.240813 5.100000
0.638617 -0.857292 0.274288 0.057559 -0.340813 5.100000
0.669747 -0.855573 0.349289 0.052426 -0.440811 5.100000
0.708420 -0.853704 0.428772 0.044170 -0.544510 5.100000
0.752694 -0.851989 0.432313 0.032661 -0.587054 5.100000
0.791743 -0.850926 0.352810 0.022216 -0.593400 5.100000
0.823274 -0.850356 0.277809 0.013774 -0.593400 5.100000
0.847305 -0.850105 0.202809 0.007335 -0.593400 5.100000
0.863853 -0.850014 0.127808 0.002910 -0.593400 5.100000
