# Supplementary material for: Automatic Parking Controller with a Twin Artificial Neural Network Architecture
Source: Hindawi journal article supplement (doi:10.1155/2019/4801985), 2019-01-01
Supplement: f1 [file 4801985.f1.zip › data/data_263.txt]

6.600000 1.100000 0.000000 0.000000 0.000000 5.100000
6.596288 1.100000 -0.075000 0.000037 -0.017937 5.100000
6.585013 1.100000 -0.150001 0.000265 -0.046782 5.100000
6.566242 1.099984 -0.225001 0.000845 -0.075171 5.100000
6.540007 1.099956 -0.300002 0.001959 -0.103355 5.100000
6.506241 1.099855 -0.375002 0.003766 -0.131354 5.100000
6.465009 1.099645 -0.450002 0.006438 -0.157779 5.100000
6.416250 1.099247 -0.525003 0.010107 -0.182437 5.100000
6.360008 1.098553 -0.600003 0.014909 -0.207162 5.100000
6.296266 1.097402 -0.675003 0.021022 -0.231875 5.100000
6.225043 1.095648 -0.750004 0.028587 -0.256600 5.100000
6.146330 1.093039 -0.824995 0.037784 -0.281313 5.100000
6.060166 1.089320 -0.899995 0.048771 -0.305638 5.100000
5.966550 1.084153 -0.974995 0.061644 -0.326511 5.100000
5.865551 1.077178 -1.049995 0.076413 -0.345002 5.100000
5.757190 1.067981 -1.124996 0.093134 -0.361189 5.100000
5.641547 1.056102 -1.199996 0.111778 -0.374814 5.100000
5.518727 1.041042 -1.274997 0.132311 -0.385668 5.100000
5.388819 1.022282 -1.349997 0.154659 -0.393686 5.100000
5.252006 0.999273 -1.424997 0.178689 -0.398958 5.100000
5.108424 0.971437 -1.499998 0.204291 -0.401794 5.100000
4.958316 0.938226 -1.574998 0.231313 -0.402572 5.100000
4.801899 0.899034 -1.649998 0.259656 -0.402045 5.100000
4.639478 0.853314 -1.724999 0.289239 -0.400885 5.100000
4.471345 0.800438 -1.799999 0.320045 -0.399930 5.100000
4.297883 0.739856 -1.875000 0.352145 -0.400219 5.100000
4.119499 0.670893 -1.950312 0.385704 -0.403086 5.100000
3.937205 0.593134 -2.000000 0.420688 -0.403393 5.100000
3.756017 0.508266 -2.000000 0.455247 -0.391317 5.100000
3.577905 0.417304 -2.000000 0.488852 -0.379559 5.100000
3.402805 0.320677 -2.000000 0.518544 -0.313293 5.100000
3.230273 0.219523 -2.000000 0.540557 -0.220605 5.100000
3.059598 0.115348 -1.996605 0.554179 -0.120180 5.100000
2.892739 0.011287 -1.928874 0.559575 -0.020181 5.100000
2.732455 -0.089022 -1.853377 0.557564 0.079821 5.100000
2.577974 -0.184478 -1.778377 0.548098 0.179820 5.100000
2.428716 -0.274060 -1.703376 0.531970 0.279821 5.100000
2.284258 -0.357032 -1.628376 0.509320 0.379818 5.100000
2.144315 -0.432656 -1.553375 0.480406 0.479821 5.100000
2.008762 -0.500395 -1.477554 0.445059 0.588334 5.100000
1.876803 -0.560267 -1.412727 0.406460 0.593400 5.100000
1.749555 -0.612279 -1.337274 0.369663 0.593400 5.100000
1.627569 -0.657121 -1.262274 0.334877 0.593400 5.100000
1.511259 -0.695467 -1.187273 0.302094 0.593400 5.100000
1.400979 -0.727981 -1.112273 0.271315 0.593400 5.100000
1.297027 -0.755294 -1.037272 0.242552 0.593400 5.100000
1.199670 -0.778011 -0.962272 0.215795 0.593400 5.100000
1.109095 -0.796688 -0.887271 0.191042 0.593400 5.100000
1.025489 -0.811871 -0.812271 0.168299 0.593400 5.100000
0.948982 -0.824063 -0.737270 0.147556 0.593400 5.100000
0.879675 -0.833696 -0.662270 0.128829 0.593400 5.100000
0.817654 -0.841206 -0.587269 0.112103 0.593400 5.100000
0.762981 -0.846959 -0.512269 0.097395 0.593400 5.100000
0.715696 -0.851272 -0.437269 0.084676 0.593400 5.100000
0.675838 -0.854446 -0.362268 0.074743 0.508112 5.100000
0.643443 -0.856767 -0.287267 0.068358 0.407938 5.100000
0.618523 -0.858424 -0.212278 0.064623 0.307934 5.100000
0.601084 -0.859533 -0.137277 0.062762 0.207938 5.100000
0.591124 -0.860161 -0.062276 0.062109 0.107941 5.100000
0.588635 -0.860306 0.012724 0.062018 0.007935 5.100000
0.593660 -0.859996 0.087725 0.061913 -0.092063 5.100000
0.606172 -0.859230 0.162725 0.061171 -0.192061 5.100000
0.626163 -0.858024 0.237726 0.059188 -0.292068 5.100000
0.653637 -0.856440 0.312726 0.055262 -0.392064 5.100000
0.688607 -0.854623 0.387727 0.048649 -0.492060 5.100000
0.731013 -0.852765 0.445201 0.038465 -0.576502 5.100000
0.773660 -0.851367 0.389372 0.027056 -0.593400 5.100000
0.808834 -0.850583 0.314372 0.017640 -0.593400 5.100000
0.836523 -0.850197 0.239371 0.010221 -0.593400 5.100000
0.856724 -0.850044 0.164371 0.004814 -0.593400 5.100000
0.869426 -0.850001 0.089371 0.001421 -0.593400 5.100000
