# Supplementary material for: Automatic Parking Controller with a Twin Artificial Neural Network Architecture
Source: Hindawi journal article supplement (doi:10.1155/2019/4801985), 2019-01-01
Supplement: f1 [file 4801985.f1.zip › data/data_264.txt]

6.700000 1.100000 0.000000 0.000000 0.000000 5.100000
6.696295 1.100000 -0.074999 0.000032 -0.015375 5.100000
6.685007 1.100000 -0.149998 0.000246 -0.041025 5.100000
6.666249 1.099985 -0.224997 0.000775 -0.065990 5.100000
6.640005 1.099958 -0.299996 0.001787 -0.090718 5.100000
6.606251 1.099869 -0.374995 0.003405 -0.115436 5.100000
6.565003 1.099686 -0.450005 0.005807 -0.140151 5.100000
6.516247 1.099317 -0.525003 0.009127 -0.164847 5.100000
6.460011 1.098691 -0.600002 0.013531 -0.189447 5.100000
6.396266 1.097646 -0.675001 0.019158 -0.213390 5.100000
6.325040 1.096041 -0.750001 0.026134 -0.235839 5.100000
6.246313 1.093653 -0.825000 0.034573 -0.257183 5.100000
6.160143 1.090258 -0.899999 0.044566 -0.277272 5.100000
6.066502 1.085534 -0.974998 0.056214 -0.295911 5.100000
5.965462 1.079180 -1.049997 0.069574 -0.312912 5.100000
5.857029 1.070805 -1.124996 0.084697 -0.328102 5.100000
5.741284 1.060007 -1.199997 0.101587 -0.341328 5.100000
5.618287 1.046315 -1.275004 0.120235 -0.352543 5.100000
5.488168 1.029261 -1.350003 0.140612 -0.361746 5.100000
5.350999 1.008302 -1.425002 0.162678 -0.369069 5.100000
5.206985 0.982924 -1.500001 0.186354 -0.374785 5.100000
5.056264 0.952537 -1.575000 0.211604 -0.379273 5.100000
4.899082 0.916577 -1.649999 0.238386 -0.383109 5.100000
4.735684 0.874416 -1.724998 0.266712 -0.386950 5.100000
4.566391 0.825437 -1.799997 0.296656 -0.391674 5.100000
4.391543 0.768949 -1.874996 0.328377 -0.398329 5.100000
4.211559 0.704238 -1.952965 0.362198 -0.408995 5.100000
4.027377 0.630646 -1.989088 0.398207 -0.416097 5.100000
3.844552 0.549813 -2.000000 0.434472 -0.413015 5.100000
3.664687 0.462355 -2.000000 0.470810 -0.415893 5.100000
3.488058 0.368562 -2.000000 0.504539 -0.362829 5.100000
3.314350 0.269447 -2.000000 0.530870 -0.269076 5.100000
3.142810 0.166542 -2.000000 0.548557 -0.169050 5.100000
2.973393 0.061742 -1.964823 0.558046 -0.069052 5.100000
2.810028 -0.040546 -1.890027 0.559402 0.030947 5.100000
2.652784 -0.138504 -1.815023 0.553565 0.130946 5.100000
2.501038 -0.231061 -1.740024 0.540676 0.230955 5.100000
2.354275 -0.317360 -1.665025 0.521185 0.330953 5.100000
2.212152 -0.396648 -1.590026 0.495321 0.430952 5.100000
2.074442 -0.468321 -1.515009 0.463168 0.531135 5.100000
1.940767 -0.532023 -1.446622 0.425220 0.593400 5.100000
1.811113 -0.587798 -1.373927 0.387397 0.593400 5.100000
1.686500 -0.636062 -1.298926 0.351624 0.593400 5.100000
1.567363 -0.677496 -1.223926 0.317864 0.593400 5.100000
1.454095 -0.712784 -1.148925 0.286111 0.593400 5.100000
1.347023 -0.742557 -1.073925 0.256365 0.593400 5.100000
1.246414 -0.767446 -0.998925 0.228622 0.593400 5.100000
1.152500 -0.788032 -0.923924 0.202885 0.593400 5.100000
1.065469 -0.804856 -0.848924 0.179164 0.593400 5.100000
0.985478 -0.818449 -0.773923 0.157441 0.593400 5.100000
0.912637 -0.829280 -0.698923 0.137729 0.593400 5.100000
0.847053 -0.837778 -0.623922 0.120030 0.593400 5.100000
0.788772 -0.844346 -0.548922 0.104329 0.593400 5.100000
0.737877 -0.849321 -0.473921 0.090640 0.593400 5.100000
0.694380 -0.853015 -0.398921 0.079103 0.556430 5.100000
0.658338 -0.855723 -0.323920 0.071092 0.456804 5.100000
0.629769 -0.857684 -0.248927 0.066167 0.356808 5.100000
0.608671 -0.859057 -0.173929 0.063477 0.256806 5.100000
0.595054 -0.859912 -0.098929 0.062321 0.156808 5.100000
0.589031 -0.860286 -0.023928 0.062032 0.056807 5.100000
0.590240 -0.860211 0.051072 0.062006 -0.043189 5.100000
0.599121 -0.859656 0.126073 0.061657 -0.143197 5.100000
0.615457 -0.858658 0.201073 0.060356 -0.243194 5.100000
0.639271 -0.857254 0.276073 0.057466 -0.343192 5.100000
0.670580 -0.855529 0.351074 0.052269 -0.443191 5.100000
0.709436 -0.853659 0.431045 0.043925 -0.547293 5.100000
0.753711 -0.851956 0.430496 0.032389 -0.587687 5.100000
0.792580 -0.850908 0.351025 0.021992 -0.593400 5.100000
0.823931 -0.850347 0.276024 0.013598 -0.593400 5.100000
0.847781 -0.850101 0.201024 0.007208 -0.593400 5.100000
0.864153 -0.850013 0.126023 0.002830 -0.593400 5.100000
