# Supplementary material for: Automatic Parking Controller with a Twin Artificial Neural Network Architecture
Source: Hindawi journal article supplement (doi:10.1155/2019/4801985), 2019-01-01
Supplement: f1 [file 4801985.f1.zip › data/data_265.txt]

6.800000 1.100000 0.000000 0.000000 0.000000 5.100000
6.796299 1.100000 -0.074999 0.000031 -0.011951 5.100000
6.784994 1.100000 -0.149998 0.000218 -0.034393 5.100000
6.766256 1.099986 -0.225003 0.000699 -0.058083 5.100000
6.739994 1.099960 -0.299997 0.001617 -0.081571 5.100000
6.706253 1.099887 -0.375001 0.003108 -0.104779 5.100000
6.664996 1.099714 -0.450005 0.005315 -0.127620 5.100000
6.616250 1.099383 -0.524999 0.008358 -0.149992 5.100000
6.560001 1.098797 -0.600003 0.012385 -0.171796 5.100000
6.496266 1.097850 -0.674997 0.017503 -0.192909 5.100000
6.425029 1.096381 -0.750002 0.023839 -0.213209 5.100000
6.346308 1.094209 -0.825001 0.031480 -0.232570 5.100000
6.260108 1.091106 -0.900000 0.040542 -0.250850 5.100000
6.166459 1.086827 -0.974999 0.051089 -0.267915 5.100000
6.065375 1.081048 -1.049999 0.063190 -0.283656 5.100000
5.956896 1.073449 -1.125004 0.076885 -0.297977 5.100000
5.841057 1.063640 -1.199997 0.092216 -0.310825 5.100000
5.717937 1.051211 -1.275002 0.109180 -0.322194 5.100000
5.587603 1.035704 -1.350005 0.127802 -0.332160 5.100000
5.450176 1.016641 -1.424999 0.148048 -0.340877 5.100000
5.305768 0.993485 -1.500004 0.169932 -0.348635 5.100000
5.154552 0.965724 -1.575002 0.193453 -0.355792 5.100000
4.996717 0.932735 -1.650003 0.218648 -0.362887 5.100000
4.832492 0.893941 -1.725000 0.245580 -0.370580 5.100000
4.662167 0.848642 -1.800001 0.274413 -0.379754 5.100000
4.486091 0.796145 -1.875006 0.305384 -0.391561 5.100000
4.304668 0.735620 -1.950268 0.338925 -0.407859 5.100000
4.118978 0.666376 -2.000000 0.375275 -0.422984 5.100000
3.934210 0.589572 -2.000000 0.412710 -0.427230 5.100000
3.752572 0.505900 -2.000000 0.451010 -0.439293 5.100000
3.574285 0.415298 -2.000000 0.488518 -0.401982 5.100000
3.399207 0.318631 -2.000000 0.519080 -0.319340 5.100000
3.226732 0.217389 -2.000000 0.540941 -0.218108 5.100000
3.056082 0.113165 -1.994223 0.554396 -0.118109 5.100000
2.889367 0.009165 -1.927053 0.559772 -0.018114 5.100000
2.729202 -0.091049 -1.851823 0.557474 0.081889 5.100000
2.574836 -0.186392 -1.776820 0.547819 0.181891 5.100000
2.425682 -0.275850 -1.701825 0.531570 0.281893 5.100000
2.281318 -0.358667 -1.626821 0.508783 0.381886 5.100000
2.141460 -0.434142 -1.551823 0.479741 0.481887 5.100000
2.005998 -0.501712 -1.476059 0.444267 0.589778 5.100000
1.874119 -0.561421 -1.411110 0.405678 0.593400 5.100000
1.746975 -0.613278 -1.335722 0.368922 0.593400 5.100000
1.625102 -0.657979 -1.260721 0.334178 0.593400 5.100000
1.508913 -0.696197 -1.185721 0.301437 0.593400 5.100000
1.398763 -0.728596 -1.110720 0.270700 0.593400 5.100000
1.294945 -0.755809 -1.035720 0.241978 0.593400 5.100000
1.197726 -0.778436 -0.960719 0.215262 0.593400 5.100000
1.107293 -0.797036 -0.885719 0.190551 0.593400 5.100000
1.023833 -0.812152 -0.810718 0.167849 0.593400 5.100000
0.947473 -0.824287 -0.735718 0.147148 0.593400 5.100000
0.878317 -0.833872 -0.660717 0.128462 0.593400 5.100000
0.816447 -0.841341 -0.585717 0.111778 0.593400 5.100000
0.761928 -0.847062 -0.510716 0.097111 0.593400 5.100000
0.714798 -0.851348 -0.435716 0.084438 0.593400 5.100000
0.675093 -0.854502 -0.360716 0.074578 0.505980 5.100000
0.642851 -0.856808 -0.285714 0.068256 0.405869 5.100000
0.618084 -0.858452 -0.210725 0.064567 0.305863 5.100000
0.600798 -0.859551 -0.135724 0.062738 0.205867 5.100000
0.590990 -0.860169 -0.060724 0.062104 0.105871 5.100000
0.588664 -0.860305 0.014277 0.062018 0.005865 5.100000
0.593837 -0.859985 0.089277 0.061907 -0.094133 5.100000
0.606507 -0.859210 0.164278 0.061145 -0.194130 5.100000
0.626656 -0.857995 0.239278 0.059129 -0.294138 5.100000
0.654286 -0.856404 0.314279 0.055155 -0.394134 5.100000
0.689412 -0.854584 0.389279 0.048477 -0.494130 5.100000
0.731962 -0.852728 0.445002 0.038212 -0.576952 5.100000
0.774464 -0.851345 0.387820 0.026841 -0.593400 5.100000
0.809483 -0.850572 0.312819 0.017467 -0.593400 5.100000
0.837014 -0.850192 0.237819 0.010089 -0.593400 5.100000
0.857060 -0.850043 0.162819 0.004724 -0.593400 5.100000
0.869609 -0.850001 0.087818 0.001372 -0.593400 5.100000
