# Supplementary material for: Automatic Parking Controller with a Twin Artificial Neural Network Architecture
Source: Hindawi journal article supplement (doi:10.1155/2019/4801985), 2019-01-01
Supplement: f1 [file 4801985.f1.zip › data/data_266.txt]

6.900000 1.100000 0.000000 0.000000 0.000000 5.100000
6.896309 1.100000 -0.075001 0.000030 -0.010187 5.100000
6.884988 1.100000 -0.150003 0.000202 -0.029946 5.100000
6.866264 1.099986 -0.225004 0.000632 -0.051429 5.100000
6.839987 1.099962 -0.300006 0.001474 -0.072697 5.100000
6.806255 1.099894 -0.374996 0.002830 -0.093693 5.100000
6.764993 1.099740 -0.449998 0.004832 -0.114358 5.100000
6.716256 1.099432 -0.524999 0.007595 -0.134593 5.100000
6.659997 1.098904 -0.600000 0.011243 -0.154315 5.100000
6.596262 1.098044 -0.675002 0.015869 -0.173422 5.100000
6.525015 1.096712 -0.750003 0.021600 -0.191825 5.100000
6.446301 1.094751 -0.825004 0.028513 -0.209424 5.100000
6.360086 1.091939 -0.900006 0.036706 -0.226121 5.100000
6.266423 1.088060 -0.974996 0.046237 -0.241844 5.100000
6.165305 1.082833 -1.049998 0.057178 -0.256513 5.100000
6.056780 1.075959 -1.124999 0.069586 -0.270099 5.100000
5.940864 1.067072 -1.200001 0.083502 -0.282603 5.100000
5.817629 1.055810 -1.275002 0.098946 -0.294063 5.100000
5.687140 1.041743 -1.350003 0.115956 -0.304590 5.100000
5.549480 1.024422 -1.425005 0.134546 -0.314365 5.100000
5.404750 1.003347 -1.500007 0.154765 -0.323665 5.100000
5.253109 0.978001 -1.574997 0.176644 -0.332873 5.100000
5.094716 0.947804 -1.649998 0.200285 -0.342492 5.100000
4.929786 0.912137 -1.725000 0.225803 -0.353205 5.100000
4.758566 0.870336 -1.800001 0.253404 -0.365895 5.100000
4.581394 0.821633 -1.875002 0.283415 -0.381791 5.100000
4.398656 0.765168 -1.953419 0.316391 -0.403629 5.100000
4.211304 0.700093 -1.988839 0.352665 -0.424402 5.100000
4.025041 0.627529 -2.000000 0.390606 -0.435679 5.100000
3.841635 0.547772 -2.000000 0.430156 -0.456282 5.100000
3.661592 0.460722 -2.000000 0.470383 -0.449963 5.100000
3.484997 0.366857 -2.000000 0.505156 -0.365219 5.100000
3.311319 0.267691 -2.000000 0.531221 -0.267336 5.100000
3.139841 0.164714 -2.000000 0.548823 -0.167333 5.100000
2.970556 0.059985 -1.966216 0.558048 -0.067331 5.100000
2.807274 -0.042273 -1.888735 0.559252 0.032670 5.100000
2.650129 -0.140132 -1.813735 0.553447 0.132672 5.100000
2.498479 -0.232614 -1.738743 0.540384 0.232675 5.100000
2.351796 -0.318774 -1.663741 0.520808 0.332665 5.100000
2.209745 -0.397951 -1.588740 0.494817 0.432667 5.100000
2.072120 -0.469473 -1.513676 0.462564 0.533309 5.100000
1.938495 -0.533051 -1.445644 0.424545 0.593400 5.100000
1.808925 -0.588690 -1.372637 0.386765 0.593400 5.100000
1.684403 -0.636831 -1.297636 0.351027 0.593400 5.100000
1.565365 -0.678153 -1.222636 0.317301 0.593400 5.100000
1.452200 -0.713341 -1.147635 0.285582 0.593400 5.100000
1.345238 -0.743024 -1.072635 0.255871 0.593400 5.100000
1.244742 -0.767835 -0.997635 0.228162 0.593400 5.100000
1.150944 -0.788352 -0.922634 0.202460 0.593400 5.100000
1.064034 -0.805116 -0.847634 0.178773 0.593400 5.100000
0.984164 -0.818658 -0.772633 0.157084 0.593400 5.100000
0.911446 -0.829445 -0.697633 0.137408 0.593400 5.100000
0.845988 -0.837906 -0.622632 0.119743 0.593400 5.100000
0.787835 -0.844444 -0.547632 0.104077 0.593400 5.100000
0.737068 -0.849395 -0.472631 0.090422 0.593400 5.100000
0.693698 -0.853069 -0.397631 0.078934 0.554792 5.100000
0.657784 -0.855763 -0.322630 0.070983 0.455084 5.100000
0.629342 -0.857713 -0.247637 0.066104 0.355088 5.100000
0.608371 -0.859076 -0.172639 0.063445 0.255086 5.100000
0.594882 -0.859923 -0.097639 0.062310 0.155088 5.100000
0.588997 -0.860288 -0.022638 0.062032 0.055087 5.100000
0.590324 -0.860206 0.052362 0.062004 -0.044909 5.100000
0.599334 -0.859643 0.127363 0.061645 -0.144917 5.100000
0.615802 -0.858637 0.202363 0.060322 -0.244914 5.100000
0.639747 -0.857226 0.277363 0.057398 -0.344912 5.100000
0.671185 -0.855498 0.352364 0.052154 -0.444910 5.100000
0.710173 -0.853626 0.432641 0.043747 -0.549265 5.100000
0.754444 -0.851932 0.429114 0.032194 -0.588141 5.100000
0.793183 -0.850894 0.349735 0.021831 -0.593400 5.100000
0.824404 -0.850341 0.274734 0.013471 -0.593400 5.100000
0.848123 -0.850099 0.199734 0.007116 -0.593400 5.100000
0.864366 -0.850012 0.124733 0.002773 -0.593400 5.100000
