# Supplementary material for: Automatic Parking Controller with a Twin Artificial Neural Network Architecture
Source: Hindawi journal article supplement (doi:10.1155/2019/4801985), 2019-01-01
Supplement: f1 [file 4801985.f1.zip › data/data_267.txt]

7.000000 1.100000 -0.000000 0.000000 0.000000 5.100000
6.996317 1.100000 -0.075003 0.000026 -0.008650 5.100000
6.984979 1.100000 -0.150005 0.000186 -0.025835 5.100000
6.966270 1.099987 -0.225001 0.000581 -0.045222 5.100000
6.939983 1.099964 -0.300000 0.001341 -0.064421 5.100000
6.906264 1.099903 -0.375003 0.002565 -0.083383 5.100000
6.864990 1.099764 -0.450003 0.004388 -0.102045 5.100000
6.816259 1.099488 -0.524999 0.006881 -0.120324 5.100000
6.759997 1.099010 -0.600000 0.010179 -0.138147 5.100000
6.696269 1.098230 -0.675003 0.014368 -0.155448 5.100000
6.625014 1.097025 -0.750001 0.019551 -0.172152 5.100000
6.546292 1.095246 -0.824998 0.025791 -0.188177 5.100000
6.460077 1.092709 -0.900000 0.033193 -0.203482 5.100000
6.366394 1.089201 -0.975003 0.041811 -0.217998 5.100000
6.265254 1.084470 -1.049999 0.051721 -0.231707 5.100000
6.156679 1.078249 -1.124997 0.062962 -0.244607 5.100000
6.040714 1.070208 -1.200001 0.075596 -0.256718 5.100000
5.917383 1.059996 -1.275001 0.089668 -0.268135 5.100000
5.786760 1.047243 -1.349998 0.105217 -0.278973 5.100000
5.648906 1.031502 -1.424997 0.122289 -0.289425 5.100000
5.503924 1.012325 -1.500001 0.140942 -0.299797 5.100000
5.351917 0.989186 -1.575000 0.161269 -0.310433 5.100000
5.193064 0.961564 -1.649996 0.183377 -0.321858 5.100000
5.027523 0.928810 -1.724998 0.207435 -0.334726 5.100000
4.855546 0.890284 -1.800001 0.233695 -0.349939 5.100000
4.677422 0.845186 -1.874998 0.262555 -0.369651 5.100000
4.493540 0.792644 -1.950071 0.294622 -0.394218 5.100000
4.304937 0.731779 -2.000000 0.330136 -0.417869 5.100000
4.116892 0.663374 -2.000000 0.368056 -0.438520 5.100000
3.931759 0.587739 -2.000000 0.408257 -0.464274 5.100000
3.749917 0.504505 -2.000000 0.450452 -0.472907 5.100000
3.571633 0.413903 -2.000000 0.488903 -0.405598 5.100000
3.396613 0.317135 -2.000000 0.519504 -0.317104 5.100000
3.224153 0.215863 -2.000000 0.541151 -0.216608 5.100000
3.053421 0.111508 -1.991337 0.554607 -0.116608 5.100000
2.886912 0.007640 -1.925701 0.559654 -0.016609 5.100000
2.726845 -0.092523 -1.850699 0.557357 0.083391 5.100000
2.572557 -0.187776 -1.775697 0.547645 0.183391 5.100000
2.423484 -0.277153 -1.700700 0.531264 0.283391 5.100000
2.279189 -0.359854 -1.625702 0.508403 0.383391 5.100000
2.139393 -0.435211 -1.550699 0.479247 0.483390 5.100000
2.003997 -0.502664 -1.474990 0.443693 0.590688 5.100000
1.872175 -0.562255 -1.409938 0.405112 0.593400 5.100000
1.745106 -0.614001 -1.334597 0.368386 0.593400 5.100000
1.623316 -0.658599 -1.259596 0.333672 0.593400 5.100000
1.507215 -0.696725 -1.184596 0.300961 0.593400 5.100000
1.397158 -0.729041 -1.109595 0.270254 0.593400 5.100000
1.293438 -0.756180 -1.034595 0.241563 0.593400 5.100000
1.196319 -0.778744 -0.959594 0.214877 0.593400 5.100000
1.105989 -0.797287 -0.884594 0.190196 0.593400 5.100000
1.022634 -0.812355 -0.809593 0.167523 0.593400 5.100000
0.946382 -0.824449 -0.734593 0.146853 0.593400 5.100000
0.877335 -0.833999 -0.659592 0.128197 0.593400 5.100000
0.815574 -0.841439 -0.584592 0.111543 0.593400 5.100000
0.761167 -0.847136 -0.509591 0.096906 0.593400 5.100000
0.714148 -0.851403 -0.434591 0.084267 0.593378 5.100000
0.674555 -0.854542 -0.359591 0.074460 0.504441 5.100000
0.642424 -0.856837 -0.284589 0.068184 0.404369 5.100000
0.617769 -0.858473 -0.209600 0.064527 0.304363 5.100000
0.600594 -0.859564 -0.134599 0.062721 0.204367 5.100000
0.590893 -0.860175 -0.059599 0.062100 0.104371 5.100000
0.588688 -0.860303 0.015402 0.062017 0.004365 5.100000
0.593968 -0.859976 0.090402 0.061902 -0.095633 5.100000
0.606750 -0.859195 0.165403 0.061126 -0.195630 5.100000
0.627015 -0.857974 0.240403 0.059086 -0.295638 5.100000
0.654758 -0.856378 0.315404 0.055077 -0.395634 5.100000
0.689997 -0.854555 0.390404 0.048352 -0.495630 5.100000
0.732649 -0.852701 0.444849 0.038028 -0.577268 5.100000
0.775046 -0.851330 0.386695 0.026685 -0.593400 5.100000
0.809951 -0.850564 0.311694 0.017341 -0.593400 5.100000
0.837369 -0.850189 0.236694 0.009994 -0.593400 5.100000
0.857301 -0.850041 0.161694 0.004660 -0.593400 5.100000
0.869738 -0.850000 0.086693 0.001338 -0.593400 5.100000
