# Supplementary material for: Automatic Parking Controller with a Twin Artificial Neural Network Architecture
Source: Hindawi journal article supplement (doi:10.1155/2019/4801985), 2019-01-01
Supplement: f1 [file 4801985.f1.zip › data/data_268.txt]

7.100000 1.100000 0.000000 0.000000 0.000000 5.100000
7.096326 1.100000 -0.075000 0.000025 -0.007231 5.100000
7.084977 1.100000 -0.150002 0.000162 -0.021884 5.100000
7.066275 1.099999 -0.224998 0.000527 -0.039255 5.100000
7.039986 1.099968 -0.300003 0.001215 -0.056480 5.100000
7.006259 1.099908 -0.375001 0.002322 -0.073503 5.100000
6.964996 1.099784 -0.449997 0.003952 -0.090268 5.100000
6.916262 1.099538 -0.525004 0.006214 -0.106701 5.100000
6.859999 1.099106 -0.600000 0.009180 -0.122768 5.100000
6.796253 1.098400 -0.674996 0.012950 -0.138385 5.100000
6.725021 1.097322 -0.750003 0.017598 -0.153527 5.100000
6.646276 1.095717 -0.824998 0.023224 -0.168119 5.100000
6.560067 1.093432 -0.899997 0.029883 -0.182145 5.100000
6.466362 1.090273 -0.975001 0.037653 -0.195577 5.100000
6.365212 1.086012 -1.049998 0.046599 -0.208401 5.100000
6.256602 1.080404 -1.125004 0.056764 -0.220657 5.100000
6.140578 1.073149 -1.199999 0.068221 -0.232390 5.100000
6.017171 1.063931 -1.275001 0.081013 -0.243697 5.100000
5.886431 1.052399 -1.350002 0.095200 -0.254726 5.100000
5.748417 1.038141 -1.424998 0.110844 -0.265669 5.100000
5.603209 1.020725 -1.500003 0.128034 -0.276815 5.100000
5.450916 0.999679 -1.575000 0.146869 -0.288537 5.100000
5.291649 0.974444 -1.649996 0.167486 -0.301310 5.100000
5.125586 0.944468 -1.725004 0.190090 -0.315772 5.100000
4.952936 0.909033 -1.799999 0.215037 -0.335361 5.100000
4.773984 0.867365 -1.874996 0.242973 -0.360256 5.100000
4.589063 0.818496 -1.953802 0.274250 -0.384976 5.100000
4.399090 0.761519 -1.988990 0.308972 -0.409696 5.100000
4.209815 0.697249 -2.000000 0.346328 -0.434417 5.100000
4.023065 0.625672 -2.000000 0.386129 -0.459136 5.100000
3.839420 0.546517 -2.000000 0.428434 -0.482345 5.100000
3.659338 0.459537 -2.000000 0.470571 -0.452170 5.100000
3.482762 0.365645 -2.000000 0.505532 -0.366806 5.100000
3.309132 0.266386 -2.000000 0.531538 -0.266010 5.100000
3.137684 0.163407 -1.999965 0.548938 -0.166012 5.100000
2.968386 0.058615 -1.966623 0.558294 -0.066012 5.100000
2.805159 -0.043599 -1.887747 0.559327 0.033988 5.100000
2.648097 -0.141393 -1.812751 0.553320 0.133994 5.100000
2.496505 -0.233797 -1.737745 0.540159 0.233988 5.100000
2.349887 -0.319862 -1.662748 0.520504 0.333994 5.100000
2.207902 -0.398949 -1.587752 0.494429 0.433987 5.100000
2.070332 -0.470361 -1.512627 0.462086 0.535208 5.100000
1.936753 -0.533838 -1.444887 0.424029 0.593400 5.100000
1.807247 -0.589373 -1.371647 0.386280 0.593400 5.100000
1.682795 -0.637419 -1.296646 0.350569 0.593400 5.100000
1.563832 -0.678656 -1.221646 0.316869 0.593400 5.100000
1.450747 -0.713767 -1.146645 0.285177 0.593400 5.100000
1.343869 -0.743382 -1.071645 0.255492 0.593400 5.100000
1.243460 -0.768132 -0.996645 0.227810 0.593400 5.100000
1.149752 -0.788596 -0.921644 0.202134 0.593400 5.100000
1.062933 -0.805315 -0.846644 0.178474 0.593400 5.100000
0.983157 -0.818818 -0.771643 0.156811 0.593400 5.100000
0.910534 -0.829571 -0.696643 0.137161 0.593400 5.100000
0.845172 -0.838004 -0.621642 0.119523 0.593400 5.100000
0.787116 -0.844519 -0.546642 0.103884 0.593400 5.100000
0.736448 -0.849451 -0.471641 0.090255 0.593400 5.100000
0.693177 -0.853110 -0.396641 0.078805 0.553569 5.100000
0.657360 -0.855793 -0.321640 0.070901 0.453764 5.100000
0.629016 -0.857734 -0.246647 0.066056 0.353768 5.100000
0.608143 -0.859090 -0.171649 0.063421 0.253767 5.100000
0.594751 -0.859932 -0.096649 0.062302 0.153768 5.100000
0.588971 -0.860289 -0.021648 0.062031 0.053766 5.100000
0.590391 -0.860202 0.053352 0.062003 -0.046229 5.100000
0.599499 -0.859633 0.128353 0.061636 -0.146237 5.100000
0.616068 -0.858621 0.203353 0.060296 -0.246234 5.100000
0.640113 -0.857205 0.278353 0.057345 -0.346232 5.100000
0.671650 -0.855473 0.353354 0.052066 -0.446230 5.100000
0.710740 -0.853601 0.433833 0.043610 -0.550752 5.100000
0.755005 -0.851914 0.428019 0.032044 -0.588485 5.100000
0.793644 -0.850884 0.348745 0.021707 -0.593400 5.100000
0.824765 -0.850336 0.273744 0.013374 -0.593400 5.100000
0.848384 -0.850097 0.198744 0.007047 -0.593400 5.100000
0.864528 -0.850011 0.123743 0.002730 -0.593400 5.100000
