# Supplementary material for: Automatic Parking Controller with a Twin Artificial Neural Network Architecture
Source: Hindawi journal article supplement (doi:10.1155/2019/4801985), 2019-01-01
Supplement: f1 [file 4801985.f1.zip › data/data_269.txt]

6.100000 1.200000 0.000000 0.000000 0.000000 5.100000
6.096257 1.200000 -0.074999 0.000055 -0.041087 5.100000
6.085027 1.199999 -0.149997 0.000405 -0.088463 5.100000
6.066241 1.199982 -0.224995 0.001343 -0.136218 5.100000
6.039998 1.199924 -0.300005 0.003160 -0.184719 5.100000
6.006257 1.199772 -0.375003 0.006170 -0.234309 5.100000
5.965000 1.199424 -0.450001 0.010723 -0.285501 5.100000
5.916256 1.198750 -0.525000 0.017188 -0.339175 5.100000
5.860020 1.197536 -0.599999 0.026043 -0.396991 5.100000
5.796299 1.195511 -0.674997 0.037872 -0.463404 5.100000
5.725127 1.192271 -0.749998 0.053621 -0.535585 5.100000
5.646535 1.187281 -0.825004 0.073402 -0.559133 5.100000
5.560600 1.179991 -0.900003 0.096089 -0.575893 5.100000
5.467403 1.169838 -0.975001 0.120997 -0.575934 5.100000
5.367064 1.156263 -1.050000 0.147886 -0.575953 5.100000
5.259753 1.138690 -1.124999 0.176757 -0.575878 5.100000
5.145646 1.116488 -1.199997 0.207615 -0.575731 5.100000
5.024994 1.088988 -1.275003 0.240477 -0.575746 5.100000
4.898093 1.055527 -1.350004 0.275327 -0.576106 5.100000
4.765289 1.015346 -1.425003 0.312175 -0.576543 5.100000
4.627015 0.967747 -1.500002 0.351084 -0.576155 5.100000
4.483732 0.912012 -1.575000 0.390134 -0.531482 5.100000
4.335740 0.847998 -1.649999 0.425020 -0.453463 5.100000
4.183128 0.776007 -1.724997 0.455651 -0.389630 5.100000
4.025961 0.696253 -1.800006 0.482739 -0.332589 5.100000
3.864274 0.608969 -1.875004 0.506424 -0.278028 5.100000
3.697992 0.514446 -1.951993 0.526607 -0.224322 5.100000
3.527387 0.413277 -1.990157 0.543021 -0.168187 5.100000
3.356871 0.308894 -2.000000 0.554815 -0.110185 5.100000
3.187298 0.202848 -2.000000 0.562095 -0.055557 5.100000
3.018334 0.095958 -1.985216 0.565255 -0.005621 5.100000
2.853540 -0.008455 -1.913604 0.563734 0.033229 5.100000
2.694729 -0.108339 -1.838606 0.558428 0.105093 5.100000
2.541508 -0.203013 -1.763608 0.547231 0.205329 5.100000
2.393366 -0.291593 -1.688598 0.529383 0.305330 5.100000
2.249904 -0.373326 -1.613600 0.505058 0.405334 5.100000
2.110878 -0.447553 -1.538601 0.474438 0.505326 5.100000
1.976113 -0.513758 -1.464499 0.437611 0.593400 5.100000
1.845338 -0.571892 -1.393622 0.399209 0.593400 5.100000
1.719465 -0.622331 -1.318622 0.362919 0.593400 5.100000
1.598942 -0.665751 -1.243621 0.328621 0.593400 5.100000
1.484177 -0.702828 -1.168620 0.296340 0.593400 5.100000
1.375505 -0.734213 -1.093618 0.266071 0.593400 5.100000
1.273236 -0.760541 -1.018624 0.237799 0.593400 5.100000
1.177589 -0.782396 -0.943625 0.211537 0.593400 5.100000
1.088781 -0.800340 -0.868625 0.187285 0.593400 5.100000
1.006951 -0.814915 -0.793625 0.165041 0.593400 5.100000
0.932249 -0.826580 -0.718625 0.144798 0.593400 5.100000
0.864762 -0.835793 -0.643624 0.126576 0.593400 5.100000
0.804571 -0.842956 -0.568623 0.110352 0.593400 5.100000
0.751750 -0.848428 -0.493621 0.096139 0.593400 5.100000
0.706326 -0.852530 -0.418620 0.083943 0.588061 5.100000
0.668333 -0.855547 -0.343619 0.074801 0.490302 5.100000
0.637794 -0.857742 -0.268619 0.069034 0.390295 5.100000
0.614724 -0.859300 -0.193619 0.065751 0.290299 5.100000
0.599135 -0.860312 -0.118619 0.064210 0.190300 5.100000
0.590980 -0.860836 -0.043620 0.063725 0.090295 5.100000
0.590395 -0.860871 0.031379 0.063686 -0.009701 5.100000
0.597295 -0.860425 0.106376 0.063506 -0.109697 5.100000
0.611671 -0.859519 0.181377 0.062558 -0.209703 5.100000
0.633529 -0.858174 0.256378 0.060226 -0.309701 5.100000
0.662866 -0.856467 0.331378 0.055801 -0.409698 5.100000
0.699704 -0.854540 0.406378 0.048520 -0.509704 5.100000
0.743739 -0.852640 0.450563 0.037564 -0.581072 5.100000
0.785878 -0.851292 0.383744 0.026278 -0.593400 5.100000
0.820492 -0.850541 0.308745 0.017010 -0.593400 5.100000
0.847606 -0.850176 0.233745 0.009750 -0.593400 5.100000
0.867233 -0.850038 0.158745 0.004503 -0.593400 5.100000
0.879381 -0.850000 0.083745 0.001248 -0.593400 5.100000
