# Supplementary material for: Automatic Parking Controller with a Twin Artificial Neural Network Architecture
Source: Hindawi journal article supplement (doi:10.1155/2019/4801985), 2019-01-01
Supplement: f1 [file 4801985.f1.zip › data/data_270.txt]

6.200000 1.200000 0.000000 0.000000 0.000000 5.100000
6.196269 1.200000 -0.074999 0.000053 -0.035891 5.100000
6.185023 1.199999 -0.150001 0.000375 -0.078967 5.100000
6.166235 1.199982 -0.224998 0.001231 -0.122129 5.100000
6.140008 1.199929 -0.300003 0.002882 -0.165609 5.100000
6.106250 1.199786 -0.374998 0.005596 -0.209508 5.100000
6.064995 1.199476 -0.449997 0.009686 -0.253987 5.100000
6.016262 1.198872 -0.525000 0.015437 -0.299263 5.100000
5.960015 1.197790 -0.599996 0.023201 -0.345649 5.100000
5.896293 1.195999 -0.675001 0.033337 -0.393765 5.100000
5.825106 1.193172 -0.749996 0.046312 -0.444797 5.100000
5.746460 1.188890 -0.825003 0.062698 -0.504054 5.100000
5.660448 1.182631 -0.899997 0.083005 -0.533762 5.100000
5.567117 1.173773 -0.975004 0.106463 -0.558485 5.100000
5.466596 1.161687 -1.049998 0.133085 -0.575640 5.100000
5.359028 1.145707 -1.125004 0.161967 -0.575727 5.100000
5.244609 1.125190 -1.200000 0.192833 -0.575734 5.100000
5.123564 1.099490 -1.274995 0.225681 -0.575611 5.100000
4.996174 1.067898 -1.350002 0.260530 -0.575448 5.100000
4.862799 1.029698 -1.424996 0.297438 -0.575782 5.100000
4.723815 0.984196 -1.500002 0.334756 -0.536994 5.100000
4.579526 0.931113 -1.574998 0.369305 -0.477941 5.100000
4.430125 0.870474 -1.650001 0.401171 -0.427955 5.100000
4.275789 0.802247 -1.724999 0.430617 -0.381601 5.100000
4.116666 0.726466 -1.799999 0.457673 -0.336978 5.100000
3.952864 0.643209 -1.875001 0.482232 -0.293208 5.100000
3.784443 0.552596 -1.950558 0.504186 -0.249794 5.100000
3.611842 0.455142 -2.000000 0.523161 -0.203862 5.100000
3.439324 0.353810 -2.000000 0.538314 -0.154590 5.100000
3.268234 0.250240 -2.000000 0.549643 -0.109376 5.100000
3.098109 0.145042 -1.999285 0.557444 -0.066759 5.100000
2.930124 0.039722 -1.949542 0.562074 -0.026639 5.100000
2.768405 -0.062154 -1.873740 0.561405 0.057811 5.100000
2.612634 -0.159365 -1.798745 0.553330 0.158481 5.100000
2.462163 -0.250904 -1.723738 0.538554 0.258483 5.100000
2.316556 -0.335930 -1.648744 0.517254 0.358483 5.100000
2.175472 -0.413756 -1.573737 0.489560 0.458477 5.100000
2.038757 -0.483740 -1.498400 0.455520 0.565210 5.100000
1.906029 -0.545657 -1.429107 0.416905 0.593400 5.100000
1.777803 -0.599621 -1.353755 0.379676 0.593400 5.100000
1.654711 -0.646241 -1.278754 0.344445 0.593400 5.100000
1.537204 -0.686201 -1.203755 0.311213 0.593400 5.100000
1.425637 -0.720175 -1.128755 0.280001 0.593400 5.100000
1.320338 -0.748801 -1.053762 0.250794 0.593400 5.100000
1.221557 -0.772675 -0.978760 0.223593 0.593400 5.100000
1.129528 -0.792387 -0.903759 0.198401 0.593400 5.100000
1.044409 -0.808472 -0.828758 0.175217 0.593400 5.100000
0.966355 -0.821440 -0.753758 0.154032 0.593400 5.100000
0.895471 -0.831759 -0.678758 0.134866 0.593400 5.100000
0.831859 -0.839828 -0.603758 0.117702 0.593400 5.100000
0.775577 -0.846057 -0.528759 0.102547 0.593400 5.100000
0.726679 -0.850758 -0.453760 0.089387 0.593400 5.100000
0.685205 -0.854250 -0.378761 0.078590 0.538112 5.100000
0.651173 -0.856803 -0.303761 0.071380 0.437148 5.100000
0.624610 -0.858643 -0.228761 0.067034 0.337151 5.100000
0.605504 -0.859894 -0.153761 0.064759 0.237144 5.100000
0.593883 -0.860651 -0.078760 0.063857 0.137149 5.100000
0.589986 -0.860896 -0.003758 0.063693 0.037148 5.100000
0.593140 -0.860697 0.071243 0.063650 -0.062850 5.100000
0.604007 -0.859999 0.146236 0.063142 -0.162851 5.100000
0.622345 -0.858856 0.221236 0.061537 -0.262847 5.100000
0.648187 -0.857311 0.296236 0.058181 -0.362854 5.100000
0.681509 -0.855462 0.371236 0.052340 -0.462851 5.100000
0.722413 -0.853499 0.451952 0.043142 -0.568770 5.100000
0.767072 -0.851834 0.420797 0.031305 -0.590701 5.100000
0.805211 -0.850831 0.343881 0.021101 -0.593400 5.100000
0.835835 -0.850313 0.268880 0.012905 -0.593400 5.100000
0.858971 -0.850086 0.193879 0.006708 -0.593400 5.100000
0.874613 -0.850009 0.118878 0.002526 -0.593400 5.100000
