# Supplementary material for: Automatic Parking Controller with a Twin Artificial Neural Network Architecture
Source: Hindawi journal article supplement (doi:10.1155/2019/4801985), 2019-01-01
Supplement: f1 [file 4801985.f1.zip › data/data_271.txt]

6.300000 1.200000 0.000000 0.000000 0.000000 5.100000
6.296272 1.200000 -0.075002 0.000046 -0.032342 5.100000
6.285027 1.199999 -0.150003 0.000351 -0.072558 5.100000
6.266234 1.199983 -0.224997 0.001152 -0.112710 5.100000
6.240008 1.199933 -0.299996 0.002692 -0.152989 5.100000
6.206248 1.199798 -0.374998 0.005226 -0.193405 5.100000
6.164998 1.199514 -0.450000 0.009022 -0.233991 5.100000
6.116260 1.198952 -0.525001 0.014319 -0.274768 5.100000
6.060008 1.197944 -0.600003 0.021446 -0.315766 5.100000
5.996291 1.196295 -0.675002 0.030665 -0.357024 5.100000
5.925082 1.193697 -0.749996 0.042323 -0.398600 5.100000
5.846435 1.189812 -0.824997 0.056754 -0.441143 5.100000
5.760370 1.184180 -0.899999 0.074332 -0.477155 5.100000
5.666948 1.176263 -0.975001 0.094952 -0.501794 5.100000
5.566286 1.165492 -1.050002 0.118527 -0.526521 5.100000
5.458475 1.151199 -1.125004 0.145322 -0.551235 5.100000
5.343718 1.132653 -1.199995 0.175520 -0.574028 5.100000
5.222250 1.109049 -1.274997 0.208338 -0.572436 5.100000
5.094336 1.079667 -1.349999 0.243246 -0.575065 5.100000
4.960294 1.043849 -1.425000 0.278487 -0.539316 5.100000
4.820405 1.001219 -1.500002 0.312455 -0.499298 5.100000
4.674912 0.951557 -1.575004 0.345034 -0.460746 5.100000
4.524049 0.894612 -1.649996 0.376137 -0.423071 5.100000
4.368050 0.830285 -1.724996 0.405659 -0.386028 5.100000
4.207115 0.758445 -1.799998 0.433460 -0.349440 5.100000
4.041399 0.679067 -1.875000 0.459426 -0.313198 5.100000
3.871017 0.592164 -1.951640 0.483394 -0.277262 5.100000
3.696453 0.498022 -1.990917 0.505096 -0.238347 5.100000
3.522392 0.399613 -2.000000 0.523431 -0.195698 5.100000
3.349950 0.298293 -2.000000 0.538440 -0.157128 5.100000
3.178900 0.194658 -2.000000 0.550466 -0.122236 5.100000
3.009101 0.089334 -1.984022 0.559386 -0.079225 5.100000
2.844274 -0.014378 -1.909380 0.562253 0.010739 5.100000
2.685775 -0.113935 -1.834288 0.558018 0.111080 5.100000
2.532851 -0.208281 -1.759286 0.546387 0.211082 5.100000
2.384994 -0.296488 -1.684290 0.528145 0.311085 5.100000
2.241791 -0.377799 -1.609293 0.503480 0.411076 5.100000
2.103013 -0.451585 -1.534291 0.472485 0.511078 5.100000
1.968471 -0.517323 -1.460773 0.435365 0.593400 5.100000
1.837964 -0.574994 -1.389309 0.397068 0.593400 5.100000
1.712388 -0.625009 -1.314309 0.360894 0.593400 5.100000
1.592184 -0.668048 -1.239309 0.326710 0.593400 5.100000
1.477760 -0.704782 -1.164308 0.294545 0.593400 5.100000
1.369448 -0.735860 -1.089307 0.264391 0.593400 5.100000
1.267553 -0.761913 -1.014311 0.236235 0.593400 5.100000
1.172296 -0.783530 -0.939312 0.210089 0.593400 5.100000
1.083885 -0.801264 -0.864312 0.185952 0.593400 5.100000
1.002464 -0.815659 -0.789313 0.163824 0.593400 5.100000
0.928173 -0.827172 -0.714313 0.143696 0.593400 5.100000
0.861104 -0.836256 -0.639312 0.125588 0.593400 5.100000
0.801331 -0.843314 -0.564311 0.109480 0.593400 5.100000
0.748933 -0.848698 -0.489310 0.095382 0.593400 5.100000
0.703938 -0.852730 -0.414308 0.083309 0.583785 5.100000
0.666375 -0.855693 -0.339307 0.074389 0.484552 5.100000
0.636272 -0.857848 -0.264306 0.068789 0.384545 5.100000
0.613632 -0.859371 -0.189306 0.065623 0.284548 5.100000
0.598468 -0.860356 -0.114306 0.064160 0.184550 5.100000
0.590727 -0.860852 -0.039307 0.063715 0.084544 5.100000
0.590618 -0.860857 0.035693 0.063686 -0.015452 5.100000
0.597926 -0.860384 0.110687 0.063478 -0.115447 5.100000
0.612723 -0.859453 0.185689 0.062468 -0.215452 5.100000
0.635008 -0.858086 0.260690 0.060037 -0.315451 5.100000
0.664776 -0.856360 0.335691 0.055471 -0.415448 5.100000
0.702050 -0.854427 0.410691 0.047996 -0.515455 5.100000
0.746383 -0.852541 0.448658 0.036848 -0.581609 5.100000
0.788074 -0.851234 0.379431 0.025690 -0.593400 5.100000
0.822257 -0.850512 0.304431 0.016538 -0.593400 5.100000
0.848940 -0.850164 0.229432 0.009393 -0.593400 5.100000
0.868128 -0.850033 0.154433 0.004263 -0.593400 5.100000
0.879827 -0.850000 0.079433 0.001129 -0.593400 5.100000
