# Supplementary material for: Automatic Parking Controller with a Twin Artificial Neural Network Architecture
Source: Hindawi journal article supplement (doi:10.1155/2019/4801985), 2019-01-01
Supplement: f1 [file 4801985.f1.zip › data/data_272.txt]

6.400000 1.200000 0.000000 0.000000 0.000000 5.100000
6.396278 1.200000 -0.074998 0.000044 -0.029702 5.100000
6.385024 1.200000 -0.149996 0.000338 -0.067862 5.100000
6.366239 1.199984 -0.224997 0.001100 -0.105855 5.100000
6.340011 1.199938 -0.300001 0.002556 -0.143876 5.100000
6.306243 1.199810 -0.375002 0.004960 -0.181914 5.100000
6.265002 1.199540 -0.449999 0.008539 -0.219931 5.100000
6.216255 1.199005 -0.524998 0.013545 -0.257890 5.100000
6.160010 1.198060 -0.600000 0.020230 -0.295725 5.100000
6.096283 1.196499 -0.675003 0.028858 -0.333324 5.100000
6.025069 1.194063 -0.750003 0.039707 -0.370504 5.100000
5.946411 1.190430 -0.825000 0.053036 -0.406409 5.100000
5.860313 1.185170 -0.900000 0.068980 -0.431393 5.100000
5.766862 1.177865 -0.975004 0.087436 -0.456100 5.100000
5.666090 1.167964 -1.050005 0.108630 -0.480821 5.100000
5.558133 1.154888 -1.125003 0.132763 -0.505541 5.100000
5.443132 1.137948 -1.200001 0.160087 -0.530296 5.100000
5.321276 1.116367 -1.275000 0.190568 -0.543541 5.100000
5.192833 1.089444 -1.349998 0.222661 -0.532838 5.100000
5.058023 1.056571 -1.424998 0.255291 -0.511615 5.100000
4.917153 1.017331 -1.500002 0.287773 -0.485141 5.100000
4.770452 0.971313 -1.575003 0.319705 -0.455981 5.100000
4.618201 0.918235 -1.650001 0.350795 -0.425615 5.100000
4.460630 0.857843 -1.724999 0.380822 -0.394789 5.100000
4.297986 0.789941 -1.800001 0.409635 -0.363911 5.100000
4.130489 0.714423 -1.875004 0.437075 -0.333204 5.100000
3.958295 0.631185 -1.950874 0.463024 -0.302995 5.100000
3.782049 0.540466 -2.000000 0.487178 -0.269907 5.100000
3.606289 0.444883 -2.000000 0.508404 -0.231328 5.100000
3.432508 0.345906 -2.000000 0.526599 -0.197542 5.100000
3.260419 0.244006 -2.000000 0.542168 -0.167272 5.100000
3.089712 0.139576 -1.995599 0.555214 -0.129003 5.100000
2.921982 0.034608 -1.945629 0.561890 -0.036663 5.100000
2.760585 -0.067077 -1.870036 0.561001 0.063422 5.100000
2.605080 -0.164026 -1.795033 0.552791 0.163420 5.100000
2.454861 -0.255268 -1.720032 0.537645 0.263415 5.100000
2.309479 -0.339946 -1.645034 0.516035 0.363422 5.100000
2.168618 -0.417391 -1.570035 0.488039 0.463416 5.100000
2.032118 -0.486986 -1.494602 0.453652 0.571854 5.100000
1.899580 -0.548505 -1.425445 0.415018 0.593400 5.100000
1.771599 -0.602090 -1.350050 0.377889 0.593400 5.100000
1.648774 -0.648365 -1.275049 0.342756 0.593400 5.100000
1.531550 -0.688015 -1.200049 0.309624 0.593400 5.100000
1.420285 -0.721710 -1.125050 0.278511 0.593400 5.100000
1.315303 -0.750088 -1.050057 0.249402 0.593400 5.100000
1.216850 -0.773743 -0.975056 0.222300 0.593400 5.100000
1.125159 -0.793263 -0.900054 0.197207 0.593400 5.100000
1.040386 -0.809183 -0.825053 0.174124 0.593400 5.100000
0.962687 -0.822007 -0.750053 0.153039 0.593400 5.100000
0.892158 -0.832206 -0.675053 0.133972 0.593400 5.100000
0.828904 -0.840176 -0.600053 0.116906 0.593400 5.100000
0.772987 -0.846323 -0.525054 0.101850 0.593400 5.100000
0.724454 -0.850958 -0.450054 0.088785 0.593400 5.100000
0.683347 -0.854396 -0.375055 0.078152 0.533197 5.100000
0.649686 -0.856909 -0.300056 0.071106 0.432208 5.100000
0.623498 -0.858718 -0.225056 0.066881 0.332212 5.100000
0.604762 -0.859942 -0.150056 0.064689 0.232204 5.100000
0.593504 -0.860675 -0.075055 0.063836 0.132208 5.100000
0.589958 -0.860897 -0.000054 0.063693 0.032209 5.100000
0.593513 -0.860672 0.074948 0.063639 -0.067789 5.100000
0.604742 -0.859953 0.149942 0.063092 -0.167792 5.100000
0.623445 -0.858788 0.224941 0.061419 -0.267787 5.100000
0.649653 -0.857226 0.299941 0.057959 -0.367794 5.100000
0.683347 -0.855367 0.374941 0.051975 -0.467791 5.100000
0.724612 -0.853405 0.454573 0.042590 -0.572587 5.100000
0.769138 -0.851770 0.416477 0.030753 -0.591709 5.100000
0.806903 -0.850795 0.340176 0.020648 -0.593400 5.100000
0.837158 -0.850295 0.265175 0.012551 -0.593400 5.100000
0.859921 -0.850080 0.190174 0.006455 -0.593400 5.100000
0.875184 -0.850008 0.115173 0.002373 -0.593400 5.100000
