# Supplementary material for: Automatic Parking Controller with a Twin Artificial Neural Network Architecture
Source: Hindawi journal article supplement (doi:10.1155/2019/4801985), 2019-01-01
Supplement: f1 [file 4801985.f1.zip › data/data_273.txt]

6.500000 1.200000 0.000000 0.000000 0.000000 5.100000
6.496280 1.200000 -0.075000 0.000042 -0.026962 5.100000
6.485017 1.200000 -0.149999 0.000316 -0.062988 5.100000
6.466245 1.199984 -0.225000 0.001038 -0.098762 5.100000
6.440015 1.199942 -0.299998 0.002421 -0.134487 5.100000
6.406243 1.199821 -0.375001 0.004693 -0.170101 5.100000
6.365012 1.199559 -0.449997 0.008048 -0.205558 5.100000
6.316245 1.199056 -0.525001 0.012757 -0.240767 5.100000
6.260018 1.198168 -0.600000 0.019002 -0.275606 5.100000
6.196271 1.196708 -0.675001 0.027053 -0.309885 5.100000
6.125066 1.194428 -0.750001 0.037111 -0.342866 5.100000
6.046387 1.191039 -0.825000 0.049348 -0.368933 5.100000
5.960276 1.186170 -0.900001 0.063754 -0.393648 5.100000
5.866777 1.179430 -0.975000 0.080499 -0.418372 5.100000
5.765928 1.170316 -1.050001 0.099799 -0.443088 5.100000
5.657856 1.158312 -1.124999 0.121852 -0.467893 5.100000
5.542648 1.142750 -1.200001 0.146837 -0.490309 5.100000
5.420500 1.122986 -1.274998 0.174240 -0.496385 5.100000
5.291574 1.098340 -1.350001 0.203375 -0.493833 5.100000
5.156136 1.068264 -1.424997 0.233623 -0.483228 5.100000
5.014403 1.032202 -1.500001 0.264426 -0.466619 5.100000
4.866653 0.989715 -1.575001 0.295348 -0.446109 5.100000
4.713131 0.940395 -1.650001 0.326022 -0.423222 5.100000
4.554124 0.883922 -1.725002 0.356189 -0.399053 5.100000
4.389879 0.820011 -1.800000 0.385665 -0.374362 5.100000
4.220644 0.748418 -1.875002 0.414294 -0.349673 5.100000
4.046665 0.668994 -1.951409 0.441973 -0.325475 5.100000
3.868578 0.581764 -1.993901 0.468430 -0.297827 5.100000
3.691253 0.489309 -2.000000 0.492318 -0.264450 5.100000
3.516034 0.392874 -2.000000 0.513570 -0.235591 5.100000
3.342804 0.292936 -2.000000 0.532620 -0.211441 5.100000
3.171381 0.189904 -2.000000 0.549035 -0.169278 5.100000
3.001692 0.084685 -1.981891 0.559818 -0.085462 5.100000
2.837114 -0.018894 -1.905959 0.562469 0.015522 5.100000
2.678870 -0.118249 -1.830958 0.557603 0.115520 5.100000
2.526183 -0.212325 -1.755960 0.545743 0.215518 5.100000
2.378539 -0.300259 -1.680958 0.527178 0.315515 5.100000
2.235541 -0.381230 -1.605961 0.502240 0.415524 5.100000
2.096947 -0.454677 -1.530957 0.470960 0.515522 5.100000
1.962579 -0.520058 -1.457935 0.433625 0.593400 5.100000
1.832281 -0.577373 -1.385979 0.395420 0.593400 5.100000
1.706934 -0.627062 -1.310979 0.359334 0.593400 5.100000
1.586980 -0.669806 -1.235979 0.325239 0.593400 5.100000
1.472819 -0.706277 -1.160979 0.293164 0.593400 5.100000
1.364785 -0.737120 -1.085977 0.263099 0.593400 5.100000
1.263179 -0.762963 -1.010980 0.235032 0.593400 5.100000
1.168223 -0.784396 -0.935981 0.208975 0.593400 5.100000
1.080120 -0.801971 -0.860982 0.184927 0.593400 5.100000
0.999014 -0.816227 -0.785982 0.162888 0.593400 5.100000
0.925044 -0.827623 -0.710983 0.142850 0.593400 5.100000
0.858296 -0.836609 -0.635982 0.124830 0.593400 5.100000
0.798847 -0.843587 -0.560981 0.108811 0.593400 5.100000
0.746776 -0.848903 -0.485980 0.094802 0.593400 5.100000
0.702110 -0.852882 -0.410979 0.082826 0.579906 5.100000
0.664879 -0.855805 -0.335978 0.074077 0.480112 5.100000
0.635110 -0.857928 -0.260977 0.068603 0.380106 5.100000
0.612809 -0.859425 -0.185976 0.065530 0.280108 5.100000
0.597976 -0.860388 -0.110976 0.064124 0.180111 5.100000
0.590562 -0.860863 -0.035976 0.063709 0.080104 5.100000
0.590807 -0.860846 0.039023 0.063685 -0.019892 5.100000
0.598432 -0.860352 0.114017 0.063454 -0.119888 5.100000
0.613555 -0.859401 0.189019 0.062395 -0.219891 5.100000
0.636170 -0.858017 0.264020 0.059885 -0.319891 5.100000
0.666267 -0.856278 0.339021 0.055209 -0.419887 5.100000
0.703878 -0.854339 0.414021 0.047584 -0.519895 5.100000
0.748407 -0.852467 0.447097 0.036300 -0.582059 5.100000
0.789753 -0.851191 0.376100 0.025241 -0.593400 5.100000
0.823604 -0.850491 0.301101 0.016178 -0.593400 5.100000
0.849955 -0.850155 0.226102 0.009121 -0.593400 5.100000
0.868808 -0.850030 0.151102 0.004081 -0.593400 5.100000
0.880161 -0.850000 0.076103 0.001039 -0.593400 5.100000
