# Supplementary material for: Automatic Parking Controller with a Twin Artificial Neural Network Architecture
Source: Hindawi journal article supplement (doi:10.1155/2019/4801985), 2019-01-01
Supplement: f1 [file 4801985.f1.zip › data/data_274.txt]

6.600000 1.200000 0.000000 0.000000 0.000000 5.100000
6.596290 1.200000 -0.074998 0.000040 -0.024118 5.100000
6.585013 1.200000 -0.149996 0.000305 -0.057953 5.100000
6.566246 1.199985 -0.224999 0.000986 -0.091449 5.100000
6.540010 1.199945 -0.300002 0.002280 -0.124825 5.100000
6.506249 1.199831 -0.375001 0.004410 -0.158011 5.100000
6.465008 1.199594 -0.449999 0.007555 -0.190917 5.100000
6.416246 1.199120 -0.525000 0.011940 -0.223434 5.100000
6.360017 1.198288 -0.600004 0.017769 -0.255431 5.100000
6.296269 1.196920 -0.675004 0.025238 -0.286297 5.100000
6.225060 1.194800 -0.749999 0.034487 -0.311611 5.100000
6.146367 1.191653 -0.825001 0.045593 -0.336326 5.100000
6.060242 1.187170 -0.899998 0.058703 -0.361049 5.100000
5.966691 1.180960 -0.974998 0.074025 -0.385760 5.100000
5.865795 1.172590 -1.050001 0.091742 -0.410513 5.100000
5.757606 1.161545 -1.125004 0.112059 -0.434884 5.100000
5.642237 1.147239 -1.200001 0.134803 -0.448569 5.100000
5.519828 1.129094 -1.275000 0.159627 -0.456184 5.100000
5.390547 1.106519 -1.350003 0.186219 -0.457547 5.100000
5.254564 1.078922 -1.424996 0.214187 -0.453350 5.100000
5.112131 1.045766 -1.499998 0.243131 -0.443997 5.100000
4.963476 1.006547 -1.575002 0.272676 -0.430796 5.100000
4.808851 0.960787 -1.650001 0.302488 -0.414906 5.100000
4.648556 0.908106 -1.724998 0.332323 -0.397380 5.100000
4.482827 0.848121 -1.800000 0.361991 -0.379055 5.100000
4.311978 0.780524 -1.875004 0.391335 -0.360625 5.100000
4.136262 0.704990 -1.950988 0.420304 -0.342898 5.100000
3.956472 0.621530 -2.000000 0.448609 -0.321844 5.100000
3.777380 0.532355 -2.000000 0.474826 -0.292871 5.100000
3.600628 0.438772 -2.000000 0.498787 -0.269029 5.100000
3.426082 0.341140 -2.000000 0.520909 -0.249425 5.100000
3.253654 0.239815 -2.000000 0.541083 -0.220130 5.100000
3.083023 0.135431 -2.000000 0.555631 -0.132124 5.100000
2.915384 0.030452 -1.943014 0.561970 -0.032573 5.100000
2.754233 -0.071064 -1.867030 0.560802 0.067433 5.100000
2.598955 -0.167801 -1.792027 0.552296 0.167428 5.100000
2.448938 -0.258788 -1.717024 0.536921 0.267434 5.100000
2.303745 -0.343201 -1.642026 0.515023 0.367430 5.100000
2.163054 -0.420334 -1.567028 0.486796 0.467426 5.100000
2.026735 -0.489607 -1.491541 0.452127 0.576877 5.100000
1.894354 -0.550803 -1.422435 0.413490 0.593400 5.100000
1.766571 -0.604081 -1.347043 0.376441 0.593400 5.100000
1.643964 -0.650077 -1.272042 0.341389 0.593400 5.100000
1.526973 -0.689475 -1.197042 0.308338 0.593400 5.100000
1.415952 -0.722945 -1.122042 0.277306 0.593400 5.100000
1.311228 -0.751124 -1.047050 0.248276 0.593400 5.100000
1.213041 -0.774603 -0.972049 0.221254 0.593400 5.100000
1.121625 -0.793967 -0.897048 0.196242 0.593400 5.100000
1.037133 -0.809754 -0.822046 0.173240 0.593400 5.100000
0.959721 -0.822463 -0.747045 0.152235 0.593400 5.100000
0.889483 -0.832565 -0.672045 0.133250 0.593400 5.100000
0.826520 -0.840455 -0.597045 0.116264 0.593400 5.100000
0.770898 -0.846536 -0.522046 0.101288 0.593400 5.100000
0.722661 -0.851118 -0.447046 0.088301 0.593400 5.100000
0.681852 -0.854513 -0.372047 0.077803 0.529130 5.100000
0.648491 -0.856994 -0.297048 0.070887 0.428197 5.100000
0.622606 -0.858778 -0.222048 0.066760 0.328202 5.100000
0.604177 -0.859980 -0.147048 0.064636 0.228195 5.100000
0.593217 -0.860693 -0.072048 0.063820 0.128198 5.100000
0.589939 -0.860898 0.002953 0.063692 0.028199 5.100000
0.593831 -0.860651 0.077955 0.063629 -0.071799 5.100000
0.605353 -0.859915 0.152950 0.063049 -0.171802 5.100000
0.624354 -0.858732 0.227949 0.061319 -0.271797 5.100000
0.650858 -0.857156 0.302948 0.057774 -0.371803 5.100000
0.684851 -0.855289 0.377948 0.051673 -0.471801 5.100000
0.726400 -0.853330 0.455955 0.042138 -0.574913 5.100000
0.770800 -0.851718 0.412988 0.030309 -0.592391 5.100000
0.808263 -0.850767 0.337170 0.020283 -0.593400 5.100000
0.838218 -0.850281 0.262168 0.012266 -0.593400 5.100000
0.860681 -0.850075 0.187167 0.006252 -0.593400 5.100000
0.875640 -0.850007 0.112166 0.002251 -0.593400 5.100000
