# Supplementary material for: Automatic Parking Controller with a Twin Artificial Neural Network Architecture
Source: Hindawi journal article supplement (doi:10.1155/2019/4801985), 2019-01-01
Supplement: f1 [file 4801985.f1.zip › data/data_275.txt]

6.700000 1.200000 0.000000 0.000000 0.000000 5.100000
6.696296 1.200000 -0.075002 0.000039 -0.021216 5.100000
6.685003 1.200000 -0.150004 0.000285 -0.052853 5.100000
6.666251 1.199985 -0.224996 0.000921 -0.084070 5.100000
6.640006 1.199948 -0.299998 0.002139 -0.115115 5.100000
6.606249 1.199841 -0.375000 0.004121 -0.145899 5.100000
6.565005 1.199618 -0.450002 0.007063 -0.176325 5.100000
6.516250 1.199171 -0.525005 0.011139 -0.206392 5.100000
6.460010 1.198400 -0.599996 0.016541 -0.234381 5.100000
6.396273 1.197131 -0.674999 0.023387 -0.259055 5.100000
6.325051 1.195170 -0.750001 0.031790 -0.283779 5.100000
6.246353 1.192273 -0.825003 0.041928 -0.308499 5.100000
6.160204 1.188152 -0.900004 0.053970 -0.333216 5.100000
6.066621 1.182444 -0.974997 0.068108 -0.357963 5.100000
5.965669 1.174735 -1.049999 0.084495 -0.381754 5.100000
5.857400 1.164560 -1.125001 0.103092 -0.398353 5.100000
5.741894 1.151418 -1.200003 0.123745 -0.411191 5.100000
5.619271 1.134753 -1.275006 0.146359 -0.419838 5.100000
5.489677 1.114051 -1.349997 0.170707 -0.423886 5.100000
5.353252 1.088707 -1.424999 0.196555 -0.423699 5.100000
5.210234 1.058215 -1.500002 0.223615 -0.419596 5.100000
5.060797 1.022010 -1.575004 0.251603 -0.412167 5.100000
4.905231 0.979638 -1.650006 0.280276 -0.402350 5.100000
4.743769 0.930577 -1.725000 0.309411 -0.390934 5.100000
4.576708 0.874445 -1.800000 0.338857 -0.378753 5.100000
4.404343 0.810778 -1.875002 0.368507 -0.366525 5.100000
4.226972 0.739223 -1.951713 0.398345 -0.355095 5.100000
4.045385 0.659566 -1.993757 0.428120 -0.339845 5.100000
3.864643 0.573966 -2.000000 0.456272 -0.316789 5.100000
3.686296 0.483455 -2.000000 0.482603 -0.298183 5.100000
3.510323 0.388429 -2.000000 0.507550 -0.284219 5.100000
3.336708 0.289139 -2.000000 0.531014 -0.259684 5.100000
3.165248 0.186164 -2.000000 0.549527 -0.182114 5.100000
2.995581 0.080850 -1.976543 0.560078 -0.080889 5.100000
2.831330 -0.022532 -1.903269 0.562312 0.019111 5.100000
2.673292 -0.121725 -1.828267 0.557265 0.119107 5.100000
2.520805 -0.215598 -1.753265 0.545195 0.219110 5.100000
2.373329 -0.303284 -1.678263 0.526391 0.319112 5.100000
2.230487 -0.384006 -1.603272 0.501226 0.419112 5.100000
2.092058 -0.457164 -1.528269 0.469715 0.519108 5.100000
1.957820 -0.522258 -1.455653 0.432215 0.593400 5.100000
1.827693 -0.579286 -1.383286 0.394090 0.593400 5.100000
1.702532 -0.628712 -1.308286 0.358076 0.593400 5.100000
1.582780 -0.671218 -1.233287 0.324053 0.593400 5.100000
1.468834 -0.707478 -1.158286 0.292050 0.593400 5.100000
1.361024 -0.738131 -1.083285 0.262056 0.593400 5.100000
1.259653 -0.763806 -1.008287 0.234062 0.593400 5.100000
1.164940 -0.785091 -0.933288 0.208077 0.593400 5.100000
1.077086 -0.802537 -0.858289 0.184102 0.593400 5.100000
0.996235 -0.816682 -0.783290 0.162134 0.593400 5.100000
0.922523 -0.827985 -0.708290 0.142168 0.593400 5.100000
0.856036 -0.836891 -0.633290 0.124221 0.593400 5.100000
0.796849 -0.843805 -0.558289 0.108273 0.593400 5.100000
0.745042 -0.849067 -0.483288 0.094336 0.593400 5.100000
0.700642 -0.853004 -0.408287 0.082440 0.576496 5.100000
0.663678 -0.855894 -0.333286 0.073829 0.476521 5.100000
0.634180 -0.857992 -0.258285 0.068456 0.376516 5.100000
0.612151 -0.859467 -0.183284 0.065456 0.276518 5.100000
0.597593 -0.860413 -0.108283 0.064097 0.176521 5.100000
0.590451 -0.860870 -0.033283 0.063706 0.076514 5.100000
0.590968 -0.860836 0.041716 0.063684 -0.023482 5.100000
0.598852 -0.860326 0.116709 0.063434 -0.123478 5.100000
0.614239 -0.859359 0.191711 0.062333 -0.223481 5.100000
0.637121 -0.857960 0.266712 0.059759 -0.323482 5.100000
0.667485 -0.856211 0.341713 0.054992 -0.423477 5.100000
0.705364 -0.854269 0.416718 0.047247 -0.523489 5.100000
0.750028 -0.852408 0.445795 0.035862 -0.582462 5.100000
0.791099 -0.851157 0.373407 0.024881 -0.593400 5.100000
0.824681 -0.850474 0.298408 0.015890 -0.593400 5.100000
0.850765 -0.850148 0.223409 0.008904 -0.593400 5.100000
0.869349 -0.850028 0.148409 0.003937 -0.593400 5.100000
