# Supplementary material for: Automatic Parking Controller with a Twin Artificial Neural Network Architecture
Source: Hindawi journal article supplement (doi:10.1155/2019/4801985), 2019-01-01
Supplement: f1 [file 4801985.f1.zip › data/data_276.txt]

6.800000 1.200000 0.000000 0.000000 0.000000 5.100000
6.796303 1.200000 -0.075002 0.000038 -0.018413 5.100000
6.784997 1.200000 -0.150004 0.000266 -0.047729 5.100000
6.766261 1.199986 -0.225001 0.000860 -0.076678 5.100000
6.739992 1.199951 -0.299999 0.001997 -0.105418 5.100000
6.706254 1.199850 -0.375001 0.003840 -0.133887 5.100000
6.665000 1.199640 -0.450003 0.006570 -0.161495 5.100000
6.616257 1.199234 -0.524999 0.010321 -0.186438 5.100000
6.560002 1.198512 -0.599997 0.015236 -0.211152 5.100000
6.496268 1.197352 -0.675000 0.021458 -0.235877 5.100000
6.425036 1.195555 -0.750001 0.029163 -0.260590 5.100000
6.346339 1.192896 -0.824998 0.038511 -0.285310 5.100000
6.260168 1.189098 -0.899996 0.049678 -0.309995 5.100000
6.166570 1.183845 -0.974998 0.062756 -0.331273 5.100000
6.065561 1.176746 -1.049999 0.077760 -0.349327 5.100000
5.957228 1.167390 -1.125003 0.094685 -0.364782 5.100000
5.841600 1.155321 -1.200004 0.113511 -0.377276 5.100000
5.718808 1.140045 -1.275000 0.134159 -0.386519 5.100000
5.588937 1.121040 -1.349999 0.156507 -0.392451 5.100000
5.452156 1.097785 -1.425002 0.180389 -0.394995 5.100000
5.308624 1.069734 -1.500002 0.205615 -0.394683 5.100000
5.158546 1.036366 -1.574998 0.231990 -0.391838 5.100000
5.002141 0.997136 -1.649997 0.259355 -0.387013 5.100000
4.839665 0.951576 -1.725000 0.287541 -0.380959 5.100000
4.671400 0.899143 -1.800001 0.316457 -0.374367 5.100000
4.497654 0.839389 -1.874997 0.346051 -0.367993 5.100000
4.318742 0.771784 -1.950859 0.376348 -0.362867 5.100000
4.135553 0.696106 -2.000000 0.407153 -0.354612 5.100000
3.953046 0.614123 -2.000000 0.436888 -0.336221 5.100000
3.773067 0.526932 -2.000000 0.465248 -0.322964 5.100000
3.595582 0.434748 -2.000000 0.492643 -0.313911 5.100000
3.420658 0.337809 -2.000000 0.519302 -0.305600 5.100000
3.248201 0.236515 -2.000000 0.541535 -0.226432 5.100000
3.077641 0.132098 -1.998212 0.555906 -0.129423 5.100000
2.910222 0.027186 -1.940693 0.562225 -0.029417 5.100000
2.749256 -0.074178 -1.864664 0.560780 0.070576 5.100000
2.594149 -0.170768 -1.789665 0.551893 0.170581 5.100000
2.444294 -0.261550 -1.714668 0.536346 0.270584 5.100000
2.299244 -0.345745 -1.639668 0.514223 0.370580 5.100000
2.158694 -0.422638 -1.564665 0.485809 0.470583 5.100000
2.022515 -0.491653 -1.489155 0.450926 0.580509 5.100000
1.890253 -0.552599 -1.420053 0.412292 0.593400 5.100000
1.762628 -0.605637 -1.344681 0.375306 0.593400 5.100000
1.640191 -0.651414 -1.269680 0.340317 0.593400 5.100000
1.523384 -0.690616 -1.194679 0.307330 0.593400 5.100000
1.412555 -0.723910 -1.119679 0.276361 0.593400 5.100000
1.308034 -0.751933 -1.044688 0.247393 0.593400 5.100000
1.210056 -0.775273 -0.969687 0.220435 0.593400 5.100000
1.118856 -0.794516 -0.894685 0.195486 0.593400 5.100000
1.034586 -0.810200 -0.819684 0.172548 0.593400 5.100000
0.957399 -0.822819 -0.744683 0.151606 0.593400 5.100000
0.887390 -0.832845 -0.669683 0.132685 0.593400 5.100000
0.824657 -0.840673 -0.594682 0.115762 0.593400 5.100000
0.769266 -0.846701 -0.519683 0.100848 0.593400 5.100000
0.721261 -0.851242 -0.444683 0.087924 0.593400 5.100000
0.680686 -0.854604 -0.369684 0.077533 0.525897 5.100000
0.647560 -0.857060 -0.294685 0.070718 0.425047 5.100000
0.621912 -0.858824 -0.219685 0.066666 0.325051 5.100000
0.603725 -0.860010 -0.144686 0.064596 0.225045 5.100000
0.593005 -0.860707 -0.069686 0.063810 0.125048 5.100000
0.589928 -0.860899 0.005315 0.063692 0.025050 5.100000
0.594088 -0.860634 0.080317 0.063621 -0.074948 5.100000
0.605842 -0.859884 0.155313 0.063014 -0.174952 5.100000
0.625077 -0.858688 0.230312 0.061238 -0.274948 5.100000
0.651814 -0.857100 0.305311 0.057625 -0.374953 5.100000
0.686041 -0.855228 0.380311 0.051432 -0.474951 5.100000
0.727805 -0.853271 0.456501 0.041782 -0.576181 5.100000
0.772097 -0.851679 0.410295 0.029963 -0.592822 5.100000
0.809323 -0.850745 0.334807 0.019999 -0.593400 5.100000
0.839042 -0.850270 0.259806 0.012045 -0.593400 5.100000
0.861269 -0.850071 0.184805 0.006095 -0.593400 5.100000
0.875992 -0.850006 0.109804 0.002157 -0.593400 5.100000
