# Supplementary material for: Automatic Parking Controller with a Twin Artificial Neural Network Architecture
Source: Hindawi journal article supplement (doi:10.1155/2019/4801985), 2019-01-01
Supplement: f1 [file 4801985.f1.zip › data/data_277.txt]

6.900000 1.200000 0.000000 0.000000 0.000000 5.100000
6.896309 1.200000 -0.075000 0.000033 -0.015757 5.100000
6.884988 1.200000 -0.150000 0.000248 -0.042721 5.100000
6.866261 1.199986 -0.225000 0.000803 -0.069446 5.100000
6.839992 1.199954 -0.300001 0.001854 -0.094727 5.100000
6.806260 1.199862 -0.374999 0.003540 -0.119437 5.100000
6.764988 1.199670 -0.450001 0.006014 -0.144160 5.100000
6.716264 1.199299 -0.524999 0.009425 -0.168877 5.100000
6.659995 1.198642 -0.600002 0.013937 -0.193598 5.100000
6.596270 1.197572 -0.674999 0.019697 -0.218339 5.100000
6.525028 1.195920 -0.750002 0.026865 -0.242361 5.100000
6.446329 1.193473 -0.824999 0.035544 -0.264101 5.100000
6.360139 1.189971 -0.900003 0.045823 -0.284367 5.100000
6.266527 1.185128 -0.974999 0.057781 -0.302950 5.100000
6.165482 1.178589 -1.050003 0.071465 -0.319624 5.100000
6.057079 1.170002 -1.124999 0.086909 -0.334115 5.100000
5.941351 1.158924 -1.200004 0.104110 -0.346252 5.100000
5.818404 1.144907 -1.274999 0.123010 -0.355876 5.100000
5.688317 1.127473 -1.350004 0.143539 -0.362973 5.100000
5.551221 1.106123 -1.424999 0.165597 -0.367610 5.100000
5.407265 1.080325 -1.500005 0.189076 -0.370045 5.100000
5.256624 1.049561 -1.574999 0.213849 -0.370579 5.100000
5.099519 1.013305 -1.650005 0.239805 -0.369787 5.100000
4.936148 0.971011 -1.725000 0.266862 -0.368166 5.100000
4.766825 0.922150 -1.799998 0.294985 -0.366418 5.100000
4.591806 0.866170 -1.875000 0.324188 -0.365244 5.100000
4.411449 0.802510 -1.952643 0.354573 -0.365698 5.100000
4.226577 0.730728 -1.990342 0.386016 -0.362763 5.100000
4.042530 0.652592 -2.000000 0.416867 -0.350775 5.100000
3.860897 0.568864 -2.000000 0.446830 -0.342894 5.100000
3.681834 0.479806 -2.000000 0.476357 -0.339873 5.100000
3.505476 0.385495 -2.000000 0.505707 -0.334889 5.100000
3.331824 0.286282 -2.000000 0.531462 -0.268741 5.100000
3.160425 0.183189 -2.000000 0.549985 -0.178592 5.100000
2.990849 0.077901 -1.978137 0.560114 -0.078064 5.100000
2.826777 -0.025413 -1.901148 0.562095 0.021940 5.100000
2.668903 -0.124451 -1.826142 0.557061 0.121943 5.100000
2.516559 -0.218175 -1.751148 0.544735 0.221937 5.100000
2.369223 -0.305665 -1.676142 0.525776 0.321941 5.100000
2.226507 -0.386189 -1.601147 0.500421 0.421939 5.100000
2.088201 -0.459116 -1.526142 0.468735 0.521938 5.100000
1.954073 -0.523984 -1.453856 0.431102 0.593400 5.100000
1.824080 -0.580787 -1.381163 0.393043 0.593400 5.100000
1.699066 -0.630007 -1.306164 0.357086 0.593400 5.100000
1.579475 -0.672326 -1.231164 0.323119 0.593400 5.100000
1.465698 -0.708419 -1.156164 0.291173 0.593400 5.100000
1.358066 -0.738923 -1.081163 0.261237 0.593400 5.100000
1.256879 -0.764466 -1.006165 0.233299 0.593400 5.100000
1.162358 -0.785636 -0.931165 0.207371 0.593400 5.100000
1.074700 -0.802981 -0.856166 0.183453 0.593400 5.100000
0.994050 -0.817038 -0.781167 0.161541 0.593400 5.100000
0.920542 -0.828268 -0.706167 0.141633 0.593400 5.100000
0.854263 -0.837112 -0.631167 0.123742 0.593400 5.100000
0.795282 -0.843975 -0.556167 0.107851 0.593400 5.100000
0.743682 -0.849195 -0.481166 0.093971 0.593400 5.100000
0.699492 -0.853099 -0.406165 0.082139 0.573682 5.100000
0.662739 -0.855963 -0.331164 0.073636 0.473691 5.100000
0.633453 -0.858042 -0.256162 0.068342 0.373687 5.100000
0.611637 -0.859500 -0.181161 0.065399 0.273687 5.100000
0.597300 -0.860432 -0.106161 0.064077 0.173691 5.100000
0.590379 -0.860874 -0.031161 0.063703 0.073684 5.100000
0.591098 -0.860828 0.043839 0.063684 -0.026313 5.100000
0.599190 -0.860304 0.118831 0.063417 -0.126308 5.100000
0.614786 -0.859324 0.193833 0.062283 -0.226310 5.100000
0.637879 -0.857915 0.268834 0.059657 -0.326312 5.100000
0.668453 -0.856158 0.343835 0.054818 -0.426308 5.100000
0.706545 -0.854214 0.418987 0.046976 -0.526470 5.100000
0.751295 -0.852363 0.444751 0.035521 -0.582813 5.100000
0.792153 -0.851131 0.371284 0.024599 -0.593400 5.100000
0.825524 -0.850461 0.296285 0.015665 -0.593400 5.100000
0.851397 -0.850142 0.221286 0.008735 -0.593400 5.100000
0.869769 -0.850026 0.146286 0.003824 -0.593400 5.100000
