# Supplementary material for: Automatic Parking Controller with a Twin Artificial Neural Network Architecture
Source: Hindawi journal article supplement (doi:10.1155/2019/4801985), 2019-01-01
Supplement: f1 [file 4801985.f1.zip › data/data_278.txt]

7.000000 1.200000 0.000000 0.000000 0.000000 5.100000
6.996319 1.200000 -0.074996 0.000032 -0.012807 5.100000
6.984986 1.200000 -0.150003 0.000231 -0.036034 5.100000
6.966268 1.199987 -0.225001 0.000724 -0.060676 5.100000
6.939986 1.199957 -0.299998 0.001689 -0.085225 5.100000
6.906260 1.199878 -0.374997 0.003243 -0.109503 5.100000
6.864995 1.199696 -0.450002 0.005547 -0.133303 5.100000
6.816260 1.199352 -0.524998 0.008728 -0.156594 5.100000
6.760002 1.198748 -0.599995 0.012928 -0.179239 5.100000
6.696271 1.197762 -0.675003 0.018260 -0.201106 5.100000
6.625029 1.196222 -0.749999 0.024866 -0.222042 5.100000
6.546310 1.193955 -0.824996 0.032831 -0.241867 5.100000
6.460125 1.190728 -0.900004 0.042249 -0.260420 5.100000
6.366481 1.186265 -0.975000 0.053205 -0.277513 5.100000
6.265413 1.180252 -1.049996 0.065740 -0.292970 5.100000
6.156950 1.172344 -1.125002 0.079887 -0.306638 5.100000
6.041149 1.162169 -1.200000 0.095646 -0.318378 5.100000
5.918071 1.149287 -1.274997 0.113002 -0.328169 5.100000
5.787809 1.133270 -1.349996 0.131924 -0.335979 5.100000
5.650453 1.113613 -1.425002 0.152336 -0.341953 5.100000
5.506156 1.089859 -1.499998 0.174179 -0.346282 5.100000
5.355051 1.061454 -1.574994 0.197399 -0.349288 5.100000
5.197337 1.027908 -1.650002 0.221918 -0.351408 5.100000
5.033219 0.988645 -1.724999 0.247725 -0.353159 5.100000
4.862958 0.943129 -1.799996 0.274836 -0.355158 5.100000
4.686835 0.890759 -1.874996 0.303311 -0.358162 5.100000
4.505192 0.830914 -1.950478 0.333315 -0.363276 5.100000
4.318955 0.763140 -2.000000 0.364795 -0.366026 5.100000
4.133185 0.688819 -2.000000 0.396198 -0.358330 5.100000
3.949900 0.608797 -2.000000 0.427154 -0.355584 5.100000
3.769177 0.523145 -2.000000 0.458085 -0.357240 5.100000
3.591210 0.431918 -2.000000 0.489435 -0.363106 5.100000
3.416163 0.335192 -2.000000 0.519379 -0.325043 5.100000
3.243746 0.233850 -2.000000 0.541991 -0.226766 5.100000
3.073078 0.129255 -1.996112 0.556243 -0.126765 5.100000
2.905865 0.024442 -1.937708 0.562295 -0.026764 5.100000
2.745073 -0.076809 -1.862677 0.560667 0.073226 5.100000
2.590117 -0.173248 -1.787674 0.551553 0.173227 5.100000
2.440389 -0.263866 -1.712678 0.535841 0.273228 5.100000
2.295466 -0.347888 -1.637681 0.513547 0.373228 5.100000
2.155030 -0.424566 -1.562673 0.484972 0.473229 5.100000
2.018963 -0.493371 -1.487157 0.449914 0.583291 5.100000
1.886807 -0.554104 -1.418038 0.411285 0.593400 5.100000
1.759314 -0.606941 -1.342693 0.374353 0.593400 5.100000
1.637022 -0.652535 -1.267692 0.339417 0.593400 5.100000
1.520369 -0.691571 -1.192692 0.306484 0.593400 5.100000
1.409703 -0.724717 -1.117691 0.275568 0.593400 5.100000
1.305352 -0.752609 -1.042701 0.246653 0.593400 5.100000
1.207550 -0.775834 -0.967700 0.219748 0.593400 5.100000
1.116533 -0.794976 -0.892698 0.194852 0.593400 5.100000
1.032448 -0.810572 -0.817697 0.171967 0.593400 5.100000
0.955451 -0.823116 -0.742696 0.151079 0.593400 5.100000
0.885634 -0.833079 -0.667695 0.132211 0.593400 5.100000
0.823095 -0.840854 -0.592695 0.115341 0.593400 5.100000
0.767899 -0.846839 -0.517695 0.100481 0.593400 5.100000
0.720089 -0.851345 -0.442695 0.087608 0.593400 5.100000
0.679710 -0.854679 -0.367696 0.077309 0.523159 5.100000
0.646782 -0.857115 -0.292697 0.070578 0.422397 5.100000
0.621332 -0.858863 -0.217698 0.066589 0.322401 5.100000
0.603348 -0.860034 -0.142698 0.064562 0.222395 5.100000
0.592837 -0.860718 -0.067698 0.063802 0.122398 5.100000
0.589920 -0.860899 0.007302 0.063691 0.022400 5.100000
0.594308 -0.860619 0.082304 0.063614 -0.077598 5.100000
0.606259 -0.859858 0.157301 0.062983 -0.177603 5.100000
0.625691 -0.858650 0.232300 0.061168 -0.277598 5.100000
0.652624 -0.857053 0.307299 0.057497 -0.377603 5.100000
0.687050 -0.855176 0.382299 0.051225 -0.477602 5.100000
0.728988 -0.853222 0.456574 0.041481 -0.576850 5.100000
0.773180 -0.851647 0.408081 0.029673 -0.593100 5.100000
0.810208 -0.850727 0.332820 0.019762 -0.593400 5.100000
0.839730 -0.850261 0.257819 0.011861 -0.593400 5.100000
0.861759 -0.850068 0.182818 0.005964 -0.593400 5.100000
0.876284 -0.850005 0.107817 0.002078 -0.593400 5.100000
