# Supplementary material for: Automatic Parking Controller with a Twin Artificial Neural Network Architecture
Source: Hindawi journal article supplement (doi:10.1155/2019/4801985), 2019-01-01
Supplement: f1 [file 4801985.f1.zip › data/data_279.txt]

7.100000 1.200000 0.000000 0.000000 -0.000000 5.100000
7.096328 1.200000 -0.074998 0.000031 -0.010948 5.100000
7.084974 1.200000 -0.149997 0.000215 -0.032022 5.100000
7.066272 1.199987 -0.225002 0.000671 -0.054810 5.100000
7.039990 1.199959 -0.300004 0.001560 -0.077320 5.100000
7.006262 1.199886 -0.374999 0.002990 -0.099540 5.100000
6.964993 1.199723 -0.450000 0.005108 -0.121359 5.100000
6.916255 1.199399 -0.524998 0.008041 -0.142693 5.100000
6.860004 1.198845 -0.600002 0.011892 -0.163415 5.100000
6.796258 1.197937 -0.674995 0.016789 -0.183422 5.100000
6.725026 1.196528 -0.749999 0.022844 -0.202568 5.100000
6.646303 1.194447 -0.825001 0.030137 -0.220734 5.100000
6.560109 1.191486 -0.899999 0.038758 -0.237782 5.100000
6.466437 1.187387 -0.975001 0.048779 -0.253572 5.100000
6.365352 1.181880 -1.049995 0.060237 -0.267986 5.100000
6.256834 1.174634 -1.124998 0.073192 -0.280945 5.100000
6.140965 1.165309 -1.200002 0.087638 -0.292365 5.100000
6.017782 1.153497 -1.274995 0.103590 -0.302236 5.100000
5.887355 1.138795 -1.349999 0.121023 -0.310625 5.100000
5.749790 1.120762 -1.424997 0.139911 -0.317641 5.100000
5.605183 1.098895 -1.499997 0.160232 -0.323490 5.100000
5.453683 1.072734 -1.575002 0.181963 -0.328479 5.100000
5.295439 1.041728 -1.649995 0.205084 -0.332998 5.100000
5.130665 1.005350 -1.725000 0.229629 -0.337552 5.100000
4.959582 0.963013 -1.799999 0.255653 -0.342721 5.100000
4.782462 0.914108 -1.874997 0.283287 -0.349288 5.100000
4.599611 0.857969 -1.953702 0.312758 -0.358865 5.100000
4.411887 0.794012 -1.988313 0.344079 -0.365016 5.100000
4.224782 0.723615 -2.000000 0.375703 -0.363040 5.100000
4.039913 0.647303 -2.000000 0.407324 -0.364545 5.100000
3.857581 0.565158 -2.000000 0.439396 -0.371288 5.100000
3.678000 0.477127 -2.000000 0.472505 -0.385587 5.100000
3.501443 0.383185 -2.000000 0.505160 -0.362097 5.100000
3.327824 0.283928 -2.000000 0.532041 -0.276842 5.100000
3.156480 0.180776 -2.000000 0.550296 -0.175738 5.100000
2.987028 0.075498 -1.974541 0.560348 -0.075742 5.100000
2.823047 -0.027764 -1.899500 0.562047 0.024265 5.100000
2.665313 -0.126683 -1.824407 0.556898 0.124260 5.100000
2.513086 -0.220283 -1.749405 0.544353 0.224260 5.100000
2.365860 -0.307610 -1.674408 0.525273 0.324262 5.100000
2.223253 -0.387970 -1.599405 0.499751 0.424260 5.100000
2.085040 -0.460717 -1.524401 0.467930 0.524257 5.100000
1.951003 -0.525394 -1.452382 0.430190 0.593400 5.100000
1.821122 -0.582013 -1.379423 0.392187 0.593400 5.100000
1.696228 -0.631065 -1.304423 0.356275 0.593400 5.100000
1.576768 -0.673231 -1.229424 0.322355 0.593400 5.100000
1.463131 -0.709186 -1.154424 0.290456 0.593400 5.100000
1.355645 -0.739570 -1.079423 0.260566 0.593400 5.100000
1.254609 -0.765004 -1.004424 0.232675 0.593400 5.100000
1.160246 -0.786080 -0.929425 0.206794 0.593400 5.100000
1.072748 -0.803342 -0.854426 0.182922 0.593400 5.100000
0.992263 -0.817329 -0.779427 0.161056 0.593400 5.100000
0.918922 -0.828499 -0.704427 0.141196 0.593400 5.100000
0.852813 -0.837292 -0.629427 0.123351 0.593400 5.100000
0.794002 -0.844114 -0.554427 0.107507 0.593400 5.100000
0.742572 -0.849299 -0.479426 0.093673 0.593400 5.100000
0.698554 -0.853176 -0.404425 0.081895 0.571316 5.100000
0.661973 -0.856020 -0.329424 0.073480 0.471371 5.100000
0.632861 -0.858083 -0.254423 0.068250 0.371367 5.100000
0.611219 -0.859527 -0.179422 0.065352 0.271367 5.100000
0.597062 -0.860448 -0.104421 0.064061 0.171371 5.100000
0.590331 -0.860877 -0.029421 0.063702 0.071364 5.100000
0.591206 -0.860821 0.045579 0.063683 -0.028633 5.100000
0.599471 -0.860286 0.120571 0.063403 -0.128628 5.100000
0.615239 -0.859296 0.195573 0.062241 -0.228630 5.100000
0.638505 -0.857878 0.270574 0.059572 -0.328632 5.100000
0.669251 -0.856114 0.345575 0.054673 -0.428628 5.100000
0.707520 -0.854168 0.420983 0.046750 -0.529056 5.100000
0.752324 -0.852327 0.443888 0.035245 -0.583127 5.100000
0.793011 -0.851110 0.369544 0.024369 -0.593400 5.100000
0.826210 -0.850450 0.294545 0.015481 -0.593400 5.100000
0.851911 -0.850138 0.219545 0.008597 -0.593400 5.100000
0.870110 -0.850025 0.144546 0.003733 -0.593400 5.100000
